# Supplementary material for: Cu-catalyzed enantioselective synthesis of tertiary benzylic copper complexes and their in situ addition to carbonyl compounds
Source: PubMed Central journal article supplement — Chem Sci. 2018 Apr 30;9(22):4992–8. doi: 10.1039/c8sc00827b (PMC5989696; doi:10.1039/c8sc00827b), 2018-04-30

## Cu-Catalyzed Enantioselective Synthesis of Tertiary Benzylic Copper Complexes and Their in situ Addition to Carbonyl Compounds

Fengchang Cheng, Wenxin Lu, Wei Huang, Lu Wen, Mingfeng Li and Fanke Meng\*

*State Key Laboratory of Organometallic Chemistry, Shanghai Institute of Organic  
Chemistry, Chinese Academy of Sciences, 345 Lingling Road, Shanghai, China, 200032*

### SUPPORTING INFORMATION

#### *Table of Contents*

|                                                                                                                                                                                           |         |
|-------------------------------------------------------------------------------------------------------------------------------------------------------------------------------------------|---------|
| General.....                                                                                                                                                                              | S2      |
| Reagents and Ligands .....                                                                                                                                                                | S2–S3   |
| Representative Experimental Procedure for Phosphine–Cu-Catalyzed Reactions of B <sub>2</sub> (pin) <sub>2</sub> , 1,1-<br>Disubstituted Alkene and ketone.....                            | S3–S4   |
| Representative Experimental Procedure for Oxidative of <b>3a</b> .....                                                                                                                    | S4      |
| Characterization of product of <b>3a-3s</b> and <b>7a-7r</b> .....                                                                                                                        | S4–S41  |
| Representative Experimental Procedure for Phosphine–Cu-Catalyzed Reactions of B <sub>2</sub> (pin) <sub>2</sub> ,<br>Alkene and Phenol Esters.....                                        | S41     |
| Characterization of product of <b>4a-4n</b> .....                                                                                                                                         | S41–S52 |
| Representative Experimental Procedure for Phosphine–Cu-Catalyzed Reactions of B <sub>2</sub> (pin) <sub>2</sub> , 1,1-<br>Disubstituted Alkene and 4-chlorophenol ester.....              | S52     |
| Characterization of product of <b>9a-9k</b> .....                                                                                                                                         | S52–S61 |
| Experimental Procedure for Gram Scale Synthesis of Phosphine–Cu-Catalyzed Reactions of<br>B <sub>2</sub> (pin) <sub>2</sub> , 2-(prop-1-en-2-yl)naphthalene and Acetophenone.....         | S61–S62 |
| Experimental Procedure for Gram Scale Synthesis of Phosphine–Cu-Catalyzed Reactions of<br>B <sub>2</sub> (pin) <sub>2</sub> , 2-(prop-1-en-2-yl)naphthalene and 4-chlorophenol ester..... | S62     |
| Representative Experimental Procedure for Pd-Catalyzed Cross Coupling of <b>7m</b> .....                                                                                                  | S62–S63 |
| Representative Experimental Procedure for Pd-Catalyzed Suzuki Coupling of <b>9f</b> .....                                                                                                 | S64–S65 |
| Representative Experimental Procedure for Oxidative of <b>3t</b> .....                                                                                                                    | S65–S66 |
| Cu-catalyzed Intramolecular Oxygenation of <b>12</b> .....                                                                                                                                | S66     |

|                                                                                                                                                                       |           |
|-----------------------------------------------------------------------------------------------------------------------------------------------------------------------|-----------|
| Representative Experimental Procedure for Oxidative of <b>3a</b> and Reduction of <b>3a-oxi</b> with Me <sub>4</sub> NHB(OAc) <sub>3</sub> .....                      | S67-S70   |
| Representative Experimental Procedure for Phosphine–Cu-Catalyzed Reactions of B <sub>2</sub> (pin) <sub>2</sub> , Alkene and MeOH.....                                | S72-S73   |
| Representative Experimental Procedure for Phosphine–Cu-Catalyzed Reactions of B <sub>2</sub> (pin) <sub>2</sub> , 1,1-Disubstituted Alkene and Cyanation reagent..... | S73-S74   |
| Representative Experimental Procedure for Phosphine–Cu-Catalyzed Reactions of B <sub>2</sub> (pin) <sub>2</sub> , 1,1-Disubstituted Alkene and Benzaldehyde.....      | S74-S75   |
| Representative Experimental Procedure for Phosphine–Cu-Catalyzed Reactions of B <sub>2</sub> (pin) <sub>2</sub> , 1,1-Disubstituted Alkene and Aldimine.....          | S75-S77   |
| Additional Data for Ligand Screen.....                                                                                                                                | S78       |
| Proof of Stereochemistry: X-ray Characterization Data.....                                                                                                            | S79-S101  |
| NMR Spectra.....                                                                                                                                                      | S102-S222 |

■ **General.** Infrared (IR) spectra were recorded on a BRUKER TENSOR 27 FT-IR spectrometer,  $\nu_{\max}$  in cm<sup>-1</sup>. Bands are characterized as broad (br), strong (s), medium (m), and weak (w). <sup>1</sup>H NMR spectra were recorded on an Agilent 400 MHz spectrometers. Chemical shifts are reported in ppm from tetramethylsilane with the solvent resonance as the internal standard (CDCl<sub>3</sub>;  $\delta$  7.26 ppm). Data are reported as follows: chemical shift, integration, multiplicity (s = singlet, d = doublet, t = triplet, q = quartet, m = multiplet), and coupling constant (Hz). <sup>13</sup>C NMR spectra were recorded on an Agilent 100 MHz spectrometers with complete proton decoupling. Chemical shifts are reported in ppm from tetramethylsilane with the solvent resonance as the internal standard (CDCl<sub>3</sub>;  $\delta$  77.00 ppm). <sup>11</sup>B NMR spectra were recorded on Bruker 128 MHz spectrometers. Chemical shifts are reported in ppm from Boron fluoride ethyl ether as the external standard (BF<sub>3</sub>·C<sub>2</sub>H<sub>5</sub>OC<sub>2</sub>H<sub>5</sub>;  $\delta$  0.00 ppm). EI-HRMS and ESI-HRMS spectra were obtained on a Waters Micromass G1540N/GCT Premier and a Thermo Fisher Scientific LTQ FT Ultra or Agilent Technologies 6224 TOF LC/MS respectively. Enantiomeric ratios were determined by high-performance liquid chromatography (HPLC) with a Shimadzu LC-20AT chromatograph (Chiralcel IG (4.6 x 250 mm), Chiralcel AD-H (4.6 x 250 mm), Chiralcel OZ-H (4.6 x 250 mm), Chiralcel IC (4.6 x 250 mm)) in comparison with authentic racemic materials. Specific rotations were measured on a Rudolph Research Analytical Autopol VI Polarimeter and Autopol I Polarimeter. Unless otherwise noted, all reactions were carried out with distilled and degassed solvents under an atmosphere of dry N<sub>2</sub> in oven- (135 °C) or flame-dried glassware with standard dry box or vacuum-line techniques. Anhydrous tetrahydrofuran (Energy Chemical Co., Ltd.) were used without further purification. All work-up and purification procedures were carried out with reagent grade solvents (purchased from Fisher Scientific) in air.

■ **Reagents and Ligands:**

**Copper chloride:** purchased from Strem Chemicals Inc. and used as received.

**Copper iodide:** purchased from Strem Chemicals Inc. and used as received.

**Chiral phosphine ligands (6):** purchased from Strem Chemicals Inc. and used as received.

**Tricyclohexylphosphine:** purchased from Energy Chemical Co., Ltd. and used as received.

**Bis(pinacolato)diboron:** purchased from Dalian AllyChem Co., Ltd. and recrystallized from pentane.

**1,1-disubstituted alkenes (1):** prepared according to a previous reported procedure.<sup>1</sup>

**Ketone (2):** purchased from Tokyo Chemical Industry Co., Ltd. or Energy Chemical Co., Ltd. and used as received.

**Phenol Ester (7, 8):** prepared according to a previous reported procedure.<sup>2,3</sup>

**4Å molecular sieve:** purchased from Energy Chemical Co., Ltd. and dried in Muffle at 400 °C for 12 hours.

**Lithium *tert*-butoxide, potassium carbonate and sodium chloride:** purchased from J&K Chemical Ltd. and used as received.

**NHC copper chloride 6j:** prepared according to a previous reported procedure.<sup>4</sup>

**Sodium perborate tetrahydrate:** purchased from Energy Chemical Co., Ltd. and used as received.

**Potassium hydrogen fluoride:** purchased from Tokyo Chemical Industry Co., Ltd. and used as received.

**Palladium diacetate:** purchased from Adamas Reagent, Ltd. and used as received.

**RuPhos:** purchased from Sinocompound Co., Ltd. and used as received.

**4-Bromoanisole:** purchased from Energy Chemical Co., Ltd. and used as received.

**TetraMethylammonium triacetoxyborohydride:** purchased from Energy Chemical Co., Ltd. and used as received.

■ **Representative Experimental Procedure for Phosphine–Cu-Catalyzed Reactions of B<sub>2</sub>(pin)<sub>2</sub>, 1,1-Disubstituted Alkene and Ketone:** In a N<sub>2</sub>-filled glove-box, an oven-dried vial (4 mL, 17 × 38 mm) with a magnetic stir bar was charged with (*R,R*)-Ph-BPE (10.1 mg, 0.02 mmol, 10 mol %), CuCl (2.0 mg, 0.02 mmol, 10 mol%), LiO*t*-Bu (24.0 mg, 0.3 mmol, 1.5 equiv), 4Å molecular sieve (200 mg) and tetrahydrofuran (thf, 1 mL). The vessel was sealed with a cap (phenolic open top cap with red PTFE/white silicone septum) and the solution

---

(1) Maity, S; Naveen, T; Sharma, U. *Org. Lett.*, **2013**, 15, 3384.

(2) Gu, J. X.; Holland, H. L. *Synth. Commun.* **1998**, 28, 3305.

(3) Kankanala K, Reddy V R, Mukkanti K. *J. Fluorine Chem.*, **2009**, 130, 505.

(4) Park, J, Lackey, H, Rexford M. *Org. Lett.*, **2010**, 12, 5008.

was allowed to stir at 22 °C for one hour. Bis(pinacolato)diboron (76.2 mg, 0.30 mmol, 1.5 equiv) was added to the solution, causing it to turn dark brown immediately. The vial was re-sealed with a cap (phenolic open top cap with red PTFE/white silicone septum). The mixture was allowed to stir at 22 °C for 30 min under an atmosphere of N<sub>2</sub>. Alkene **1a** (63.3 mg, 0.40 mmol, 2.0 equiv) and acetophenone (24.0 mg, 0.20 mmol, 1.0 equiv) were added. The resulting solution was allowed to stir at 22 °C for 16 h before the reaction was quenched by passing the mixture through a short plug of celite and silica gel and eluted with Et<sub>2</sub>O (3 × 2 mL). The filtrate was concentrated *in vacuo* to provide yellow oil. The crude was purified by silica gel chromatography (petroleum ether : ethyl acetate = 15:1) to afford **3a** as white solid (56.3 mg, 0.18 mmol, 92% yield).

### ■ Representative Experimental Procedure for Oxidative of **3a**.

**3a** (48.0 mg, 0.15 mmol, 1 equiv) was dissolved in tetrahydrofuran (thf, 1.0 mL). NaBO<sub>3</sub>•4H<sub>2</sub>O (92.3 mg, 0.60 mmol, 4.0 equiv) and H<sub>2</sub>O (1 mL) were added. The resulting mixture was allowed to stir at 22 °C for three hours. The aqueous layer was washed with Et<sub>2</sub>O (3 × 2 mL). The combined organic layers were concentrated *in vacuo* to provide colorless oil, which was purified by silica gel chromatography (petroleum ether : ethyl acetate = 5:1) to afford **7** as white solid (42.1 mg, 0.14 mmol, 95% yield).

### ■ Characterization of product of **3a-3s** and **7a-7r**.

**(4*S*,5*S*)-4-(Benzofuran-2-yl)-4,5-dimethyl-5-phenyl-1,2-oxaborolan-2-ol (3a).** Yield: (56.3 mg, 92%); IR (neat): 3323 (m), 2968 (w), 1598 (w), 1437 (s), 1311 (m), 1287 (s), 1252 (s), 1172 (m), 1120 (s), 1062 (s), 1004 (m), 946 (m), 933 (s), 850 (m), 762 (s), 702 (s) cm<sup>-1</sup>; <sup>1</sup>H NMR (400 MHz, CDCl<sub>3</sub>): δ 7.33 - 7.29 (m, 2H), 7.20 - 7.05 (m, 4H), 7.04 - 6.95 (m, 3H), 6.08 (s, 1H), 5.91 (s, 1H), 1.86 (s, 3H), 1.69 - 1.58 (m, 4H), 1.28 (d, *J* = 16.4 Hz, 1H); <sup>13</sup>C NMR (100 MHz, CDCl<sub>3</sub>): δ 162.1, 154.2, 143.7, 128.1, 127.3, 126.6, 124.4, 123.3, 122.2, 120.3, 110.6, 102.5, 89.5, 50.4, 24.9, 22.9; HRMS (ESI<sup>+</sup>) [M+H]<sup>+</sup>: Calcd for C<sub>19</sub>H<sub>20</sub>O<sub>3</sub>B: 306.1536, found: 306.1533; Specific rotation: [α]<sub>D</sub><sup>20</sup> -34.0 (*c* 1.00, CHCl<sub>3</sub>) for an enantiomerically enriched sample of >99:1 e.r.

**(2*S*,3*S*)-2-(Benzofuran-2-yl)-2-methyl-3-phenylbutane-1,3-diol (3a-oxi).** Yield: (41.2 mg, 95%); IR (neat): 3172 (br), 2974 (w), 2920 (w), 1476 (w), 1431 (s), 1375 (m), 1243 (m), 1137 (m), 1109 (m), 1032 (s), 997 (m), 919 (s), 824 (s), 758 (s), 697 (s) cm<sup>-1</sup>; <sup>1</sup>H NMR (400 MHz, CDCl<sub>3</sub>): δ 7.48 (d, *J* = 7.4 Hz, 1H), 7.41 (d, *J* = 7.8 Hz, 1H), 7.29 - 7.06 (m, 7H), 6.27 (s, 1H), 3.98 - 3.84 (m, 2H), 3.71 (s, 1H), 1.72 (s, 3H), 1.53 (s, 3H); <sup>13</sup>C NMR (100 MHz, CDCl<sub>3</sub>): δ 159.9, 154.0, 144.5, 128.0, 127.2, 126.9, 126.4, 123.8, 122.7, 120.7, 111.0, 104.9, 79.6, 67.6, 48.8, 26.1, 17.9; HRMS (ESI<sup>+</sup>) [M+NH<sub>4</sub>]<sup>+</sup>: Calcd for C<sub>19</sub>H<sub>24</sub>O<sub>3</sub>N: 314.1751, found: 314.1747; Specific rotation: [α]<sub>D</sub><sup>20</sup> -41.2 (*c* 1.00, CHCl<sub>3</sub>) for an enantiomerically enriched sample of >99:1 e.r.

Enantiomeric purity of **3a-oxi** was determined by HPLC analysis in comparison with authentic racemic material (>99:1 e.r. shown; Chiralcel OZ-H column, 97:3 hexanes/ *i*PrOH, 0.8 mL/min, 254 nm).

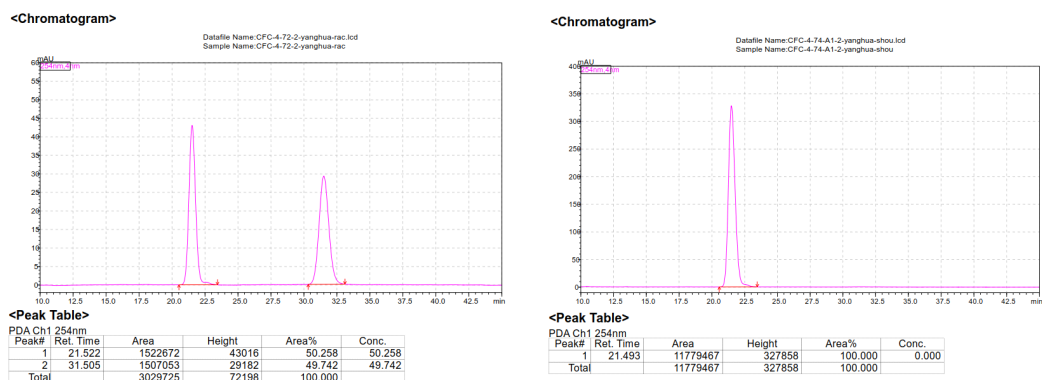

| Peak # | Time (min) | Area (%) | Peak # | Time (min) | Area (%) |
|--------|------------|----------|--------|------------|----------|
| 1      | 21.522     | 50.258   | 1      | 21.493     | >99.000  |
| 2      | 31.505     | 49.742   | 2      |            | <1.000   |

**(4*S*,5*S*)-4-(Benzofuran-2-yl)-4,5-dimethyl-5-(4-(trifluoromethyl)phenyl)-1,2-oxaborolan-2-ol (3b).** Yield: (41.9 mg, 56%); IR (neat): 3302 (m), 2945 (w), 1556 (w), 1447 (s), 1323 (m), 1236 (s), 1221 (s), 1112 (m), 1060 (s), 967 (m), 921 (s), 820 (m), 760 (s), 699 (s)  $\text{cm}^{-1}$ ;  $^1\text{H NMR}$  (400 MHz,  $\text{CDCl}_3$ ):  $\delta$  7.31 (d,  $J = 7.4$  Hz, 1H), 7.26 - 7.03 (m, 7H), 6.11 (s, 1H), 5.51 (s, 1H), 1.79 (s, 3H), 1.68 - 1.56 (m, 4H), 1.33 (d,  $J = 16.6$  Hz, 1H);  $^{13}\text{C NMR}$  (100 MHz,  $\text{CDCl}_3$ ):  $\delta$  161.4, 154.2, 148.0, 128.8 (q,  $J = 32.4$  Hz), 127.8, 124.8, 124.3 (q,  $J = 3.8$  Hz), 123.6, 121.2 (q,  $J = 271.0$  Hz), 122.4, 110.5, 102.8, 89.1, 50.6, 24.8, 22.7;  $^{19}\text{F NMR}$  (376 MHz,  $\text{CDCl}_3$ ):  $\delta$  -63.6; HRMS ( $\text{ESI}^+$ )  $[\text{M}+\text{H}]^+$ : Calcd for:  $\text{C}_{20}\text{H}_{19}\text{BF}_3\text{O}_3$ : 374.1410 m/z, found: 374.1405 m/z; Specific rotation:  $[\alpha]_{\text{D}}^{20}$  -10.9 ( $c$  1.00,  $\text{CHCl}_3$ ) for an enantiomerically enriched sample of >99:1 e.r.

**(2*S*,3*S*)-2-(Benzofuran-2-yl)-2-methyl-3-(4-(trifluoromethyl)phenyl)butane-1,3-diol (3b-oxi).** Yield: (31.5 mg, 95%); IR (neat): 3165 (br), 2945 (w), 2910 (w), 1498 (w), 1425 (s), 1367 (m), 1242 (m), 1120 (m), 1099 (m), 1025 (s), 956 (m), 910 (s), 816 (s), 778 (s), 654 (s)  $\text{cm}^{-1}$ ;  $^1\text{H NMR}$  (400 MHz,  $\text{CDCl}_3$ ):  $\delta$  7.50 (d,  $J = 7.4$  Hz, 1H), 7.46 - 7.36 (m, 3H), 7.30 - 7.19 (m, 4H), 6.30 (s, 1H), 4.00 - 3.82 (m, 3H), 2.83 (s, 1H), 1.74 (s, 3H), 1.51 (s, 3H);  $^{13}\text{C NMR}$  (100 MHz,  $\text{CDCl}_3$ ):  $\delta$  159.3, 154.0, 148.7, 129.1 (q,  $J = 32.6$  Hz), 127.7, 126.9, 124.2 (q,  $J = 271.0$  Hz), 124.1 (q,  $J = 3.4$  Hz), 122.9, 120.8, 111.0, 105.1, 79.5, 67.6, 48.6, 26.1, 18.0;  $^{19}\text{F NMR}$  (376 MHz,  $\text{CDCl}_3$ ):  $\delta$  -62.4; HRMS ( $\text{ESI}^+$ )  $[\text{M}+\text{NH}_4]^+$ : Calcd for:  $\text{C}_{20}\text{H}_{23}\text{O}_3\text{NF}_3$ : 382.1625 m/z, found: 382.1622 m/z; Specific rotation:  $[\alpha]_{\text{D}}^{20}$  -43.3 ( $c$  1.00,  $\text{CHCl}_3$ ) for an enantiomerically enriched sample of >99:1 e.r.

Enantiomeric purity of **3b-oxi** was determined by HPLC analysis in comparison with authentic racemic material (>99:1 e.r. shown; Chiralcel OZ-H column, 98:2 hexanes/ *i*PrOH, 0.8 mL/min, 254 nm).

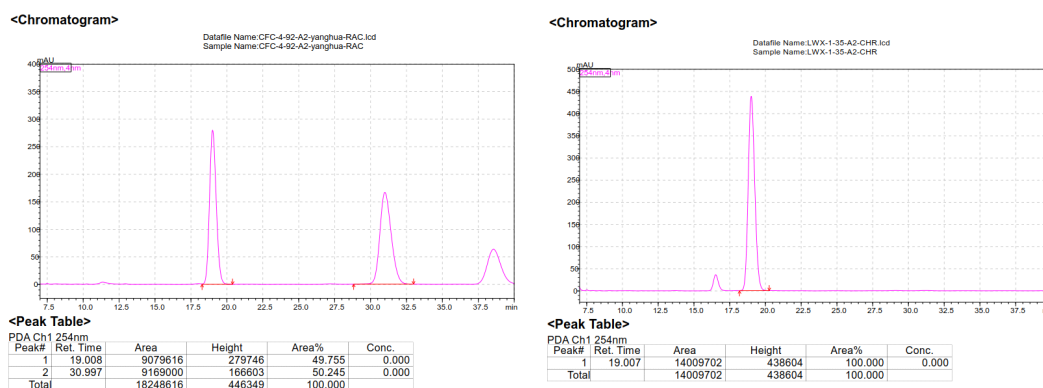

| Peak # | Time (min) | Area (%) | Peak # | Time (min) | Area (%) |
|--------|------------|----------|--------|------------|----------|
| 1      | 19.008     | 49.755   | 1      | 19.007     | >99.000  |
| 2      | 30.997     | 50.245   | 2      |            | <1.000   |

**(4*S*,5*S*)-4-(Benzofuran-2-yl)-5-(4-chlorophenyl)-4,5-dimethyl-1,2-oxaborolan-2-ol (3c)**. Yield: (53.7 mg, 79%); IR (neat): 3369 (br), 2965 (m), 2931 (m), 1490 (m), 1453 (s), 1424 (s), 1396 (s), 1306 (m), 1257 (s), 1170 (m), 1093 (s), 1051 (m), 1021 (s), 916 (w), 802 (s), 739 (s)  $\text{cm}^{-1}$ ;  $^1\text{H}$  NMR (400 MHz,  $\text{CDCl}_3$ ):  $\delta$  7.37 - 7.25 (m, 2H), 7.21 - 7.07 (m, 2H), 7.04 - 6.91 (m, 4H), 6.10 (s, 1H), 5.95 (s, 1H), 1.79 (s, 3H), 1.65 - 1.55 (m, 4H), 1.29 (d,  $J = 16.0$  Hz, 1H);  $^{13}\text{C}$  NMR (100 MHz,  $\text{CDCl}_3$ ):  $\delta$  161.7, 154.2, 142.5, 132.5, 127.9, 127.4, 125.9, 123.5, 122.4, 120.4, 110.6, 102.7, 89.1, 50.4, 24.9, 22.8; HRMS (ESI<sup>+</sup>)  $[\text{M}+\text{H}]^+$ : Calcd for:  $\text{C}_{19}\text{H}_{19}\text{BClO}_3$ : 340.1147 m/z, found: 340.1143 m/z; Specific rotation:  $[\alpha]_{\text{D}}^{20}$  -16.1 ( $c$  1.00,  $\text{CHCl}_3$ ) for an enantiomerically enriched sample of >99:1 e.r.

**(2*S*,3*S*)-2-(Benzofuran-2-yl)-3-(4-chlorophenyl)-2-methylbutane-1,3-diol (3c-oxi)**. Yield: (48.0 mg, 92%); IR (neat): 3181 (br), 2919 (w), 2849 (w), 1488 (s), 1451 (s), 1270 (m), 1162 (w), 1096 (s), 1028 (s), 938 (m), 843 (m), 811 (s), 735 (s), 647 (w)  $\text{cm}^{-1}$ ;  $^1\text{H}$  NMR (400 MHz,  $\text{CDCl}_3$ ):  $\delta$  7.48 (d,  $J = 7.4$  Hz, 1H), 7.40 (d,  $J = 7.8$  Hz, 1H), 7.29 - 7.17 (m, 2H), 7.14 (d,  $J = 7.6$  Hz, 2H), 7.02 (d,  $J = 7.6$  Hz, 2H), 6.27 (s, 1H), 3.99 - 3.77 (m, 3H), 3.02 (s, 1H), 1.69 (s, 3H), 1.49 (s, 3H);  $^{13}\text{C}$  NMR (100 MHz,  $\text{CDCl}_3$ ):  $\delta$  159.5, 153.9, 143.1, 132.7, 128.0, 127.8, 127.2, 123.9, 122.8, 120.7, 111.0, 105.0, 79.4, 67.6, 48.6, 26.0, 17.9; HRMS (ESI<sup>+</sup>)  $[\text{M}+\text{NH}_4]^+$ : Calcd for  $\text{C}_{19}\text{H}_{23}\text{ClNO}_3$ : 348.1361 m/z, found: 348.1363 m/z; Specific rotation:  $[\alpha]_{\text{D}}^{20}$  -39.4 ( $c$  1.00,  $\text{CHCl}_3$ ) for an enantiomerically enriched sample of >99:1 e.r.

Enantiomeric purity of **3c-oxi** was determined by HPLC analysis in comparison with authentic racemic material (>99:1 e.r. shown; Chiralcel OZ-H column, 97:3 hexanes/ *i*PrOH, 0.8 mL/min, 254 nm).

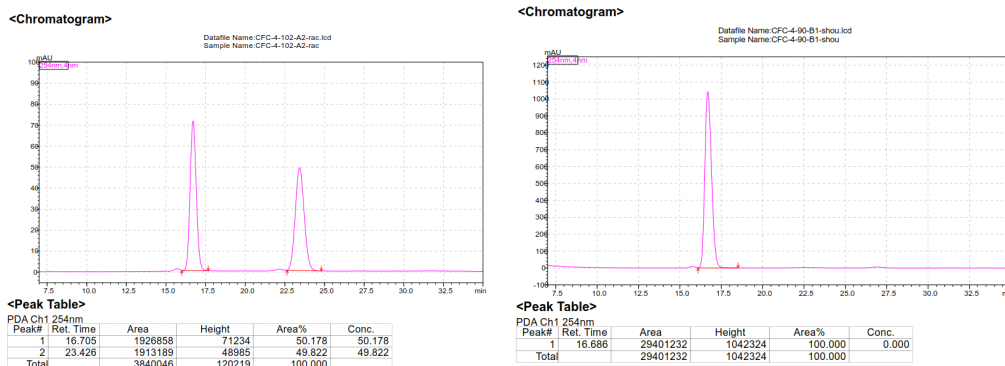

| Peak # | Time (min) | Area (%) | Peak # | Time (min) | Area (%) |
|--------|------------|----------|--------|------------|----------|
| 1      | 16.705     | 50.178   | 1      | 16.686     | >99.000  |
| 2      | 23.426     | 49.822   | 2      |            | <1.000   |

**(4*S*,5*S*)-4-(Benzofuran-2-yl)-5-(4-bromophenyl)-4,5-dimethyl-1,2-oxaborolan-2-ol (3d).** Yield: (55.3 mg, 72%); IR (neat): 3361 (br), 2965 (m), 2931 (m), 1575 (w), 1486 (m), 1453 (s), 1392 (s), 1303(m), 1256 (s), 1170 (w), 1079 (s), 1050 (m), 1008 (s), 915 (m), 802 (s), 737 (s), 698 (m)  $\text{cm}^{-1}$ ;  $^1\text{H NMR}$  (400 MHz,  $\text{CDCl}_3$ ):  $\delta$  7.37 - 7.26 (m, 2H), 7.22 - 7.07 (m, 2H), 6.93 (d,  $J = 8.4$  Hz, 2H), 6.11 (s, 1H), 5.87 (s, 1H), 1.78 (s, 1H), 1.68 - 1.52 (m, 4H), 1.29 (d,  $J = 16.2$  Hz, 1H);  $^{13}\text{C NMR}$  (100 MHz,  $\text{CDCl}_3$ ):  $\delta$  161.7, 154.3, 143.1, 130.4, 128.0, 126.3, 123.6, 122.4, 120.7, 120.5, 110.7, 102.8, 89.1, 50.4, 24.9, 22.8; HRMS ( $\text{ESI}^+$ )  $[\text{M}+\text{H}]^+$ : Calcd for:  $\text{C}_{19}\text{H}_{19}\text{BBrO}_3$ : 384.0641 m/z, found: 384.0637 m/z; Specific rotation:  $[\alpha]_{\text{D}}^{20} -15.5$  ( $c$  1.00,  $\text{CHCl}_3$ ) for an enantiomerically enriched sample of >99:1 e.r.

**(2*S*,3*S*)-2-(Benzofuran-2-yl)-3-(4-bromophenyl)-2-methylbutane-1,3-diol (3d-oxi).** Yield: (50.0 mg, 93%); IR (neat): 3194 (br), 2920 (m), 2849 (w), 1588 (w), 1484 (m), 1450 (s), 1396 (m), 1254 (m), 1198 (m), 1137 (m), 1053 (m), 1021 (s), 1007 (s), 914 (s), 840 (s), 808 (s), 733 (s), 676 (m)  $\text{cm}^{-1}$ ;  $^1\text{H NMR}$  (400 MHz,  $\text{CDCl}_3$ ):  $\delta$  7.49 (d,  $J = 7.6$  Hz, 1H), 7.41 (d,  $J = 8.0$  Hz, 1H), 7.33 - 7.18 (m, 4H), 6.99 (d,  $J = 7.8$  Hz, 2H), 6.29 (s, 1H), 4.01 - 3.84 (m, 2H), 3.69 (s, 1H), 2.73 (s, 1H), 1.70 (s, 3H), 1.48 (s, 3H);  $^{13}\text{C NMR}$  (100 MHz,  $\text{CDCl}_3$ ):  $\delta$  159.5, 143.6, 130.2, 128.4, 127.8, 124.0, 122.8, 121.0, 120.8, 111.0, 105.1, 79.3, 67.7, 48.7, 26.1, 18.0; HRMS ( $\text{ESI}^+$ )  $[\text{M}+\text{NH}_4]^+$ : Calcd for  $\text{C}_{19}\text{H}_{23}\text{BrNO}_3$ : 392.0856 m/z, found: 392.0857 m/z; Specific rotation:  $[\alpha]_{\text{D}}^{20} -41.1$  ( $c$  1.00,  $\text{CHCl}_3$ ) for an enantiomerically enriched sample of >99:1 e.r.

Enantiomeric purity of **3d-oxi** was determined by HPLC analysis in comparison with authentic racemic material (>99:1 e.r. shown; Chiralcel OZ-H column, 97:3 hexanes/ *i*PrOH, 0.8 mL/min, 254 nm).

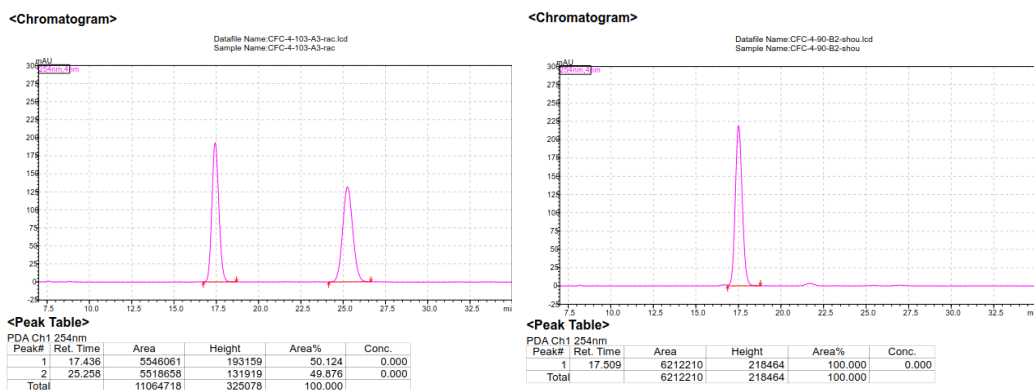

| Peak # | Time (min) | Area (%) | Peak # | Time (min) | Area (%) |
|--------|------------|----------|--------|------------|----------|
| 1      | 17.436     | 50.124   | 1      | 17.509     | >99.000  |
| 2      | 25.258     | 49.876   | 2      |            | <1.000   |

**(4*S*,5*S*)-4-(Benzofuran-2-yl)-5-(3-chlorophenyl)-4,5-dimethyl-1,2-oxaborolan-2-ol (3e).** Yield: (53.7 mg, 79%); IR (neat): 3340 (br), 2975 (m), 2930 (w), 1593 (m), 1570 (m), 1453 (s), 1429 (s), 1351 (m), 1253 (s), 1169 (m), 1110 (m), 996 (m), 882 (m), 828 (m), 804 (s), 740 (s), 692 (s)  $\text{cm}^{-1}$ ;  $^1\text{H NMR}$  (400 MHz,  $\text{CDCl}_3$ ):  $\delta$  7.35 - 7.26 (m, 2H), 7.21 - 7.05 (m, 3H), 7.00 - 6.86 (m, 3H), 6.11 (s, 1H), 5.62 (s, 1H), 1.78 (s, 3H), 1.66 - 1.58 (m, 4H), 1.31 (d,  $J = 16.4$  Hz, 1H);  $^{13}\text{C NMR}$  (100 MHz,  $\text{CDCl}_3$ ):  $\delta$  161.7, 154.2, 146.0, 133.5, 128.6, 127.9, 126.6, 124.8, 123.5, 122.6, 122.3, 120.3, 110.6, 102.7, 89.1, 50.5, 24.9, 22.7; HRMS ( $\text{ESI}^+$ )  $[\text{M}+\text{H}]^+$ : Calcd for:  $\text{C}_{19}\text{H}_{19}\text{BClO}_3$ : 340.1147 m/z, found: 340.1143 m/z; Specific rotation:  $[\alpha]_{\text{D}}^{20} -10.0$  ( $c$  1.00,  $\text{CHCl}_3$ ) for an enantiomerically enriched sample of >99:1 e.r.

**(2*S*,3*S*)-2-(Benzofuran-2-yl)-3-(3-chlorophenyl)-2-methylbutane-1,3-diol (3e-oxi).** Yield: (46.9 mg, 90%); IR (neat): 3161 (br), 2978 (m), 2948 (m), 1590 (m), 1567 (m), 1451 (s), 1407 (m), 1252 (m), 1196 (m), 1161 (m), 1088 (m), 1031 (s), 953 (m), 898 (m), 809 (s), 742 (s), 685 (s)  $\text{cm}^{-1}$ ;  $^1\text{H NMR}$  (400 MHz,  $\text{CDCl}_3$ ):  $\delta$  7.49 (d,  $J = 7.6$  Hz, 1H), 7.40 (d,  $J = 7.8$  Hz, 1H), 7.29 - 7.13 (m, 4H), 7.07 (t,  $J = 8.0$  Hz, 1H), 6.91 (d,  $J = 8.0$  Hz, 1H), 6.31 (s, 1H), 3.98 - 3.80 (m, 3H), 2.89 (s, 1H), 1.68 (s, 3H), 1.50 (s, 3H);  $^{13}\text{C NMR}$  (100 MHz,  $\text{CDCl}_3$ ):  $\delta$  159.4, 154.0, 146.8, 133.3, 128.3, 127.8, 127.0, 126.8, 124.7, 123.9, 122.8, 120.7, 111.0, 105.1, 79.3, 67.5, 48.7, 26.0, 17.9; HRMS ( $\text{ESI}^+$ )  $[\text{M}+\text{NH}_4]^+$ : Calcd for:  $\text{C}_{19}\text{H}_{23}\text{ClNO}_3$ : 348.1361 m/z, found: 348.1360 m/z; Specific rotation:  $[\alpha]_{\text{D}}^{20} -41.4$  ( $c$  1.00,  $\text{CHCl}_3$ ) for an enantiomerically enriched sample of >99:1 e.r.

Enantiomeric purity of **3e-oxi** was determined by HPLC analysis in comparison with authentic racemic material (>99:1 e.r. shown; Chiralcel OZ-H column, 97:3 hexanes/ *i*PrOH, 0.8 mL/min, 254 nm).



&lt;Chromatogram&gt;

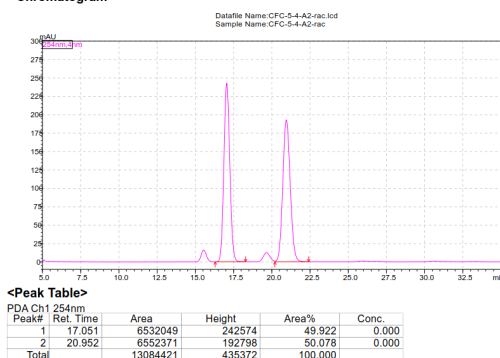

&lt;Chromatogram&gt;

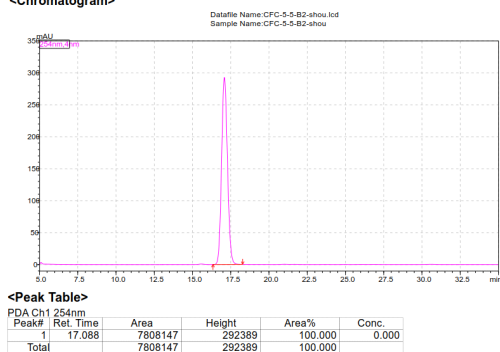

| Peak # | Time (min) | Area (%) | Peak # | Time (min) | Area (%) |
|--------|------------|----------|--------|------------|----------|
| 1      | 17.051     | 49.922   | 1      | 17.088     | >99.000  |
| 2      | 20.952     | 50.078   | 2      |            | <1.000   |

**(4*S*,5*S*)-4-(Benzofuran-2-yl)-5-(3-fluorophenyl)-4,5-dimethyl-1,2-oxaborolan-2-ol (3f).**

**Yield:** (43.4 mg, 67%); **IR (neat):** 3372 (br), 2926 (m), 2854 (m), 1614 (w), 1587 (m), 1483 (m), 1453 (s), 1426 (s), 1292 (m), 1255 (s), 1185 (m), 1102 (m), 1057 (m), 939 (m), 880 (m), 789 (m), 739 (s), 700 (m)  $\text{cm}^{-1}$ ;  **$^1\text{H}$  NMR (400 MHz,  $\text{CDCl}_3$ ):**  $\delta$  7.34 - 7.24 (m, 2H), 7.18 - 7.06 (m, 2H), 6.97 - 6.89 (m, 1H), 6.83 (t,  $J = 8.8$  Hz, 2H), 6.74 - 6.64 (m, 1H), 6.10 (s, 1H), 5.59 (s, 1H), 1.78 (s, 3H), 1.66 - 1.58 (m, 4H), 1.31 (d,  $J = 16.4$  Hz, 1H);  **$^{13}\text{C}$  NMR (100 MHz,  $\text{CDCl}_3$ ):**  $\delta$  163.5, 161.8, 161.0, 154.2, 146.7 (d,  $J = 6.8$  Hz), 128.8 (d,  $J = 8.0$  Hz), 128.0, 123.5, 122.3, 120.3, 120.2 (d,  $J = 2.6$  Hz), 113.3 (d,  $J = 21.0$  Hz), 111.8 (d,  $J = 23.2$  Hz), 110.6, 102.6, 89.0, 50.5, 25.0, 22.8;  **$^{19}\text{F}$  NMR (376 MHz,  $\text{CDCl}_3$ ):**  $\delta$  -114.1; **HRMS ( $\text{ESI}^+$ )  $[\text{M}+\text{H}]^+$ :** Calcd for:  $\text{C}_{19}\text{H}_{19}\text{BF}_3$ : 324.1442 m/z, found: 324.1440 m/z; Specific rotation:  $[\alpha]_{\text{D}}^{20}$  -5.3 ( $c$  1.00,  $\text{CHCl}_3$ ) for an enantiomerically enriched sample of >99:1 e.r.

**(2*S*,3*S*)-2-(Benzofuran-2-yl)-3-(3-fluorophenyl)-2-methylbutane-1,3-diol (3f-oxi).**

**Yield:** (37.4 mg, 89%); **IR (neat):** 3300 (br), 2918 (w), 2848 (m), 1645 (w), 1586 (s), 1453 (m), 1375 (m), 1253 (s), 1197 (s), 1066 (m), 1033 (s), 932 (m), 883 (m), 827 (m), 739 (s), 700 (m)  $\text{cm}^{-1}$ ;  **$^1\text{H}$  NMR (400 MHz,  $\text{CDCl}_3$ ):**  $\delta$  7.49 (d,  $J = 7.4$  Hz, 1H), 7.41 (d,  $J = 8.0$  Hz, 1H), 7.30 - 7.17 (m, 2H), 7.16 - 7.08 (m, 1H), 6.98 - 6.86 (m, 2H), 6.83 (d,  $J = 7.9$  Hz, 1H), 6.32 (s, 1H), 3.98 - 3.85 (m, 2H), 3.81 (s, 1H), 2.87 (s, 1H), 1.70 (s, 3H), 1.51 (s, 3H);  **$^{13}\text{C}$  NMR (100 MHz,  $\text{CDCl}_3$ ):**  $\delta$  163.3, 160.9, 159.5, 154.0, 147.4 (d,  $J = 6.4$  Hz), 128.5 (d,  $J = 8.2$  Hz), 127.8, 123.9, 122.8, 122.2 (d,  $J = 2.6$  Hz), 120.7, 113.9, 113.7 (d,  $J = 7.8$  Hz), 113.5, 111.0, 105.0, 79.3, 67.5, 48.7, 26.1, 18.0;  **$^{19}\text{F}$  NMR (376 MHz,  $\text{CDCl}_3$ ):**  $\delta$  -113.9; **HRMS ( $\text{ESI}^+$ )  $[\text{M}+\text{NH}_4]^+$ :** Calcd for:  $\text{C}_{19}\text{H}_{23}\text{FNO}_3$ : 332.1656 m/z, found: 332.1656 m/z; Specific rotation:  $[\alpha]_{\text{D}}^{20}$  -37.5 ( $c$  1.00,  $\text{CHCl}_3$ ) for an enantiomerically enriched sample of >99:1 e.r.

Enantiomeric purity of **3f-oxi** was determined by HPLC analysis in comparison with authentic racemic material (>99:1 e.r. shown; Chiralcel OZ-H column, 97:3 hexanes/ *i*PrOH, 0.8 mL/min, 254 nm).

&lt;Chromatogram&gt;

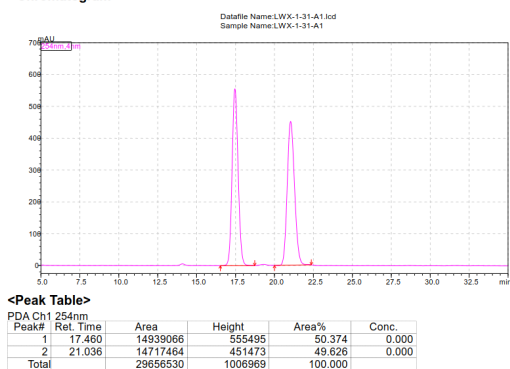

&lt;Chromatogram&gt;

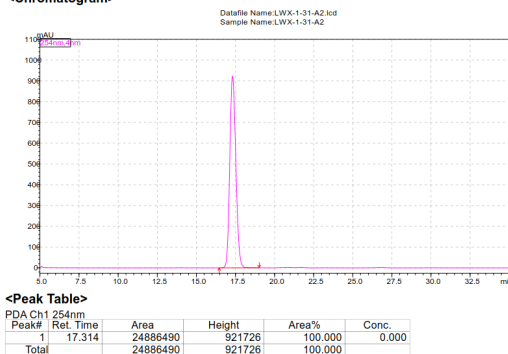

| Peak # | Time (min) | Area (%) | Peak # | Time (min) | Area (%) |
|--------|------------|----------|--------|------------|----------|
| 1      | 17.460     | 50.374   | 1      | 17.314     | >99.000  |
| 2      | 21.036     | 49.626   | 2      |            | <1.000   |

**Methyl 4-((4*S*,5*S*)-4-(benzofuran-2-yl)-2-hydroxy-4,5-dimethyl-1,2-oxaborolan-5-yl)benzoate (3g).** Yield: (48.0 mg, 66%); IR (neat): 3419 (br), 2952 (m), 2924 (m), 1722 (m), 1454 (m), 1403 (m), 1280 (s), 1191 (m), 1114 (m), 968 (m), 818 (m), 802 (m), 772 (m)  $\text{cm}^{-1}$ ;  $^1\text{H}$  NMR (400 MHz,  $\text{CDCl}_3$ ):  $\delta$  7.67 (d,  $J = 7.8$  Hz, 2H), 7.33 - 7.21 (m, 2H), 7.19 - 7.00 (m, 4H), 6.05 (s, 1H), 5.58 (s, 1H), 3.81 (s, 3H), 1.78 (s, 3H), 1.64 (s, 3H), 1.58 (d,  $J = 16.2$  Hz, 1H), 1.30 (d,  $J = 16.4$  Hz, 1H);  $^{13}\text{C}$  NMR (100 MHz,  $\text{CDCl}_3$ ):  $\delta$  166.9, 161.7, 154.2, 149.3, 128.7, 128.2, 127.9, 124.6, 123.5, 122.3, 120.4, 110.6, 102.6, 89.1, 51.9, 50.6, 25.1, 22.8; HRMS (ESI<sup>+</sup>)  $[\text{M}+\text{NH}_4]^+$ : Calcd for :  $\text{C}_{21}\text{H}_{25}\text{BNO}_5$ : 381.1857 m/z, found: 381.1853 m/z; Specific rotation:  $[\alpha]_{\text{D}}^{20}$  -0.5 ( $c$  1.00,  $\text{CHCl}_3$ ) for an enantiomerically enriched sample of >99:1 e.r.

**Methyl 4-((2*S*,3*S*)-3-(benzofuran-2-yl)-2,4-dihydroxy-3-methylbutan-2-yl)benzoate (3g-oxi).** Yield: (44.4 mg, 95%); IR (neat): 3344 (br), 2983 (w), 2920 (m), 1702 (s), 1608 (s), 1452 (m), 1375 (m), 1279 (s), 1254 (s), 1190 (m), 1100 (m), 1016 (s), 919 (m), 884 (m), 863 (m), 799 (s), 748 (s), 683 (m)  $\text{cm}^{-1}$ ;  $^1\text{H}$  NMR (400 MHz,  $\text{CDCl}_3$ ):  $\delta$  7.83 (d,  $J = 8.2$  Hz, 2H), 7.47 (d,  $J = 7.2$  Hz, 1H), 7.39 (d,  $J = 8.0$  Hz, 1H), 7.30 - 7.13 (m, 4H), 6.25 (s, 1H), 4.00 (s, 1H), 3.95 - 3.82 (m, 5H), 2.96 (s, 1H), 1.73 (s, 3H), 1.52 (s, 3H);  $^{13}\text{C}$  NMR (100 MHz,  $\text{CDCl}_3$ ):  $\delta$  167.1, 159.4, 153.9, 149.9, 128.6, 128.4, 127.7, 126.6, 123.9, 122.8, 120.7, 111.0, 105.0, 79.6, 67.6, 52.0, 48.6, 25.9, 18.0; HRMS (ESI<sup>+</sup>)  $[\text{M}+\text{NH}_4]^+$ : Calcd for:  $\text{C}_{21}\text{H}_{26}\text{NO}_5$ : 372.1805 m/z, found: 372.1800 m/z; Specific rotation:  $[\alpha]_{\text{D}}^{20}$  -45.9 ( $c$  1.00,  $\text{CHCl}_3$ ) for an enantiomerically enriched sample of >99:1 e.r.

Enantiomeric purity of **3g-oxi** was determined by HPLC analysis in comparison with authentic racemic material (>99:1 e.r. shown; Chiralcel OZ-H column, 95:5 hexanes/ *i*PrOH, 0.8 mL/min, 254 nm).

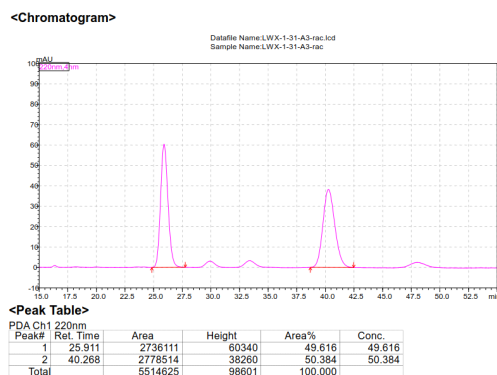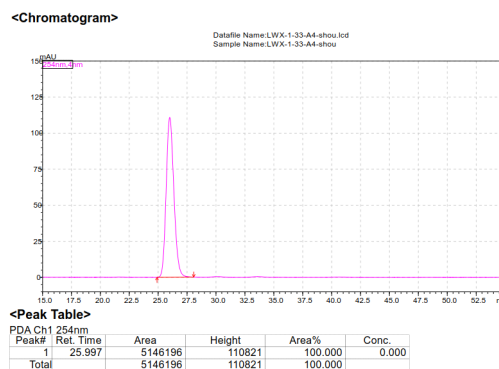

| Peak # | Time (min) | Area (%) | Peak # | Time (min) | Area (%) |
|--------|------------|----------|--------|------------|----------|
| 1      | 25.911     | 49.616   | 1      | 25.997     | >99.000  |
| 2      | 40.268     | 50.384   | 2      |            | <1.000   |

**(4*S*,5*S*)-5-([1,1'-Biphenyl]-4-yl)-4-(benzofuran-2-yl)-4,5-dimethyl-1,2-oxaborolan-2-ol (3h).**  
**Yield:** (66.5 mg, 87%); **IR (neat):** 3378 (br), 3030 (w), 2978 (w), 1575 (w), 1519 (m), 1452 (s), 1423 (s), 1397 (s), 1302 (m), 1255 (s), 1170 (m), 1078 (m), 1051 (m), 1007 (m), 914 (m), 803 (m), 750 (s), 738 (s), 695 (s)  $\text{cm}^{-1}$ ;  **$^1\text{H NMR}$  (400 MHz,  $\text{CDCl}_3$ ):**  $\delta$  7.42 (d,  $J = 7.6$  Hz, 2H), 7.37 (t,  $J = 7.4$  Hz, 2H), 7.34 - 7.27 (m, 3H), 7.24 (d,  $J = 7.6$  Hz, 1H), 7.19 - 7.06 (m, 4H), 6.14 (s, 1H), 5.89 (s, 1H), 1.89 (s, 1H), 1.73 (d,  $J = 16.4$  Hz, 1H), 1.67 (s, 2H), 1.31 (d,  $J = 16.4$  Hz, 1H);  **$^{13}\text{C NMR}$  (100 MHz,  $\text{CDCl}_3$ ):**  $\delta$  162.0, 154.3, 143.0, 140.7, 139.3, 128.6, 128.2, 127.1, 126.9, 126.1, 124.9, 123.4, 122.3, 120.4, 110.7, 102.8, 89.4, 50.6, 24.9, 23.0; **HRMS ( $\text{ESI}^+$ ) [ $\text{M}+\text{H}$ ] $^+$ :** Calcd for:  $\text{C}_{25}\text{H}_{24}\text{BO}_3$ : 382.1849  $m/z$ , found: 382.1853  $m/z$ ; Specific rotation:  $[\alpha]_{\text{D}}^{20}$  -35.2 ( $c$  1.00,  $\text{CHCl}_3$ ) for an enantiomerically enriched sample of >99:1 e.r.

**(2*S*,3*S*)-3-([1,1'-Biphenyl]-4-yl)-2-(benzofuran-2-yl)-2-methylbutane-1,3-diol (3h-oxi).**  
**Yield:** (58.9 mg, 91%); **IR (neat):** 3237 (br), 2977 (w), 2920 (w), 1573 (m), 1485 (m), 1451 (s), 1369 (m), 1253 (s), 1158 (s), 1103 (s), 1067 (s), 1023 (s), 940 (m), 842 (m), 768 (m), 748 (s), 698 (s)  $\text{cm}^{-1}$ ;  **$^1\text{H NMR}$  (400 MHz,  $\text{CDCl}_3$ ):**  $\delta$  7.57 (d,  $J = 8.0$  Hz, 2H), 7.48 (d,  $J = 7.6$  Hz, 1H), 7.42 (t,  $J = 7.4$  Hz, 5H), 7.33 (t,  $J = 7.4$  Hz, 1H), 7.28 - 7.15 (m, 4H), 6.32 (s, 1H), 4.03 - 3.86 (m, 2H), 3.58 (s, 1H), 2.83 (s, 1H), 1.76 (s, 3H), 1.55 (s, 3H);  **$^{13}\text{C NMR}$  (100 MHz,  $\text{CDCl}_3$ ):**  $\delta$  159.9, 154.0, 143.6, 140.6, 139.5, 128.7, 127.9, 127.2, 126.9, 126.9, 125.8, 123.8, 122.7, 120.7, 111.0, 105.0, 79.5, 67.7, 49.0, 26.2, 18.0; **HRMS ( $\text{ESI}^+$ ) [ $\text{M}+\text{NH}_4$ ] $^+$ :** Calcd for:  $\text{C}_{25}\text{H}_{28}\text{NO}_3$ : 390.2064  $m/z$ , found: 390.2064  $m/z$ ; Specific rotation:  $[\alpha]_{\text{D}}^{20}$  -57.1 ( $c$  1.00,  $\text{CHCl}_3$ ) for an enantiomerically enriched sample of >99:1 e.r.

Enantiomeric purity of **3h-oxi** was determined by HPLC analysis in comparison with authentic racemic material (>99:1 e.r. shown; Chiralcel OZ-H column, 97:3 hexanes/ *i*PrOH, 0.8 mL/min, 254 nm).

&lt;Chromatogram&gt;

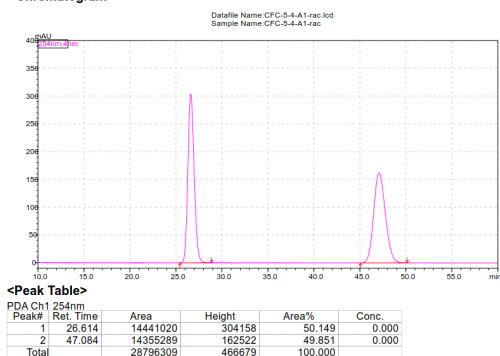

&lt;Chromatogram&gt;

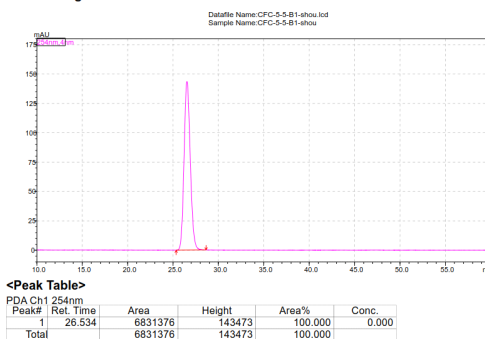

| Peak # | Time (min) | Area (%) | Peak # | Time (min) | Area (%) |
|--------|------------|----------|--------|------------|----------|
| 1      | 26.614     | 50.149   | 1      | 26.534     | >99.000  |
| 2      | 47.084     | 49.851   | 2      |            | <1.000   |

**(4*S*,5*S*)-4-(Benzofuran-2-yl)-5-(4-methoxyphenyl)-4,5-dimethyl-1,2-oxaborolan-2-ol (3i).** Yield: (59.8 mg, 89%); IR (neat): 3361 (br), 2935 (m), 2835 (w), 1581 (m), 1507 (m), 1425 (m), 1377 (m), 1288 (s), 1245 (s), 1177 (s), 1068 (s), 1031 (s), 907 (m), 854 (m), 749 (s)  $\text{cm}^{-1}$ ;  $^1\text{H}$  NMR (400 MHz,  $\text{CDCl}_3$ ):  $\delta$  7.35 - 7.28 (m, 2H), 7.20 - 7.07 (m, 2H), 6.96 (d,  $J = 8.2$  Hz, 2H), 6.53 (d,  $J = 8.2$  Hz, 2H), 6.25 - 5.95 (m, 2H), 3.63 (s, 3H), 1.82 (s, 3H), 1.63 - 1.55 (m, 4H), 1.24 (d,  $J = 16.4$  Hz, 1H);  $^{13}\text{C}$  NMR (100 MHz,  $\text{CDCl}_3$ ):  $\delta$  161.7, 154.3, 143.1, 130.4, 128.0, 126.3, 123.6, 122.4, 120.7, 120.5, 110.7, 102.8, 89.1, 50.4, 24.9, 22.8; HRMS (ESI<sup>+</sup>) [ $\text{M}+\text{H}$ ]<sup>+</sup>: Calcd for:  $\text{C}_{20}\text{H}_{22}\text{BO}_4$ : 336.1642 m/z, found: 336.1646 m/z; Specific rotation:  $[\alpha]_{\text{D}}^{20}$  -37.5 ( $c$  1.00,  $\text{CHCl}_3$ ) for an enantiomerically enriched sample of >99:1 e.r.

**(2*S*,3*S*)-2-(Benzofuran-2-yl)-3-(4-methoxyphenyl)-2-methylbutane-1,3-diol (3i-oxi).** Yield: (55.0 mg, 93%); IR (neat): 3242 (br), 2993 (w), 2838 (w), 1610 (m), 1574 (m), 1511 (s), 1452 (s), 1301 (m), 1248 (s), 1177 (m), 1024 (s), 940 (m), 884 (m), 801 (m), 735 (s), 683 (m)  $\text{cm}^{-1}$ ;  $^1\text{H}$  NMR (400 MHz,  $\text{CDCl}_3$ ):  $\delta$  7.48 (d,  $J = 7.4$  Hz, 1H), 7.42 (d,  $J = 8.0$  Hz, 1H), 7.29 - 7.16 (m, 2H), 7.04 (d,  $J = 8.4$  Hz, 2H), 6.72 (d,  $J = 8.5$  Hz, 2H), 6.28 (s, 1H), 3.98 - 3.84 (m, 2H), 3.77 (s, 3H), 3.47 (s, 1H), 2.88 (s, 1H), 1.70 (s, 3H), 1.50 (s, 3H);  $^{13}\text{C}$  NMR (100 MHz,  $\text{CDCl}_3$ ):  $\delta$  160.1, 158.3, 154.0, 136.7, 128.0, 127.6, 123.7, 122.7, 120.6, 112.4, 111.0, 104.9, 79.3, 67.7, 55.1, 49.0, 26.3, 17.9; HRMS (ESI<sup>+</sup>) [ $\text{M}-\text{OH}$ ]<sup>+</sup>: Calcd for  $\text{C}_{20}\text{H}_{21}\text{O}_3$ : 309.1485 m/z, found: 309.1483 m/z; Specific rotation:  $[\alpha]_{\text{D}}^{20}$  -32.9 ( $c$  1.00,  $\text{CHCl}_3$ ) for an enantiomerically enriched sample of >99:1 e.r.

Enantiomeric purity of **3i-oxi** was determined by HPLC analysis in comparison with authentic racemic material (>99:1 e.r. shown; Chiralcel OZ-H column, 95:5 hexanes/ *i*PrOH, 0.8 mL/min, 254 nm).

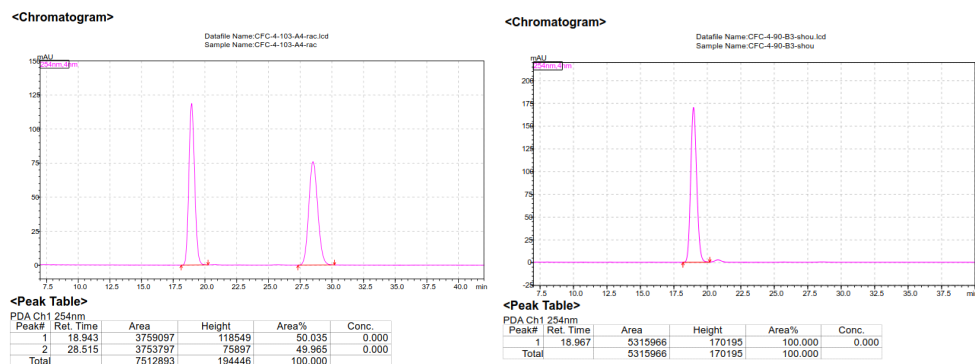

| Peak # | Time (min) | Area (%) | Peak # | Time (min) | Area (%) |
|--------|------------|----------|--------|------------|----------|
| 1      | 18.943     | 50.035   | 1      | 18.967     | >99.000  |
| 2      | 28.515     | 49.965   | 2      |            | <1.000   |

**(4*S*,5*S*)-4-(Benzofuran-2-yl)-4,5-dimethyl-5-(*o*-tolyl)-1,2-oxaborolan-2-ol (3j).** Yield: (53.8 mg, 84%); **IR (neat):** 3360 (br), 2961 (m), 2854 (m), 1453 (s), 1423 (m), 1307 (m), 1257 (s), 1170 (w), 1095 (m), 1048 (m), 923 (w), 802 (s), 752 (s), 690 (w)  $\text{cm}^{-1}$ ;  **$^1\text{H}$  NMR (400 MHz,  $\text{CDCl}_3$ ):**  $\delta$  7.29 (d,  $J = 7.4$  Hz, 1H), 7.18 (t,  $J = 8.2$  Hz, 2H), 7.14 - 7.03 (m, 2H), 7.00 - 6.88 (m, 2H), 6.75 (d,  $J = 7.4$  Hz, 1H), 6.04 (s, 1H), 5.39 (s, 1H), 2.22 (s, 3H), 1.82 (s, 3H), 1.71 (s, 3H), 1.63 (d,  $J = 16.6$  Hz, 1H), 1.37 (d,  $J = 16.6$  Hz, 1H);  **$^{13}\text{C}$  NMR (100 MHz,  $\text{CDCl}_3$ ):**  $\delta$  162.8, 154.1, 141.3, 135.4, 132.5, 128.1, 126.5, 126.3, 124.8, 123.2, 122.1, 120.2, 110.5, 102.3, 92.1, 51.4, 27.1, 23.1, 23.0; **HRMS (ESI $^+$ ) [M+H] $^+$ :** Calcd for:  $\text{C}_{20}\text{H}_{22}\text{BO}_3$ : 320.1693 m/z, found: 320.1690 m/z; Specific rotation:  $[\alpha]_{\text{D}}^{20}$  69.3 ( $c$  1.00,  $\text{CHCl}_3$ ) for an enantiomerically enriched sample of >99:1 e.r.

**(2*S*,3*S*)-2-(Benzofuran-2-yl)-2-methyl-3-(*o*-tolyl)butane-1,3-diol (3j-oxi).** Yield: (47.9 mg, 92%); **IR (neat):** 3188 (br), 2953 (w), 1565 (w), 1447 (s), 1371 (m), 1271 (m), 1170 (m), 1084 (m), 1023 (s), 936 (m), 832 (m), 815 (m), 748 (s), 656 (m)  $\text{cm}^{-1}$ ;  **$^1\text{H}$  NMR (400 MHz,  $\text{CDCl}_3$ ):**  $\delta$  7.48 (d,  $J = 7.2$  Hz, 1H), 7.38 (d,  $J = 7.8$  Hz, 1H), 7.28 - 7.17 (m, 2H), 7.14 - 7.05 (m, 2H), 7.02 (t,  $J = 7.6$  Hz, 2H), 6.33 (s, 1H), 4.06 - 3.94 (m, 2H), 3.36 (s, 1H), 2.94 (s, 1H), 2.06 (s, 3H), 1.83 (s, 3H), 1.50 (s, 3H);  **$^{13}\text{C}$  NMR (100 MHz,  $\text{CDCl}_3$ ):**  $\delta$  160.3, 154.0, 141.9, 137.0, 132.5, 128.9, 128.1, 127.0, 124.6, 123.8, 122.7, 120.6, 111.0, 105.0, 82.3, 67.8, 49.6, 28.5, 23.1, 18.3; **HRMS (ESI $^+$ ) [M+NH $_4$ ] $^+$ :** Calcd for:  $\text{C}_{20}\text{H}_{26}\text{NO}_3$ : 328.1907 m/z, found: 328.1910 m/z; Specific rotation:  $[\alpha]_{\text{D}}^{20}$  -33.4 ( $c$  1.00,  $\text{CHCl}_3$ ) for an enantiomerically enriched sample of >99:1 e.r.

Enantiomeric purity of **3j-oxi** was determined by HPLC analysis in comparison with authentic racemic material (>99:1 e.r. shown; Chiralcel OZ-H column, 97:3 hexanes/ *i*PrOH, 0.8 mL/min, 254 nm).

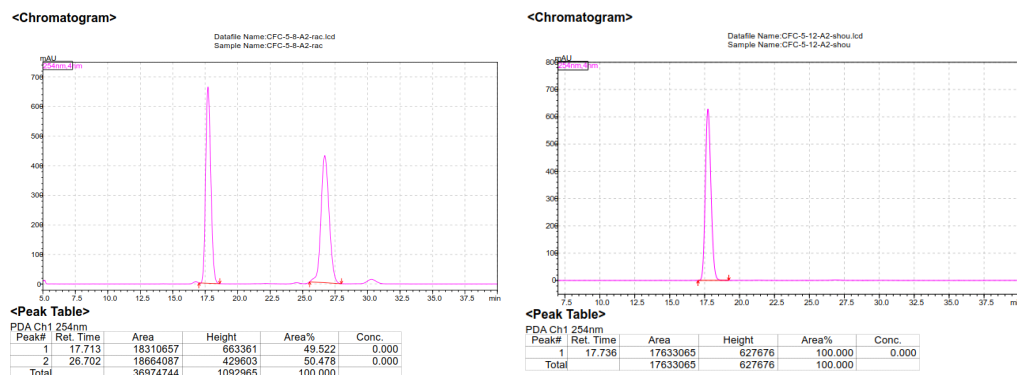

| Peak # | Time (min) | Area (%) | Peak # | Time (min) | Area (%) |
|--------|------------|----------|--------|------------|----------|
| 1      | 17.713     | 49.522   | 1      | 17.736     | >99.000  |
| 2      | 26.702     | 50.478   | 2      |            | <1.000   |

**(4*S*,5*S*)-4-(Benzofuran-2-yl)-4,5-dimethyl-5-(naphthalen-2-yl)-1,2-oxaborolan-2-ol (3k).** Yield: (60.9 mg, 88%); IR (neat): 3344 (br), 2926 (w), 2930 (w), 1573 (w), 1439 (s), 1408 (m), 1381 (m), 1283 (s), 1254 (s), 1168 (m), 1087 (m), 1040 (m), 942 (m), 878 (m), 799 (s), 738 (s), 714 (m)  $\text{cm}^{-1}$ ;  $^1\text{H NMR}$  (400 MHz,  $\text{CDCl}_3$ ):  $\delta$  7.67 - 7.56 (m, 3H), 7.39 - 7.31 (m, 3H), 7.29 - 7.19 (m, 2H), 7.14 (t,  $J = 7.6$  Hz, 1H), 7.07 (t,  $J = 7.4$  Hz, 1H), 7.00 (d,  $J = 8.8$  Hz, 1H), 6.04 (s, 1H), 5.86 (s, 1H), 1.94 (s, 1H), 1.72 - 1.62 (m, 1H), 1.26 (d,  $J = 16.6$ , 1H);  $^{13}\text{C NMR}$  (100 MHz,  $\text{CDCl}_3$ ):  $\delta$  161.8, 154.3, 141.6, 132.6, 132.1, 128.1, 127.1, 126.8, 125.7, 125.5, 123.3, 123.2, 123.1, 122.2, 120.4, 110.6, 102.9, 89.5, 50.4, 25.0, 23.1; HRMS (ESI<sup>+</sup>) [M+H]<sup>+</sup>: Calcd for:  $\text{C}_{23}\text{H}_{22}\text{BO}_3$ : 356.1693 m/z, found: 356.1703 m/z; Specific rotation:  $[\alpha]_{\text{D}}^{20}$  -114.0 ( $c$  1.00,  $\text{CHCl}_3$ ) for an enantiomerically enriched sample of >99:1 e.r.

**(2*S*,3*S*)-2-(Benzofuran-2-yl)-2-methyl-3-(naphthalen-2-yl)butane-1,3-diol (3k-oxi).** Yield: (56.6 mg, 93%); IR (neat): 3326 (br), 2980 (m), 2939 (m), 1711 (m), 1571 (m), 1452 (s), 1374 (s), 1273 (s), 1194 (m), 1126 (m), 1027 (s), 938 (m), 856 (m), 819 (s), 741 (s)  $\text{cm}^{-1}$ ;  $^1\text{H NMR}$  (400 MHz,  $\text{CDCl}_3$ ):  $\delta$  7.77 (d,  $J = 7.6$  Hz, 1H), 7.73 - 7.65 (m, 2H), 7.59 (d,  $J = 8.8$  Hz, 1H), 7.49 - 7.36 (m, 4H), 7.31 - 7.18 (m, 2H), 7.10 (d,  $J = 8.8$  Hz, 1H), 6.24 (s, 1H), 3.97 (d,  $J = 10.8$  Hz, 1H), 3.89 (d,  $J = 11.0$  Hz, 1H), 3.83 (s, 1H), 3.01 (s, 1H), 1.82 (s, 3H), 1.58 (s, 3H);  $^{13}\text{C NMR}$  (100 MHz,  $\text{CDCl}_3$ ):  $\delta$  159.8, 154.0, 142.1, 132.5, 132.2, 128.2, 127.9, 127.2, 126.4, 125.8, 125.8, 125.38, 124.9, 123.8, 122.7, 120.7, 111.0, 105.0, 79.8, 67.6, 48.8, 26.3, 18.0; HRMS (ESI<sup>+</sup>) [M+NH<sub>4</sub>]<sup>+</sup>: Calcd for  $\text{C}_{23}\text{H}_{26}\text{NO}_3$ : 364.1907 m/z, found: 364.1906 m/z; Specific rotation:  $[\alpha]_{\text{D}}^{20}$  -71.4 ( $c$  1.00,  $\text{CHCl}_3$ ) for an enantiomerically enriched sample of >99:1 e.r.

Enantiomeric purity of **3k-oxi** was determined by HPLC analysis in comparison with authentic racemic material (>99:1 e.r. shown; Chiralcel OZ-H column, 97:3 hexanes/ *i*PrOH, 0.8 mL/min, 254 nm).

&lt;Chromatogram&gt;

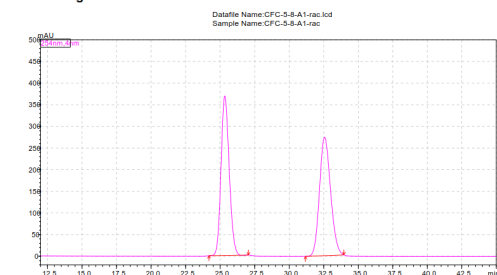

&lt;Peak Table&gt;

| Peak# | Ret. Time | Area     | Height | Area%   | Conc. |
|-------|-----------|----------|--------|---------|-------|
| 1     | 25.337    | 15118799 | 368174 | 49.768  | 0.000 |
| 2     | 32.565    | 15259776 | 273542 | 50.232  | 0.000 |
| Total |           | 30378574 | 641716 | 100.000 |       |

&lt;Chromatogram&gt;

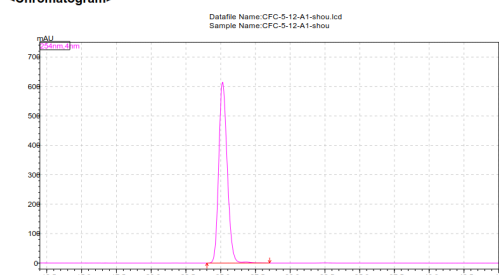

&lt;Peak Table&gt;

| Peak# | Ret. Time | Area     | Height | Area%   | Conc. |
|-------|-----------|----------|--------|---------|-------|
| 1     | 25.136    | 26124207 | 613747 | 100.000 | 0.000 |
| Total |           | 26124207 | 613747 | 100.000 |       |

| Peak # | Time (min) | Area (%) | Peak # | Time (min) | Area (%) |
|--------|------------|----------|--------|------------|----------|
| 1      | 25.337     | 49.768   | 1      | 25.136     | >99.000  |
| 2      | 32.565     | 50.232   | 2      |            | <1.000   |

**(4*S*,5*S*)-4-(Benzofuran-2-yl)-5-(furan-2-yl)-4,5-dimethyl-1,2-oxaborolan-2-ol (3l).** Yield: (26.0 mg, 44%); **IR (neat):** 3366 (br), 2963 (m), 2926 (m), 1452 (s), 1400 (s), 1337 (m), 1257 (s), 1169 (m), 1094 (m), 1057 (m), 933 (w), 797 (s), 739 (s), 698 (s)  $\text{cm}^{-1}$ ;  **$^1\text{H}$  NMR (400 MHz,  $\text{CDCl}_3$ ):**  $\delta$  7.38 (d,  $J = 7.6$  Hz, 1H), 7.31 (d,  $J = 8.2$  Hz, 1H), 7.20 - 7.08 (m, 2H), 7.05 (s, 1H), 6.24 (s, 1H), 6.02 - 5.96 (m, 1H), 5.88 (d,  $J = 3.2$  Hz, 1H), 5.39 (s, 1H), 2.01 (d,  $J = 16.4$  Hz, 1H), 1.80 (s, 3H), 1.54 (s, 3H), 1.20 (d,  $J = 16.4$  Hz, 1H);  **$^{13}\text{C}$  NMR (100 MHz,  $\text{CDCl}_3$ ):**  $\delta$  161.9, 156.6, 154.7, 141.3, 128.3, 123.3, 122.2, 120.3, 110.7, 109.9, 105.4, 101.7, 85.8, 49.8, 23.4, 21.9; **HRMS (ESI $^+$ ) [M+H] $^+$ :** Calcd for:  $\text{C}_{17}\text{H}_{18}\text{BO}_4$ : 296.1329 m/z, found: 296.1324 m/z; Specific rotation:  $[\alpha]_{\text{D}}^{20} -108.6$  ( $c$  1.00,  $\text{CHCl}_3$ ) for an enantiomerically enriched sample of >99:1 e.r.

**(2*S*,3*S*)-2-(Benzofuran-2-yl)-3-(furan-2-yl)-2-methylbutane-1,3-diol (3l-oxi).** Yield: (24.2 mg, 96%); **IR (neat):** 3305 (br), 2921 (m), 2851 (w), 1490 (w), 1444 (m), 1430 (m), 1373 (m), 1236 (m), 1157 (m), 1089 (m), 1041 (s), 999 (m), 921 (m), 824 (m), 742 (s), 699 (s)  $\text{cm}^{-1}$ ;  **$^1\text{H}$  NMR (400 MHz,  $\text{CDCl}_3$ ):**  $\delta$  7.50 (d,  $J = 7.4$  Hz, 1H), 7.40 (d,  $J = 8.0$  Hz, 1H), 7.29 - 7.13 (m, 3H), 6.45 (s, 1H), 6.27 (s, 1H), 6.09 (d,  $J = 2.4$  Hz, 1H), 4.12 - 3.97 (m, 2H), 3.53 (s, 1H), 2.40 (s, 1H), 1.60 (s, 3H), 1.52 (s, 3H);  **$^{13}\text{C}$  NMR (100 MHz,  $\text{CDCl}_3$ ):**  $\delta$  159.8, 157.5, 141.2, 128.1, 123.8, 122.7, 120.7, 110.9, 110.1, 106.5, 104.7, 76.9, 67.5, 49.3, 23.7, 17.5; **HRMS (ESI $^+$ ) [M+NH $_4$ ] $^+$ :** Calcd for:  $\text{C}_{17}\text{H}_{22}\text{NO}_4$ : 304.1543 m/z, found: 304.1543 m/z; Specific rotation:  $[\alpha]_{\text{D}}^{20} -0.2$  ( $c$  1.00,  $\text{CHCl}_3$ ) for an enantiomerically enriched sample of >99:1 e.r.

Enantiomeric purity of **3l-oxi** was determined by HPLC analysis in comparison with authentic racemic material (>99:1 e.r. shown; Chiralcel IC column, 97:3 hexanes/ *i*PrOH, 0.8 mL/min, 254 nm).

&lt;Chromatogram&gt;

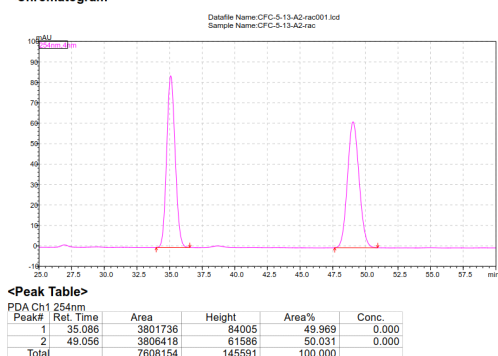

&lt;Chromatogram&gt;

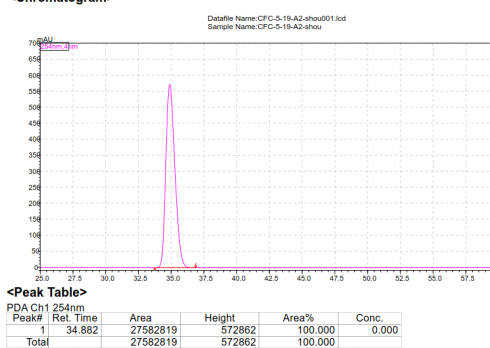

| Peak # | Time (min) | Area (%) | Peak # | Time (min) | Area (%) |
|--------|------------|----------|--------|------------|----------|
| 1      | 35.086     | 49.969   | 1      | 34.882     | >99.000  |
| 2      | 49.056     | 50.031   | 2      |            | <1.000   |

**(4*S*,5*S*)-4,5-Di(benzofuran-2-yl)-4,5-dimethyl-1,2-oxaborolan-2-ol (3*m*).** Yield: (44.3 mg, 64%); IR (neat): 3340 (br), 3020 (w), 2978 (m), 1430 (m), 1356 (m), 1287 (m), 1155 (m), 1078 (s), 1002 (m), 946 (s), 845 (m), 814 (m), 730 (s), 716 (m), 686 (m)  $\text{cm}^{-1}$ ;  $^1\text{H NMR}$  (400 MHz,  $\text{CDCl}_3$ ):  $\delta$  7.34 - 7.22 (m, 2H), 7.15 - 6.96 (m, 6H), 6.34 (s, 1H), 6.24 (s, 1H), 5.50 (s, 1H), 2.02 (d,  $J = 16.4$  Hz, 1H), 1.88 (s, 3H), 1.62 (s, 3H), 1.25 (d,  $J = 16.4$  Hz, 1H);  $^{13}\text{C NMR}$  (100 MHz,  $\text{CDCl}_3$ ):  $\delta$  161.5, 159.6, 154.6, 154.5, 128.1, 127.8, 123.6, 123.3, 122.3, 122.1, 120.6, 120.4, 110.7, 110.6, 102.2, 102.1, 86.1, 49.8, 23.3, 22.0; HRMS ( $\text{ESI}^+$ )  $[\text{M}+\text{H}]^+$ : Calcd for  $\text{C}_{21}\text{H}_{20}\text{BO}_4$ : 346.1485  $m/z$ , found: 346.1492  $m/z$ ; Specific rotation:  $[\alpha]_{\text{D}}^{20} -85.5$  ( $c$  1.00,  $\text{CHCl}_3$ ) for an enantiomerically enriched sample of >99:1 e.r.

**(2*S*,3*S*)-2,3-Di(benzofuran-2-yl)-2-methylbutane-1,3-diol (3*m-oxi*).** Yield: (40.0 mg, 93%); IR (neat): 3284 (br), 3122 (w), 3063 (w), 1577 (w), 1472 (s), 1419 (m), 1288 (m), 1252 (s), 1205 (m), 1160 (m), 1082 (m), 1023 (s), 957 (m), 883 (m), 809 (s), 750 (s), 732 (s), 669 (m)  $\text{cm}^{-1}$ ;  $^1\text{H NMR}$  (400 MHz,  $\text{CDCl}_3$ ): 7.48 (d,  $J = 5.6$  Hz, 2H), 7.35 (d,  $J = 7.8$  Hz, 1H), 7.26 - 7.14 (m, 5H), 6.52 (s, 1H), 6.48 (s, 1H), 4.18 - 4.04 (m, 2H), 3.84 (s, 1H), 2.46 (s, 1H), 1.70 (s, 3H), 1.59 (s, 3H);  $^{13}\text{C NMR}$  (100 MHz,  $\text{CDCl}_3$ ): 160.5, 159.4, 154.3, 154.3, 128.0, 123.8, 123.8, 122.7, 122.7, 120.9, 120.7, 111.0, 110.9, 105.0, 103.5, 77.1, 67.4, 49.2, 23.8, 17.5; HRMS ( $\text{ESI}^+$ )  $[\text{M}+\text{NH}_4]^+$ : Calcd for:  $\text{C}_{21}\text{H}_{24}\text{NO}_4$ : 354.1700  $m/z$ , found: 354.1697  $m/z$ ; Specific rotation:  $[\alpha]_{\text{D}}^{20} 7.8$  ( $c$  1.00,  $\text{CHCl}_3$ ) for an enantiomerically enriched sample of >99:1 e.r.

Enantiomeric purity of **3*m-oxi*** was determined by HPLC analysis in comparison with authentic racemic material (>99:1 e.r. shown; Chiralcel OZ-H column, 97:3 hexanes/ *i*PrOH, 0.8 mL/min, 254 nm).



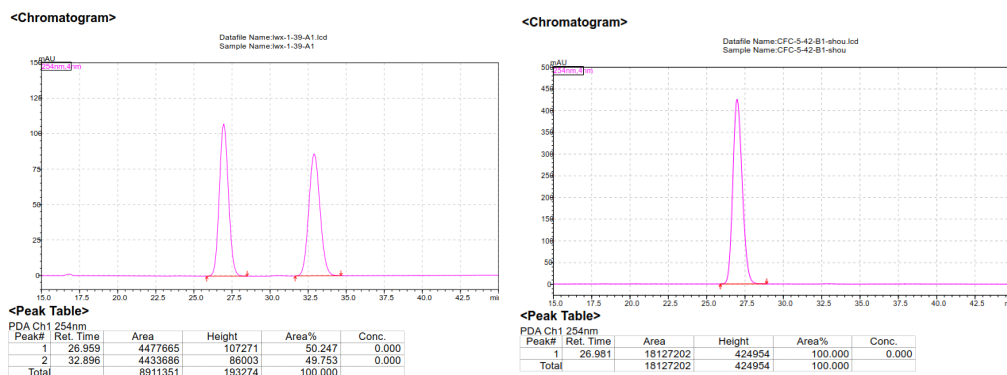

| Peak # | Time (min) | Area (%) | Peak # | Time (min) | Area (%) |
|--------|------------|----------|--------|------------|----------|
| 1      | 26.959     | 50.247   | 1      | 26.981     | >99.000  |
| 2      | 32.896     | 49.753   | 2      |            | <1.000   |

**(4*S*,5*S*)-4-(Benzofuran-2-yl)-4,5-dimethyl-5-(thiophen-3-yl)-1,2-oxaborolan-2-ol (3n).** Yield: (46.2 mg, 74%); **IR (neat):** 3385 (br), 2972 (w), 2926 (w), 1481 (m), 1453 (s), 1431 (s), 1406 (m), 1284 (m), 1219 (m), 1151 (m), 1092 (m), 1030 (m), 940 (m), 883 (m), 783 (m), 745 (s), 632 (m)  $\text{cm}^{-1}$ ;  **$^1\text{H}$  NMR (400 MHz,  $\text{CDCl}_3$ ):**  $\delta$  7.48 - 7.31 (m, 2H), 7.23 - 7.09 (m, 2H), 6.93 - 6.82 (m, 2H), 6.43 (d,  $J = 4.8$  Hz, 1H), 6.21 - 6.09 (m, 2H), 1.84 (s, 3H), 1.70 (d,  $J = 16.4$  Hz, 1H), 1.59 (s, 1H), 1.23 (d,  $J = 16.4$  Hz, 1H);  **$^{13}\text{C}$  NMR (100 MHz,  $\text{CDCl}_3$ ):**  $\delta$  162.1, 154.4, 145.9, 128.2, 125.2, 124.7, 123.4, 122.3, 120.4, 119.3, 110.7, 102.5, 88.6, 49.8, 24.8, 23.1; **HRMS ( $\text{ESI}^+$ )  $[\text{M}+\text{H}]^+$ :** Calcd for:  $\text{C}_{17}\text{H}_{18}\text{BO}_3\text{S}$ : 312.1101  $m/z$ , found: 312.1097  $m/z$ ; Specific rotation:  $[\alpha]_{\text{D}}^{20} -108.6$  ( $c$  1.00,  $\text{CHCl}_3$ ) for an enantiomerically enriched sample of >99:1

**(2*S*,3*S*)-2-(Benzofuran-2-yl)-2-methyl-3-(thiophen-3-yl)butane-1,3-diol (3n-oxi).** Yield: (40.7 mg, 90%); **IR (neat):** 3207 (br), 2940 (w), 1567 (m), 1470 (s), 1407 (m), 1253 (m), 1237 (m), 1174 (m), 1136 (m), 1025 (s), 1006 (m), 954 (m), 891 (m), 828 (s), 812 (s), 747 (s), 696 (s)  $\text{cm}^{-1}$ ;  **$^1\text{H}$  NMR (400 MHz,  $\text{CDCl}_3$ ):**  $\delta$  7.50 (d,  $J = 7.4$  Hz, 1H), 7.42 (d,  $J = 8.0$  Hz, 1H), 7.29 - 7.16 (m, 2H), 7.14 - 7.06 (m, 1H), 6.97 (s, 1H), 6.66 (d,  $J = 5.0$  Hz, 1H), 6.33 (s, 1H), 4.04 - 3.85 (m, 2H), 3.74 (s, 1H), 3.01 (s, 1H), 1.66 (s, 3H), 1.53 (s, 3H);  **$^{13}\text{C}$  NMR (100 MHz,  $\text{CDCl}_3$ ):**  $\delta$  159.9, 154.0, 146.8, 127.9, 126.9, 124.1, 123.8, 122.7, 121.3, 120.7, 111.0, 104.7, 78.8, 67.6, 48.8, 26.4, 17.7; **HRMS ( $\text{ESI}^+$ )  $[\text{M}+\text{NH}_4]^+$ :** Calcd for:  $\text{C}_{17}\text{H}_{22}\text{NO}_3\text{S}$ : 320.1315  $m/z$ , found: 320.1315  $m/z$ ; Specific rotation:  $[\alpha]_{\text{D}}^{20} -30.4$  ( $c$  1.00,  $\text{CHCl}_3$ ) for an enantiomerically enriched sample of >99:1 e.r.

Enantiomeric purity of **3n-oxi** was determined by HPLC analysis in comparison with authentic racemic material (>99:1 e.r. shown; Chiralcel OZ-H column, 97:3 hexanes/ *i*PrOH, 0.8 mL/min, 254 nm).

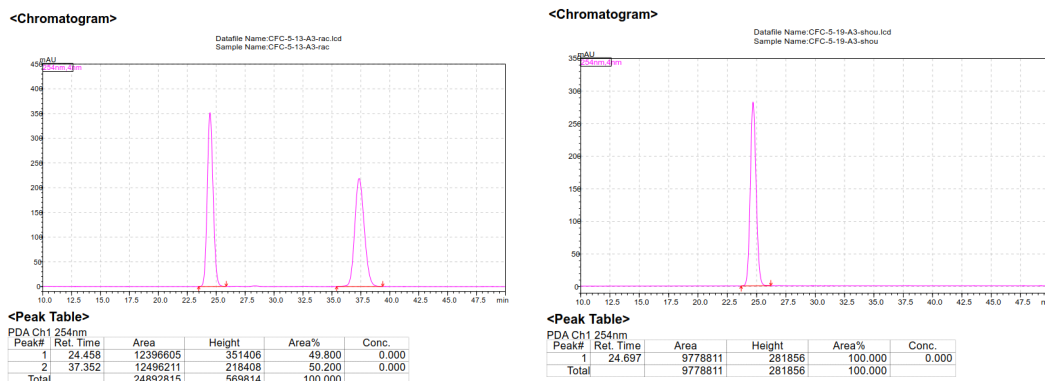

| Peak # | Time (min) | Area (%) | Peak # | Time (min) | Area (%) |
|--------|------------|----------|--------|------------|----------|
| 1      | 24.458     | 49.800   | 1      | 24.697     | >99.000  |
| 2      | 37.352     | 50.200   | 2      |            | <1.000   |

**(4*S*,5*S*)-5-(Benzo[*b*]thiophen-2-yl)-4-(benzofuran-2-yl)-4,5-dimethyl-1,2-oxaborolan-2-ol**

**(3o).** Yield: (52.8 mg, 73%); IR (neat): 3387 (br), 2956 (w), 2876 (m), 1476 (m), 1407 (s), 1376 (m), 1301 (m), 1230 (m), 1145 (m), 1067 (m), 956 (s), 021 (m), 845 (m), 801 (m), 745 (s), 667 (m) cm<sup>-1</sup>; <sup>1</sup>H NMR (400 MHz, CDCl<sub>3</sub>): δ 7.57 (d, *J* = 7.3 Hz, 1H), 7.47 - 7.31 (m, 3H), 7.23 - 7.07 (m, 4H), 6.73 (s, 1H), 6.25 (s, 1H), 5.50 (s, 1H), 1.95 (s, 3H), 1.83 (d, *J* = 16.4 Hz, 1H), 1.65 (s, 4H), 1.30 (d, *J* = 16.6 Hz, 1H); <sup>13</sup>C NMR (100 MHz, CDCl<sub>3</sub>): δ 161.6, 154.5, 149.7, 139.5, 139.0, 128.2, 123.8, 123.5, 123.1, 122.34, 121.8, 120.6, 119.4, 110.8, 103.2, 88.6, 50.5, 26.0, 23.5; HRMS (ESI<sup>+</sup>) [M+H]<sup>+</sup>: Calcd for: C<sub>21</sub>H<sub>22</sub>BO<sub>3</sub>S: 362.1257 m/z, found: 362.1254 m/z; Specific rotation: [α]<sub>D</sub><sup>20</sup> -89.1 (*c* 1.00, CHCl<sub>3</sub>) for an enantiomerically enriched sample of >99:1 e.r.

**(2*S*,3*S*)-3-(Benzo[*b*]thiophen-2-yl)-2-(benzofuran-2-yl)-2-methylbutane-1,3-diol (3o-oxi).**

Yield: (45.2 mg, 88%); IR (neat): 3333 (br), 2983 (w), 2937 (m), 1597 (w), 1452 (s), 1372 (m), 1305 (m), 1253 (s), 1169 (m), 1129 (m), 1028 (s), 936 (m), 883 (m), 830 (m), 742 (s), 689 (m) cm<sup>-1</sup>; <sup>1</sup>H NMR (400 MHz, CDCl<sub>3</sub>): 7.72 (d, *J* = 7.6 Hz, 1H), 7.61 (d, *J* = 7.2 Hz, 1H), 7.51 (d, *J* = 7.2 Hz, 1H), 7.44 (d, *J* = 8.2 Hz, 1H), 7.32 - 7.18 (m, 4H), 6.85 (s, 1H), 6.44 (s, 1H), 4.16 - 3.99 (m, 3H), 2.56 (s, 1H), 1.79 (s, 3H), 1.63 (s, 3H); <sup>13</sup>C NMR (100 MHz, CDCl<sub>3</sub>): δ 159.2, 154.2, 151.2, 139.6, 139.2, 127.9, 124.0, 123.9, 123.8, 123.3, 122.8, 121.9, 120.8, 120.8, 111.1, 105.4, 79.4, 67.7, 49.1, 27.5, 18.1; HRMS (ESI<sup>+</sup>) [M+NH<sub>4</sub>]<sup>+</sup>: Calcd for: C<sub>21</sub>H<sub>24</sub>NO<sub>3</sub>S: 370.1471 m/z, found: 370.1469 m/z; Specific rotation: [α]<sub>D</sub><sup>20</sup> -12.0 (*c* 1.00, CHCl<sub>3</sub>) for an enantiomerically enriched sample of >99:1 e.r.

Enantiomeric purity of **3o-oxi** was determined by HPLC analysis in comparison with authentic racemic material (>99:1 e.r. shown; Chiralcel OZ-H column, 97:3 hexanes/ *i*PrOH, 0.8 mL/min, 254 nm).

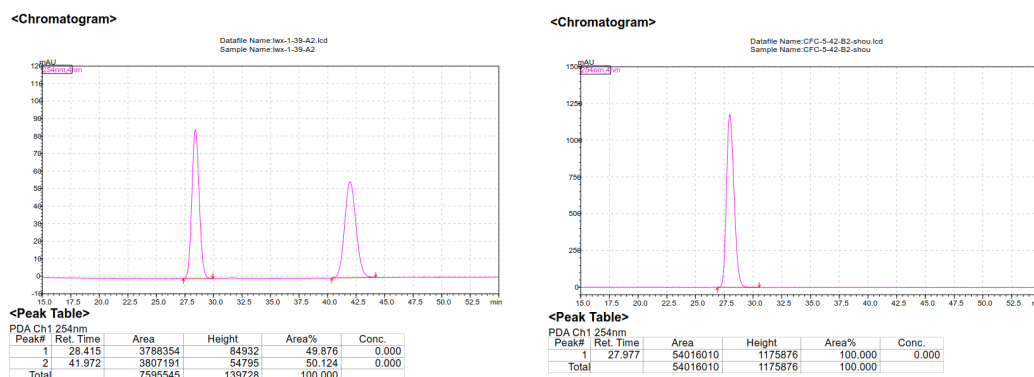

| Peak # | Time (min) | Area (%) | Peak # | Time (min) | Area (%) |
|--------|------------|----------|--------|------------|----------|
| 1      | 28.415     | 49.876   | 1      | 27.977     | >99.000  |
| 2      | 41.972     | 50.124   | 2      |            | <1.000   |

**(1*S*,4'*S*)-4'-(Benzofuran-2-yl)-4'-methyl-3,4-dihydro-2H-spiro[naphthalene-1,5'-[1,2]oxaborolan]-2'-ol (3p).** Yield: (54.4 mg, 82%); IR (neat): 3368 (br), 2955 (w), 2920 (m), 1488 (m), 1452 (m), 1414 (s), 1328 (m), 1288 (s), 1171 (m), 1079 (m), 1016 (m), 923 (m), 871 (m), 808 (s), 750 (s), 739 (s), 687 (m) cm<sup>-1</sup>; <sup>1</sup>H NMR (400 MHz, CDCl<sub>3</sub>): δ 7.31 (d, *J* = 7.2 Hz, 1H), 7.23 (d, *J* = 7.2 Hz, 1H), 7.17 - 6.92 (m, 5H), 6.79 (d, *J* = 6.8 Hz, 2H), 6.10 (s, 1H), 5.92 (s, 1H), 2.74 - 2.60 (m, 1H), 2.57 - 2.46 (m, 1H), 2.46 - 2.35 (m, 1H), 2.34 - 2.21 (m, 1H), 2.18 - 2.01 (m, 2H), 1.94 - 1.82 (m, 1H), 1.65 (s, 3H), 1.26 (d, *J* = 17.0 Hz, 1H); <sup>13</sup>C NMR (100 MHz, CDCl<sub>3</sub>): δ 162.3, 154.1, 138.9, 136.9, 128.6, 128.2, 127.0, 125.1, 124.8, 123.1, 122.1, 120.2, 110.4, 102.9, 87.6, 50.3, 33.1, 27.8, 24.3, 18.5; HRMS (ESI<sup>+</sup>) [M+H]<sup>+</sup>: Calcd for: C<sub>21</sub>H<sub>22</sub>BO<sub>3</sub>: 332.1693 m/z, found: 332.1693 m/z; Specific rotation: [α]<sub>D</sub><sup>20</sup> -85.6 (*c* 1.00, CHCl<sub>3</sub>) for an enantiomerically enriched sample of >99:1 e.r.

**(*S*)-1-((*S*)-2-(Benzofuran-2-yl)-1-hydroxypropan-2-yl)-1,2,3,4-tetrahydronaphthalen-1-ol (3p-oxi).** Yield: (46.3 mg, 85%); IR (neat): 3163 (br), 2932 (m), 2860 (w), 1556 (w), 1448 (s), 1338 (m), 1252 (s), 1168 (m), 1122 (m), 1039 (s), 1005 (s), 953 (m), 920 (m), 880 (m), 818 (m), 762 (s), 683 (m) cm<sup>-1</sup>; <sup>1</sup>H NMR (400 MHz, CDCl<sub>3</sub>): δ 7.47 (d, *J* = 7.2 Hz, 1H), 7.38 (d, *J* = 7.6 Hz, 1H), 7.28 - 7.13 (m, 4H), 7.11 - 6.98 (m, 2H), 6.20 (s, 1H), 4.06 (d, *J* = 11.2 Hz, 1H), 3.89 (d, *J* = 11.2 Hz, 1H), 3.68 (s, 1H), 3.28 (s, 1H), 2.67 - 2.50 (m, 1H), 2.37 - 2.26 (m, 1H), 2.24 - 2.14 (m, 1H), 2.01 - 1.90 (m, 1H), 1.68 - 1.42 (m, 5H); <sup>13</sup>C NMR (100 MHz, CDCl<sub>3</sub>): δ 160.1, 153.8, 139.4, 139.1, 128.2, 128.1, 127.7, 127.1, 125.4, 123.7, 122.7, 120.6, 111.0, 105.1, 77.9, 68.6, 49.4, 36.1, 30.0, 19.9, 17.0; HRMS (ESI<sup>+</sup>) [M-OH]<sup>+</sup>: Calcd for: C<sub>21</sub>H<sub>21</sub>O<sub>2</sub>: 305.1536 m/z, found: 305.1530 m/z; Specific rotation: [α]<sub>D</sub><sup>20</sup> 13.6 (*c* 1.00, CHCl<sub>3</sub>) for an enantiomerically enriched sample of >99:1 e.r.

Enantiomeric purity of **3p-oxi** was determined by HPLC analysis in comparison with authentic racemic material (>99:1 e.r. shown; Chiralcel OZ-H column, 95:5 hexanes/ *i*PrOH, 0.8 mL/min, 220 nm).

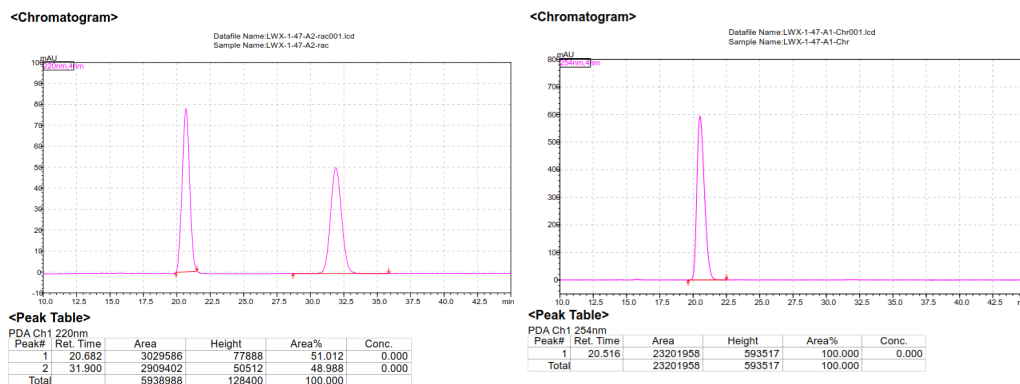

| Peak # | Time (min) | Area (%) | Peak # | Time (min) | Area (%) |
|--------|------------|----------|--------|------------|----------|
| 1      | 20.682     | 51.012   | 1      | 20.516     | >99.000  |
| 2      | 31.900     | 48.988   | 2      |            | <1.000   |

**(4*S*,5*S*)-4-(Benzofuran-2-yl)-5-cyclohexyl-4,5-dimethyl-1,2-oxaborolan-2-ol (3q).** Yield: (39.3 mg, 88%); **IR (neat):** 3350 (br), 2917 (m), 2840 (m), 1579 (m), 1448 (m), 1400 (m), 1267 (m), 1230 (s), 1156 (m), 1120 (m), 1020 (m), 910 (s), 884 (m), 831 (s), 745 (s), 684 (m)  $\text{cm}^{-1}$ ;  **$^1\text{H}$  NMR (400 MHz,  $\text{CDCl}_3$ ):**  $\delta$  7.50 (d,  $J = 7.2$  Hz, 1H), 7.43 (d,  $J = 7.4$  Hz, 1H), 7.28 - 7.13 (m, 3H), 6.49 (s, 1H), 5.50 (s, 1H), 1.72 - 1.58 (m, 2H), 1.55 - 1.38 (m, 6H), 1.36 - 1.17 (m, 6H), 1.09 - 0.94 (m, 3H), 0.87 - 0.66 (m, 2H);  **$^{13}\text{C}$  NMR (100 MHz,  $\text{CDCl}_3$ ):**  $\delta$  163.3, 154.4, 128.3, 123.4, 122.5, 120.4, 111.0, 102.6, 90.2, 49.0, 45.6, 28.7, 27.9, 26.9, 26.6, 26.4, 26.3, 24.4, 18.4; **HRMS (ESI $^+$ ) [M+H] $^+$ :** Calcd for:  $\text{C}_{19}\text{H}_{26}\text{BO}_3$ : 312.2006 m/z, found: 312.2002 m/z; Specific rotation:  $[\alpha]_{\text{D}}^{20} -30.8$  ( $c$  1.00,  $\text{CHCl}_3$ ) for an enantiomerically enriched sample of >99:1 e.r.

**(2*S*,3*S*)-2-(Benzofuran-2-yl)-3-cyclohexyl-2-methylbutane-1,3-diol (3q-oxi).** Yield: (34.6 mg, 91%); **IR (neat):** 3248 (br), 2978 (m), 2954 (m), 2931 (m), 1567 (m), 1450 (s), 1429 (m), 1358 (m), 1284 (m), 1249 (m), 1146 (m), 1021 (s), 954 (m), 920 (m), 875 (m), 812 (m), 747 (s), 687 (m)  $\text{cm}^{-1}$ ;  **$^1\text{H}$  NMR (400 MHz,  $\text{CDCl}_3$ ):**  $\delta$  7.53 (d,  $J = 7.2$  Hz, 1H), 7.45 (d,  $J = 7.6$  Hz, 1H), 7.28 - 7.16 (m, 2H), 6.64 (s, 1H), 4.12-4.06 (m, 2H), 2.81 (s, 1H), 2.57 (s, 1H), 1.82 - 1.51 (m, 7H), 1.48 (s, 3H), 1.26 (s, 3H), 1.10 - 0.91 (m, 4H);  **$^{13}\text{C}$  NMR (100 MHz,  $\text{CDCl}_3$ ):**  $\delta$  161.3, 154.1, 128.1, 123.7, 122.7, 120.6, 111.0, 104.5, 79.6, 68.2, 49.0, 46.0, 29.7, 27.4, 26.9, 26.8, 26.4, 19.7, 18.8; **HRMS (ESI $^+$ ) [M+Na] $^+$ :** Calcd for:  $\text{C}_{19}\text{H}_{26}\text{O}_3\text{Na}$ : 325.1774 m/z, found: 325.1771 m/z; Specific rotation:  $[\alpha]_{\text{D}}^{20} -2.3$  ( $c$  1.00,  $\text{CHCl}_3$ ) for an enantiomerically enriched sample of >99:1 e.r.

Enantiomeric purity of **3q-oxi** was determined by HPLC analysis in comparison with authentic racemic material (93:7 e.r. shown; Chiralcel IC column, 97:3 hexanes/ *i*PrOH, 0.8 mL/min, 254 nm).

&lt;Chromatogram&gt;

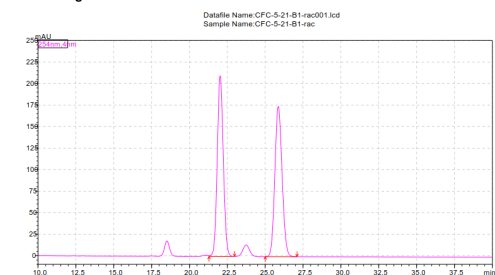

&lt;Peak Table&gt;

| Peak# | Ret. Time | Area     | Height | Area%   | Conc. |
|-------|-----------|----------|--------|---------|-------|
| 1     | 22.028    | 5821192  | 209626 | 50.064  | 0.000 |
| 2     | 25.866    | 5806270  | 174441 | 49.936  | 0.000 |
| Total |           | 11627462 | 384066 | 100.000 |       |

&lt;Chromatogram&gt;

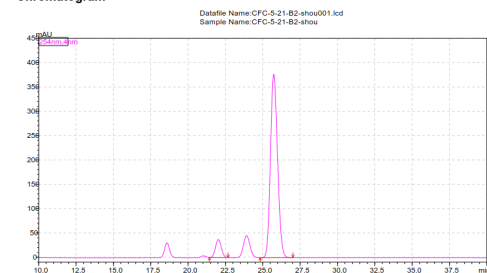

&lt;Peak Table&gt;

| Peak# | Ret. Time | Area     | Height | Area%   | Conc. |
|-------|-----------|----------|--------|---------|-------|
| 1     | 22.021    | 1005050  | 36816  | 7.464   | 0.000 |
| 2     | 25.733    | 12459498 | 376922 | 92.536  | 0.000 |
| Total |           | 13464548 | 413739 | 100.000 |       |

| Peak # | Time (min) | Area (%) | Peak # | Time (min) | Area (%) |
|--------|------------|----------|--------|------------|----------|
| 1      | 22.028     | 50.064   | 1      | 22.021     | 7.464    |
| 2      | 25.866     | 49.936   | 2      | 25.733     | 92.536   |

**(S)-4-(Benzofuran-2-yl)-4-methyl-1-oxa-2-borospiro[4,5]decan-2-ol (3r).** Yield: (54.5 mg, 96%); IR (neat): 3357 (br), 2930 (m), 2857 (w), 1579 (w), 1452 (m), 1402 (m), 1350 (m), 1287 (m), 1249 (s), 1134 (m), 1007 (m), 926 (m), 842 (m), 798 (s), 739 (s), 693 (m)  $\text{cm}^{-1}$ ;  $^1\text{H NMR}$  (400 MHz,  $\text{CDCl}_3$ ):  $\delta$  7.53 (d,  $J = 7.4$  Hz, 1H), 7.47 (d,  $J = 7.8$  Hz, 1H), 7.29 - 7.16 (m, 2H), 6.51 (s, 1H), 6.00 (s, 1H), 2.03 - 1.92 (m, 1H), 1.84 (d,  $J = 16.4$  Hz, 1H), 1.78 - 1.61 (m, 4H), 1.59 - 1.37 (m, 6H), 1.20 (d,  $J = 16.4$  Hz, 1H), 1.14 - 1.00 (m, 1H), 0.98 - 0.85 (m, 1H);  $^{13}\text{C NMR}$  (100 MHz,  $\text{CDCl}_3$ ):  $\delta$  163.4, 154.7, 128.4, 123.4, 122.5, 120.4, 111.0, 102.4, 87.2, 48.4, 34.0, 32.1, 25.2, 22.8, 22.4, 22.0; HRMS (ESI $^+$ )  $[\text{M}+\text{H}]^+$ : Calcd for:  $\text{C}_{17}\text{H}_{22}\text{BO}_3$ : 284.1693 m/z, found: 284.1690 m/z; Specific rotation:  $[\alpha]_{\text{D}}^{20}$   $-41.2$  ( $c$  1.00,  $\text{CHCl}_3$ ) for an enantiomerically enriched sample of >99:1 e.r.

**(S)-1-(2-(Benzofuran-2-yl)-1-hydroxypropan-2-yl)cyclohexan-1-ol (3r-oxi).** Yield: (48.9 mg, 93%); IR (neat): 3192 (br), 2978 (w), 2932 (m), 2849 (m), 1574 (w), 1450 (s), 1370 (m), 1279 (s), 1202 (m), 1129 (m), 1099 (m), 1034 (s), 929 (m), 844 (m), 747 (s), 733 (s), 676 (m)  $\text{cm}^{-1}$ ;  $^1\text{H NMR}$  (400 MHz,  $\text{CDCl}_3$ ):  $\delta$  7.53 (d,  $J = 7.2$  Hz, 1H), 7.45 (d,  $J = 7.6$  Hz, 1H), 7.29 - 7.13 (m, 2H), 6.66 (s, 1H), 4.10 - 3.98 (m, 2H), 2.99 (s, 1H), 2.53 (s, 1H), 1.90 - 1.72 (m, 2H), 1.67 - 1.47 (m, 7H), 1.45 (s, 3H), 1.40 - 1.31 (m, 1H);  $^{13}\text{C NMR}$  (100 MHz,  $\text{CDCl}_3$ ):  $\delta$  161.0, 154.2, 128.1, 123.6, 122.7, 120.6, 111.0, 104.8, 76.3, 67.4, 48.9, 32.9, 31.9, 25.5, 21.5, 17.2; HRMS (ESI $^+$ )  $[\text{M}+\text{Na}]^+$ : Calcd for:  $\text{C}_{17}\text{H}_{22}\text{O}_3\text{Na}$ : 297.1461 m/z, found: 297.1459 m/z; Specific rotation:  $[\alpha]_{\text{D}}^{20}$   $-3.3$  ( $c$  1.00,  $\text{CHCl}_3$ ) for an enantiomerically enriched sample of >99:1 e.r.

Enantiomeric purity of **3r-oxi** was determined by HPLC analysis in comparison with authentic racemic material (>99:1 e.r. shown; Chiralcel OZ-H column, 97:3 hexanes/ *i*PrOH, 0.8 mL/min, 254 nm).

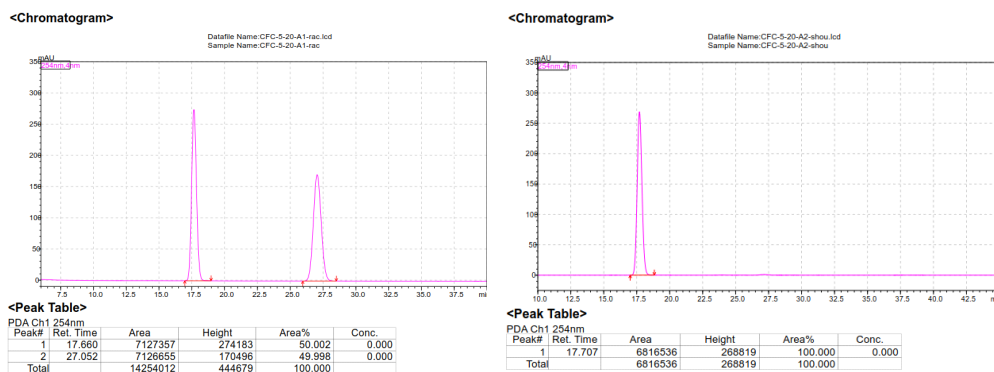

| Peak # | Time (min) | Area (%) | Peak # | Time (min) | Area (%) |
|--------|------------|----------|--------|------------|----------|
| 1      | 17.660     | 50.002   | 1      | 17.707     | >99.000  |
| 2      | 27.052     | 49.998   | 2      |            | <1.000   |

**(4*S*,5*S*)-4-(Benzofuran-2-yl)-4,5-dimethyl-5-((*E*)-2-(2,6,6-trimethylcyclohex-1-en-1-yl)vinyl)-1,2-oxaborolan-2-ol (3*s*).** Yield: (49.1 mg, 65%); IR (neat): 3364 (br), 2960 (w), 2926 (m), 1579 (w), 1452 (s), 1426 (m), 1401 (m), 1288 (m), 1254 (s), 1167 (m), 1077 (m), 1007 (m), 946 (m), 883 (s), 799 (s), 738 (s), 691 (m)  $\text{cm}^{-1}$ ;  $^1\text{H}$  NMR (400 MHz,  $\text{CDCl}_3$ ):  $\delta$  7.49 - 7.46 (m, 1H), 7.41 (d,  $J = 8.0$  Hz, 1H), 7.24 - 7.15 (m, 2H), 6.46 (s, 1H), 6.05 - 5.93 (m, 2H), 5.02 (d,  $J = 15.8$  Hz, 1H), 1.83 - 1.77 (m, 3H), 1.63 (s, 3H), 1.49 - 1.45 (m, 4H), 1.36 (s, 3H), 1.34 - 1.27 (m, 3H), 1.17 (d,  $J = 16.2$  Hz, 1H), 0.80 (s, 3H), 0.79 (s, 3H);  $^{13}\text{C}$  NMR (100 MHz,  $\text{CDCl}_3$ ):  $\delta$  162.9, 154.8, 136.7, 136.3, 128.5, 127.8, 125.6, 123.4, 122.4, 120.5, 111.0, 102.5, 87.6, 48.2, 39.1, 33.9, 32.3, 28.4, 28.3, 23.5, 23.2, 21.0, 19.1; HRMS ( $\text{ESI}^+$ )  $[\text{M}+\text{H}]^+$ : Calcd for:  $\text{C}_{24}\text{H}_{32}\text{BO}_3$ : 378.2475  $\text{m/z}$ , found: 378.2468  $\text{m/z}$ .

**(2*S*,3*S*,*E*)-2-(benzofuran-2-yl)-2,3-dimethyl-5-(2,6,6-trimethylcyclohex-1-en-1-yl)pent-4-ene-1,3-diol (3*s*-oxi).** Yield: (33.7 mg, 72%); IR (neat): 3335 (br), 2862 (m), 2826(w), 1572 (w), 1453 (s), 1374 (m), 1254 (s), 1165 (m), 1109 (m), 1030 (s), 977 (s), 938 (m), 911 (m), 847 (m), 810 (m), 739 (s), 661 (m)  $\text{cm}^{-1}$ ;  $^1\text{H}$  NMR (400 MHz,  $\text{CDCl}_3$ ):  $\delta$  7.52 (d,  $J = 7.6$  Hz, 1H), 7.42 (d,  $J = 8.0$  Hz, 1H), 7.28 - 7.15 (m, 2H), 6.61 (s, 1H), 6.15 (d,  $J = 16.0$  Hz, 1H), 5.58 (d,  $J = 16.0$  Hz, 1H), 4.19 (d,  $J = 11.0$  Hz, 1H), 4.00 (d,  $J = 11.0$  Hz, 1H), 2.97 (s, 1H), 2.68 (s, 1H), 1.93 (t,  $J = 6.2$  Hz, 2H), 1.66 - 1.48 (m, 8H), 1.46 - 1.38 (m, 2H), 1.35 (s, 3H), 0.98 - 0.86 (m, 6H);  $^{13}\text{C}$  NMR (100 MHz,  $\text{CDCl}_3$ ):  $\delta$  160.5, 154.3, 137.6, 137.0, 128.1, 128.0, 126.2, 123.7, 122.7, 120.6, 111.0, 104.5, 78.2, 67.9, 48.2, 39.3, 34.0, 32.6, 28.7, 28.5, 25.1, 21.3, 19.2, 17.2; HRMS ( $\text{ESI}^+$ )  $[\text{M}-\text{OH}]^+$ : Calcd for :  $\text{C}_{24}\text{H}_{31}\text{O}_2$ : 351.2319  $\text{m/z}$ , found: 351.2311  $\text{m/z}$ ; Specific rotation:  $[\alpha]_{\text{D}}^{20}$  -33.1 ( $c$  1.00,  $\text{CHCl}_3$ ) for an enantiomerically enriched sample of >99:1 e.r.

Enantiomeric purity of **3*s*-oxi** was determined by HPLC analysis in comparison with authentic racemic material (97:3 e.r. shown; Chiralcel OZ-H column, 98:2 hexanes/ *i*PrOH, 0.8 mL/min, 254 nm).

&lt;Chromatogram&gt;

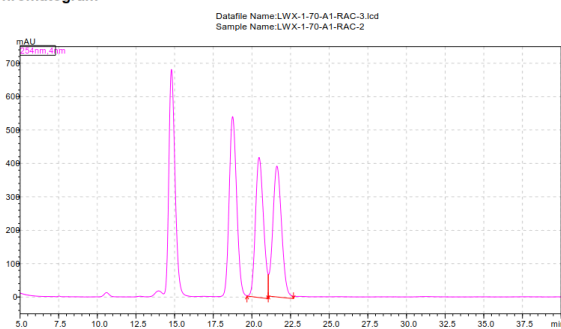

&lt;Peak Table&gt;

| Peak# | Ret. Time | Area     | Height | Area%   | Conc. |
|-------|-----------|----------|--------|---------|-------|
| 1     | 20.466    | 15277981 | 419258 | 49.401  | 0.000 |
| 2     | 21.618    | 15648791 | 391608 | 50.599  | 0.000 |
| Total |           | 30926771 | 810866 | 100.000 |       |

&lt;Chromatogram&gt;

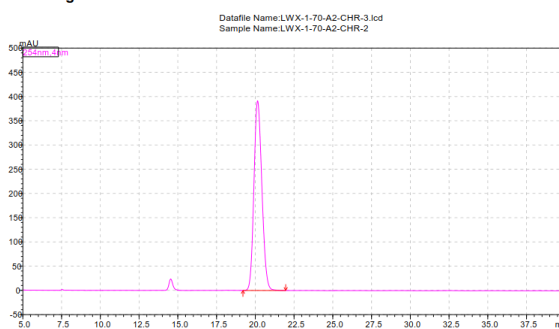

&lt;Peak Table&gt;

| Peak# | Ret. Time | Area     | Height | Area%   | Conc. |
|-------|-----------|----------|--------|---------|-------|
| 1     | 20.147    | 13975250 | 391129 | 100.000 | 0.000 |
| Total |           | 13975250 | 391129 | 100.000 |       |

| Peak # | Time (min) | Area (%) | Peak # | Time (min) | Area (%) |
|--------|------------|----------|--------|------------|----------|
| 1      | 20.466     | 49.401   | 1      | 20.147     | >99.000  |
| 2      | 21.618     | 50.599   | 2      |            | <1.000   |

**(4*S*,5*S*)-4-(Benzofuran-2-yl)-5-(2-bromophenyl)-4,5-dimethyl-1,2-oxaborolan-2-ol (3t).**

**Yield:** (73.7 mg, 96%); **IR (neat):** 3359 (br), 3062 (w), 2973 (m), 2935 (w), 1575 (w), 1452 (m), 1419 (m), 1396 (s), 1304 (m), 1254 (s), 1169 (m), 1053 (m), 1039 (s), 912 (m), 883 (m), 802 (m), 748 (s), 680 (m) cm<sup>-1</sup>; **<sup>1</sup>H NMR (400 MHz, CDCl<sub>3</sub>):** δ 7.37 (d, *J* = 7.6 Hz, 2H), 7.28 (d, *J* = 7.2 Hz, 1H), 7.17 (d, *J* = 7.8 Hz, 1H), 7.11 - 7.01 (m, 2H), 6.83 - 6.71 (m, 2H), 6.19 (s, 1H), 2.05 (s, 3H), 1.85 (s, 3H), 1.69 (d, *J* = 16.6 Hz, 1H), 1.38 (d, *J* = 16.6 Hz, 1H); **<sup>13</sup>C NMR (100 MHz, CDCl<sub>3</sub>):** δ 162.2, 154.1, 142.3, 134.9, 128.8, 128.1, 128.0, 126.2, 123.2, 122.1, 120.2, 119.3, 110.5, 102.4, 91.0, 51.7, 25.0, 24.1; **HRMS (ESI<sup>+</sup>) [M+H]<sup>+</sup>:** Calcd for: C<sub>19</sub>H<sub>19</sub>BBro<sub>3</sub>: 384.0641 m/z, found: 384.0635 m/z.

**(2*S*,3*S*)-2-(benzofuran-2-yl)-3-(2-bromophenyl)-2-methylbutane-1,3-diol (3t-oxi).**

**Yield:** (68.8 mg, 92%); **IR (neat):** 3317 (br), 3060 (w), 2983 (w), 2930 (w), 1674 (m), 1572 (m), 1452 (s), 1419 (m), 1376 (m), 1254 (s), 1208 (m), 1169 (m), 1109 (m), 1015 (s), 908 (m), 800 (m), 745 (s), 676 (m) cm<sup>-1</sup>; **<sup>1</sup>H NMR (400 MHz, CDCl<sub>3</sub>):** δ 7.45 (t, *J* = 7.0 Hz, 2H), 7.33 (d, *J* = 8.2 Hz, 1H), 7.25 - 7.14 (m, 3H), 7.08 (t, *J* = 7.6 Hz, 1H), 7.01 (t, *J* = 7.6 Hz, 1H), 6.38 (s, 1H), 4.20 (s, 1H), 4.11 (d, *J* = 11.2 Hz, 1H), 4.00 (d, *J* = 11.2 Hz, 1H), 2.80 (s, 1H), 1.91 (s, 3H), 1.49 (s, 3H); **<sup>13</sup>C NMR (100 MHz, CDCl<sub>3</sub>):** δ 159.2, 154.3, 142.1, 135.2, 131.3, 128.5, 128.3, 126.1, 123.8, 122.6, 121.0, 120.6, 111.0, 105.7, 81.5, 67.4, 50.0, 27.2, 18.4; **HRMS (ESI<sup>+</sup>) [M+NH<sub>4</sub>]<sup>+</sup>:** Calcd for C<sub>19</sub>H<sub>23</sub>BrNO<sub>3</sub>: 392.0856 m/z, found: 392.0857 m/z; **Specific rotation:** [α]<sub>D</sub><sup>20</sup> -2.9 (c 1.00, CHCl<sub>3</sub>) for an enantiomerically enriched sample of >99:1 e.r.

Enantiomeric purity of **3t-oxi** was determined by HPLC analysis in comparison with authentic racemic material (95:5 d.r., >99:1 e.r. shown; Chiralcel OZ-H column, 97:3 hexanes/ *i*PrOH, 0.8 mL/min, 254 nm).

&lt;Chromatogram&gt;

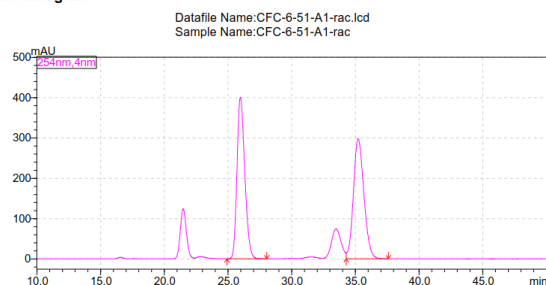

&lt;Peak Table&gt;

| Peak# | Ret. Time | Area     | Height | Area%   |
|-------|-----------|----------|--------|---------|
| 1     | 25.967    | 17007682 | 400446 | 49.943  |
| 2     | 35.217    | 17046460 | 297855 | 50.057  |
| Total |           | 34054142 | 698301 | 100.000 |

&lt;Chromatogram&gt;

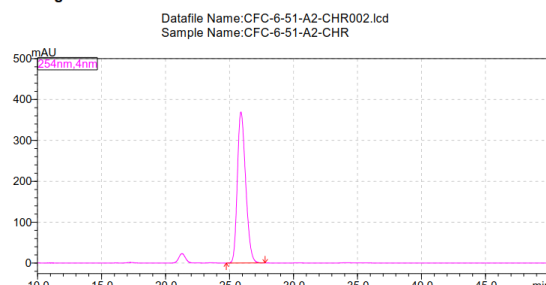

&lt;Peak Table&gt;

| Peak# | Ret. Time | Area     | Height | Area%   |
|-------|-----------|----------|--------|---------|
| 1     | 25.891    | 16702287 | 369510 | 100.000 |
| Total |           | 16702287 | 369510 | 100.000 |

| Peak # | Time (min) | Area (%) | Peak # | Time (min) | Area (%) |
|--------|------------|----------|--------|------------|----------|
| 1      | 25.967     | 49.943   | 1      | 25.891     | >99.000  |
| 2      | 35.217     | 50.057   | 2      |            | <1.000   |

**(4*S*,5*S*)-4-(Benzofuran-2-yl)-4-ethyl-5-methyl-5-phenyl-1,2-oxaborolan-2-ol (7a).** Yield: (61.4 mg, 96%); IR (neat): 3366 (br), 3058 (w), 2963 (m), 1452 (m), 1400 (m), 1376 (m), 1257 (s), 1169 (m), 1094 (m), 1057 (m), 954 (m), 880 (m), 797 (s), 749 (s), 698 (s)  $\text{cm}^{-1}$ ;  $^1\text{H}$  NMR (400 MHz,  $\text{CDCl}_3$ ):  $\delta$  7.33 (d,  $J = 6.4$  Hz, 1H), 7.21 (d,  $J = 8.0$  Hz, 1H), 7.16 - 7.08 (m, 2H), 7.06 - 6.95 (m, 5H), 6.13 (s, 1H), 5.98 (s, 1H), 2.40 (dq,  $J = 14.4, 7.2$  Hz, 1H), 1.85 (s, 3H), 1.81 - 1.77 (m, 1H), 1.53 (d,  $J = 16.5$  Hz, 1H), 1.33 (d,  $J = 16.6$  Hz, 1H), 0.77 (t,  $J = 7.2$  Hz, 3H);  $^{13}\text{C}$  NMR (100 MHz,  $\text{CDCl}_3$ ):  $\delta$  160.3, 154.4, 143.9, 128.1, 127.3, 126.5, 124.5, 123.2, 122.1, 120.2, 110.5, 104.8, 89.8, 55.6, 26.8, 24.5, 9.7; HRMS (ESI<sup>+</sup>) [ $\text{M}+\text{H}$ ]<sup>+</sup>: Calcd for  $\text{C}_{20}\text{H}_{22}\text{BO}_3$ : 320.1693 m/z, found: 320.1694 m/z.

**(2*S*,3*S*)-2-(benzofuran-2-yl)-2-ethyl-3-phenylbutane-1,3-diol (7a-oxi).** Yield: (54.2 mg, 91%); IR (neat): 3298 (br), 2977 (m), 2879 (w), 1491 (s), 1451 (s), 1377 (m), 1255 (m), 1171 (m), 1156 (m), 1073 (m), 1037 (s), 953 (s), 909 (m), 860 (m), 803 (s), 749 (s), 701 (s), 664 (m)  $\text{cm}^{-1}$ ;  $^1\text{H}$  NMR (400 MHz,  $\text{CDCl}_3$ ):  $\delta$  7.33 (d,  $J = 6.6$  Hz, 1H), 7.21 (d,  $J = 8.0$  Hz, 1H), 7.16 - 7.08 (m, 2H), 7.06 - 6.95 (m, 5H), 6.13 (s, 1H), 5.98 (s, 1H), 2.40 (dq,  $J = 14.4, 7.2$  Hz, 1H), 1.85 (s, 3H), 1.81 - 1.77 (m, 1H), 1.53 (d,  $J = 16.6$  Hz, 1H), 1.33 (d,  $J = 16.6$  Hz, 1H), 0.77 (t,  $J = 7.4$  Hz, 3H);  $^{13}\text{C}$  NMR (100 MHz,  $\text{CDCl}_3$ ):  $\delta$  157.7, 153.8, 145.1, 127.8, 127.1, 126.7, 126.1, 123.6, 122.6, 120.6, 110.9, 105.3, 81.5, 62.8, 51.3, 26.3, 21.4, 9.0; HRMS (ESI<sup>+</sup>) [ $\text{M}+\text{NH}_4$ ]<sup>+</sup>: Calcd for:  $\text{C}_{20}\text{H}_{26}\text{NO}_3$ : 328.1907 m/z, found: 328.1909 m/z.

Enantiomeric purity of **7a-oxi** was determined by HPLC analysis in comparison with authentic racemic material (95:5 d.r., >99:1 e.r. shown; Chiralcel OZ-H column, 97:3 hexanes/ *i*PrOH, 0.8 mL/min, 254 nm).



&lt;Chromatogram&gt;

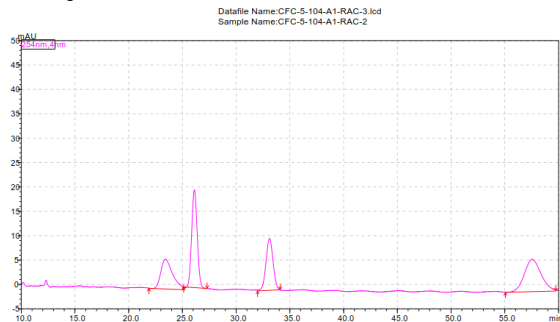

&lt;Peak Table&gt;

| Peak# | Ret. Time | Area    | Height | Area%   | Conc. |
|-------|-----------|---------|--------|---------|-------|
| 1     | 23.423    | 467217  | 6085   | 19.584  | 0.000 |
| 2     | 26.112    | 717018  | 20046  | 30.054  | 0.000 |
| 3     | 33.103    | 485702  | 10608  | 20.358  | 0.000 |
| 4     | 57.537    | 715819  | 6622   | 30.004  | 0.000 |
| Total |           | 2385755 | 43361  | 100.000 |       |

&lt;Chromatogram&gt;

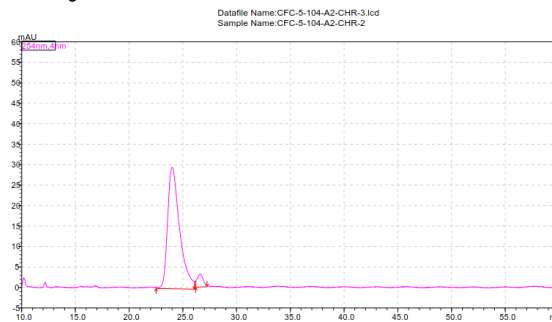

&lt;Peak Table&gt;

| Peak# | Ret. Time | Area    | Height | Area%   | Conc. |
|-------|-----------|---------|--------|---------|-------|
| 1     | 24.001    | 2310230 | 29651  | 95.054  | 0.000 |
| 2     | 26.604    | 120199  | 3112   | 4.946   | 0.000 |
| Total |           | 2430430 | 32763  | 100.000 |       |

| Peak # | Time (min) | Area (%) | Peak # | Time (min) | Area (%) |
|--------|------------|----------|--------|------------|----------|
| 1      | 23.423     | 19.584   | 1      | 24.001     | 95.054   |
| 2      | 26.112     | 30.054   | 2      | 26.604     | 4.946    |
| 3      | 33.103     | 20.358   | 3      |            |          |
| 4      | 57.537     | 30.004   | 4      |            |          |

**(4*S*,5*S*)-4-(Benzo[*b*]thiophen-2-yl)-4,5-dimethyl-5-phenyl-1,2-oxaborolan-2-ol (7b).** Yield: (58.0 mg, 90%); IR (neat): 3338 (br), 2973 (w), 2932 (m), 1427 (m), 1396 (m), 1271 (s), 1189 (m), 1097 (m), 1061 (s), 901 (m), 854 (m), 823 (s), 743 (s), 724 (s), 696 (m) cm<sup>-1</sup>; <sup>1</sup>H NMR (400 MHz, CDCl<sub>3</sub>): δ 7.64 (d, *J* = 7.6 Hz, 1H), 7.52 (d, *J* = 7.6 Hz, 1H), 7.29 - 7.15 (m, 2H), 7.08 - 6.98 (m, 5H), 6.70 (s, 1H), 6.07 (s, 1H), 1.85 (s, 3H), 1.79 - 1.69 (m, 4H), 1.37 (d, *J* = 16.4 Hz, 1H); <sup>13</sup>C NMR (100 MHz, CDCl<sub>3</sub>): δ 151.3, 143.3, 139.4, 139.0, 127.3, 126.6, 124.9, 123.8, 123.5, 122.9, 121.7, 121.0, 89.8, 51.8, 26.4, 24.6; HRMS (ESI<sup>+</sup>) [M+H]<sup>+</sup>: Calcd for: C<sub>19</sub>H<sub>20</sub>BO<sub>2</sub>S: 322.1308 m/z, found: 322.1311 m/z; Specific rotation: [α]<sub>D</sub><sup>20</sup> 32.0 (*c* 1.00, CHCl<sub>3</sub>) for an enantiomerically enriched sample of >99:1 e.r.

**(2*S*,3*S*)-2-(Benzo[*b*]thiophen-2-yl)-2-methyl-3-phenylbutane-1,3-diol (7b-oxi).** Yield: (52.8 mg, 94%); IR (neat): 3171 (br), 2974 (m), 2849(w), 1476 (s), 1430 (s), 1375 (m), 1270 (m), 1154 (m), 1089 (m), 1031 (s), 945 (s), 907 (m), 858 (m), 824 (s), 758 (m), 741 (s), 697 (s), 661 (m) cm<sup>-1</sup>; <sup>1</sup>H NMR (400 MHz, CDCl<sub>3</sub>): δ 7.77 (d, *J* = 7.6 Hz, 1H), 7.61 (d, *J* = 6.8 Hz, 1H), 7.35 - 7.25 (m, 2H), 7.23 - 7.10 (m, 5H), 6.72 (s, 1H), 4.02 - 3.90 (m, 2H), 3.36 (s, 1H), 2.98 (s, 1H), 1.76 (s, 3H), 1.57 (s, 3H); <sup>13</sup>C NMR (100 MHz, CDCl<sub>3</sub>): δ 147.1, 144.2, 139.1, 139.0, 127.1, 124.0, 123.9, 123.1, 123.0, 121.7, 79.6, 69.4, 49.8, 25.9, 20.8; HRMS (ESI<sup>+</sup>) [M+NH<sub>4</sub>]<sup>+</sup>: Calcd for: C<sub>19</sub>H<sub>24</sub>NO<sub>2</sub>S: 330.1522 m/z, found: 330.1518 m/z; Specific rotation: [α]<sub>D</sub><sup>20</sup> 11.0 (*c* 1.00, CHCl<sub>3</sub>) for an enantiomerically enriched sample of >99:1 e.r.

Enantiomeric purity of **7b-oxi** was determined by HPLC analysis in comparison with authentic racemic material (>99:1 e.r. shown; Chiralcel OZ-H column, 97:3 hexanes/ *i*PrOH, 0.8 mL/min, 254 nm).

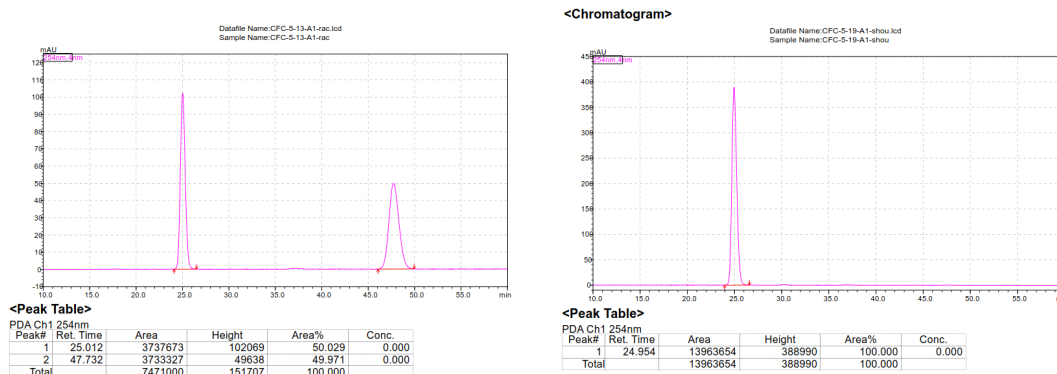

| Peak # | Time (min) | Area (%) | Peak # | Time (min) | Area (%) |
|--------|------------|----------|--------|------------|----------|
| 1      | 25.012     | 50.029   | 1      | 24.954     | >99.000  |
| 2      | 47.732     | 49.971   | 2      |            | <1.000   |

**(4*S*,5*S*)-4-(Benzofuran-3-yl)-4,5-dimethyl-5-phenyl-1,2-oxaborolan-2-ol (7c).** Yield: (48.3 mg, 79%); **IR (neat):** 3342 (br), 2975 (m), 1467 (m), 1412 (m), 1396 (s), 1296 (s), 1246 (m), 1169 (m), 1111 (m), 1054 (m), 1057 (m), 904 (m), 855 (m), 742 (s), 698 (s)  $\text{cm}^{-1}$ ;  **$^1\text{H}$  NMR (400 MHz,  $\text{CDCl}_3$ ):**  $\delta$  7.39 - 7.27 (m, 2H), 7.16 (t,  $J = 7.6$  Hz, 1H), 7.09 (s, 1H), 7.06 - 6.91 (m, 6H), 6.10 (s, 1H), 1.87 (s, 3H), 1.74 - 1.66 (m, 4H), 1.23 (d,  $J = 16.4$  Hz, 1H);  **$^{13}\text{C}$  NMR (100 MHz,  $\text{CDCl}_3$ ):**  $\delta$  155.4, 143.7, 142.3, 127.2, 127.1, 126.7, 125.6, 125.3, 123.4, 121.9, 121.6, 111.4, 89.6, 48.8, 25.1, 24.7; **HRMS (ESI $^+$ ) [M+H] $^+$ :** Calcd for  $\text{C}_{19}\text{H}_{20}\text{O}_3\text{B}$ : 306.1536 m/z, found: 306.1533 m/z.

**(2*S*,3*S*)-2-(Benzofuran-3-yl)-2-methyl-3-phenylbutane-1,3-diol (7c-oxi).** Yield: (43.0 mg, 92%); **IR (neat):** 3234 (br), 3003 (m), 2949(w), 1492 (m), 1448 (s), 1338 (m), 1286 (m), 1231 (m), 1171 (m), 1079 (m), 1022 (s), 1013 (s), 913 (s), 856 (m), 804 (m), 765 (m), 739 (s), 702 (s), 638 (m)  $\text{cm}^{-1}$ ;  **$^1\text{H}$  NMR (400 MHz,  $\text{CDCl}_3$ ):**  $\delta$  7.43 (d,  $J = 8.4$  Hz, 1H), 7.29 - 7.08 (m, 8H), 7.02 (t,  $J = 7.6$  Hz, 1H), 4.11 - 3.91 (m, 2H), 3.15 (s, 1H), 2.83 (s, 1H), 1.72 (s, 3H), 1.62 (s, 3H);  **$^{13}\text{C}$  NMR (100 MHz,  $\text{CDCl}_3$ ):**  $\delta$  155.0, 144.8, 143.9, 127.4, 127.2, 126.9, 123.7, 122.7, 122.2, 122.0, 111.4, 79.9, 68.5, 47.5, 26.1, 19.2; **HRMS (ESI $^+$ ) [M+NH $_4$ ] $^+$ :** Calcd for :  $\text{C}_{19}\text{H}_{24}\text{NO}_3$ : 314.1751 m/z, found: 314.1749 m/z;

Enantiomeric purity of **7c-oxi** was determined by HPLC analysis in comparison with authentic racemic material (92:8 d.r., >99:1 e.r. shown; Chiralcel OZ-H column, 97:3 hexanes/ *i*PrOH, 0.8 mL/min, 220 nm).

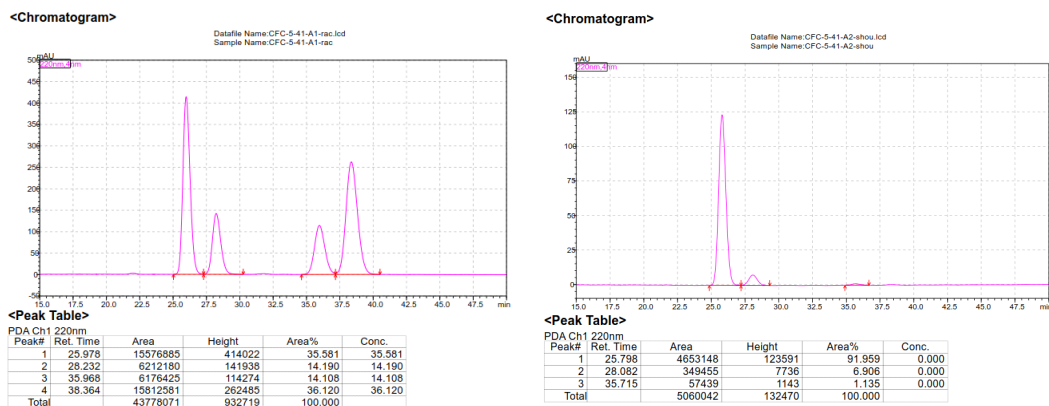

| Peak # | Time (min) | Area (%) | Peak # | Time (min) | Area (%) |
|--------|------------|----------|--------|------------|----------|
| 1      | 25.978     | 35.581   | 1      | 25.798     | 91.959   |
| 2      | 28.232     | 14.190   | 2      | 28.082     | 6.906    |
| 3      | 35.968     | 14.108   | 3      | 35.715     | 1.135    |
| 4      | 38.364     | 36.120   | 4      |            |          |

**(4*S*,5*S*)-4,5-Dimethyl-5-phenyl-4-(5-phenylfuran-2-yl)-1,2-oxaborolan-2-ol (7d).** Yield: (65.1 mg, 98%); IR (neat): 3363 (br), 2962 (m), 2926 (m), 1539 (w), 1445 (m), 1425 (m), 1399 (s), 1260 (s), 1209 (m), 1088 (m), 1067 (m), 1022 (s), 958 (m), 904 (m), 855 (m), 797 (s), 757 (s), 693 (s)  $\text{cm}^{-1}$ ;  $^1\text{H NMR}$  (400 MHz,  $\text{CDCl}_3$ ):  $\delta$  7.49 - 7.45 (m, 2H), 7.36 - 7.27 (m, 3H), 7.24 - 7.18 (m, 1H), 7.15 - 7.09 (m, 4H), 6.31 (d,  $J = 3.4$  Hz, 1H), 5.76 (d,  $J = 3.4$  Hz, 1H), 1.83 (s, 3H), 1.61 (s, 3H), 1.61 (d,  $J = 16.4$  Hz, 1H), 1.28 (d,  $J = 16.4$  Hz, 1H);  $^{13}\text{C NMR}$  (100 MHz,  $\text{CDCl}_3$ ):  $\delta$  158.6, 151.9, 144.0, 130.9, 128.4, 127.4, 126.8, 126.5, 124.4, 123.3, 107.5, 105.1, 89.6, 50.2, 24.7, 22.7; HRMS ( $\text{ESI}^+$ )  $[\text{M}+\text{H}]^+$ : Calcd for:  $\text{C}_{21}\text{H}_{22}\text{BO}_3$ : 332.1693 m/z, found: 332.1698 m/z.

**(2*S*,3*S*)-2-Methyl-3-phenyl-2-(5-phenylfuran-2-yl)butane-1,3-diol (7d-oxi).** Yield: (49.2 mg, 78%); IR (neat): 3246(br), 2983 (w), 2935 (w), 1587 (w), 1478 (m), 1441 (s), 1374 (m), 1277 (m), 1244 (m), 1143 (m), 1059 (m), 1022 (s), 962 (s), 914 (m), 790 (m), 757 (s), 691 (s), 655 (m)  $\text{cm}^{-1}$ ;  $^1\text{H NMR}$  (400 MHz,  $\text{CDCl}_3$ ):  $\delta$  7.48 (d,  $J = 7.6$  Hz, 2H), 7.35 (t,  $J = 7.6$  Hz, 2H), 7.26 - 7.17 (m, 4H), 7.15 - 7.09 (m, 2H), 6.55 (d,  $J = 3.4$  Hz, 1H), 6.00 (d,  $J = 3.4$  Hz, 1H), 3.94 (d,  $J = 11.0$  Hz, 1H), 3.81 (d,  $J = 11.0$  Hz, 1H), 3.49 (s, 1H), 2.85 (s, 1H), 1.72 (s, 3H), 1.53 (s, 3H);  $^{13}\text{C NMR}$  (100 MHz,  $\text{CDCl}_3$ ):  $\delta$  156.1, 152.4, 144.9, 130.7, 128.6, 127.1, 127.0, 126.8, 126.4, 123.5, 109.8, 105.4, 79.8, 67.7, 48.4, 26.0, 17.7; HRMS ( $\text{ESI}^+$ )  $[\text{M}+\text{NH}_4]^+$ : Calcd for:  $\text{C}_{21}\text{H}_{26}\text{NO}_3$ : 340.1907 m/z, found: 340.1901 m/z; Specific rotation:  $[\alpha]_{\text{D}}^{20}$  -46.3 ( $c$  1.00,  $\text{CHCl}_3$ ) for an enantiomerically enriched sample of >99:1 e.r.

Enantiomeric purity of **7d-oxi** was determined by HPLC analysis in comparison with authentic racemic material (99:1 e.r. shown; Chiralcel OZ-H column, 97:3 hexanes/ *i*PrOH, 0.8 mL/min, 254 nm).

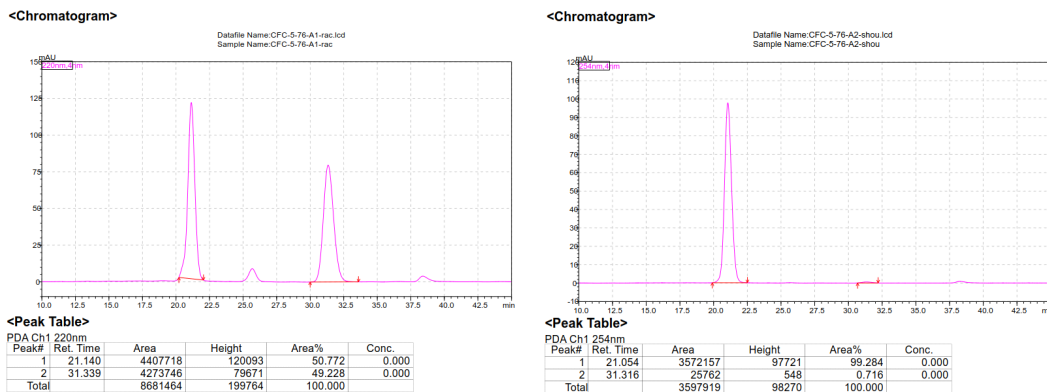

| Peak # | Time (min) | Area (%) | Peak # | Time (min) | Area (%) |
|--------|------------|----------|--------|------------|----------|
| 1      | 21.140     | 50.772   | 1      | 21.054     | 99.284   |
| 2      | 31.339     | 49.228   | 2      | 31.316     | 0.716    |

**(4*S*,5*S*)-4-(5-(3,4-Dimethoxyphenyl)furan-2-yl)-4,5-dimethyl-5-phenyl-1,2-oxaborolan-2-ol (7e).** Yield: (56.4 mg, 72%); IR (neat): 3343 (br), 2963 (w), 2922 (w), 1578 (w), 1432 (m), 1402 (m), 1376 (s), 1243 (s), 1201 (m), 1088 (m), 1034 (m), 1004 (m), 934 (m), 904 (s), 846 (m), 803 (m), 750 (s), 696 (s)  $\text{cm}^{-1}$ ;  $^1\text{H NMR}$  (400 MHz,  $\text{CDCl}_3$ ):  $\delta$  7.13 - 6.97 (m, 6H), 6.90 (d,  $J = 1.6$  Hz, 1H), 6.80 (d,  $J = 8.4$  Hz, 1H), 6.17 (d,  $J = 3.2$  Hz, 1H), 5.88 (s, 1H), 5.74 (d,  $J = 3.2$  Hz, 1H), 3.89 (s, 3H), 3.87 (s, 3H), 1.76 (s, 3H), 1.63 - 1.53 (m, 4H), 1.26 (d,  $J = 16.4$  Hz, 1H);  $^{13}\text{C NMR}$  (100 MHz,  $\text{CDCl}_3$ ):  $\delta$  158.0, 151.8, 148.9, 148.1, 144.2, 127.3, 126.4, 124.4, 124.3, 116.0, 111.2, 107.3, 106.8, 103.7, 89.4, 55.9, 55.8, 50.3, 24.6, 22.5; HRMS ( $\text{ESI}^+$ )  $[\text{M}+\text{NH}_4]^+$ : Calcd for:  $\text{C}_{23}\text{H}_{29}\text{BNO}_2$ : 409.2170 m/z, found: 409.2164 m/z. Specific rotation:  $[\alpha]_{\text{D}}^{20}$  32.7 ( $c$  1.00,  $\text{CHCl}_3$ ) for an enantiomerically enriched sample of >99:1 e.r.

**(2*S*,3*S*)-2-(5-(3,4-Dimethoxyphenyl)furan-2-yl)-2-methyl-3-phenylbutane-1,3-diol (7e-oxi).** Yield: (48.4 mg, 88%); IR (neat): 3334 (br), 2934 (w), 2835 (w), 1596 (w), 1539 (m), 1501 (s), 1442 (m), 1379 (m), 1270 (m), 1247 (s), 1217 (s), 1172 (m), 1138 (s), 1069 (m), 1021 (s), 955 (m), 908 (m), 847 (m), 783 (m), 701 (m), 664 (m)  $\text{cm}^{-1}$ ;  $^1\text{H NMR}$  (400 MHz,  $\text{CDCl}_3$ ):  $\delta$  7.22 - 7.14 (m, 3H), 7.12 - 7.06 (m, 2H), 7.02 (d,  $J = 8.4$  Hz, 1H), 6.87 - 6.78 (m, 2H), 6.40 (d,  $J = 3.2$  Hz, 1H), 6.02 (d,  $J = 3.2$  Hz, 1H), 3.95 (d,  $J = 10.8$  Hz, 1H), 3.86 (s, 4H), 3.84 (s, 3H), 3.75 (d,  $J = 10.8$  Hz, 1H), 3.65 (s, 1H), 3.03 (s, 1H), 1.67 (s, 3H), 1.51 (s, 3H);  $^{13}\text{C NMR}$  (100 MHz,  $\text{CDCl}_3$ ):  $\delta$  155.4, 152.2, 148.9, 148.4, 145.1, 127.1, 126.6, 126.4, 124.0, 116.2, 111.2, 109.7, 106.9, 104.0, 79.8, 67.6, 55.9, 48.2, 25.8, 17.7; HRMS ( $\text{ESI}^+$ )  $[\text{M}+\text{NH}_4]^+$ : Calcd for:  $\text{C}_{23}\text{H}_{30}\text{NO}_5$ : 400.2118 m/z, found: 400.2112 m/z; Specific rotation:  $[\alpha]_{\text{D}}^{20}$  -10.6 ( $c$  1.00,  $\text{CHCl}_3$ ) for an enantiomerically enriched sample of >99:1 e.r.

Enantiomeric purity of **7e-oxi** was determined by HPLC analysis in comparison with authentic racemic material (>99:1 e.r. shown; Chiralcel IC column, 90:10 hexanes/ *i*PrOH, 0.8 mL/min, 254 nm).

&lt;Chromatogram&gt;

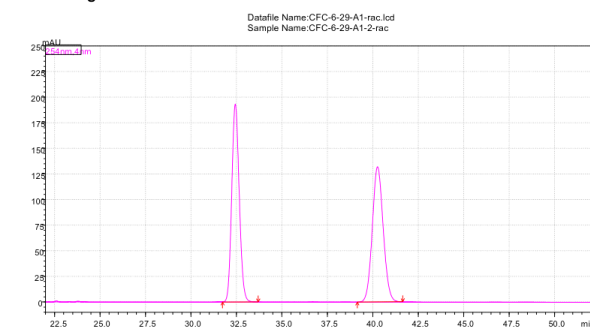

&lt;Peak Table&gt;

| Peak# | Ret. Time | Area     | Height | Area%   | Conc. |
|-------|-----------|----------|--------|---------|-------|
| 1     | 32.436    | 5546061  | 193159 | 50.123  | 0.000 |
| 2     | 40.258    | 5518658  | 131919 | 49.874  | 0.000 |
| Total |           | 11064718 | 325078 | 100.000 |       |

&lt;Chromatogram&gt;

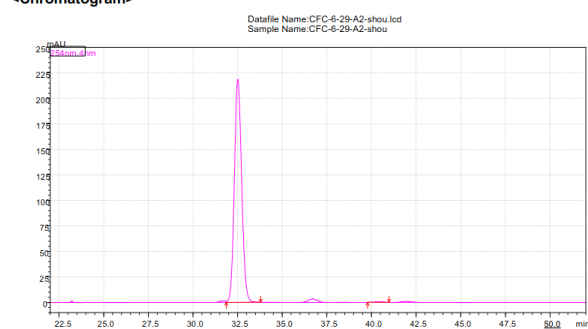

&lt;Peak Table&gt;

| Peak# | Ret. Time | Area    | Height | Area%   | Conc. |
|-------|-----------|---------|--------|---------|-------|
| 1     | 32.509    | 6212210 | 218464 | 99.600  | 0.000 |
| 2     | 40.432    | 21773   | 570    | 0.400   | 0.000 |
| Total |           | 6233983 | 219034 | 100.000 |       |

| Peak # | Time (min) | Area (%) | Peak # | Time (min) | Area (%) |
|--------|------------|----------|--------|------------|----------|
| 1      | 32.436     | 50.123   | 1      | 32.509     | 99.600   |
| 2      | 40.258     | 49.874   | 2      | 40.432     | 0.400    |

**(4*S*,5*S*)-4,5-Dimethyl-5-phenyl-4-(5-(4-(trifluoromethyl)phenyl)furan-2-yl)-1,2-oxaborolan-2-ol (7f).** Yield: (63.2 mg, 79%); IR (neat): 3347 (br), 2979 (w), 2922 (w), 1617 (m), 1544 (w), 1424 (m), 1399 (m), 1320 (s), 1276 (s), 1163 (m), 1107 (s), 1070 (s), 1025 (m), 1014 (m), 955 (m), 903 (m), 880 (m), 839 (m), 757 (s), 697 (s)  $\text{cm}^{-1}$ ;  $^1\text{H NMR}$  (400 MHz,  $\text{CDCl}_3$ ):  $\delta$  7.49 (q,  $J = 8.6$  Hz, 4H), 7.40 - 7.34 (m, 1H), 7.16 - 7.07 (m, 4H), 6.39 (d,  $J = 3.4$  Hz, 1H), 6.14 (s, 1H), 5.80 (d,  $J = 3.4$  Hz, 1H), 1.79 (s, 3H), 1.60 (d,  $J = 16.4$  Hz, 4H), 1.60 (s, 3H), 1.31 (d,  $J = 16.4$  Hz, 1H);  $^{13}\text{C NMR}$  (100 MHz,  $\text{CDCl}_3$ ):  $\delta$  159.9, 150.5, 143.9, 133.9, 132.8 (q,  $J = 32.0$  Hz), 127.5, 126.7, 125.5 (q,  $J = 3.8$  Hz), 124.3, 123.5 (q,  $J = 271.6$  Hz), 123.2, 107.9, 107.2, 89.7, 50.4, 24.7, 22.5;  $^{19}\text{F NMR}$  (376 MHz,  $\text{CDCl}_3$ ):  $\delta$  -62.4; HRMS (ESI $^+$ )  $[\text{M}+\text{H}]^+$ : Calcd for:  $\text{C}_{22}\text{H}_{21}\text{BF}_3\text{O}_3$ : 400.1567 m/z, found: 400.1560 m/z.

**(2*S*,3*S*)-2-Methyl-3-phenyl-2-(5-(4-(trifluoromethyl)phenyl)furan-2-yl)butane-1,3-diol (7f-oxi).** Yield: (34.5 mg, 56%); IR (neat): 3342 (br), 2982 (w), 2943 (w), 1617 (m), 1539 (m), 1495 (s), 1447 (m), 1377 (m), 1321 (s), 1211 (m), 1163 (s), 1108 (s), 1071 (m), 1024 (m), 947 (m), 908 (m), 839 (m), 788 (m), 701 (m), 652 (m)  $\text{cm}^{-1}$ ;  $^1\text{H NMR}$  (400 MHz,  $\text{CDCl}_3$ ):  $\delta$  7.57 (d,  $J = 8.2$  Hz, 2H), 7.50 (d,  $J = 8.2$  Hz, 2H), 7.24 - 7.16 (m, 3H), 7.15 - 7.06 (m, 2H), 6.66 (d,  $J = 3.2$  Hz, 1H), 6.09 (d,  $J = 3.2$  Hz, 1H), 3.99 (d,  $J = 10.8$  Hz, 1H), 3.79 (d,  $J = 11.0$  Hz, 1H), 3.58 (s, 1H), 3.06 (s, 1H), 1.71 (s, 3H), 1.54 (s, 3H);  $^{13}\text{C NMR}$  (100 MHz,  $\text{CDCl}_3$ ):  $\delta$  147.4, 140.8, 134.9, 123.7, 118.7 (q,  $J = 32.2$  Hz), 117.2, 116.9, 116.3, 115.6 (q,  $J = 3.8$  Hz), 115.5, 114.4 (q,  $J = 272.0$  Hz), 113.4, 100.1, 97.4, 69.8, 57.7, 38.3, 15.9, 7.7;  $^{19}\text{F NMR}$  (376 MHz,  $\text{CDCl}_3$ ):  $\delta$  -62.5; HRMS (ESI $^+$ )  $[\text{M}+\text{NH}_4]^+$ : Calcd for:  $\text{C}_{22}\text{H}_{25}\text{F}_3\text{NO}_3$ : 408.1781 m/z, found: 408.1781 m/z; Specific rotation:  $[\alpha]_{\text{D}}^{20}$  -33.5 ( $c$  1.00,  $\text{CHCl}_3$ ) for an enantiomerically enriched sample of >99:1 e.r.

Enantiomeric purity of **7f-oxi** was determined by HPLC analysis in comparison with authentic racemic material (>99:1 e.r. shown; Chiralcel OZ-H column, 97:3 hexanes/ *i*PrOH, 0.8 mL/min, 254 nm).

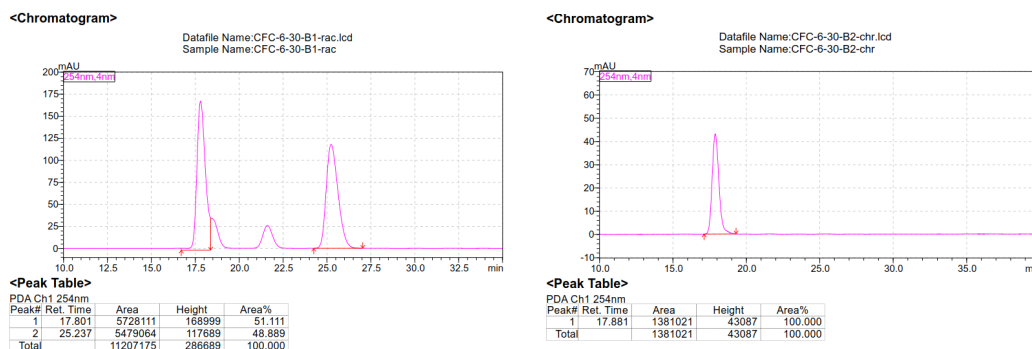

| Peak # | Time (min) | Area (%) | Peak # | Time (min) | Area (%) |
|--------|------------|----------|--------|------------|----------|
| 1      | 17.801     | 51.111   | 1      | 17.881     | >99.000  |
| 2      | 25.237     | 48.889   | 2      |            | <1.000   |

**(4*S*,5*S*)-4,5-Dimethyl-5-phenyl-4-(5-phenylthiophen-2-yl)-1,2-oxaborolan-2-ol (7g).** Yield: (68.2 mg, 98%); IR (neat): 3339 (br), 2972 (w), 2930 (w), 1598 (w), 1444 (m), 1421 (m), 1396 (s), 1265 (s), 1211 (m), 1096 (m), 1056 (m), 1027 (m), 952 (m), 904 (s), 848 (m), 803 (m), 752 (s), 694 (s)  $\text{cm}^{-1}$ ;  $^1\text{H NMR}$  (400 MHz,  $\text{CDCl}_3$ ):  $\delta$  7.47 (d,  $J = 7.6$  Hz, 2H), 7.33 (t,  $J = 7.6$  Hz, 2H), 7.25 (d,  $J = 7.0$  Hz, 1H), 7.16 - 7.09 (m, 3H), 7.08 - 7.01 (m, 2H), 6.94 (d,  $J = 3.6$  Hz, 1H), 6.42 (d,  $J = 3.6$  Hz, 1H), 1.82 (s, 3H), 1.74 - 1.66 (m, 4H), 1.34 (d,  $J = 16.6$  Hz, 1H);  $^{13}\text{C NMR}$  (100 MHz,  $\text{CDCl}_3$ ):  $\delta$  150.2, 143.6, 142.2, 134.4, 128.7, 127.3, 127.0, 126.6, 125.4, 125.2, 124.9, 122.1, 89.9, 51.5, 26.2, 24.3; HRMS (ESI<sup>+</sup>)  $[\text{M}+\text{H}]^+$ : Calcd for:  $\text{C}_{21}\text{H}_{22}\text{BO}_2\text{S}$ : 348.1464 m/z, found: 348.1467 m/z.

**(2*S*,3*S*)-2-Methyl-3-phenyl-2-(5-phenylthiophen-2-yl)butane-1,3-diol (7g-oxi).** Yield: (55.6 mg, 84%); IR (neat): 3175 (br), 2942 (w), 2881 (w), 1595 (w), 1491 (m), 1460 (s), 1376 (m), 1272 (m), 1236 (m), 1161 (m), 1092 (m), 1059 (m), 1032 (s), 954 (m), 910 (m), 820 (m), 753 (s), 700 (s), 687 (m)  $\text{cm}^{-1}$ ;  $^1\text{H NMR}$  (400 MHz,  $\text{CDCl}_3$ ):  $\delta$  7.58 (d,  $J = 7.6$  Hz, 2H), 7.37 (t,  $J = 7.6$  Hz, 2H), 7.29 - 7.20 (m, 4H), 7.19 - 7.13 (m, 2H), 7.08 (d,  $J = 3.8$  Hz, 1H), 6.41 (d,  $J = 3.8$  Hz, 1H), 3.93 (d,  $J = 10.8$  Hz, 1H), 3.87 (d,  $J = 10.8$  Hz, 1H), 3.66 (s, 1H), 3.34 (s, 1H), 1.73 (s, 3H), 1.54 (s, 3H);  $^{13}\text{C NMR}$  (100 MHz,  $\text{CDCl}_3$ ):  $\delta$  145.6, 144.4, 142.7, 134.3, 128.8, 127.3, 127.1, 127.1, 127.0, 127.0, 125.5, 121.8, 79.9, 69.5, 49.3, 25.7, 20.8; HRMS (ESI<sup>+</sup>)  $[\text{M}+\text{NH}_4]^+$ : Calcd for :  $\text{C}_{21}\text{H}_{26}\text{NO}_2\text{S}$ : 356.1679 m/z, found: 356.1676 m/z; Specific rotation:  $[\alpha]_{\text{D}}^{20}$  6.27 ( $c$  1.00,  $\text{CHCl}_3$ ) for an enantiomerically enriched sample of >99:1 e.r.

Enantiomeric purity of **7g-oxi** was determined by HPLC analysis in comparison with authentic racemic material (>99:1 e.r. shown; Chiralcel OZ-H column, 95:5 hexanes/ *i*PrOH, 0.8 mL/min, 254 nm).

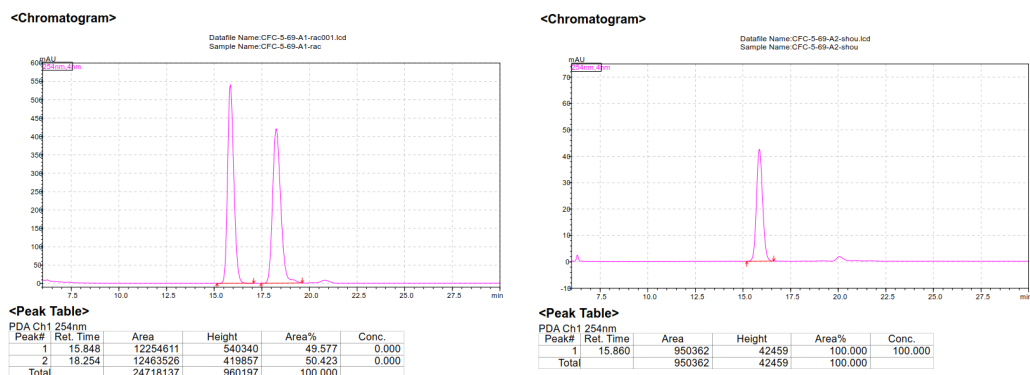

| Peak # | Time (min) | Area (%) | Peak # | Time (min) | Area (%) |
|--------|------------|----------|--------|------------|----------|
| 1      | 15.848     | 49.577   | 1      | 15.860     | >99.000  |
| 2      | 18.254     | 50.423   | 2      |            | <1.000   |

***tert*-Butyl 3-((4*R*,5*S*)-2-hydroxy-4,5-dimethyl-5-phenyl-1,2-oxaborolan-4-yl)-1*H*-indole-1-carboxylate (7h).** Yield: (66.4 mg, 82%); IR (neat): 3343 (br), 2966 (w), 2910 (w), 1723 (s), 1545 (w), 1456 (m), 1434 (m), 1406 (s), 1345 (m), 1301 (s), 1267 (m), 1130 (s), 1102 (m), 1038 (m), 1010 (m), 945 (w), 902 (m), 843 (m), 732 (s), 689 (m)  $\text{cm}^{-1}$ ;  $^1\text{H NMR}$  (400 MHz,  $\text{CDCl}_3$ ):  $\delta$  8.20 (d,  $J = 8.2$  Hz, 1H), 7.49 (s, 1H), 7.38 - 7.28 (m, 6H), 7.13 - 7.05 (m, 1H), 6.99 - 6.91 (m, 1H), 5.89 (s, 1H), 2.26 (d,  $J = 16.4$  Hz, 1H), 1.70 (s, 9H), 1.63 (s, 3H), 1.54 (s, 3H), 1.26 (d,  $J = 16.4$  Hz, 1H);  $^{13}\text{C NMR}$  (100 MHz,  $\text{CDCl}_3$ ):  $\delta$  149.7, 143.4, 129.6, 127.4, 127.0, 126.3, 125.3, 125.0, 124.9, 123.8, 123.2, 121.7, 115.1, 89.5, 83.8, 49.4, 28.2, 27.4, 26.8; HRMS (ESI<sup>+</sup>) [ $\text{M}+\text{NH}_4$ ]<sup>+</sup>: Calcd for:  $\text{C}_{24}\text{H}_{32}\text{BN}_2\text{O}_4$ : 422.2486 m/z, found: 422.2481 m/z.

***tert*-Butyl 3-((2*S*,3*S*)-1,3-dihydroxy-2-methyl-3-phenylbutan-2-yl)-1*H*-indole-1-carboxylate (7h-oxi).** Yield: (38.9 mg, 60%); IR (neat): 3378 (br), 2965 (m), 2913 (m), 1714 (s), 1565 (m), 1433 (m), 1401 (m), 1356 (s), 1326 (s), 1245 (m), 1136 (m), 1102 (s), 1031 (m), 1001 (s), 941 (m), 875 (m), 837 (m), 743 (s), 688 (s)  $\text{cm}^{-1}$ ;  $^1\text{H NMR}$  (400 MHz,  $\text{CDCl}_3$ ):  $\delta$  8.16 (d,  $J = 8.4$  Hz, 1H), 7.58 (d,  $J = 8.0$  Hz, 1H), 7.49 (s, 1H), 7.35 (d,  $J = 6.4$  Hz, 2H), 7.27 - 7.19 (m, 4H), 7.11 (t,  $J = 7.8$  Hz, 1H), 4.27 (d,  $J = 11.0$  Hz, 1H), 3.91 (d,  $J = 11.0$  Hz, 1H), 2.61 (s, 1H), 2.02 (s, 1H), 1.66 (s, 9H), 1.62 (s, 3H), 1.47 (s, 3H);  $^{13}\text{C NMR}$  (100 MHz,  $\text{CDCl}_3$ ):  $\delta$  149.6, 144.6, 135.6, 130.2, 127.3, 126.9, 126.9, 126.1, 123.9, 122.6, 122.4, 121.9, 115.1, 83.9, 79.3, 67.8, 49.1, 28.2, 26.9, 20.2; HRMS (ESI<sup>+</sup>) [ $\text{M}+\text{NH}_4$ ]<sup>+</sup>: Calcd for:  $\text{C}_{24}\text{H}_{33}\text{N}_2\text{O}_4$ : 413.2435 m/z, found: 413.2431 m/z. Specific rotation:  $[\alpha]_{\text{D}}^{20} -3.7$  ( $c$  0.50,  $\text{CHCl}_3$ ) for an enantiomerically enriched sample of 96:4 e.r.

Enantiomeric purity of **7h-oxi** was determined by HPLC analysis in comparison with authentic racemic material (96:4 e.r. shown; Chiralcel OZ-H column, 95:5 hexanes/ *i*PrOH, 0.8 mL/min, 220 nm).

&lt;Chromatogram&gt;

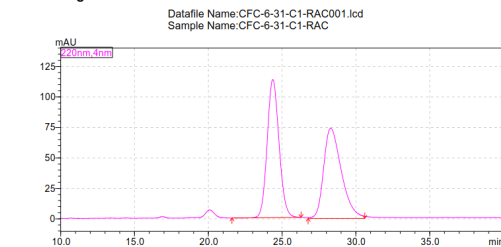

&lt;Peak Table&gt;

| Peak# | Ret. Time | Area     | Height | Conc.   |
|-------|-----------|----------|--------|---------|
| 1     | 24.369    | 6317496  | 113231 | 50.513  |
| 2     | 28.292    | 6189272  | 74035  | 49.487  |
| Total |           | 12506768 | 187266 | 100.000 |

&lt;Chromatogram&gt;

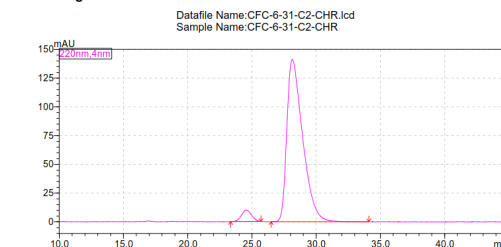

&lt;Peak Table&gt;

| Peak# | Ret. Time | Area     | Height | Conc. | Area%   |
|-------|-----------|----------|--------|-------|---------|
| 1     | 24.570    | 540313   | 9971   | 0.000 | 4.288   |
| 2     | 28.142    | 12061455 | 141386 | 0.000 | 95.712  |
| Total |           | 12601768 | 151357 |       | 100.000 |

| Peak # | Time (min) | Area (%) | Peak # | Time (min) | Area (%) |
|--------|------------|----------|--------|------------|----------|
| 1      | 24.369     | 50.513   | 1      | 24.570     | 4.288    |
| 2      | 28.292     | 49.487   | 2      | 28.142     | 95.712   |

**tert-Butyl 4-((4*R*,5*S*)-2-hydroxy-4,5-dimethyl-5-phenyl-1,2-oxaborolan-4-yl)-1*H*-indole-1-carboxylate (7i).** Yield: (66.5 mg, 82%); IR (neat): 3357 (br), 2977 (w), 2933 (w), 1731 (s), 1542 (w), 1477 (m), 1452 (m), 1412 (s), 1372 (m), 1345 (s), 1283 (m), 1149 (s), 1118 (m), 1048 (m), 1030 (m), 945 (w), 900 (m), 850 (m), 755 (s), 699 (m)  $\text{cm}^{-1}$ ;  $^1\text{H NMR}$  (400 MHz,  $\text{CDCl}_3$ ):  $\delta$  8.07 (d,  $J = 8.0$  Hz, 1H), 7.56 - 7.47 (m, 1H), 7.30 (s, 1H), 7.05 - 6.95 (m, 2H), 6.95 - 6.81 (m, 3H), 6.74 - 6.66 (m, 2H), 6.13 (s, 1H), 1.97 (d,  $J = 16.0$  Hz, 1H), 1.91 (s, 3H), 1.83 (s, 3H), 1.68 (s, 9H), 1.13 (d,  $J = 16.0$  Hz, 1H);  $^{13}\text{C NMR}$  (100 MHz,  $\text{CDCl}_3$ ):  $\delta$  149.6, 143.8, 137.4, 129.1, 126.9, 126.2, 125.3, 124.6, 123.5, 122.7, 113.8, 108.6, 90.0, 83.6, 54.4, 28.2, 26.3, 25.7; HRMS (ESI<sup>+</sup>) [M+H]<sup>+</sup>: Calcd for:  $\text{C}_{24}\text{H}_{29}\text{BNO}_4$ : 405.2220 m/z, found: 405.2215 m/z.

**tert-Butyl 4-((2*S*,3*S*)-1,3-dihydroxy-2-methyl-3-phenylbutan-2-yl)-1*H*-indole-1-carboxylate (7i-oxi).** Yield: (53.1 mg, 82%); IR (neat): 3368 (br), 2977 (m), 2929 (m), 1728 (s), 1598 (m), 1477 (m), 1448 (m), 1413 (s), 1344 (s), 1316 (s), 1283 (m), 1154 (m), 1128 (s), 1048 (m), 1026 (s), 921 (m), 886 (m), 851 (m), 755 (s), 701 (s)  $\text{cm}^{-1}$ ;  $^1\text{H NMR}$  (400 MHz,  $\text{CDCl}_3$ ):  $\delta$  8.19 (d,  $J = 8.4$  Hz, 1H), 7.47 (d,  $J = 3.8$  Hz, 1H), 7.20 - 7.09 (m, 4H), 7.01 (d,  $J = 7.0$  Hz, 2H), 6.94 (d,  $J = 7.8$  Hz, 1H), 6.42 (d,  $J = 3.8$  Hz, 1H), 4.30 (d,  $J = 11.0$  Hz, 1H), 4.05 (d,  $J = 8.0$  Hz, 1H), 2.85 (s, 1H), 2.31 (s, 1H), 1.73 (s, 3H), 1.67 (s, 9H), 1.61 (s, 3H);  $^{13}\text{C NMR}$  (100 MHz,  $\text{CDCl}_3$ ):  $\delta$  149.5, 144.8, 136.0, 134.6, 130.4, 127.0, 126.9, 126.7, 125.0, 124.3, 123.5, 114.2, 108.9, 83.6, 79.7, 68.7, 52.6, 28.1, 26.2, 21.2; HRMS (ESI<sup>+</sup>) [M+NH<sub>4</sub>]<sup>+</sup>: Calcd for:  $\text{C}_{24}\text{H}_{33}\text{N}_2\text{O}_4$ : 413.2435 m/z, found: 413.2431 m/z.

Enantiomeric purity of **7i-oxi** was determined by HPLC analysis in comparison with authentic racemic material (84.5:15.5 d.r., 97:3 e.r. shown; Chiralcel IC column, 95:5 hexanes/ *i*PrOH, 0.8 mL/min, 220 nm).



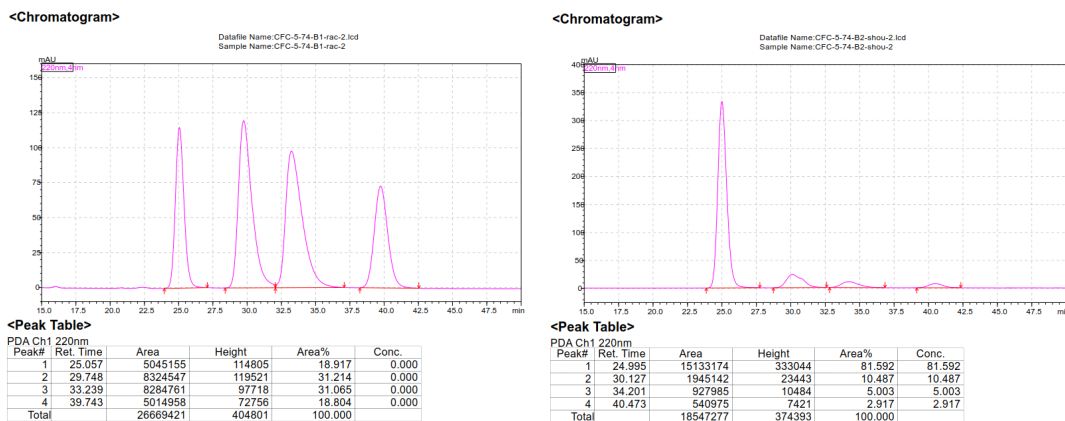

| Peak # | Time (min) | Area (%) | Peak # | Time (min) | Area (%) |
|--------|------------|----------|--------|------------|----------|
| 1      | 25.057     | 18.917   | 1      | 24.995     | 81.592   |
| 2      | 29.748     | 31.214   | 2      | 30.127     | 10.487   |
| 3      | 33.239     | 31.065   | 3      | 34.201     | 5.003    |
| 4      | 39.743     | 18.804   | 4      | 40.473     | 2.917    |

**(4*S*,5*S*)-4-(Dibenzo[*b,d*]furan-3-yl)-4,5-dimethyl-5-phenyl-1,2-oxaborolan-2-ol (7j).** Yield: (49.8 mg, 70%); IR (neat): 3355 (br), 3058 (w), 2975 (w), 1600 (w), 1479 (m), 1448 (m), 1422 (m), 1398 (s), 1378 (m), 1302 (m), 1283 (m), 1199 (s), 1129 (m), 1061 (m), 1022 (m), 903 (m), 842 (m), 748 (s), 699 (m)  $\text{cm}^{-1}$ ;  $^1\text{H NMR}$  (400 MHz,  $\text{CDCl}_3$ ):  $\delta$  7.83 (d,  $J = 7.6$  Hz, 1H), 7.59 (s, 1H), 7.52 - 7.44 (m, 2H), 7.35 - 7.27 (m, 2H), 7.22 (d,  $J = 8.8$  Hz, 1H), 6.99 - 6.91 (m, 3H), 6.85 - 6.77 (m, 2H), 1.85 (d,  $J = 16.4$  Hz, 1H), 1.85 (s, 3H), 1.75 (s, 3H), 1.30 (d,  $J = 16.4$  Hz, 1H);  $^{13}\text{C NMR}$  (100 MHz,  $\text{CDCl}_3$ ):  $\delta$  156.4, 154.5, 143.7, 139.4, 127.1, 126.8, 126.4, 126.3, 125.2, 124.3, 123.2, 122.5, 120.4, 118.8, 111.5, 110.1, 90.1, 52.5, 26.0, 24.7; HRMS (ESI $^+$ )  $[\text{M}+\text{H}]^+$ : Calcd for:  $\text{C}_{23}\text{H}_{22}\text{BO}_3$ : 356.1693 m/z, found: 356.1695 m/z.

**(2*S*,3*S*)-2-(Dibenzo[*b,d*]furan-3-yl)-2-methyl-3-phenylbutane-1,3-diol (7j-oxi).** Yield: (41.4 mg, 83%); IR (neat): 3215 (br), 2978 (w), 2923 (w), 1589 (w), 1475 (m), 1447 (s), 1372 (m), 1313 (m), 1249 (m), 1198 (s), 1128 (m), 1063 (m), 1019 (s), 922 (m), 842 (m), 810 (m), 747 (s), 701 (s)  $\text{cm}^{-1}$ ;  $^1\text{H NMR}$  (400 MHz,  $\text{CDCl}_3$ ):  $\delta$  7.85 - 7.79 (m, 1H), 7.60 - 7.55 (m, 2H), 7.47 - 7.41 (m, 2H), 7.36 - 7.31 (m, 2H), 7.21 - 7.14 (m, 3H), 6.99 (d,  $J = 7.4$  Hz, 2H), 4.21 - 4.16 (m, 1H), 3.94 (d,  $J = 11.0$  Hz, 1H), 3.30 (s, 1H), 3.03 (s, 1H), 1.68 (s, 3H), 1.62 (s, 3H);  $^{13}\text{C NMR}$  (100 MHz,  $\text{CDCl}_3$ ):  $\delta$  156.4, 154.8, 144.7, 136.1, 127.8, 127.2, 127.1, 127.0, 126.9, 124.3, 123.2, 122.6, 120.8, 120.4, 111.6, 110.1, 79.9, 68.9, 49.6, 25.8, 19.6; HRMS (ESI $^+$ )  $[\text{M}+\text{NH}_4]^+$ : Calcd for:  $\text{C}_{23}\text{H}_{26}\text{NO}_3$ : 364.1907 m/z, found: 364.1906 m/z.

Enantiomeric purity of **7j-oxi** was determined by HPLC analysis in comparison with authentic racemic material (69.5:30.5 d.r., 97.5:2.5 e.r. shown; Chiralcel IG column, 96:4 hexanes/ *i*PrOH, 0.8 mL/min, 220 nm).

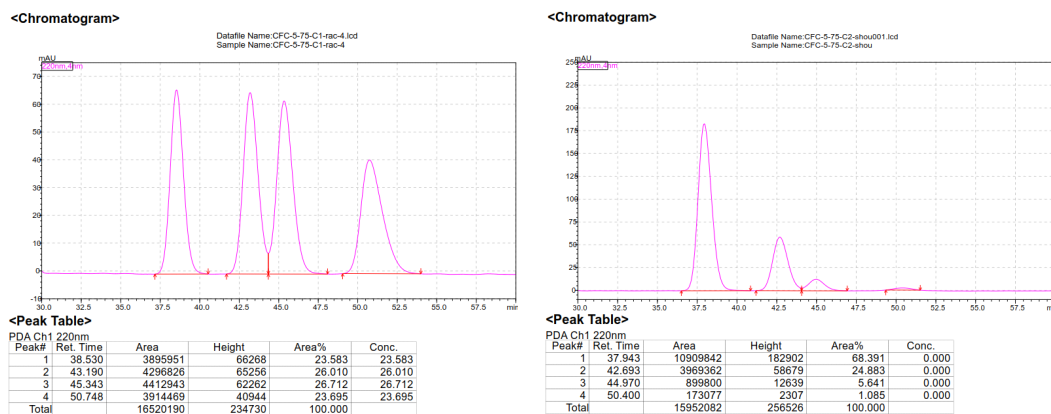

| Peak # | Time (min) | Area (%) | Peak # | Time (min) | Area (%) |
|--------|------------|----------|--------|------------|----------|
| 1      | 38.530     | 23.583   | 1      | 37.943     | 68.391   |
| 2      | 43.190     | 26.010   | 2      | 42.693     | 24.883   |
| 3      | 45.343     | 26.712   | 3      | 44.970     | 5.641    |
| 4      | 50.748     | 23.695   | 4      | 50.400     | 1.085    |

***tert*-Butyl 2-((4*S*,5*S*)-2-hydroxy-4,5-dimethyl-5-phenyl-1,2-oxaborolan-4-yl)-9H-carbazole-9-carboxylate (7k). Yield: (67.3 mg, 74%); IR (neat): 3399 (br), 2974 (w), 2932 (w), 1722 (s), 1622 (w), 1496 (m), 1458 (m), 1422 (m), 1396 (s), 1356 (s), 1334 (s), 1285 (m), 1225 (m), 1142 (s), 1117 (m), 1047 (m), 1006 (m), 903 (m), 840 (m), 758 (s), 747 (s), 699 (s)  $\text{cm}^{-1}$ ;  $^1\text{H}$  NMR (400 MHz,  $\text{CDCl}_3$ ):  $\delta$  8.38 - 8.32 (m, 1H), 8.03 - 7.92 (m, 2H), 7.69 (d,  $J$  = 8.2 Hz, 1H), 7.47 - 7.30 (m, 4H), 7.00 - 6.92 (m, 2H), 6.80 (d,  $J$  = 7.2 Hz, 2H), 6.27 (s, 1H), 1.86 (d,  $J$  = 16.4 Hz, 1H), 1.86 (s, 3H), 1.76 (s, 3H), 1.73 (s, 9H), 1.24 (d,  $J$  = 16.4 Hz, 1H);  $^{13}\text{C}$  NMR (100 MHz,  $\text{CDCl}_3$ ):  $\delta$  151.0, 143.8, 138.9, 138.1, 127.4, 127.0, 126.7, 126.4, 126.2, 125.3, 123.7, 122.8, 122.1, 119.4, 118.2, 116.2, 115.2, 90.0, 83.5, 53.2, 28.3, 25.9, 24.5; HRMS (ESI $^+$ )  $[\text{M}+\text{H}]^+$ : Calcd for:  $\text{C}_{28}\text{H}_{31}\text{BNO}_4$ : 455.2377 m/z, found: 455.2373 m/z.**

***tert*-Butyl 2-((2*S*,3*S*)-1,3-dihydroxy-2-methyl-3-phenylbutan-2-yl)-9H-carbazole-9-carboxylate (7k-oxi). Yield: (52.7 mg, 80%); IR (neat): 3339 (br), 2977 (w), 2930 (w), 1722 (s), 1623 (w), 1496 (m), 1457 (s), 1421 (m), 1355 (s), 1335 (s), 1309 (m), 1255 (m), 1154 (s), 1141 (s), 1118 (m), 1046 (m), 1025 (s), 938 (m), 836 (m), 820 (m), 747 (s), 702 (s)  $\text{cm}^{-1}$ ;  $^1\text{H}$  NMR (400 MHz,  $\text{CDCl}_3$ ):  $\delta$  8.40 (d,  $J$  = 8.4 Hz, 1H), 8.00 - 7.91 (m, 2H), 7.80 (d,  $J$  = 8.2 Hz, 1H), 7.48 (t,  $J$  = 7.8 Hz, 1H), 7.36 (t,  $J$  = 7.4 Hz, 1H), 7.23 - 7.10 (m, 4H), 6.96 (d,  $J$  = 7.4 Hz, 2H), 4.19 (d,  $J$  = 11.0 Hz, 1H), 3.95 (d,  $J$  = 11.0 Hz, 1H), 3.45 (s, 1H), 3.06 (s, 1H), 1.72 (s, 3H), 1.70 (s, 3H), 1.67 (s, 9H);  $^{13}\text{C}$  NMR (100 MHz,  $\text{CDCl}_3$ ):  $\delta$  150.9, 144.7, 140.8, 139.0, 137.7, 127.1, 127.0, 126.9, 126.7, 125.3, 124.2, 123.6, 123.0, 119.4, 118.2, 116.8, 116.3, 83.6, 80.0, 68.6, 50.1, 28.2, 25.9, 19.4; HRMS (ESI $^+$ )  $[\text{M}+\text{NH}_4]^+$ : Calcd for:  $\text{C}_{28}\text{H}_{35}\text{N}_2\text{O}_4$ : 463.2591 m/z, found: 463.2585 m/z.**

Enantiomeric purity of **7k-oxi** was determined by HPLC analysis in comparison with authentic racemic material (71:29 d.r., 96:4 e.r. shown; Chiralcel IC column, 95:5 hexanes/ *i*PrOH, 0.8 mL/min, 220 nm).

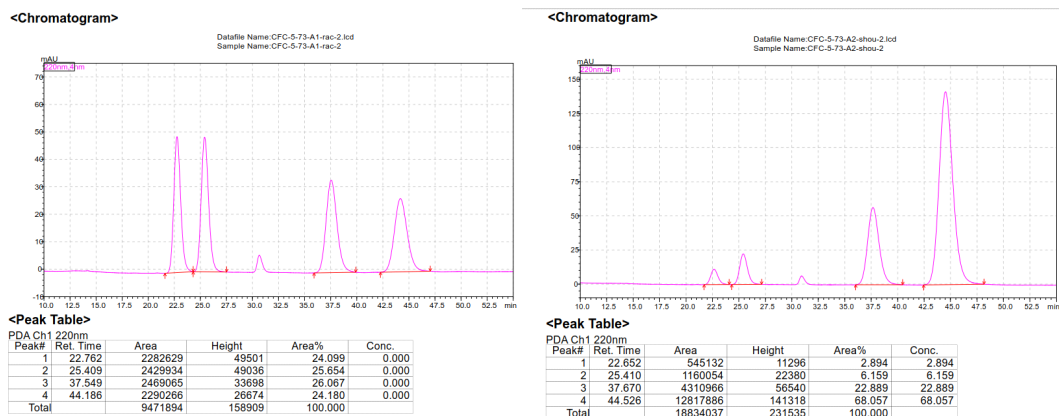

| Peak # | Time (min) | Area (%) | Peak # | Time (min) | Area (%) |
|--------|------------|----------|--------|------------|----------|
| 1      | 22.762     | 24.099   | 1      | 22.652     | 2.894    |
| 2      | 25.409     | 25.654   | 2      | 25.410     | 6.159    |
| 3      | 37.549     | 26.067   | 3      | 37.670     | 22.899   |
| 4      | 44.186     | 24.180   | 4      | 44.526     | 68.057   |

***tert*-Butyl 3-((4*S*,5*S*)-2-hydroxy-4,5-dimethyl-5-phenyl-1,2-oxaborolan-4-yl)-9H-carbazole-9-carboxylate (71).** Yield: (62.8 mg, 69%); IR (neat): 3378 (br), 2954 (w), 2912 (w), 1710 (s), 1598 (m), 1478 (m), 1446 (m), 1421 (m), 1367 (s), 1321 (s), 1267 (m), 1212 (m), 1130 (s), 1110 (m), 1041 (m), 903 (m), 843 (m), 756 (s), 678 (s) cm<sup>-1</sup>; <sup>1</sup>H NMR (400 MHz, CDCl<sub>3</sub>): δ 8.28 (d, *J* = 8.4 Hz, 1H), 8.01 - 7.88 (m, 1H), 7.80 (d, *J* = 7.8 Hz, 1H), 7.55 - 7.40 (m, 1H), 7.40 - 7.25 (m, 3H), 7.14 (d, *J* = 7.4 Hz, 1H), 6.99 - 6.90 (m, 2H), 6.90 - 6.78 (m, 2H), 5.96 (s, 1H), 1.85 (s, 3H), 1.82 - 1.78 (m, 4H), 1.74 (s, 9H), 1.28 (d, *J* = 16.4 Hz, 1H); <sup>13</sup>C NMR (100 MHz, CDCl<sub>3</sub>): δ 151.1, 143.8, 139.7, 138.7, 136.7, 127.1, 126.8, 126.4, 125.3, 122.8, 119.3, 118.0, 116.2, 114.9, 90.1, 83.8, 52.5, 28.4, 26.0, 24.8; HRMS (ESI<sup>+</sup>) [M+H]<sup>+</sup>: Calcd for: C<sub>28</sub>H<sub>31</sub>BNO<sub>4</sub>: 455.2377 m/z, found: 455.2373 m/z.

***tert*-Butyl 3-((2*S*,3*S*)-1,3-dihydroxy-2-methyl-3-phenylbutan-2-yl)-9H-carbazole-9-carboxylate (71-oxi).** Yield: (52.2 mg, 85%); IR (neat): 3324 (br), 3013 (w), 2956 (w), 1734 (s), 1587 (w), 1478 (m), 1445 (s), 1412 (m), 1336 (s), 1306 (m), 1251 (m), 1154 (s), 1124 (m), 1078 (m), 1025 (s), 910 (m), 824 (m), 756 (s), 698 (s) cm<sup>-1</sup>; <sup>1</sup>H NMR (400 MHz, CDCl<sub>3</sub>): δ 8.30 (d, *J* = 8.0 Hz, 1H), 8.11 (d, *J* = 8.8 Hz, 1H), 7.78 (d, *J* = 7.6 Hz, 1H), 7.51 - 7.44 (m, 2H), 7.40 - 7.29 (m, 2H), 7.20 - 7.13 (m, 3H), 7.01 (d, *J* = 7.4 Hz, 2H), 4.24 - 4.20 (m, 1H), 3.94 - 3.92 (m, 1H), 3.34 (s, 1H), 3.01 (s, 1H), 1.76 (s, 9H), 1.69 (s, 3H), 1.62 (s, 3H); <sup>13</sup>C NMR (100 MHz, CDCl<sub>3</sub>): δ 151.1, 143.8, 139.7, 138.7, 136.7, 127.1, 126.8, 126.4, 125.3, 122.8, 119.3, 118.0, 116.2, 114.9, 90.1, 83.8, 52.5, 28.4, 26.0, 24.8; HRMS (ESI<sup>+</sup>) [M+NH<sub>4</sub>]<sup>+</sup>: Calcd for: C<sub>28</sub>H<sub>35</sub>N<sub>2</sub>O<sub>4</sub>: 463.2591 m/z, found: 463.2585 m/z.

Enantiomeric purity of **7l-oxi** was determined by HPLC analysis in comparison with authentic racemic material (66:34 d.r., 96:4 e.r. shown; Chiralcel OZ-H column, 97:3 hexanes/ *i*PrOH, 0.8 mL/min, 254 nm).

&lt;Chromatogram&gt;

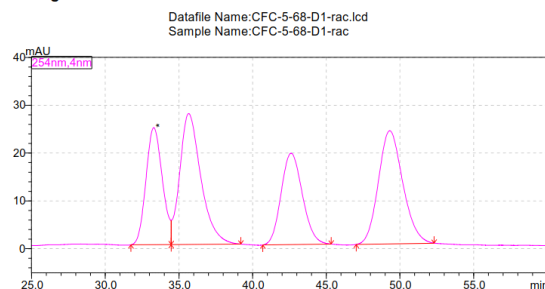

&lt;Peak Table&gt;

| Peak# | Ret. Time | Area    | Height | Area%   |
|-------|-----------|---------|--------|---------|
| 1     | 33.289    | 1892681 | 24480  | 20.408  |
| 2     | 35.663    | 2732673 | 27382  | 29.465  |
| 3     | 42.607    | 1920504 | 19112  | 20.708  |
| 4     | 49.310    | 2728566 | 23682  | 29.420  |
| Total |           | 9274424 | 94656  | 100.000 |

&lt;Chromatogram&gt;

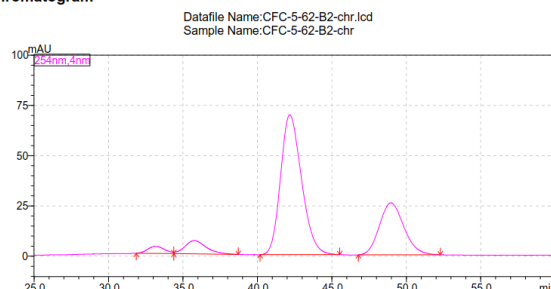

&lt;Peak Table&gt;

| Peak# | Ret. Time | Area     | Height | Area%   |
|-------|-----------|----------|--------|---------|
| 1     | 33.152    | 282962   | 3574   | 2.639   |
| 2     | 35.775    | 667886   | 6637   | 6.229   |
| 3     | 42.174    | 6814230  | 69628  | 63.550  |
| 4     | 48.961    | 2957579  | 25848  | 27.583  |
| Total |           | 10722657 | 105687 | 100.000 |

| Peak # | Time (min) | Area (%) | Peak # | Time (min) | Area (%) |
|--------|------------|----------|--------|------------|----------|
| 1      | 33.289     | 20.408   | 1      | 33.152     | 2.639    |
| 2      | 35.663     | 29.465   | 2      | 35.775     | 6.229    |
| 3      | 42.607     | 20.708   | 3      | 42.174     | 63.550   |
| 4      | 49.310     | 29.420   | 4      | 48.961     | 27.583   |

**(4*S*,5*S*)-4,5-Dimethyl-4-(naphthalen-2-yl)-5-phenyl-1,2-oxaborolan-2-ol (7m).** Yield: (57.5 mg, 91%); IR (neat): 3347 (br), 3056 (w), 2976 (m), 1423 (m), 1396 (m), 1298 (m), 1193 (m), 1059 (m), 1029 (m), 949 (m), 855 (m), 813 (s), 745 (s), 697 (s)  $\text{cm}^{-1}$ ;  $^1\text{H NMR}$  (400 MHz,  $\text{CDCl}_3$ ):  $\delta$  7.78 - 7.63 (m, 2H), 7.56 - 7.48 (m, 2H), 7.46 - 7.37 (m, 2H), 7.08 (d,  $J = 8.6$  Hz, 1H), 7.05 - 6.90 (m, 3H), 6.87 (d,  $J = 7.4$  Hz, 2H), 6.20 (s, 1H), 1.90 - 1.82 (m, 4H), 1.78 (s, 3H), 1.31 (d,  $J = 16.4$  Hz, 1H);  $^{13}\text{C NMR}$  (100 MHz,  $\text{CDCl}_3$ ):  $\delta$  143.7, 142.3, 132.7, 131.5, 128.0, 127.1, 127.1, 126.5, 126.3, 125.6, 125.4, 125.2, 90.1, 52.6, 25.6, 24.9; HRMS (ESI<sup>+</sup>)  $[\text{M}+\text{H}]^+$ : Calcd for:  $\text{C}_{21}\text{H}_{22}\text{BO}_2$ : 316.1744 m/z, found: 316.1740 m/z.

**(2*S*,3*S*)-2-Methyl-2-(naphthalen-2-yl)-3-phenylbutane-1,3-diol (7m-oxi).** Yield: (50.1 mg, 90%); IR (neat): 3320 (br), 2980 (m), 2934(m), 1597 (m), 1492 (s), 1444 (s), 1373 (s), 1275 (m), 1109 (m), 1022 (s), 919 (m), 868 (m), 853 (m), 758 (m), 747 (s), 701 (s), 626 (m)  $\text{cm}^{-1}$ ;  $^1\text{H NMR}$  (400 MHz,  $\text{CDCl}_3$ ):  $\delta$  7.79 (d,  $J = 8.4$  Hz, 1H), 7.70 - 7.61 (m, 2H), 7.49 - 7.41 (m, 3H), 7.24 - 7.11 (m, 4H), 6.98 (d,  $J = 7.6$  Hz, 2H), 4.18 (d,  $J = 10.8$  Hz, 1H), 3.93 (d,  $J = 10.8$  Hz, 1H), 3.37 (s, 1H), 3.00 (s, 1H), 1.68 (s, 3H), 1.61 (s, 3H);  $^{13}\text{C NMR}$  (100 MHz,  $\text{CDCl}_3$ ):  $\delta$  144.7, 139.2, 132.6, 132.0, 128.1, 127.8, 127.1, 126.9, 126.8, 126.8, 126.5, 125.9, 125.8, 79.9, 68.6, 49.7, 25.9, 19.2; HRMS (ESI<sup>+</sup>)  $[\text{M}+\text{NH}_4]^+$ : Calcd for:  $\text{C}_{21}\text{H}_{26}\text{NO}_2$ : 324.1958 m/z, found: 324.1955 m/z;

Enantiomeric purity of **7m-oxi** was determined by HPLC analysis in comparison with authentic racemic material (91:9 d.r., 99:1 e.r. shown; Chiralcel AD-H column, 97:3 hexanes/ *i*PrOH, 0.8 mL/min, 220 nm).

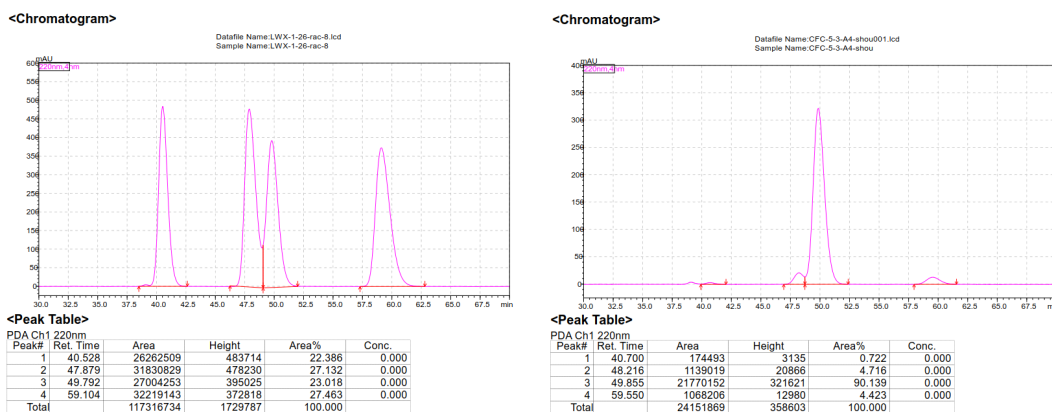

| Peak # | Time (min) | Area (%) | Peak # | Time (min) | Area (%) |
|--------|------------|----------|--------|------------|----------|
| 1      | 40.528     | 23.386   | 1      | 40.700     | 0.722    |
| 2      | 47.879     | 27.132   | 2      | 48.216     | 4.716    |
| 3      | 49.792     | 23.018   | 3      | 49.855     | 90.139   |
| 4      | 59.104     | 27.463   | 4      | 59.550     | 4.423    |

**(4*S*,5*S*)-4-(6-Methoxynaphthalen-2-yl)-4,5-dimethyl-5-phenyl-1,2-oxaborolan-2-ol (7n).** Yield: (51.2 mg, 74%); IR (neat): 3337 (br), 3058 (w), 2957 (w), 1631 (w), 1603 (m), 1422 (m), 1391 (s), 1302 (m), 1264 (s), 1206 (s), 1163 (m), 1096 (m), 1029 (s), 902 (s), 887 (m), 850 (m), 758 (s), 700 (s)  $\text{cm}^{-1}$ ;  $^1\text{H NMR}$  (400 MHz,  $\text{CDCl}_3$ ):  $\delta$  7.52 (d,  $J = 8.8$  Hz, 1H), 7.40 - 7.33 (m, 2H), 7.05 (d,  $J = 8.8$  Hz, 1H), 7.01 - 6.87 (m, 5H), 6.81 (d,  $J = 7.8$  Hz, 2H), 5.88 (s, 1H), 3.87 (s, 3H), 1.81 (s, 1H), 1.81 (d,  $J = 16.4$  Hz, 1H), 1.70 (s, 3H), 1.23 (d,  $J = 16.4$  Hz, 1H);  $^{13}\text{C NMR}$  (100 MHz,  $\text{CDCl}_3$ ):  $\delta$  157.3, 143.8, 140.0, 132.6, 129.5, 128.2, 127.0, 126.3, 126.2, 126.1, 125.4, 125.4, 125.3, 118.3, 105.1, 90.0, 55.2, 52.5, 25.6, 24.9; HRMS (ESI $^+$ ) [ $\text{M}+\text{H}$ ] $^+$ : Calcd for:  $\text{C}_{22}\text{H}_{24}\text{BO}_3$ : 346.1849 m/z, found: 346.1851 m/z.

**(2*S*,3*S*)-2-(6-Methoxynaphthalen-2-yl)-2-methyl-3-phenylbutane-1,3-diol (7n-oxi).** Yield: (43.8 mg, 88%); IR (neat): 3292 (br), 3057 (w), 2932 (m), 2835 (w), 1630 (m), 1601 (s), 1483 (m), 1446 (m), 1391 (m), 1263 (m), 1231 (s), 1200 (m), 1164 (m), 1110 (m), 1062 (m), 1024 (s), 926 (m), 907 (m), 848 (s), 762 (m), 704 (s), 678 (m)  $\text{cm}^{-1}$ ;  $^1\text{H NMR}$  (400 MHz,  $\text{CDCl}_3$ ):  $\delta$  7.60 - 7.53 (m, 2H), 7.24 - 7.18 (m, 2H), 7.18 - 7.06 (m, 5H), 6.99 (d,  $J = 7.4$  Hz, 2H), 4.16 (d,  $J = 11.0$  Hz, 1H), 3.98 - 3.88 (m, 4H), 3.16 (s, 1H), 2.78 (s, 1H), 1.67 (s, 3H), 1.61 (s, 3H);  $^{13}\text{C NMR}$  (100 MHz,  $\text{CDCl}_3$ ):  $\delta$  157.7, 144.7, 136.7, 133.1, 129.6, 128.1, 127.6, 127.3, 127.1, 126.9, 126.8, 125.5, 118.7, 105.0, 79.9, 68.7, 55.3, 49.6, 25.9, 19.2; HRMS (ESI $^+$ ) [ $\text{M}+\text{NH}_4$ ] $^+$ : Calcd for:  $\text{C}_{22}\text{H}_{28}\text{NO}_3$ : 354.2064 m/z, found: 354.2061 m/z.

Enantiomeric purity of **7n-oxi** was determined by HPLC analysis in comparison with authentic racemic material (88:12 d.r., >99:1 e.r. shown; Chiralcel IC column, 95:5 hexanes/ *i*PrOH, 0.8 mL/min, 220 nm).

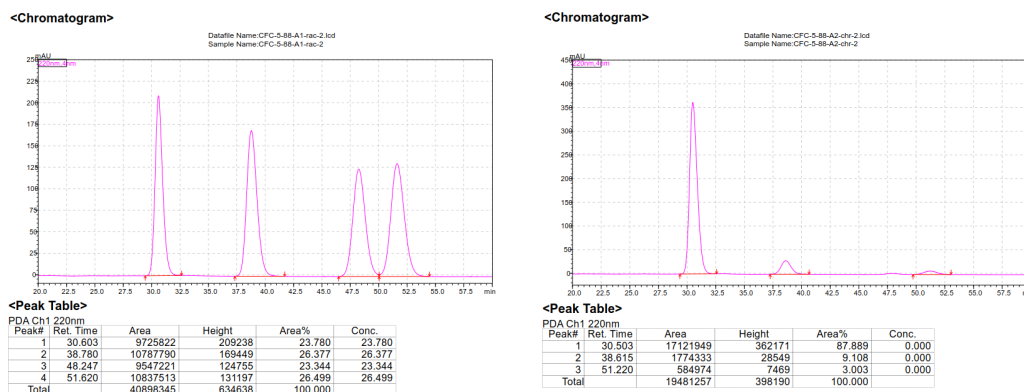

| Peak # | Time (min) | Area (%) | Peak # | Time (min) | Area (%) |
|--------|------------|----------|--------|------------|----------|
| 1      | 30.603     | 23.780   | 1      | 30.503     | 87.889   |
| 2      | 38.780     | 26.377   | 2      | 38.615     | 9.108    |
| 3      | 48.247     | 23.344   | 3      |            |          |
| 4      | 51.620     | 26.499   | 4      | 51.220     | 3.003    |

(*4S,5S*)-4-(6-(Dibenzylamino)naphthalen-2-yl)-4,5-dimethyl-5-phenyl-1,2-oxaborolan-2-ol (**7o**). **Yield:** (83.8 mg, 82%); **IR (neat):** 3355 (br), 3058 (w), 2928 (w), 1629 (w), 1599 (m), 1495 (m), 1450 (m), 1396 (s), 1298 (m), 1272 (m), 1206 (m), 1177 (m), 1097 (m), 1047 (m), 962 (m), 900 (m), 844 (m), 758 (s), 697 (s)  $\text{cm}^{-1}$ ;  **$^1\text{H}$  NMR (400 MHz,  $\text{CDCl}_3$ ):**  $\delta$  7.51 (d,  $J = 9.0$  Hz, 1H), 7.42 - 7.33 (m, 6H), 7.32 - 7.26 (m, 6H), 7.23 (d,  $J = 9.2$  Hz, 1H), 7.05 - 6.95 (m, 3H), 6.93 - 6.83 (m, 3H), 6.19 (s, 1H), 4.74 (s, 4H), 1.89 - 1.77 (m, 4H), 1.71 (s, 3H), 1.21 (d,  $J = 16.4$  Hz, 1H);  **$^{13}\text{C}$  NMR (100 MHz,  $\text{CDCl}_3$ ):**  $\delta$  146.9, 143.9, 138.5, 138.2, 133.1, 129.1, 128.6, 127.0, 126.9, 126.7, 126.7, 126.2, 126.0, 125.4, 125.2, 124.9, 115.7, 105.7, 90.0, 54.1, 52.3, 26.9, 25.7, 24.8; **HRMS (ESI<sup>+</sup>) [M+H]<sup>+</sup>:** Calcd for:  $\text{C}_{35}\text{H}_{35}\text{BNO}_2$ : 512.2756 m/z, found: 512.2758 m/z.

(*2S,3S*)-2-(6-(Dibenzylamino)naphthalen-2-yl)-2-methyl-3-phenylbutane-1,3-diol (**7o-oxi**). **Yield:** (65.7 mg, 80%); **IR (neat):** 3332 (br), 3026 (w), 2924 (m), 2851 (w), 1629 (m), 1598 (s), 1493 (s), 1449 (m), 1398 (m), 1357 (m), 1296 (m), 1200 (m), 1176 (m), 1110 (m), 1025 (s), 961 (m), 921 (m), 843 (m), 757 (m), 731 (s), 697 (s)  $\text{cm}^{-1}$ ;  **$^1\text{H}$  NMR (400 MHz,  $\text{CDCl}_3$ ):**  $\delta$  7.56 (d,  $J = 9.0$  Hz, 1H), 7.41 - 7.36 (m, 5H), 7.36 - 7.29 (m, 7H), 7.28 - 7.19 (m, 4H), 7.07 (d,  $J = 7.0$  Hz, 2H), 7.02 - 6.95 (m, 2H), 4.79 (s, 4H), 4.14 (d,  $J = 10.8$  Hz, 1H), 3.90 (d,  $J = 10.8$  Hz, 1H), 3.39 (s, 1H), 2.90 (s, 1H), 1.68 (s, 3H), 1.61 (s, 3H);  **$^{13}\text{C}$  NMR (100 MHz,  $\text{CDCl}_3$ ):**  $\delta$  147.2, 144.8, 138.3, 134.9, 133.5, 129.3, 128.6, 127.3, 127.2, 127.1, 126.9, 126.8, 126.6, 126.0, 124.9, 115.8, 105.3, 79.8, 68.6, 54.1, 49.5, 26.9, 25.9, 19.1; **HRMS (ESI<sup>+</sup>) [M+H]<sup>+</sup>:** Calcd for:  $\text{C}_{35}\text{H}_{36}\text{NO}_2$ : 502.2741 m/z, found: 502.2734 m/z.

Enantiomeric purity of **7o-oxi** was determined by HPLC analysis in comparison with authentic racemic material (86:14 d.r., >99:1 e.r. shown; Chiralcel OZ-H column, 94:6 hexanes/ *i*PrOH, 0.8 mL/min, 254 nm).

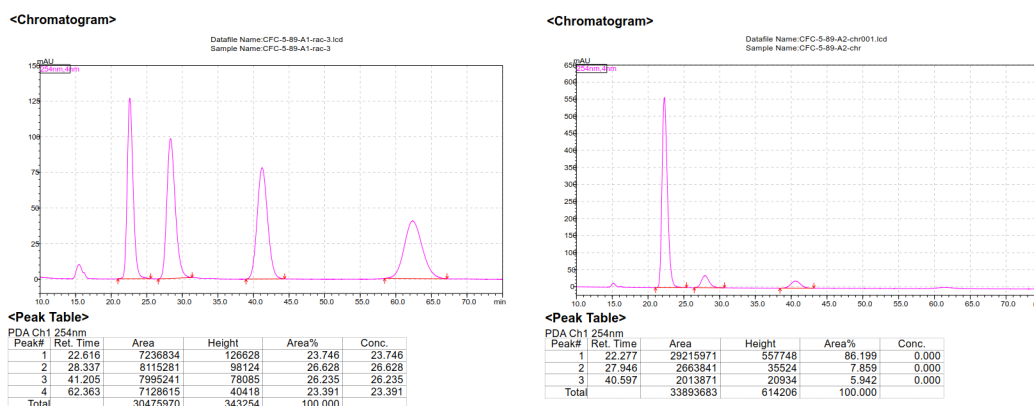

| Peak # | Time (min) | Area (%) | Peak # | Time (min) | Area (%) |
|--------|------------|----------|--------|------------|----------|
| 1      | 22.616     | 23.746   | 1      | 22.277     | 86.199   |
| 2      | 28.337     | 26.628   | 2      | 27.946     | 7.859    |
| 3      | 41.205     | 26.235   | 3      | 40.597     | 5.942    |
| 4      | 62.363     | 23.391   | 4      |            |          |

***tert*-Butyl 4-(6-((4*S*,5*S*)-2-hydroxy-4,5-dimethyl-5-phenyl-1,2-oxaborolan-4-yl)naphthalen-2-yl)piperazine-1-carboxylate (**7p**).** Yield: (85.0 mg, 85%); IR (neat): 3386 (br), 2975 (m), 2931 (w), 1672 (m), 1600 (m), 1449 (s), 1392 (m), 1321 (m), 1248 (s), 1204 (m), 1161 (s), 1127 (s), 1043 (m), 981 (m), 945 (m), 882 (m), 851 (m), 758 (s), 700 (s) cm<sup>-1</sup>; <sup>1</sup>H NMR (400 MHz, CDCl<sub>3</sub>): δ 7.54 (d, *J* = 9.0 Hz, 1H), 7.32 - 7.27 (m, 2H), 7.22 - 7.14 (m, 3H), 6.93 - 6.85 (m, 3H), 6.80 (d, *J* = 7.6 Hz, 2H), 6.45 (s, 1H), 3.67 - 3.61 (m, 4H), 3.21 - 3.14 (m, 4H), 1.78 (s, 3H), 1.78 (d, *J* = 16.2 Hz, 1H), 1.69 (s, 3H), 1.50 (s, 9H), 1.27 (d, *J* = 16.4 Hz, 1H); <sup>13</sup>C NMR (100 MHz, CDCl<sub>3</sub>): δ 154.7, 148.7, 144.9, 144.0, 140.5, 140.4, 132.7, 132.4, 129.0, 127.9, 127.0, 126.7, 125.3, 119.4, 110.2, 89.6, 79.9, 52.5, 49.8, 49.7, 28.4, 24.5, 24.2; HRMS (ESI<sup>+</sup>) [M+H]<sup>+</sup>: Calcd for: C<sub>30</sub>H<sub>38</sub>BN<sub>2</sub>O<sub>4</sub>: 501.2919 m/z, found: 501.2916 m/z.

***tert*-Butyl 4-(6-((2*S*,3*S*)-1,3-dihydroxy-2-methyl-3-phenylbutan-2-yl)naphthalen-2-yl)piperazine-1-carboxylate (**7p-oxi**).** Yield: (62.5 mg, 75%); IR (neat): 3369 (br), 2975 (m), 2931 (m), 2818 (w), 1673 (s), 1630 (m), 1599 (m), 1479 (m), 1421 (s), 1391 (s), 1366 (s), 1284 (m), 1249 (s), 1162 (s), 1124 (s), 1067 (m), 1028 (m), 965 (m), 920 (m), 859 (m), 760 (m), 703 (s), 684 (m) cm<sup>-1</sup>; <sup>1</sup>H NMR (400 MHz, CDCl<sub>3</sub>): δ 7.60 - 7.55 (m, 1H), 7.51 (d, *J* = 8.8 Hz, 1H), 7.33 (s, 1H), 7.24 - 7.18 (m, 2H), 7.17 - 7.12 (m, 2H), 7.10 - 7.04 (m, 2H), 6.99 (d, *J* = 7.6 Hz, 2H), 4.18 - 4.14 (m, 1H), 3.90 (d, *J* = 9.4 Hz, 1H), 3.67 - 3.57 (m, 4H), 3.41 (s, 1H), 3.26 - 3.16 (m, 4H), 3.00 (s, 1H), 1.66 (s, 3H), 1.59 (s, 3H), 1.50 (s, 9H); <sup>13</sup>C NMR (100 MHz, CDCl<sub>3</sub>): δ 154.7, 149.1, 144.8, 136.8, 133.0, 129.1, 127.8, 127.3, 127.2, 127.2,

127.0, 126.8, 126.7, 125.5, 119.7, 110.0, 80.0, 79.9, 68.6, 49.6, 49.5, 28.4, 25.9, 19.1; **HRMS (ESI<sup>+</sup>) [M+H]<sup>+</sup>**: Calcd for: C<sub>30</sub>H<sub>39</sub>N<sub>2</sub>O<sub>4</sub>: 491.2904 m/z, found: 491.2894 m/z.

Enantiomeric purity of **7p-oxi** was determined by HPLC analysis in comparison with authentic racemic material (88:12 d.r., 99:1 e.r. shown; Chiralcel OD-H column, 93:7 hexanes/ *i*PrOH, 0.8 mL/min, 254 nm).

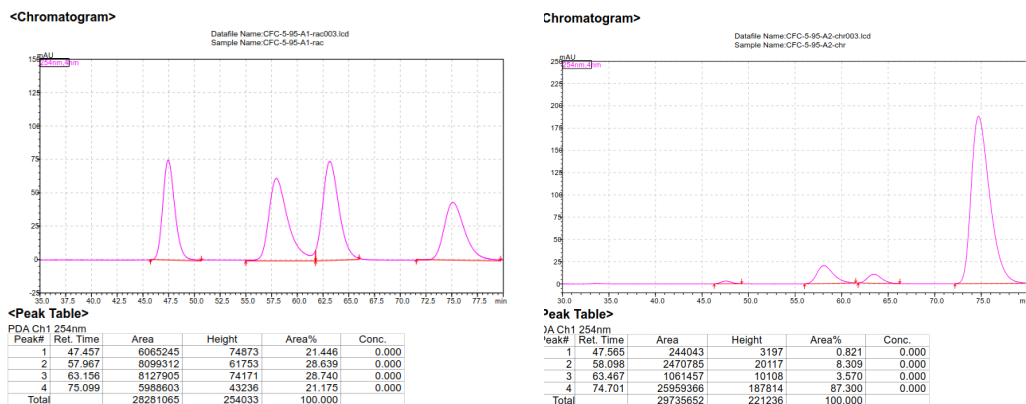

| Peak # | Time (min) | Area (%) | Peak # | Time (min) | Area (%) |
|--------|------------|----------|--------|------------|----------|
| 1      | 47.457     | 21.446   | 1      | 47.565     | 0.821    |
| 2      | 57.967     | 28.639   | 2      | 58.098     | 8.309    |
| 3      | 63.156     | 28.740   | 3      | 63.467     | 3.570    |
| 4      | 75.099     | 21.175   | 4      | 74.701     | 87.300   |

**(4*S*,5*S*)-4-(6-(1*H*-pyrrol-1-yl)naphthalen-2-yl)-4,5-dimethyl-5-phenyl-1,2-oxaborolan-2-ol (7q)**. Yield: (75.4 mg, 99%); **IR (neat)**: 3350 (br), 3058 (w), 2977 (w), 1603 (w), 1499 (m), 1424 (m), 1398 (m), 1322 (s), 1274 (m), 1142 (m), 1114 (m), 1065 (s), 1021 (m), 981 (w), 876 (m), 807 (m), 758 (m), 724 (s), 699 (s) cm<sup>-1</sup>; **<sup>1</sup>H NMR (400 MHz, CDCl<sub>3</sub>)**: δ 7.72 - 7.63 (m, 2H), 7.54 - 7.46 (m, 3H), 7.22 - 7.17 (m, 2H), 7.13 - 7.06 (m, 1H), 7.03 - 6.93 (m, 3H), 6.88 (d, *J* = 7.2 Hz, 2H), 6.42 (t, *J* = 2.0 Hz, 2H), 6.26 (s, 1H), 1.88 (s, 3H), 1.87 (d, *J* = 16.4 Hz, 1H), 1.77 (s, 1H), 1.32 (d, *J* = 16.4 Hz, 1H); **<sup>13</sup>C NMR (100 MHz, CDCl<sub>3</sub>)**: δ 143.6, 142.2, 137.8, 131.8, 130.7, 129.6, 127.1, 126.6, 126.3, 126.2, 125.4, 125.2, 119.8, 119.4, 116.6, 110.4, 90.0, 52.6, 25.5, 24.9; **HRMS (ESI<sup>+</sup>) [M+H]<sup>+</sup>**: Calcd for: C<sub>25</sub>H<sub>25</sub>BNO<sub>2</sub>: 382.1973 m/z, found: 382.1970 m/z.

**(2*S*,3*S*)-2-(6-(1*H*-pyrrol-1-yl)naphthalen-2-yl)-2-methyl-3-phenylbutane-1,3-diol (7q-oxi)**. Yield: (66.1 mg, 90%); **IR (neat)**: 3331 (br), 3057 (w), 2980 (m), 1633 (m), 1602 (m), 1497 (s), 1469 (m), 1445 (m), 1370 (m), 1322 (s), 1276 (w), 1112 (m), 1065 (s), 1020 (s), 870 (m), 808 (m), 759 (m), 723 (s), 702 (s), 668 (m) cm<sup>-1</sup>; **<sup>1</sup>H NMR (400 MHz, CDCl<sub>3</sub>)**: δ 7.75 - 7.69 (m, 2H), 7.64 (d, *J* = 8.8 Hz, 1H), 7.54 (dd, *J* = 8.8, 2.2 Hz, 1H), 7.44 (s, 1H), 7.25 - 7.12 (m, 6H), 6.99 (d, *J* = 7.6 Hz, 2H), 6.41 (t, *J* = 2.2 Hz, 2H), 4.20 (d, *J* = 10.8 Hz, 1H), 3.93 (d, *J* = 10.8 Hz, 1H), 3.54 (s, 1H), 3.20 (s, 1H), 1.68 (s, 3H), 1.63 (s, 3H); **<sup>13</sup>C NMR (100 MHz, CDCl<sub>3</sub>)**: δ 144.6, 139.2, 138.1, 132.3, 130.5, 129.8, 127.9, 127.6, 127.1, 126.9, 126.8, 126.1, 120.0, 119.4, 116.6,



110.5, 79.9, 68.6, 49.6, 24.7, 19.2; **HRMS (ESI<sup>+</sup>) [M+H]<sup>+</sup>**: Calcd for: C<sub>25</sub>H<sub>26</sub>NO<sub>2</sub>: 372.1958 m/z, found: 372.1953 m/z.

Enantiomeric purity of **7q-oxi** was determined by HPLC analysis in comparison with authentic racemic material (91:9 d.r., >99:1 e.r. shown; Chiralcel IC column, 95:5 hexanes/ *i*PrOH, 0.8 mL/min, 254 nm).

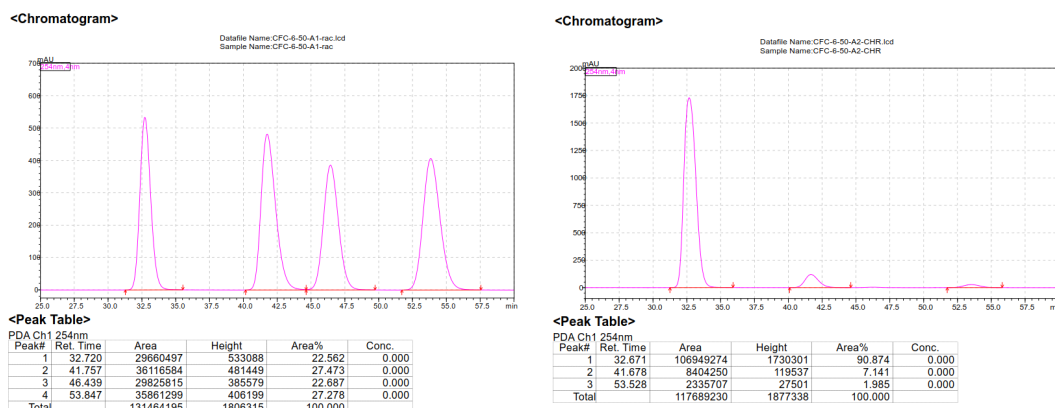

| Peak # | Time (min) | Area (%) | Peak # | Time (min) | Area (%) |
|--------|------------|----------|--------|------------|----------|
| 1      | 32.720     | 22.562   | 1      | 32.671     | 90.874   |
| 2      | 41.757     | 27.473   | 2      | 41.678     | 7.141    |
| 3      | 46.439     | 22.687   | 3      |            |          |
| 4      | 53.847     | 27.278   | 4      | 53.528     | 1.985    |

**(4*S*,5*S*)-4,5-Dimethyl-5-phenyl-4-(6-phenylnaphthalen-2-yl)-1,2-oxaborolan-2-ol (7r)**. **Yield:** (76.0 mg, 97%); **IR (neat):** 3349 (br), 3055 (w), 2975 (w), 1598 (w), 1493 (s), 1445 (m), 1397 (m), 1302 (m), 1266 (m), 1179 (m), 1134 (m), 1097 (m), 1063 (m), 956 (w), 898 (m), 847 (m), 755 (s), 697 (s) cm<sup>-1</sup>; **<sup>1</sup>H NMR (400 MHz, CDCl<sub>3</sub>):** δ 7.92 (s, 1H), 7.77 - 7.65 (m, 4H), 7.58 - 7.45 (m, 4H), 7.38 (t, *J* = 7.4 Hz, 1H), 7.11 - 7.05 (m, 1H), 7.04 - 6.93 (m, 3H), 6.91 - 6.85 (m, 2H), 6.08 (s, 1H), 1.93 - 1.83 (m, 4H), 1.77 (s, 3H), 1.31 (d, *J* = 16.4 Hz, 1H); **<sup>13</sup>C NMR (100 MHz, CDCl<sub>3</sub>):** δ 143.8, 142.6, 141.1, 138.1, 132.0, 131.8, 128.8, 128.6, 127.3, 127.2, 127.2, 126.9, 126.4, 126.1, 125.4, 125.3, 125.0, 90.1, 52.7, 25.7, 25.0; **HRMS (ESI<sup>+</sup>) [M+H]<sup>+</sup>**: Calcd for: C<sub>27</sub>H<sub>26</sub>BO<sub>2</sub>: 392.2057 m/z, found: 392.2060 m/z.

**(2*S*,3*S*)-2-Methyl-3-phenyl-2-(6-phenylnaphthalen-2-yl)butane-1,3-diol (7r-oxi)**. **Yield:** (63.0 mg, 85%); **IR (neat):** 3315 (br), 2980 (m), 2931 (w), 1597 (m), 1492 (m), 1445 (m), 1424 (m), 1373 (m), 1278 (w), 1110 (m), 1065 (m), 1021 (s), 893 (m), 816 (m), 756 (s), 699 (s) cm<sup>-1</sup>; **<sup>1</sup>H NMR (400 MHz, CDCl<sub>3</sub>):** δ 8.01 (s, 1H), 7.79 - 7.69 (m, 5H), 7.54 - 7.47 (m, 3H), 7.41 (t, *J* = 7.4 Hz, 1H), 7.28 - 7.15 (m, 4H), 7.03 (d, *J* = 7.4 Hz, 2H), 4.21 (d, *J* = 10.8 Hz, 1H), 3.95 (d, *J* = 10.8 Hz, 1H), 3.44 (s, 1H), 3.07 (s, 1H), 1.71 (s, 3H), 1.65 (s, 3H); **<sup>13</sup>C NMR (100 MHz, CDCl<sub>3</sub>):** δ 144.7, 141.1, 139.5, 138.6, 132.3, 131.8, 128.9, 128.7, 127.6, 127.4, 127.3,

127.2, 127.1, 127.0, 126.9, 126.9, 125.6, 125.1, 80.0, 68.7, 49.8, 26.0, 19.3; **HRMS (ESI<sup>+</sup>)** **[M+NH<sub>4</sub>]<sup>+</sup>**: Calcd for: C<sub>27</sub>H<sub>30</sub>NO<sub>2</sub>: 400.2271 m/z, found: 400.2269 m/z.

Enantiomeric purity of **7r-oxi** was determined by HPLC analysis in comparison with authentic racemic material (91:9 d.r., >99:1 e.r. shown; Chiralcel OZ-H column, 95:5 hexanes/ *i*PrOH, 0.8 mL/min, 254 nm).

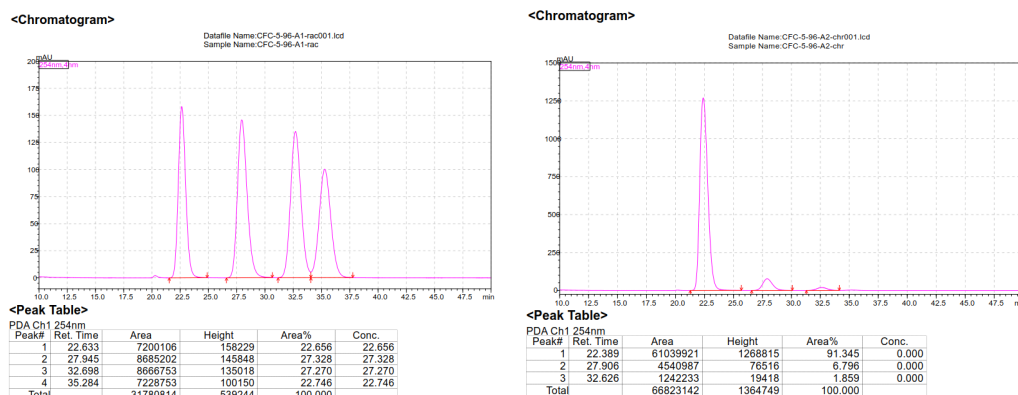

| Peak # | Time (min) | Area (%) | Peak # | Time (min) | Area (%) |
|--------|------------|----------|--------|------------|----------|
| 1      | 22.633     | 22.656   | 1      | 22.389     | 91.345   |
| 2      | 27.945     | 27.328   | 2      | 27.906     | 6.796    |
| 3      | 32.698     | 27.270   | 3      | 32.626     | 1.859    |
| 4      | 35.284     | 22.746   | 4      |            |          |

■ **Representative Experimental Procedure for Phosphine–Cu-Catalyzed Reactions of B<sub>2</sub>(pin)<sub>2</sub>, Alkene and Phenol Esters:** In a N<sub>2</sub>-filled glove-box, an oven-dried vial (4 mL, 17 × 38 mm) with a magnetic stir bar was charged with tricyclohexylphosphine (5.6 mg, 0.02 mmol, 10 mol %) or (*R,R*)-Ph-BPE (10.1 mg, 0.02 mmol, 10 mol %), CuCl (2.0 mg, 0.02 mmol, 10 mol%), Li*O*t-Bu (24.0 mg, 0.3 mmol, 1.5 equiv), 4Å molecular sieve (200 mg) and tetrahydrofuran (thf, 1 mL). The vessel was sealed with a cap (phenolic open top cap with red PTFE/white silicone septum) and the solution was allowed to stir at 22 °C for one hour. Bis(pinacolato)diboron (76.2 mg, 0.30 mmol, 1.5 equiv) was added to the solution, causing it to turn dark brown immediately. The vial was re-sealed with a cap (phenolic open top cap with red PTFE/white silicone septum). The mixture was allowed to stir at 22 °C for 30 min under an atmosphere of N<sub>2</sub>. Alkene **1a** (63.3 mg, 0.40 mmol, 2.0 equiv) and phenol esters (39.7 mg, 0.20 mmol, 1.0 equiv) were added. The resulting solution was allowed to stir at 22 °C for 16 h before the reaction was quenched by passing the mixture through a short plug of celite and silica gel and eluted with Et<sub>2</sub>O (3 × 2 mL). The filtrate was concentrated in vacuo to provide yellow oil. The crude was purified by silica gel chromatography (petroleum ether : ethyl acetate = 60:1) to afford **3a** as white solid (74.1 mg, 0.19 mmol, 95% yield).

■ **Characterization of product of 4a-4n.**

**(R)-2-(Benzofuran-2-yl)-2-methyl-1-phenyl-3-(4,4,5,5-tetramethyl-1,3,2-dioxaborolan-2-yl)propan-1-one (4a).** Yield: (60.8 mg, 78%); IR (neat): 2994 (w), 2972 (m), 2935 (m), 2886 (w), 1675 (s), 1577 (m), 1455 (m), 1390 (m), 1357 (s), 1315 (s), 1272 (m), 1252 (m), 1140 (s), 1109 (m), 1080 (m), 971 (s), 863 (m), 802 (m), 753 (s), 716 (s), 673 (m), 543 (m)  $\text{cm}^{-1}$ ;  $^1\text{H NMR}$  (400 MHz,  $\text{CDCl}_3$ ):  $\delta$  7.62 - 7.52 (m, 3H), 7.37 (dd,  $J = 12.8, 5.6$  Hz, 2H), 7.23 (dd,  $J = 10.6, 5.6$  Hz, 4H), 6.68 (s, 1H), 1.87 (s, 3H), 1.78 (d,  $J = 15.4$  Hz, 1H), 1.37 (d,  $J = 15.4$  Hz, 1H), 1.24 (s, 6H), 1.23 (s, 6H);  $^{13}\text{C NMR}$  (100 MHz,  $\text{CDCl}_3$ ):  $\delta$  201.3, 162.2, 154.6, 136.7, 131.7, 128.8, 128.5, 128.0, 123.8, 122.7, 120.7, 111.3, 101.8, 83.1, 50.7, 24.8, 24.7, 24.1;  $^{11}\text{B NMR}$  (128 MHz,  $\text{CDCl}_3$ ): 32.2; HRMS (ESI $^+$ )  $[\text{M}+\text{H}]^+$ : Calcd for  $\text{C}_{24}\text{H}_{28}\text{O}_4\text{B}$ : 390.2111 m/z, found: 390.2111 m/z; Specific rotation:  $[\alpha]_{\text{D}}^{20} -37.4$  ( $c$  1.00,  $\text{CHCl}_3$ ) for an enantiomerically enriched sample of 96.5:3.5 e.r.

Enantiomeric purity of **4a** was determined by HPLC analysis in comparison with authentic racemic material (96.5:3.5 e.r. shown; Chiralcel OZ-H column, 99:1 hexanes/ *i*PrOH, 0.5 mL/min, 254 nm).

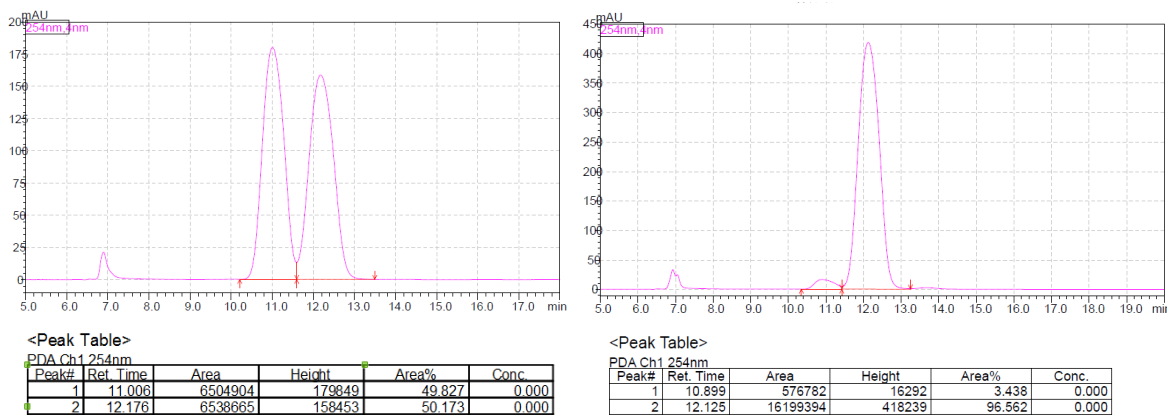

| Peak # | Time (min) | Area (%) | Peak # | Time (min) | Area (%) |
|--------|------------|----------|--------|------------|----------|
| 1      | 11.006     | 49.827   | 1      | 10.899     | 3.438    |
| 2      | 12.176     | 50.173   | 2      | 12.125     | 96.562   |

**(R)-2-(Benzofuran-2-yl)-2-methyl-3-(4,4,5,5-tetramethyl-1,3,2-dioxaborolan-2-yl)-1-(4-(trifluoromethyl)phenyl)propan-1-one (4b).** Yield: (60.4 mg, 66%); IR (neat): 2976 (m), 2936 (m), 1685 (m), 1576 (m), 1455 (m), 1359 (s), 1319 (s), 1271 (m), 1251 (m), 1216 (m), 1125 (s), 1065 (s), 1014 (m), 971 (s), 844 (s), 805 (m), 749 (s), 675 (m), 595 (m)  $\text{cm}^{-1}$ ;  $^1\text{H NMR}$  (400 MHz,  $\text{CDCl}_3$ ):  $\delta$  7.61 (d,  $J = 8.2$  Hz, 2H), 7.58 - 7.53 (m, 1H), 7.50 (d,  $J = 8.2$  Hz, 2H), 7.42 - 7.36 (m, 1H), 7.27 - 7.20 (m, 2H), 6.69 (s, 1H), 1.84 (s, 3H), 1.77 (d,  $J = 15.4$  Hz, 1H), 1.41 (d,  $J = 15.4$  Hz, 1H), 1.23 (s, 6H), 1.22 (s, 6H);  $^{13}\text{C NMR}$  (100 MHz,  $\text{CDCl}_3$ ):  $\delta$  200.8, 161.2, 154.7, 140.0, 132.8 (q,  $J = 32.0$  Hz), 128.8, 128.3, 125.1 (q,  $J = 4.0$  Hz), 124.1, 123.5 (q,  $J = 271.0$  Hz), 122.9, 120.8, 111.3, 102.3, 83.2, 50.7, 24.7, 23.9;  $^{19}\text{F NMR}$  (376 MHz,  $\text{CDCl}_3$ ):  $\delta$  -63.2; HRMS (ESI $^+$ )  $[\text{M}+\text{H}]^+$ : Calcd for  $\text{C}_{25}\text{H}_{27}\text{O}_4\text{BF}_3$ : 459.1943 m/z, found: 459.1949 m/z; Specific rotation:  $[\alpha]_{\text{D}}^{20} -32.6$  ( $c$  1.00,  $\text{CHCl}_3$ ) for an enantiomerically enriched sample of 96:4 e.r.

Enantiomeric purity of **4b** was determined by HPLC analysis in comparison with authentic racemic material (96:4 e.r. shown; Chiralcel OZ–H column, 99:1 hexanes/ *i*PrOH, 0.5 mL/min, 254 nm).

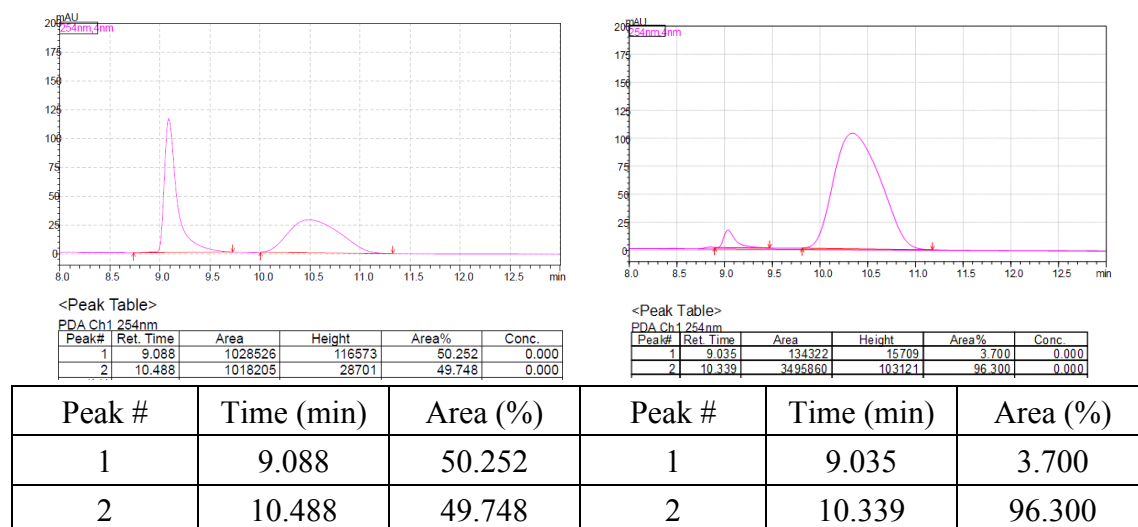

**(R)-2-(Benzofuran-2-yl)-1-(4-bromophenyl)-2-methyl-3-(4,4,5,5-tetramethyl-1,3,2-dioxaborolan-2-yl)propan-1-one (4c).** Yield: (72.1 mg, 77%); IR (neat): 2977 (m), 2927 (m), 1675 (m), 1582 (m), 1453 (m), 1351 (s), 1333 (s), 1270 (m), 1225 (m), 1195 (m), 1140 (s), 1071 (m), 1007 (w), 925 (m), 872 (m), 801 (m), 740 (s), 674 (m), 543 (m)  $\text{cm}^{-1}$ ;  $^1\text{H NMR}$  (400 MHz,  $\text{CDCl}_3$ ):  $\delta$  7.57 - 7.52 (m, 1H), 7.50 - 7.42 (m, 2H), 7.38 - 7.36 (m, 3H), 7.26 - 7.19 (m, 2H), 6.67 (s, 1H), 1.85 (s, 3H), 1.75 (d,  $J = 15.4$  Hz, 1H), 1.37 (d,  $J = 15.4$  Hz, 1H), 1.24 (s, 6H), 1.22 (s, 6H);  $^{13}\text{C NMR}$  (100 MHz,  $\text{CDCl}_3$ ):  $\delta$  200.2, 161.8, 154.6, 135.3, 131.3, 130.4, 128.4, 126.7, 124.0, 122.8, 120.8, 111.3, 102.0, 83.1, 50.6, 24.8, 24.7, 24.1; HRMS (ESI $^+$ )  $[\text{M}+\text{H}]^+$ : Calcd for  $\text{C}_{24}\text{H}_{27}\text{O}_4\text{BBr}$ : 468.1212 m/z, found: 468.1217 m/z; Specific rotation:  $[\alpha]_{\text{D}}^{20} -15.5$  ( $c$  1.00,  $\text{CHCl}_3$ ) for an enantiomerically enriched sample of 97:3 e.r.

Enantiomeric purity of **4c** was determined by HPLC analysis in comparison with authentic racemic material (97:3 e.r. shown; Chiralcel OZ–H column, 99:1 hexanes/ *i*PrOH, 0.5 mL/min, 254 nm).

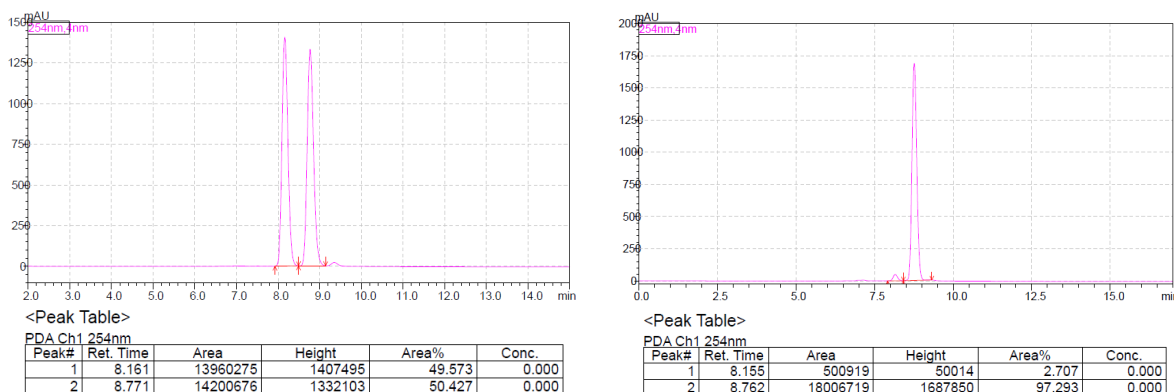

| Peak # | Time (min) | Area (%) | Peak # | Time (min) | Area (%) |
|--------|------------|----------|--------|------------|----------|
| 1      | 8.161      | 49.573   | 1      | 8.155      | 2.707    |
| 2      | 8.771      | 50.427   | 2      | 8.762      | 97.293   |

**2-(Benzofuran-2-yl)-1-(4-chlorophenyl)-2-methyl-3-(4,4,5,5-tetramethyl-1,3,2-dioxaborolan-2-yl)propan-1-one (4d).** Yield: (56.8 mg, 67%); IR (neat): 2978 (m), 2938 (m), 2896 (w), 1678 (s), 1581 (m), 1453 (m), 1388 (m), 1360 (s), 1312 (s), 1270 (m), 1248 (m), 1214 (m), 1139 (s), 1092 (m), 1046 (m), 971 (s), 938 (m), 865 (m), 802 (m), 746 (s), 675 (m), 543 (m)  $\text{cm}^{-1}$ ;  $^1\text{H NMR}$  (400 MHz,  $\text{CDCl}_3$ ):  $\delta$  7.59 - 7.50 (m, 3H), 7.40 - 7.34 (m, 1H), 7.23 - 7.19 (m, 4H), 6.67 (s, 1H), 1.84 (s, 3H), 1.74 (d,  $J = 15.4$  Hz, 1H), 1.36 (d,  $J = 15.5$  Hz, 1H), 1.23 (s, 6H), 1.21 (s, 6H);  $^{13}\text{C NMR}$  (100 MHz,  $\text{CDCl}_3$ ):  $\delta$  200.0, 161.9, 154.6, 138.1, 134.9, 130.3, 128.4, 128.3, 124.0, 122.8, 120.8, 111.3, 101.9, 83.1, 50.6, 24.8, 24.7, 24.1;  $^{11}\text{B NMR}$  (128 MHz,  $\text{CDCl}_3$ ): 32.3; HRMS (ESI<sup>+</sup>)  $[\text{M}+\text{H}]^+$ : Calcd for  $\text{C}_{24}\text{H}_{27}\text{O}_4\text{BCl}$ : 425.1682 m/z, found: 425.1685 m/z. Specific rotation:  $[\alpha]_{\text{D}}^{20} -21.3$  ( $c$  1.00,  $\text{CHCl}_3$ ) for an enantiomerically enriched sample of 91:9 e.r.

Enantiomeric purity of **4d** was determined by HPLC analysis in comparison with authentic racemic material (91:9 e.r. shown; Chiralcel IC column, 99:1 hexanes/ *i*PrOH, 0.5 mL/min, 254 nm).

&lt;Chromatogram&gt;

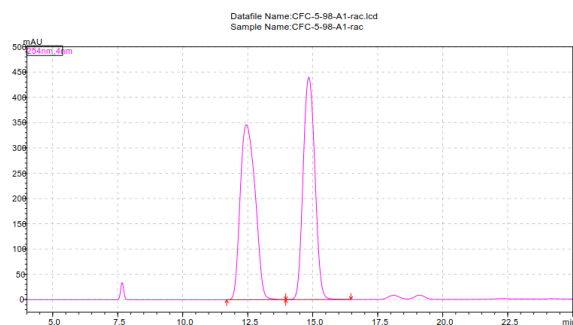

&lt;Peak Table&gt;

| Peak# | Ret. Time | Area     | Height | Area%   | Conc. |
|-------|-----------|----------|--------|---------|-------|
| 1     | 12.447    | 13857012 | 346323 | 49.990  | 0.000 |
| 2     | 14.848    | 13862512 | 439685 | 50.010  | 0.000 |
| Total |           | 27719524 | 786007 | 100.000 |       |

&lt;Chromatogram&gt;

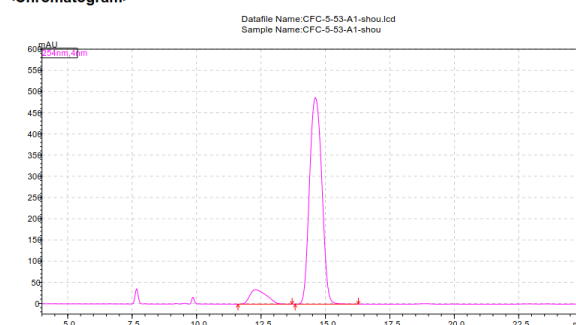

&lt;Peak Table&gt;

| Peak# | Ret. Time | Area     | Height | Area%   | Conc. |
|-------|-----------|----------|--------|---------|-------|
| 1     | 12.290    | 1532505  | 33905  | 8.656   | 0.000 |
| 2     | 14.611    | 16171741 | 487077 | 91.344  | 0.000 |
| Total |           | 17704246 | 520983 | 100.000 |       |

| Peak # | Time (min) | Area (%) | Peak # | Time (min) | Area (%) |
|--------|------------|----------|--------|------------|----------|
| 1      | 12.447     | 49.990   | 1      | 12.290     | 8.656    |
| 2      | 14.848     | 50.010   | 2      | 14.611     | 91.344   |

**(R)-2-(Benzofuran-2-yl)-1-(4-fluorophenyl)-2-methyl-3-(4,4,5,5-tetramethyl-1,3,2-dioxaborolan-2-yl)propan-1-one (4e).** Yield: (62.0 mg, 78%); IR (neat): 2978 (m), 2927 (m), 1678 (s), 1596 (s), 1503 (m), 1453 (m), 1355 (s), 1312 (s), 1237 (s), 1140 (s), 1039 (w), 971 (s), 945 (m), 844 (s), 802 (s), 747 (s), 678 (m), 613 (m), 578 (m), 504 (m)  $\text{cm}^{-1}$ ;  $^1\text{H NMR}$  (400 MHz,  $\text{CDCl}_3$ ):  $\delta$  7.65 (dd,  $J = 8.8, 5.6$  Hz, 2H), 7.55 (dd,  $J = 5.0, 4.0$  Hz, 1H), 7.41 - 7.32 (m, 1H), 7.25 - 7.18 (m, 2H), 6.90 (t,  $J = 8.6$  Hz, 2H), 6.68 (s, 1H), 1.86 (s, 3H), 1.75 (d,  $J =$

15.4 Hz, 1H), 1.35 (d,  $J = 15.4$  Hz, 1H), 1.23 (s, 6H), 1.21 (s, 6H);  $^{13}\text{C}$  NMR (100 MHz,  $\text{CDCl}_3$ ):  $\delta$  199.5, 164.7(d,  $J = 254.4$  Hz), 162.1, 154.6, 132.73 (d,  $J = 3.2$  Hz), 131.54 (d,  $J = 9.0$  Hz), 128.4, 123.9, 122.8, 120.8, 115.2 (d,  $J = 21.0$  Hz), 111.3, 101.8, 83.1, 50.6, 24.8, 24.7, 24.2;  $^{19}\text{F}$  NMR (376 MHz,  $\text{CDCl}_3$ ):  $\delta$  -106.8; HRMS (ESI<sup>+</sup>)  $[\text{M}+\text{H}]^+$ : Calcd for  $\text{C}_{24}\text{H}_{27}\text{O}_4\text{BF}$ : 409.1984 m/z, found: 409.1981 m/z; Specific rotation:  $[\alpha]_{\text{D}}^{20}$  -29.7 ( $c$  1.00,  $\text{CHCl}_3$ ) for an enantiomerically enriched sample of 98:2 e.r.

Enantiomeric purity of **4e** was determined by HPLC analysis in comparison with authentic racemic material (98:2 e.r. shown; Chiralcel OZ-H column, 99:1 hexanes/ *i*PrOH, 0.5 mL/min, 254 nm).

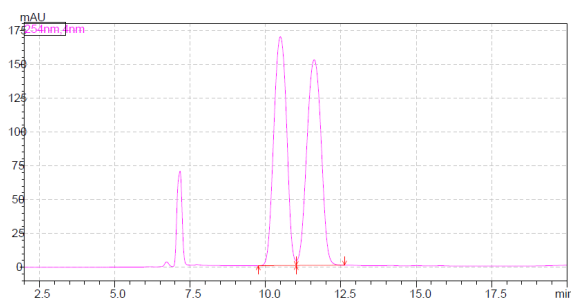

<Peak Table>

| Peak# | Ret. Time | Area    | Height | Area%  | Conc.  |
|-------|-----------|---------|--------|--------|--------|
| 1     | 10.492    | 5008007 | 169039 | 49.892 | 49.892 |
| 2     | 11.613    | 5029708 | 151943 | 50.108 | 50.108 |

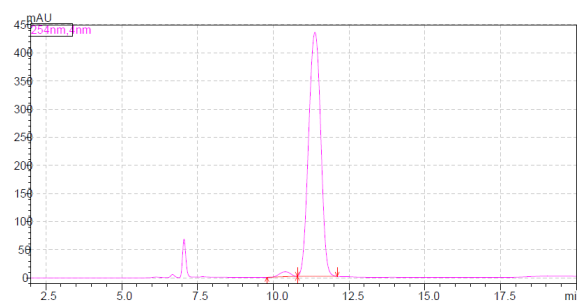

<Peak Table>

| Peak# | Ret. Time | Area     | Height | Area%  | Conc. |
|-------|-----------|----------|--------|--------|-------|
| 1     | 10.395    | 209776   | 8578   | 1.716  | 0.000 |
| 2     | 11.373    | 12017539 | 433631 | 98.284 | 0.000 |

| Peak # | Time (min) | Area (%) | Peak # | Time (min) | Area (%) |
|--------|------------|----------|--------|------------|----------|
| 1      | 10.492     | 49.892   | 1      | 10.395     | 1.716    |
| 2      | 11.613     | 50.108   | 2      | 11.373     | 98.284   |

**(R)-Methyl 3-(2-(benzofuran-2-yl)-2-methyl-3-(4,4,5,5-tetramethyl-1,3,2-dioxaborolan-2-yl)propanoyl)benzoate (4f)**. Yield: (61.8 mg, 69%); IR (neat): 2977 (m), 2933 (m), 1725 (s), 1682 (s), 1599 (m), 1452 (m), 1357 (s), 1300 (s), 1232 (s), 1140 (s), 1108 (m), 1045 (m), 966 (m), 881 (m), 805 (m), 733 (s), 543 (m)  $\text{cm}^{-1}$ ;  $^1\text{H}$  NMR (400 MHz,  $\text{CDCl}_3$ ):  $\delta$  8.21 (t,  $J = 1.6$  Hz, 1H), 8.05 - 7.99 (m, 1H), 7.69 - 7.63 (m, 1H), 7.57 - 7.51 (m, 1H), 7.39 - 7.37 (m, 1H), 7.30 (t,  $J = 7.8$  Hz, 1H), 7.25 - 7.18 (m, 2H), 6.69 (s, 1H), 3.78 (s, 3H), 1.84 (s, 3H), 1.76 (d,  $J = 15.4$  Hz, 1H), 1.40 (d,  $J = 15.4$  Hz, 1H), 1.22 (s, 6H), 1.21 (s, 6H);  $^{13}\text{C}$  NMR (100 MHz,  $\text{CDCl}_3$ ):  $\delta$  201.0, 166.2, 161.5, 154.6, 137.2, 132.6, 132.4, 130.1, 130.0, 128.5, 128.2, 123.9, 122.8, 120.8, 111.3, 102.4, 83.2, 52.1, 50.7, 24.8, 24.0; HRMS (ESI<sup>+</sup>)  $[\text{M}+\text{H}]^+$ : Calcd for  $\text{C}_{26}\text{H}_{30}\text{O}_6\text{B}$ : 448.2161 m/z, found: 448.2166 m/z; Specific rotation:  $[\alpha]_{\text{D}}^{20}$  -26.2 ( $c$  1.00,  $\text{CHCl}_3$ ) for an enantiomerically enriched sample of 94:6 e.r.

Enantiomeric purity of **4f** was determined by HPLC analysis in comparison with authentic racemic material (94:6 e.r. shown; Chiralcel OZ-H column, 99:1 hexanes/ *i*PrOH, 0.5 mL/min, 220 nm).

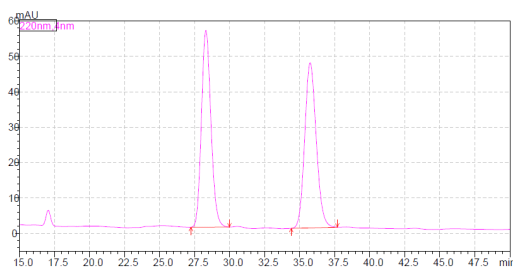

| <Peak Table> |           |         |        |        |        |
|--------------|-----------|---------|--------|--------|--------|
| Peak#        | Ret. Time | Area    | Height | Area%  | Conc.  |
| 1            | 28.303    | 2627456 | 55621  | 49.557 | 49.557 |
| 2            | 35.743    | 2674423 | 46637  | 50.443 | 50.443 |

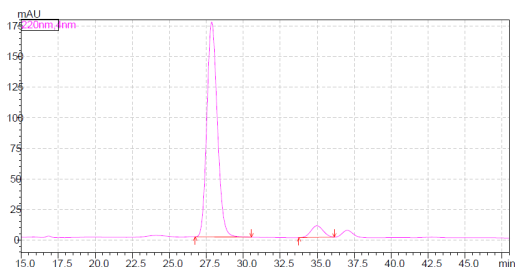

| <Peak Table> |           |         |        |        |        |
|--------------|-----------|---------|--------|--------|--------|
| Peak#        | Ret. Time | Area    | Height | Area%  | Conc.  |
| 1            | 27.871    | 8680467 | 175926 | 94.043 | 94.043 |
| 2            | 34.984    | 549834  | 9506   | 5.957  | 5.957  |

| Peak # | Time (min) | Area (%) | Peak # | Time (min) | Area (%) |
|--------|------------|----------|--------|------------|----------|
| 1      | 28.303     | 49.557   | 1      | 27.871     | 94.043   |
| 2      | 35.743     | 50.443   | 2      | 34.984     | 5.957    |

**(R)-2-(Benzofuran-2-yl)-1-(4-methoxyphenyl)-2-methyl-3-(4,4,5,5-tetramethyl-1,3,2-dioxaborolan-2-yl)propan-1-one (4g).** Yield: (69.7 mg, 83%); IR (neat): 2975 (m), 2931 (m), 2844 (w), 1668 (s), 1598 (s), 1574 (m), 1509 (m), 1454 (m), 1417 (s), 1355 (s), 1312 (s), 1251 (s), 1219 (m), 1170 (s), 1141 (s), 1031 (m), 971 (s), 878 (m), 842 (s), 802 (m), 747 (s), 675 (m), 616 (m), 539 (m)  $\text{cm}^{-1}$ ;  $^1\text{H NMR}$  (400 MHz,  $\text{CDCl}_3$ ):  $\delta$  7.69 (d,  $J = 8.8$  Hz, 2H), 7.53 (dd,  $J = 8.2, 4.4$  Hz, 1H), 7.37 (dd,  $J = 8.2, 4.6$  Hz, 1H), 7.24 - 7.17 (m, 2H), 6.72 (d,  $J = 8.8$  Hz, 2H), 6.66 (s, 1H), 3.74 (s, 3H), 1.89 (s, 3H), 1.74 (d,  $J = 15.4$  Hz, 1H), 1.30 (d,  $J = 15.4$  Hz, 1H), 1.25 (s, 6H), 1.23 (s, 6H);  $^{13}\text{C NMR}$  (100 MHz,  $\text{CDCl}_3$ ):  $\delta$  199.1, 162.9, 162.5, 154.6, 131.5, 128.7, 128.6, 123.7, 122.6, 120.7, 113.3, 111.3, 101.4, 82.9, 55.3, 50.7, 24.9, 24.8, 24.4; HRMS (ESI<sup>+</sup>)  $[\text{M}+\text{H}]^+$ : Calcd for  $\text{C}_{25}\text{H}_{30}\text{O}_5\text{B}$ : 420.2214 m/z, found: 420.2217 m/z; Specific rotation:  $[\alpha]_{\text{D}}^{20} - 8.3$  (c 1.00,  $\text{CHCl}_3$ ) for an enantiomerically enriched sample of 89:11 e.r.

Enantiomeric purity of **4g** was determined by HPLC analysis in comparison with authentic racemic material (89:11 e.r. shown; Chiralcel OZ-H column, 99:1 hexanes/ *i*PrOH, 0.5 mL/min, 254 nm).

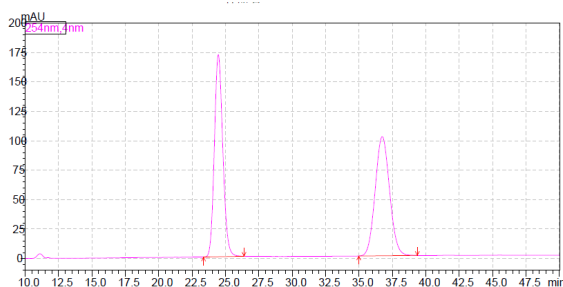

| <Peak Table> |           |         |        |        |        |
|--------------|-----------|---------|--------|--------|--------|
| Peak#        | Ret. Time | Area    | Height | Area%  | Conc.  |
| 1            | 24.465    | 7528695 | 171605 | 49.814 | 49.814 |
| 2            | 36.731    | 7584994 | 101251 | 50.186 | 50.186 |

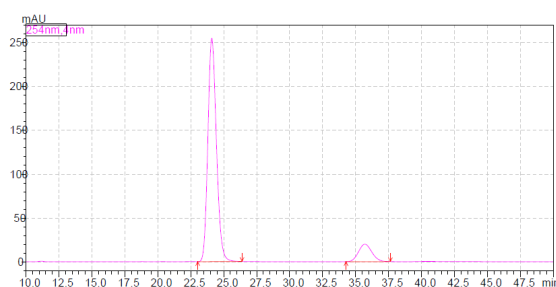

| <Peak Table> |           |          |        |        |       |
|--------------|-----------|----------|--------|--------|-------|
| Peak#        | Ret. Time | Area     | Height | Area%  | Conc. |
| 1            | 24.093    | 11443522 | 254119 | 89.077 | 0.000 |
| 2            | 35.700    | 1403289  | 19939  | 10.923 | 0.000 |

| Peak # | Time (min) | Area (%) | Peak # | Time (min) | Area (%) |
|--------|------------|----------|--------|------------|----------|
| 1      | 24.465     | 49.814   | 1      | 24.093     | 89.077   |

|   |        |        |   |        |        |
|---|--------|--------|---|--------|--------|
| 2 | 36.731 | 50.186 | 2 | 35.700 | 10.923 |
|---|--------|--------|---|--------|--------|

**2-(Benzofuran-2-yl)-2-methyl-3-(4,4,5,5-tetramethyl-1,3,2-dioxaborolan-2-yl)-1-(*p*-tolyl)propan-1-one (4h).** Yield: (53.3 mg, 66%); IR (neat): 2973 (m), 2927 (w), 1672 (s), 1606 (m), 1453 (m), 1352 (s), 1309 (s), 1251 (m), 1214 (m), 1176 (m), 1139 (s), 1038 (m), 978 (m), 845 (m), 804 (m), 738 (s), 679 (m), 542(m)  $\text{cm}^{-1}$ ;  $^1\text{H NMR}$  (400 MHz,  $\text{CDCl}_3$ ):  $\delta$  7.59 - 7.51 (m, 3H), 7.40 - 7.34 (m, 1H), 7.24 - 7.17 (m, 2H), 7.03 (d,  $J = 8.0$  Hz, 2H), 6.67 (s, 1H), 2.28 (s, 3H), 1.89 (s, 3H), 1.77 (d,  $J = 15.4$  Hz, 1H), 1.34 (d,  $J = 15.4$  Hz, 1H), 1.25 (s, 6H), 1.23 (s, 6H);  $^{13}\text{C NMR}$  (100 MHz,  $\text{CDCl}_3$ ):  $\delta$  200.5, 162.6, 154.6, 142.5, 133.7, 129.1, 128.8, 128.6, 123.7, 122.7, 120.7, 111.3, 101.6, 82.9, 50.7, 24.9, 24.7, 24.2, 21.5; HRMS ( $\text{ESI}^+$ )  $[\text{M}+\text{H}]^+$ : Calcd for  $\text{C}_{25}\text{H}_{30}\text{O}_4\text{B}$ : 404.2260 m/z, found: 404.2268 m/z. Specific rotation:  $[\alpha]_{\text{D}}^{20} -39.2$  ( $c$  1.00,  $\text{CHCl}_3$ ) for an enantiomerically enriched sample of 93:7 e.r.

Enantiomeric purity of **4h** was determined by HPLC analysis in comparison with authentic racemic material (93:7 e.r. shown; Chiralcel OZ-H column, 99:1 hexanes/ *i*PrOH, 0.5 mL/min, 254 nm).

&lt;Chromatogram&gt;

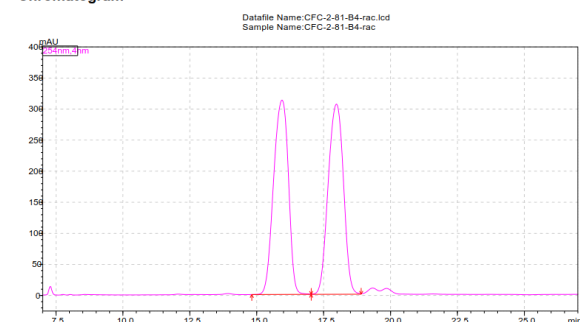

&lt;Peak Table&gt;

| Peak# | Ret. Time | Area     | Height | Area%   | Conc. |
|-------|-----------|----------|--------|---------|-------|
| 1     | 15.944    | 12078938 | 312836 | 49.785  | 0.000 |
| 2     | 17.978    | 12183022 | 306075 | 50.215  | 0.000 |
| Total |           | 24261960 | 618911 | 100.000 |       |

&lt;Chromatogram&gt;

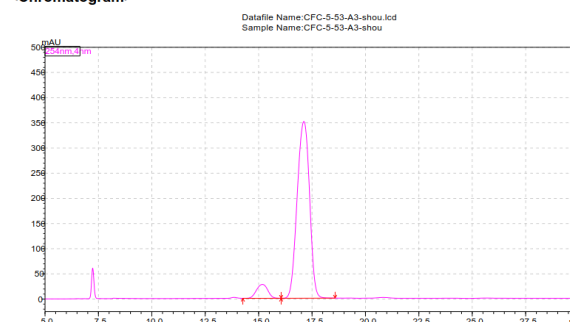

&lt;Peak Table&gt;

| Peak# | Ret. Time | Area     | Height | Area%   | Conc. |
|-------|-----------|----------|--------|---------|-------|
| 1     | 15.177    | 1014841  | 27561  | 6.714   | 0.000 |
| 2     | 17.116    | 14101859 | 350839 | 93.286  | 0.000 |
| Total |           | 15116000 | 378400 | 100.000 |       |

| Peak # | Time (min) | Area (%) | Peak # | Time (min) | Area (%) |
|--------|------------|----------|--------|------------|----------|
| 1      | 15.944     | 49.785   | 1      | 15.177     | 6.714    |
| 2      | 17.978     | 50.215   | 2      | 17.116     | 93.286   |

**2-(Benzofuran-2-yl)-1-(3-methoxyphenyl)-2-methyl-3-(4,4,5,5-tetramethyl-1,3,2-dioxaborolan-2-yl)propan-1-one (4i).** Yield: (42.8 mg, 51%); IR (neat): 2977 (m), 2934 (m), 1672 (s), 1575 (m), 1433 (m), 1351 (m), 1315 (s), 1258 (s), 1218 (s), 1140 (s), 1053 (m), 999 (s), 886 (m), 823 (m), 793 (m), 741 (s), 691 (m), 550 (m)  $\text{cm}^{-1}$ ;  $^1\text{H NMR}$  (400 MHz,  $\text{CDCl}_3$ ):  $\delta$  7.56 - 7.51 (m, 1H), 7.39 - 7.37 (m, 1H), 7.25 - 7.18 (m, 2H), 7.16 - 7.09 (m, 3H), 6.93 - 6.89 (m, 1H), 6.68 (s, 1H), 3.59 (s, 3H), 1.87 (s, 3H), 1.78 (d,  $J = 15.4$  Hz, 1H), 1.37 (d,  $J = 15.4$  Hz, 1H), 1.25 (s, 6H), 1.23 (s, 6H);  $^{13}\text{C NMR}$  (100 MHz,  $\text{CDCl}_3$ ):  $\delta$  201.2, 162.2, 159.1, 154.6, 137.9, 129.0, 128.5, 123.8, 122.7, 121.2, 120.7, 118.3, 113.1, 111.3, 101.9, 83.0, 55.0, 50.8, 24.8, 24.7, 24.0; HRMS ( $\text{ESI}^+$ )  $[\text{M}+\text{H}]^+$ : Calcd for  $\text{C}_{25}\text{H}_{30}\text{O}_5\text{B}$ : 421.2175 m/z, found: 421.2181 m/z. Specific rotation:  $[\alpha]_{\text{D}}^{20} -42.7$  ( $c$  1.00,  $\text{CHCl}_3$ ) for an enantiomerically enriched sample of 96:4 e.r.



Enantiomeric purity of **4i** was determined by HPLC analysis in comparison with authentic racemic material (96:4 e.r. shown; Chiralcel OZ–H column, 99:1 hexanes/ *i*PrOH, 0.5 mL/min, 254 nm).

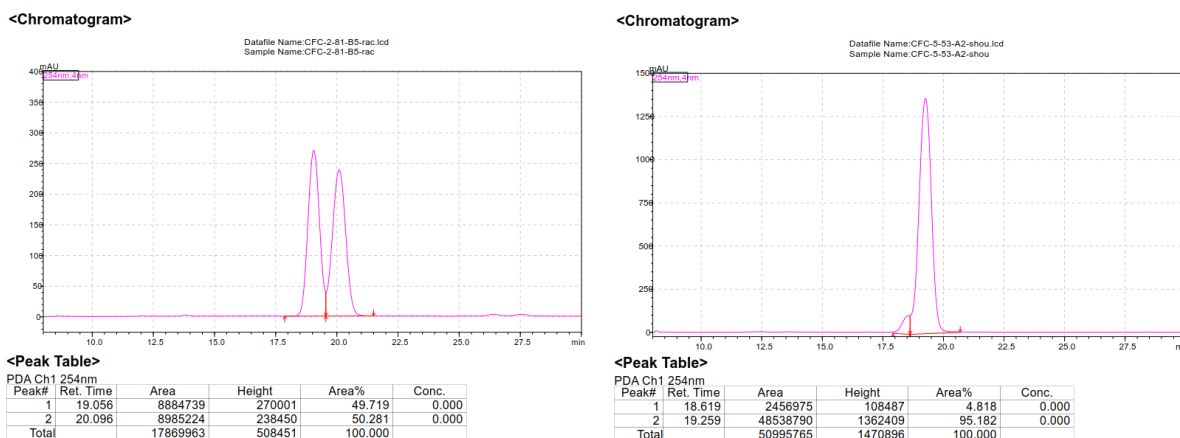

| Peak # | Time (min) | Area (%) | Peak # | Time (min) | Area (%) |
|--------|------------|----------|--------|------------|----------|
| 1      | 19.056     | 49.719   | 1      | 18.619     | 4.818    |
| 2      | 20.096     | 50.281   | 2      | 19.259     | 95.182   |

**2-(Benzofuran-2-yl)-2-methyl-1-(naphthalen-2-yl)-3-(4,4,5,5-tetramethyl-1,3,2-dioxaborolan-2-yl)propan-1-one (4j).** Yield: (44.9 mg, 51%); IR (neat): 2970 (m), 2921 (m), 2851 (w), 1677 (m), 1625 (w), 1576 (w), 1453 (m), 1351 (s), 1310 (s), 1254 (m), 1140 (s), 1002 (m), 845 (m), 824 (m), 744 (s), 688 (m), 542 (m)  $\text{cm}^{-1}$ ;  $^1\text{H NMR}$  (400 MHz,  $\text{CDCl}_3$ ):  $\delta$  8.12 (s, 1H), 7.79 - 7.64 (m, 4H), 7.60 - 7.55 (m, 1H), 7.47 - 7.51 (m, 1H), 7.45 - 7.35 (m, 2H), 7.25 - 7.20 (m, 2H), 6.75 (s, 1H), 1.95 (s, 3H), 1.85 (d,  $J = 15.4$  Hz, 1H), 1.44 (d,  $J = 15.4$  Hz, 1H), 1.25 (s, 6H), 1.24 (s, 6H);  $^{13}\text{C NMR}$  (100 MHz,  $\text{CDCl}_3$ ):  $\delta$  201.2, 162.3, 154.6, 134.6, 133.9, 132.2, 130.0, 129.4, 128.5, 127.9, 127.6, 127.4, 126.3, 125.1, 123.8, 122.7, 120.7, 111.3, 101.9, 83.0, 50.9, 24.8, 24.7, 24.3; HRMS (ESI<sup>+</sup>)  $[\text{M}+\text{H}]^+$ : Calcd for  $\text{C}_{28}\text{H}_{30}\text{O}_4\text{B}$ : 441.2227 m/z, found: 441.2232 m/z. Specific rotation:  $[\alpha]_{\text{D}}^{20} -2.7$  ( $c$  1.00,  $\text{CHCl}_3$ ) for an enantiomerically enriched sample of 96:4 e.r.

Enantiomeric purity of **4j** was determined by HPLC analysis in comparison with authentic racemic material (96:4 e.r. shown; Chiralcel OZ–H column, 99:1 hexanes/ *i*PrOH, 0.5 mL/min, 254 nm).

&lt;Chromatogram&gt;

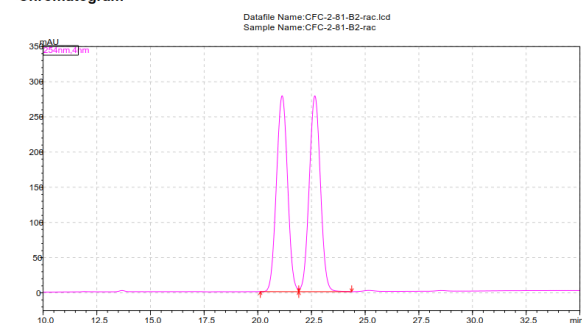

&lt;Peak Table&gt;

| Peak# | Ret. Time | Area     | Height | Area%   | Conc. |
|-------|-----------|----------|--------|---------|-------|
| 1     | 21.131    | 10039224 | 278334 | 49.837  | 0.000 |
| 2     | 22.656    | 10104778 | 278266 | 50.163  | 0.000 |
| Total |           | 20144002 | 556600 | 100.000 |       |

&lt;Chromatogram&gt;

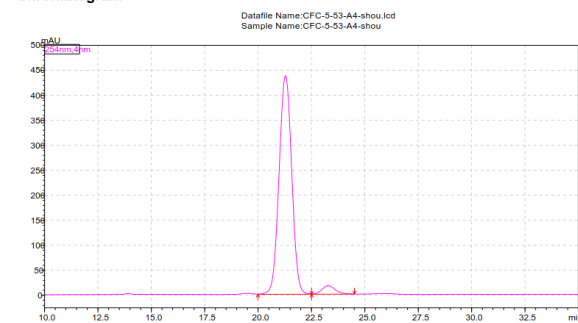

&lt;Peak Table&gt;

| Peak# | Ret. Time | Area     | Height | Area%   | Conc. |
|-------|-----------|----------|--------|---------|-------|
| 1     | 21.282    | 17984969 | 437086 | 96.005  | 0.000 |
| 2     | 23.282    | 748334   | 17092  | 3.995   | 0.000 |
| Total |           | 18733303 | 454178 | 100.000 |       |

| Peak # | Time (min) | Area (%) | Peak # | Time (min) | Area (%) |
|--------|------------|----------|--------|------------|----------|
| 1      | 21.131     | 49.837   | 1      | 21.282     | 96.005   |
| 2      | 22.656     | 50.163   | 2      | 23.282     | 3.995    |

**2-(Benzofuran-2-yl)-1-(furan-3-yl)-2-methyl-3-(4,4,5,5-tetramethyl-1,3,2-dioxaborolan-2-yl)propan-1-one (4k).** Yield: (41.8 mg, 55%); IR (neat): 2974 (m), 2920 (m), 2870 (w), 1669 (m), 1553 (w), 1502 (m), 1455 (m), 1355 (s), 1315 (s), 1214 (m), 1142 (s), 1080 (w), 1025 (m), 968 (m), 862 (s), 800 (m), 740 (s), 694 (m), 540 (m)  $\text{cm}^{-1}$ ;  $^1\text{H NMR}$  (400 MHz,  $\text{CDCl}_3$ ):  $\delta$  7.57 - 7.52 (m, 1H), 7.48 (m, 1H), 7.39 - 7.37 (m, 1H), 7.26 - 7.18 (m, 3H), 6.72 (s, 1H), 6.61 (dd,  $J = 1.8, 0.8$  Hz, 1H), 1.84 (s, 3H), 1.68 (d,  $J = 15.4$  Hz, 1H), 1.33 (d,  $J = 15.4$  Hz, 1H), 1.24 (s, 6H), 1.21 (s, 6H);  $^{13}\text{C NMR}$  (100 MHz,  $\text{CDCl}_3$ ):  $\delta$  195.3, 161.8, 154.5, 147.0, 142.8, 128.2, 124.4, 124.0, 122.8, 120.7, 111.3, 110.1, 102.6, 83.0, 51.0, 24.8, 24.7, 23.7; HRMS ( $\text{ESI}^+$ )  $[\text{M}+\text{H}]^+$ : Calcd for  $\text{C}_{22}\text{H}_{26}\text{O}_5\text{B}$ : 381.1863 m/z, found: 381.1868 m/z. Specific rotation:  $[\alpha]_D^{20} -42.8$  ( $c$  1.00,  $\text{CHCl}_3$ ) for an enantiomerically enriched sample of 89:11 e.r.

Enantiomeric purity of **4k** was determined by HPLC analysis in comparison with authentic racemic material (89:11 e.r. shown; Chiralcel OZ-H column, 99:1 hexanes/ *i*PrOH, 0.5 mL/min, 254 nm).

&lt;Chromatogram&gt;

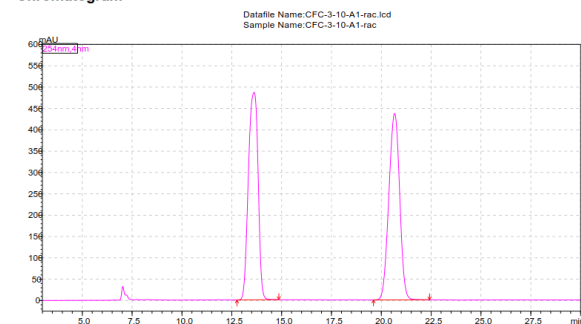

&lt;Peak Table&gt;

| Peak# | Ret. Time | Area     | Height | Area%   | Conc. |
|-------|-----------|----------|--------|---------|-------|
| 1     | 13.616    | 16442470 | 485964 | 50.012  | 0.000 |
| 2     | 20.667    | 16434604 | 436745 | 49.988  | 0.000 |
| Total |           | 32877075 | 922709 | 100.000 |       |

&lt;Chromatogram&gt;

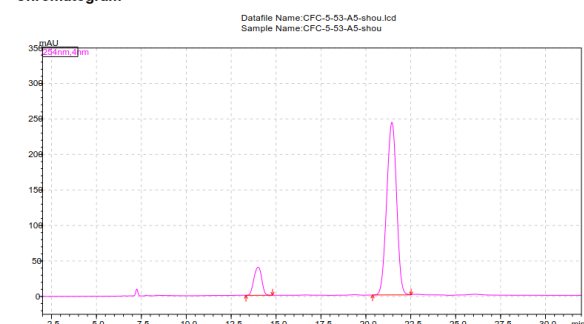

&lt;Peak Table&gt;

| Peak# | Ret. Time | Area     | Height | Area%   | Conc. |
|-------|-----------|----------|--------|---------|-------|
| 1     | 14.002    | 1192111  | 39452  | 11.337  | 0.000 |
| 2     | 21.450    | 9323284  | 243093 | 88.663  | 0.000 |
| Total |           | 10515395 | 282545 | 100.000 |       |

| Peak # | Time (min) | Area (%) | Peak # | Time (min) | Area (%) |
|--------|------------|----------|--------|------------|----------|
| 1      | 13.616     | 50.012   | 1      | 21.282     | 11.337   |
| 2      | 20.667     | 49.988   | 2      | 23.282     | 88.663   |

**(R)-2-(Benzofuran-2-yl)-1-(furan-2-yl)-2-methyl-3-(4,4,5,5-tetramethyl-1,3,2-dioxaborolan-2-yl)propan-1-one (4l).** Yield: (57.8 mg, 76%); IR (neat): 2974 (m), 2932 (m), 2902 (w), 1669 (s), 1582 (m), 1457 (s), 1354 (s), 1316 (s), 1280 (m), 1140 (s), 1082 (m), 1010 (m), 967 (m), 942 (m), 862 (s), 800 (m), 695 (m), 540 (s)  $\text{cm}^{-1}$ ;  $^1\text{H NMR}$  (400 MHz,  $\text{CDCl}_3$ ):  $\delta$  7.55 - 7.50 (m, 1H), 7.41 (dd,  $J = 1.8, 0.8$  Hz, 1H), 7.38 - 7.33 (m, 1H), 7.23 - 7.16 (m, 2H), 6.78 (dd,  $J = 3.6, 0.6$  Hz, 1H), 6.68 (s, 1H), 6.28 (dd,  $J = 3.6, 1.8$  Hz, 1H), 1.89 (s, 3H), 1.77 (d,  $J = 15.4$  Hz, 1H), 1.37 (d,  $J = 15.4$  Hz, 1H), 1.22 (s, 6H), 1.20 (s, 6H);  $^{13}\text{C NMR}$  (100 MHz,  $\text{CDCl}_3$ ):  $\delta$  188.8, 161.9, 154.6, 150.5, 145.9, 128.4, 123.7, 122.62, 120.7, 118.7, 111.7, 111.2, 102.1, 83.0, 49.8, 24.8, 24.7, 23.6;  $^{11}\text{B NMR}$  (128 MHz,  $\text{CDCl}_3$ ): 32.2; HRMS (ESI<sup>+</sup>)  $[\text{M}+\text{H}]^+$ : Calcd for  $\text{C}_{22}\text{H}_{26}\text{O}_5\text{B}$ : 381.1865 m/z, found: 381.1868 m/z. Specific rotation:  $[\alpha]_{\text{D}}^{20} -40.2$  ( $c$  1.00,  $\text{CHCl}_3$ ) for an enantiomerically enriched sample of 90:10 e.r.

Enantiomeric purity of **4l** was determined by HPLC analysis in comparison with authentic racemic material (90:10 e.r. shown; Chiralcel IC column, 98:2 hexanes/ *i*PrOH, 0.5 mL/min, 254 nm).

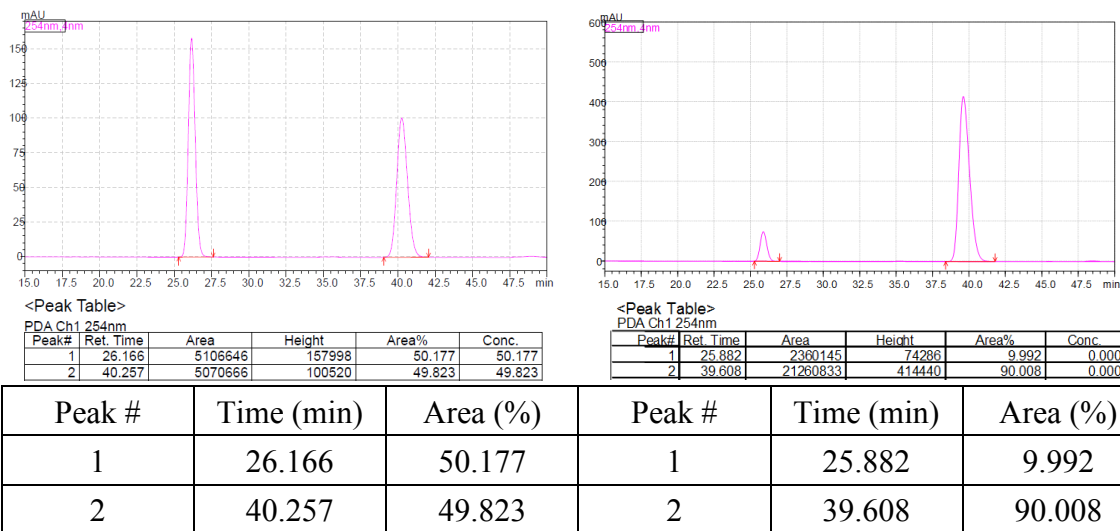

**(R)-2-(Benzofuran-2-yl)-1-(furan-3-yl)-2-methyl-3-(4,4,5,5-tetramethyl-1,3,2-dioxaborolan-2-yl)propan-1-one (4m).** Yield: (40.4 mg, 51%); IR (neat): 2995 (m), 2973 (w), 2933 (w), 2888 (w), 1665 (s), 1579 (m), 1454 (m), 1355 (s), 1314 (s), 1253 (m), 1216 (m), 1139 (s), 1073 (m), 968 (m), 853 (s), 809 (s), 753 (s), 694 (m), 538 (m)  $\text{cm}^{-1}$ ;  $^1\text{H NMR}$  (400 MHz,  $\text{CDCl}_3$ ):  $\delta$  7.66 (dd,  $J = 2.8, 1.2$  Hz, 1H), 7.57 - 7.52 (m, 1H), 7.39 - 7.33 (m, 2H), 7.25 - 7.18 (m, 2H), 7.10 (dd,  $J = 5.0, 2.8$  Hz, 1H), 6.71 (d,  $J = 0.8$  Hz, 1H), 1.87 (s, 3H), 1.71 (d,  $J = 15.4$  Hz, 1H), 1.33 (d,  $J = 15.4$  Hz, 1H), 1.24 (s, 6H), 1.22 (s, 6H);  $^{13}\text{C NMR}$  (100 MHz,  $\text{CDCl}_3$ ):  $\delta$  194.7, 162.3, 154.5, 139.2, 132.2, 128.5, 128.4, 125.0, 123.9, 122.7, 120.7, 111.3, 102.2, 82.9, 50.4, 24.7, 24.8, 23.8; HRMS (ESI<sup>+</sup>)  $[\text{M}+\text{H}]^+$ : Calcd for  $\text{C}_{22}\text{H}_{26}\text{O}_4\text{BS}$ : 396.1674 m/z, found: 396.1676 m/z.

Specific rotation:  $[\alpha]_D^{20} -49.5$  ( $c$  1.00,  $\text{CHCl}_3$ ) for an enantiomerically enriched sample of 98:2 e.r.

Enantiomeric purity of **4m** was determined by HPLC analysis in comparison with authentic racemic material (98:2 e.r. shown; Chiralcel OZ–H column, 99:1 hexanes/ *i*PrOH, 0.5 mL/min, 254 nm).

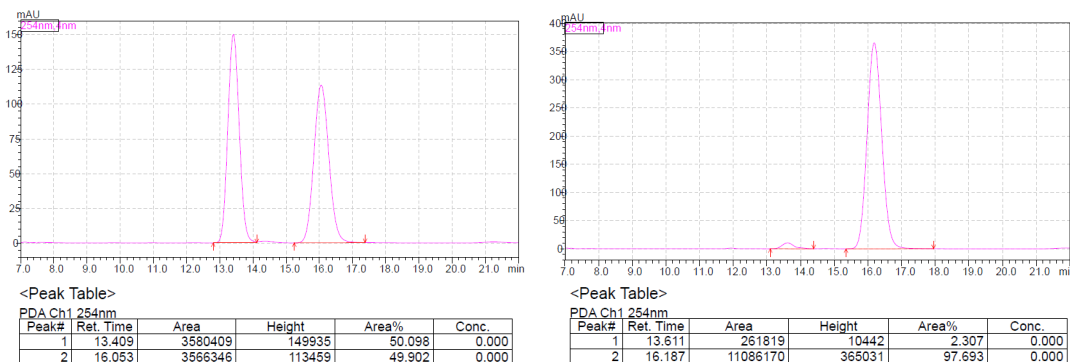

| Peak # | Time (min) | Area (%) | Peak # | Time (min) | Area (%) |
|--------|------------|----------|--------|------------|----------|
| 1      | 13.409     | 50.098   | 1      | 13.611     | 2.307    |
| 2      | 16.053     | 49.902   | 2      | 16.187     | 97.693   |

**2-(Benzofuran-2-yl)-2-methyl-3-(4,4,5,5-tetramethyl-1,3,2-dioxaborolan-2-yl)-1-(thiophen-2-yl)propan-1-one (4n).** Yield: (41.2 mg, 52%); **IR (neat):** 3108 (w), 2972 (m), 2928 (m), 1654 (s), 1579 (m), 1455 (m), 1410 (m), 1388 (s), 1353 (s), 1254 (m), 1214 (m), 1139 (s), 1038 (m), 939 (m), 843 (s), 798 (m), 749 (s), 726 (s), 696 (m), 534 (m)  $\text{cm}^{-1}$ ;  **$^1\text{H}$  NMR (400 MHz,  $\text{CDCl}_3$ ):**  $\delta$  7.54 (dd,  $J = 4.8, 4.0$  Hz, 1H), 7.42 (d,  $J = 5.0$  Hz, 1H), 7.37 - 7.29 (m, 2H), 7.22 - 7.18 (m, 2H), 6.84 (t,  $J = 4.4$  Hz, 1H), 6.73 (s, 1H), 1.90 (s, 3H), 1.74 (d,  $J = 15.4$  Hz, 1H), 1.35 (d,  $J = 15.4$  Hz, 1H), 1.22 (s, 6H), 1.19 (s, 6H);  **$^{13}\text{C}$  NMR (100 MHz,  $\text{CDCl}_3$ ):**  $\delta$  193.2, 161.9, 154.6, 141.5, 133.1, 132.7, 128.4, 127.8, 123.9, 122.7, 120.7, 111.3, 102.6, 83.0, 50.7, 24.8, 24.7, 24.2; **HRMS (ESI $^+$ )  $[\text{M}+\text{H}]^+$ :** Calcd for  $\text{C}_{22}\text{H}_{26}\text{O}_4\text{BS}$ : 396.1671 m/z, found: 396.1676 m/z. Specific rotation:  $[\alpha]_D^{20} -63.4$  ( $c$  1.00,  $\text{CHCl}_3$ ) for an enantiomerically enriched sample of 98.5:1.5 e.r.

Enantiomeric purity of **4n** was determined by HPLC analysis in comparison with authentic racemic material (98.5:1.5 e.r. shown; Chiralcel OZ–H column, 99:1 hexanes/ *i*PrOH, 0.5 mL/min, 254 nm).

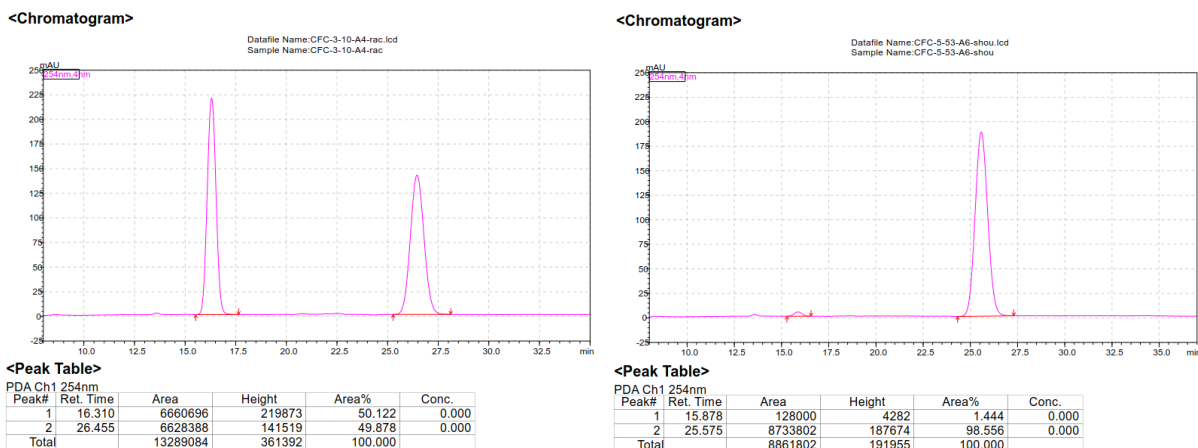

| Peak # | Time (min) | Area (%) | Peak # | Time (min) | Area (%) |
|--------|------------|----------|--------|------------|----------|
| 1      | 16.310     | 50.122   | 1      | 15.878     | 1.444    |
| 2      | 26.455     | 49.878   | 2      | 25.575     | 98.556   |

■ **Representative Experimental Procedure for Phosphine–Cu-Catalyzed Reactions of B<sub>2</sub>(pin)<sub>2</sub>, 1,1-Disubstituted Alkene and 4-chlorophenol ester:** In a N<sub>2</sub>-filled glove-box, an oven-dried vial (4 mL, 17 × 38 mm) with a magnetic stir bar was charged with NHC-Cu complex (10.8 mg, 0.02 mmol, 10 mol %), CuCl (2.0 mg, 0.02 mmol, 10 mol%), LiOt-Bu (24 mg, 0.3 mmol, 1.5 equiv), 4Å molecular sieve (200 mg) and tetrahydrofuran (thf, 1 mL). The vessel was sealed with a cap (phenolic open top cap with red PTFE/white silicone septum) and the solution was allowed to stir at 22 °C for one hour. Bis(pinacolato)diboron (76.2 mg, 0.30 mmol, 1.5 equiv) was added to the solution, causing it to turn dark brown immediately. The vial was re-sealed with a cap (phenolic open top cap with red PTFE/white silicone septum). The mixture was allowed to stir at 22 °C for 30 min under an atmosphere of N<sub>2</sub>. Alkene (34.8 mg, 0.20 mmol, 1 equiv) and 4-chlorophenol ester (46.2 mg, 0.20 mmol, 2.0 equiv) were added. The resulting solution was allowed to stir at 22 °C for 16 h before the reaction was quenched by passing the mixture through a short plug of celite and silica gel and eluted with Et<sub>2</sub>O (3 × 2 mL). The filtrate was concentrated *in vacuo* to provide colorless oil. The crude was purified by silica gel chromatography (petroleum ether : ethyl acetate = 60:1) to afford **9a** as white solid (60.9 mg, 0.15 mmol, 75% yield).

■ **Characterization of product of 9a-9k.**

**(R)-2-(Benzo[b]thiophen-2-yl)-2-methyl-1-phenyl-3-(4,4,5,5-tetramethyl-1,3,2-dioxaborolan-2-yl)propan-1-one (9a).** Yield: (60.9 mg, 75%); IR (neat): 2971 (m), 2926 (m), 2884 (w), 1671 (s), 1593 (w), 1454 (m), 1388 (m), 1355 (s), 1317 (s), 1246 (m), 1184 (w), 1138 (s), 1004 (m), 969 (s), 847 (m), 796 (m), 611 (m), 539 (m) cm<sup>-1</sup>; <sup>1</sup>H NMR (400 MHz, CDCl<sub>3</sub>): δ 7.80 (d, *J* = 7.8 Hz, 1H), 7.71 - 7.66 (m, 1H), 7.61 (dd, *J* = 8.4, 1.2 Hz, 2H), 7.40 - 7.28 (m, 3H), 7.25 (dd, *J* = 10.8, 4.8 Hz, 2H), 7.17 (s, 1H), 1.92 (s, 3H), 1.85 (d, *J* = 15.4 Hz, 1H), 1.52 (d, *J* = 15.4 Hz, 1H), 1.21 (s, 6H), 1.20 (s, 6H); <sup>13</sup>C NMR (100 MHz, CDCl<sub>3</sub>): δ 202.4, 152.2, 139.9,

139.1, 136.5, 131.5, 129.2, 127.8, 124.2, 124.0, 123.3, 122.2, 120.4, 83.0, 52.0, 27.1, 24.7, 24.6; **HRMS (EI<sup>+</sup>) [M]<sup>+</sup>**: Calcd for C<sub>24</sub>H<sub>27</sub>O<sub>3</sub>SB: 405.1815 m/z, found: 405.1810 m/z. Specific rotation:  $[\alpha]_D^{20}$  -30.3 (*c* 1.00, CHCl<sub>3</sub>) for an enantiomerically enriched sample of 86:14 e.r.

Enantiomeric purity of **9a** was determined by HPLC analysis in comparison with authentic racemic material (86:14 e.r. shown; Chiralcel OZ-H column, 99:1 hexanes/ *i*PrOH, 0.5 mL/min, 254 nm).

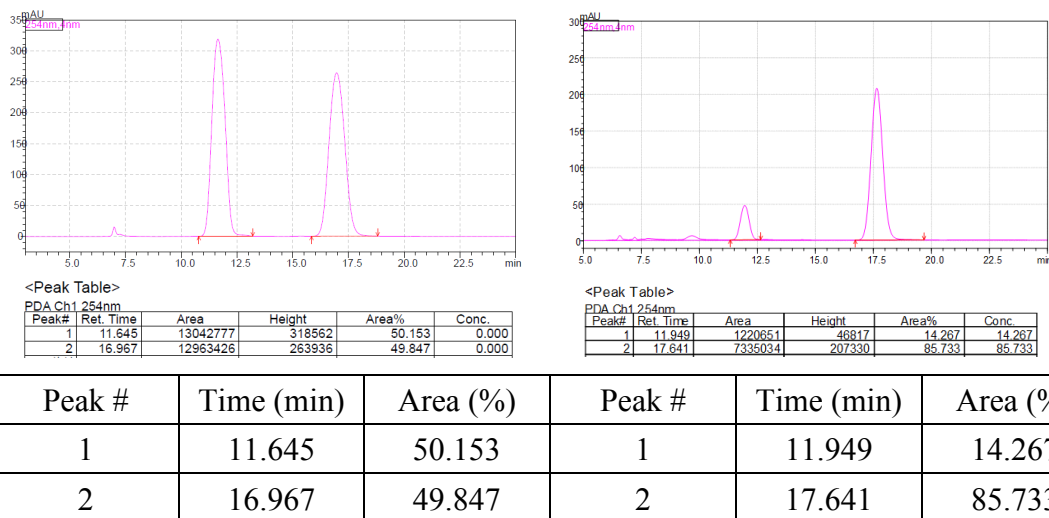

**(R)-2-Methyl-1-phenyl-2-(5-phenylthiophen-2-yl)-3-(4,4,5,5-tetramethyl-1,3,2-dioxaborolan-2-yl)propan-1-one (9b)**. Yield: (53.6 mg, 62%); **IR (neat)**: 2972 (m), 2931 (w), 1668 (s), 1595 (m), 1495 (m), 1445 (m), 1387 (m), 1356 (s), 1317 (s), 1253 (m), 1139 (s), 1074 (m), 1036 (m), 969 (s), 871 (m), 847 (m), 798 (m), 757 (s), 720 (s), 686 (s), 644 (m) cm<sup>-1</sup>; **<sup>1</sup>H NMR (400 MHz, CDCl<sub>3</sub>)**:  $\delta$  7.58 (t, *J* = 7.0 Hz, 3H), 7.42 - 7.32 (m, 3H), 7.30 - 7.22 (m, 3H), 7.19 (d, *J* = 3.8 Hz, 1H), 6.88 (d, *J* = 3.8 Hz, 1H), 1.86 (s, 3H), 1.78 (d, *J* = 15.6 Hz, 1H), 1.50 (d, *J* = 15.6 Hz, 1H), 1.21 (s, 12H); **<sup>13</sup>C NMR (100 MHz, CDCl<sub>3</sub>)**:  $\delta$  202.9, 150.69, 142.9, 136.9, 134.3, 131.3, 129.1, 128.8, 127.8, 127.3, 125.4, 125.1, 123.1, 83.0, 51.7, 27.2, 24.7, 24.7; **HRMS (ESI<sup>+</sup>) [M+H]<sup>+</sup>**: Calcd for C<sub>26</sub>H<sub>30</sub>O<sub>3</sub>BS: 432.2040 m/z, found: 432.2036 m/z; Specific rotation:  $[\alpha]_D^{20}$  -49.4 (*c* 1.00, CHCl<sub>3</sub>) for an enantiomerically enriched sample of 89:11 e.r.

Enantiomeric purity of **9b** was determined by HPLC analysis in comparison with authentic racemic material (89:11 e.r. shown; Chiralcel IC column, 99:1 hexanes/ *i*PrOH, 0.5 mL/min, 254 nm).

&lt;Chromatogram&gt;

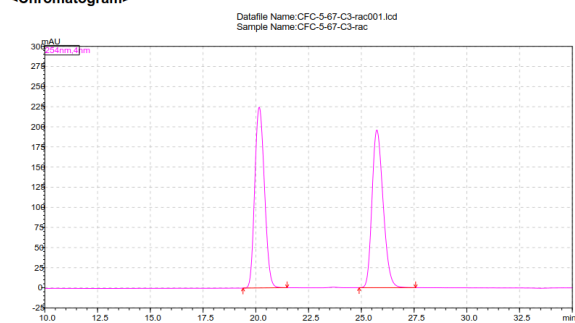

&lt;Peak Table&gt;

| PDA Ch1 | 254nm  | Area     | Height | Area%   | Conc. |
|---------|--------|----------|--------|---------|-------|
| 1       | 20.161 | 7206745  | 224604 | 50.047  | 0.000 |
| 2       | 25.735 | 7193245  | 195959 | 49.953  | 0.000 |
| Total   |        | 14399990 | 420562 | 100.000 |       |

&lt;Chromatogram&gt;

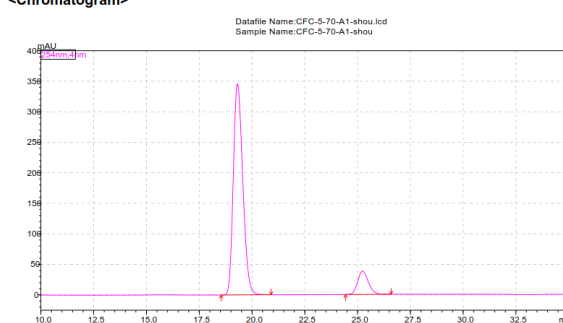

&lt;Peak Table&gt;

| PDA Ch1 | 254nm  | Area     | Height | Area%   | Conc. |
|---------|--------|----------|--------|---------|-------|
| 1       | 19.311 | 10799698 | 345754 | 88.922  | 0.000 |
| 2       | 25.235 | 1345473  | 38305  | 11.078  | 0.000 |
| Total   |        | 12145171 | 384059 | 100.000 |       |

| Peak # | Time (min) | Area (%) | Peak # | Time (min) | Area (%) |
|--------|------------|----------|--------|------------|----------|
| 1      | 20.161     | 50.047   | 1      | 19.311     | 88.922   |
| 2      | 25.735     | 49.953   | 2      | 25.235     | 11.078   |

**(R)-2-Methyl-1-phenyl-2-(5-phenylfuran-2-yl)-3-(4,4,5,5-tetramethyl-1,3,2-dioxaborolan-2-yl)propan-1-one (9c).** Yield: (55.7 mg, 67%); IR (neat): 2975 (m), 2922 (m), 1675 (s), 1593 (m), 1475 (m), 1446 (m), 1388 (m), 1353 (s), 1311 (s), 1257 (m), 1184 (m), 1141 (s), 1062 (m), 1046 (m), 970 (s), 874 (m), 848 (m), 790 (m), 755 (s), 715 (m), 688 (s), 652 (m)  $\text{cm}^{-1}$ ;  $^1\text{H NMR}$  (400 MHz,  $\text{CDCl}_3$ ):  $\delta$  7.57 (d,  $J = 7.8$  Hz, 2H), 7.50 (d,  $J = 7.7$  Hz, 2H), 7.39 - 7.27 (m, 3H), 7.21 (dt,  $J = 19.9, 7.2$  Hz, 3H), 6.67 - 6.56 (m, 3H), 6.34 - 6.30 (m, 1H), 1.80 (s, 2H), 1.72 (d,  $J = 15.4$  Hz, 1H), 1.35 - 1.11 (m, 13H);  $^{13}\text{C NMR}$  (100 MHz,  $\text{CDCl}_3$ ):  $\delta$  202.2, 158.2, 152.8, 136.9, 131.4, 130.6, 128.6, 128.5, 127.9, 127.1, 123.5, 107.3, 106.0, 82.9, 50.6, 24.8, 24.7, 23.9;  $^{11}\text{B NMR}$  (128 MHz,  $\text{CDCl}_3$ ): 32.6; HRMS (ESI $^+$ )  $[\text{M}+\text{H}]^+$ : Calcd for  $\text{C}_{26}\text{H}_{30}\text{O}_4\text{B}$ : 416.2268 m/z, found: 416.2262 m/z; Specific rotation:  $[\alpha]_{\text{D}}^{20} -30.3$  ( $c$  1.00,  $\text{CHCl}_3$ ) for an enantiomerically enriched sample of 98:2 e.r.

Enantiomeric purity of **9c** was determined by HPLC analysis in comparison with authentic racemic material (98:2 e.r. shown; Chiralcel IC column, 99:1 hexanes/ *i*PrOH, 0.5 mL/min, 254 nm).

&lt;Chromatogram&gt;

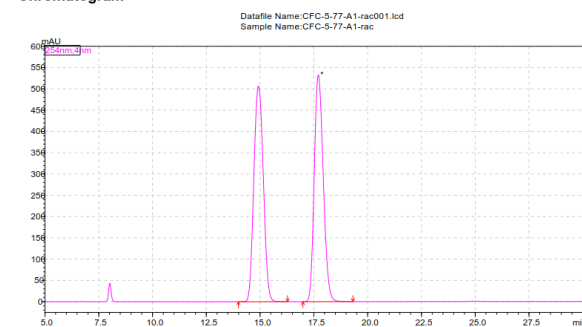

&lt;Peak Table&gt;

| PDA Ch1 | 254nm | Ret. Time | Area     | Height  | Area%   | Conc. |
|---------|-------|-----------|----------|---------|---------|-------|
| 1       |       | 14.925    | 15531113 | 506721  | 50.072  | 0.000 |
| 2       |       | 17.708    | 15486338 | 532740  | 49.928  | 0.000 |
| Total   |       |           | 31017451 | 1039461 | 100.000 |       |

&lt;Chromatogram&gt;

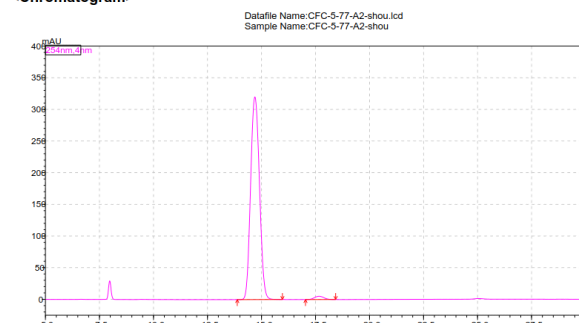

&lt;Peak Table&gt;

| PDA Ch1 | 254nm | Ret. Time | Area    | Height | Area%   | Conc. |
|---------|-------|-----------|---------|--------|---------|-------|
| 1       |       | 14.693    | 9102443 | 320125 | 98.275  | 0.000 |
| 2       |       | 17.660    | 159791  | 5250   | 1.725   | 0.000 |
| Total   |       |           | 9262234 | 325376 | 100.000 |       |

| Peak # | Time (min) | Area (%) | Peak # | Time (min) | Area (%) |
|--------|------------|----------|--------|------------|----------|
| 1      | 14.925     | 50.072   | 1      | 14.693     | 98.275   |
| 2      | 17.708     | 49.928   | 2      | 17.660     | 1.725    |

**(R)-2-(5-(3,4-Dimethoxyphenyl)furan-2-yl)-2-methyl-1-phenyl-3-(4,4,5,5-tetramethyl-1,3,2-dioxaborolan-2-yl)propan-1-one (9d).** Yield: (62.8 mg, 66%); IR (neat): 2972 (m), 2929 (m), 2854 (w), 1677 (s), 1597 (m), 1503 (m), 1462 (m), 1357 (s), 1318 (m), 1251 (m), 1142 (s), 1094 (m), 1024 (s), 970 (m), 876 (m), 792 (m), 763 (s), 719 (m)  $\text{cm}^{-1}$ ;  $^1\text{H NMR}$  (400 MHz,  $\text{CDCl}_3$ ):  $\delta$  7.52 - 7.45 (m, 2H), 7.36 (t,  $J = 7.4$  Hz, 1H), 7.24 (t,  $J = 7.6$  Hz, 2H), 7.13 (dd,  $J = 8.4, 1.8$  Hz, 1H), 7.02 (d,  $J = 1.8$  Hz, 1H), 6.81 (d,  $J = 8.4$  Hz, 1H), 6.50 (d,  $J = 3.3$  Hz, 1H), 6.31 (d,  $J = 3.3$  Hz, 1H), 3.87 (s, 3H), 3.86 (s, 3H), 1.79 (s, 3H), 1.72 (d,  $J = 15.4$  Hz, 1H), 1.32 - 1.15 (m, 13H).;  $^{13}\text{C NMR}$  (100 MHz,  $\text{CDCl}_3$ ):  $\delta$  202.4, 157.7, 152.9, 149.0, 148.4, 137.0, 131.4, 128.6, 127.9, 124.0, 116.3, 111.2, 107.3, 106.9, 104.7, 82.9, 55.9, 50.6, 24.8, 24.7, 23.9; HRMS ( $\text{ESI}^+$ ) [ $\text{M}+\text{H}$ ] $^+$ : Calcd for  $\text{C}_{28}\text{H}_{34}\text{O}_6\text{B}$ : 476.2479 m/z, found: 476.2474 m/z; Specific rotation:  $[\alpha]_{\text{D}}^{20} - 12.2$  ( $c$  1.00,  $\text{CHCl}_3$ ) for an enantiomerically enriched sample of 93:7 e.r.

Enantiomeric purity of **9d** was determined by HPLC analysis in comparison with authentic racemic material (93:7 e.r. shown; Chiralcel IC column, 98:2 hexanes/ *i*PrOH, 0.8 mL/min, 254 nm).



&lt;Chromatogram&gt;

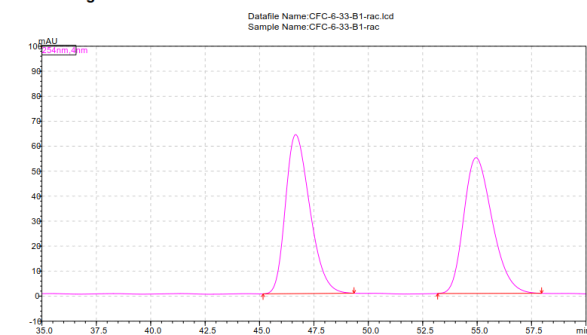

&lt;Peak Table&gt;

| PDA Ch1 | 254nm | Ret. Time | Area    | Height | Area%   | Conc. |
|---------|-------|-----------|---------|--------|---------|-------|
| 1       |       | 46.662    | 4965244 | 63655  | 50.046  | 0.000 |
| 2       |       | 54.953    | 4956043 | 54332  | 49.954  | 0.000 |
| Total   |       |           | 9921288 | 117987 | 100.000 |       |

&lt;Chromatogram&gt;

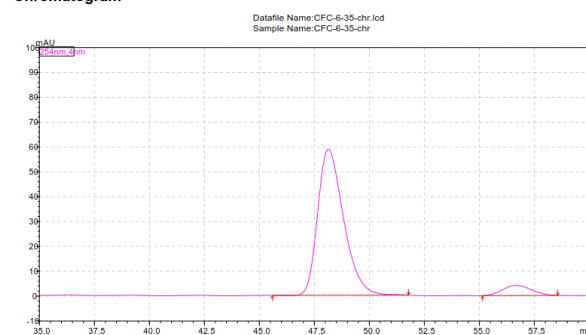

&lt;Peak Table&gt;

| PDA Ch1 | 254nm | Ret. Time | Area    | Height | Area%   | Conc. |
|---------|-------|-----------|---------|--------|---------|-------|
| 1       |       | 48.138    | 4799369 | 58784  | 92.789  | 0.000 |
| 2       |       | 56.689    | 372952  | 4123   | 7.211   | 0.000 |
| Total   |       |           | 5172321 | 62907  | 100.000 |       |

| Peak # | Time (min) | Area (%) | Peak # | Time (min) | Area (%) |
|--------|------------|----------|--------|------------|----------|
| 1      | 46.662     | 50.046   | 1      | 48.138     | 92.789   |
| 2      | 54.953     | 49.954   | 2      | 56.689     | 7.211    |

**(R)-2-Methyl-1-phenyl-3-(4,4,5,5-tetramethyl-1,3,2-dioxaborolan-2-yl)-2-(5-(4-(trifluoromethyl)phenyl)furan-2-yl)propan-1-one (9e).** Yield: (70.7 mg, 73%); IR (neat): 2990 (m), 2921 (w), 1678 (s), 1595 (m), 1497 (w), 1446 (w), 1383 (m), 1353 (m), 1319 (s), 1256 (m), 1215 (m), 1182 (m), 1124 (s), 1108 (s), 1071 (m), 970 (m), 872 (m), 858 (s), 788 (s), 714 (m), 693 (m), 652 (m)  $\text{cm}^{-1}$ ;  $^1\text{H NMR}$  (400 MHz,  $\text{CDCl}_3$ ):  $\delta$  7.64 (d,  $J = 8.2$  Hz, 2H), 7.58 - 7.47 (m, 4H), 7.43 - 7.30 (m, 1H), 7.25 (dd,  $J = 11.2, 3.8$  Hz, 2H), 6.75 (d,  $J = 3.2$  Hz, 1H), 6.42 - 6.35 (m, 1H), 1.82 (s, 3H), 1.72 (d,  $J = 15.4$  Hz, 1H), 1.32 (d,  $J = 15.4$  Hz, 1H), 1.25 (s, 6H), 1.24 (s, 6H);  $^{13}\text{C NMR}$  (100 MHz,  $\text{CDCl}_3$ ):  $\delta$  201.9, 159.6, 151.4, 136.8, 133.7, 131.6, 128.7 (q,  $J = 32.6$  Hz), 128.6, 128.0, 125.6 (q,  $J = 3.8$  Hz), 124.1 (q,  $J = 271.8$  Hz), 123.5, 108.1, 107.7, 83.0, 50.7, 24.8, 24.7, 24.0;  $^{19}\text{F NMR}$  (376 MHz,  $\text{CDCl}_3$ ):  $\delta$  -62.5; HRMS (ESI $^+$ )  $[\text{M}+\text{H}]^+$ : Calcd for  $\text{C}_{27}\text{H}_{29}\text{BF}_3\text{O}_4$ : 484.2142 m/z, found: 484.2139 m/z; Specific rotation:  $[\alpha]_{\text{D}}^{20} -14.7$  (c 1.00,  $\text{CHCl}_3$ ) for an enantiomerically enriched sample of 87:13 e.r.

Enantiomeric purity of **9e** was determined by HPLC analysis in comparison with authentic racemic material (87:13 e.r. shown; Chiralcel IC column, 99:1 hexanes/ *i*PrOH, 0.5 mL/min, 254 nm).

&lt;Chromatogram&gt;

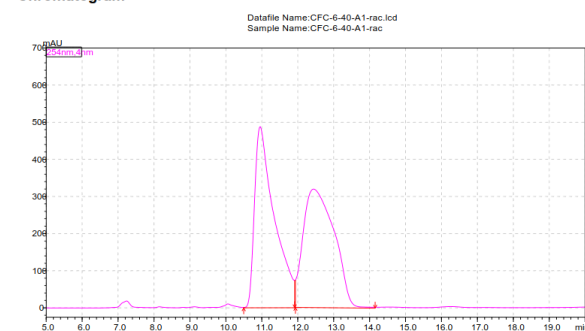

&lt;Peak Table&gt;

| Peak# | Ret. Time | Area     | Height | Area%   | Conc. |
|-------|-----------|----------|--------|---------|-------|
| 1     | 10.953    | 18739463 | 487610 | 49.375  | 0.000 |
| 2     | 12.441    | 19213636 | 319151 | 50.625  | 0.000 |
| Total |           | 37953099 | 806761 | 100.000 |       |

&lt;Chromatogram&gt;

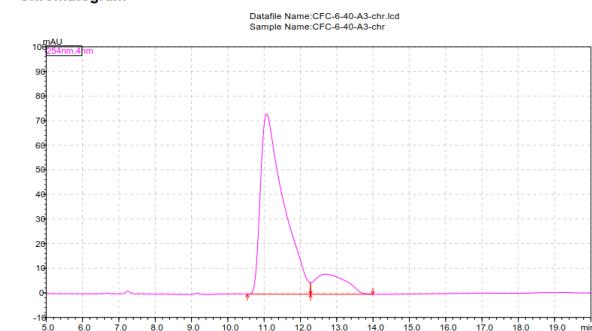

&lt;Peak Table&gt;

| Peak# | Ret. Time | Area    | Height | Area%   | Conc. |
|-------|-----------|---------|--------|---------|-------|
| 1     | 11.068    | 3249295 | 73288  | 87.009  | 0.000 |
| 2     | 12.695    | 485123  | 8155   | 12.991  | 0.000 |
| Total |           | 3734418 | 81443  | 100.000 |       |

| Peak # | Time (min) | Area (%) | Peak # | Time (min) | Area (%) |
|--------|------------|----------|--------|------------|----------|
| 1      | 10.953     | 49.375   | 1      | 11.068     | 87.009   |
| 2      | 12.441     | 50.625   | 2      | 12.695     | 12.991   |

**(R)-2-Methyl-2-(naphthalen-2-yl)-1-phenyl-3-(4,4,5,5-tetramethyl-1,3,2-dioxaborolan-2-yl)propan-1-one (9f).** Yield: (57.6 mg, 72%); IR (neat): 2970 (m), 2925 (w), 1668 (s), 1632 (m), 1451 (m), 1353 (s), 1314 (s), 1266 (m), 1216 (m), 1140 (s), 1041 (m), 972 (s), 849 (m), 819 (s), 748 (s), 709 (m), 685 (m), 539 (m)  $\text{cm}^{-1}$ ;  $^1\text{H NMR}$  (400 MHz,  $\text{CDCl}_3$ ):  $\delta$  7.93 (s, 1H), 7.86 - 7.79 (m, 3H), 7.54 - 7.41 (m, 5H), 7.32 (t,  $J = 7.4$  Hz, 1H), 7.17 (t,  $J = 7.8$  Hz, 2H), 1.92 (s, 3H), 1.71 (d,  $J = 15.4$  Hz, 1H), 1.44 (d,  $J = 15.4$  Hz, 1H), 1.23 (s, 6H), 1.20 (s, 6H);  $^{13}\text{C NMR}$  (100 MHz,  $\text{CDCl}_3$ ):  $\delta$  204.0, 143.8, 136.5, 133.5, 132.1, 131.4, 129.6, 128.5, 128.0, 127.8, 127.5, 126.1, 125.7, 124.9, 123.8, 82.8, 53.8, 25.5, 24.8, 24.7;  $^{11}\text{B NMR}$  (128 MHz,  $\text{CDCl}_3$ ): 33.0; HRMS ( $\text{EI}^+$ ) [ $\text{M}]^+$ : Calcd for:  $\text{C}_{26}\text{H}_{29}\text{O}_3\text{B}$ : 399.2252 m/z, found: 399.2246 m/z; Specific rotation:  $[\alpha]_{\text{D}}^{20} -122.2$  ( $c$  1.00,  $\text{CHCl}_3$ ) for an enantiomerically enriched sample of 97:3 e.r.

Enantiomeric purity of **9f** was determined by HPLC analysis in comparison with authentic racemic material (97:3 e.r. shown; Chiralcel OZ-H column, 99:1 hexanes/ *i*PrOH, 0.5 mL/min, 254 nm).

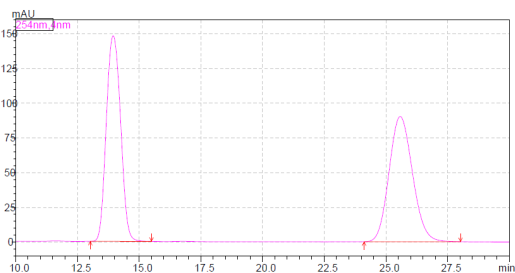

&lt;Peak Table&gt;

| Peak# | Ret. Time | Area    | Height | Area%  | Conc. |
|-------|-----------|---------|--------|--------|-------|
| 1     | 13.950    | 5946747 | 148004 | 49.967 | 0.000 |
| 2     | 25.379    | 5954568 | 90183  | 50.033 | 0.000 |

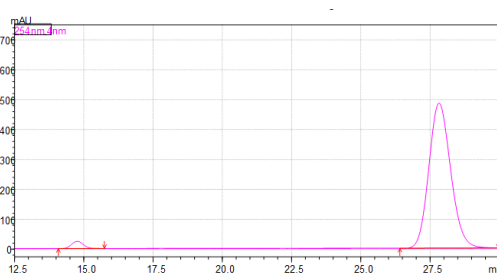

&lt;Peak Table&gt;

| Peak# | Ret. Time | Area      | Height | Area%  | Conc.  |
|-------|-----------|-----------|--------|--------|--------|
| 1     | 14.767    | 728002    | 24261  | 2.668  | 2.668  |
| 2     | 27.823    | 265558.43 | 485038 | 97.332 | 97.332 |

| Peak # | Time (min) | Area (%) | Peak # | Time (min) | Area (%) |
|--------|------------|----------|--------|------------|----------|
| 1      | 13.950     | 49.967   | 1      | 14.767     | 2.668    |

|   |        |        |   |        |        |
|---|--------|--------|---|--------|--------|
| 2 | 25.579 | 50.033 | 2 | 27.823 | 97.332 |
|---|--------|--------|---|--------|--------|

**(R)-2-Methyl-1-phenyl-2-(6-phenylnaphthalen-2-yl)-3-(4,4,5,5-tetramethyl-1,3,2-dioxaborolan-2-yl)propan-1-one (9g).** Yield: (80.9 mg, 85%); IR (neat): 2971 (m), 2928 (w), 1668 (s), 1595 (m), 1494 (m), 1445 (m), 1383 (m), 1353 (s), 1310 (s), 1261 (m), 1211 (m), 1164 (m), 1139 (s), 1039 (w), 968 (m), 871 (m), 846 (m), 755 (s), 712 (m), 689 (s), 643 (m)  $\text{cm}^{-1}$ ;  $^1\text{H}$  NMR (400 MHz,  $\text{CDCl}_3$ ):  $\delta$  8.04 (s, 1H), 7.96 - 7.91 (m, 2H), 7.87 (d,  $J$  = 8.8 Hz, 1H), 7.81 - 7.76 (m, 1H), 7.74 (dd,  $J$  = 8.1, 0.9 Hz, 2H), 7.57 - 7.47 (m, 4H), 7.43 - 7.29 (m, 2H), 7.23 - 7.13 (m, 2H), 6.88 - 6.78 (m, 1H), 1.95 (s, 3H), 1.74 (d,  $J$  = 15.4 Hz, 1H), 1.48 (d,  $J$  = 15.4 Hz, 1H), 1.25 (s, 6H), 1.23 (s, 6H);  $^{13}\text{C}$  NMR (100 MHz,  $\text{CDCl}_3$ ):  $\delta$  204.3, 154.8, 143.9, 140.9, 138.5, 136.5, 132.7, 132.4, 131.6, 129.6, 129.3, 128.8, 128.5, 127.8, 127.3, 125.9, 125.3, 123.6, 116.7, 83.0, 53.9, 25.6, 24.8, 24.7; HRMS (ESI<sup>+</sup>)  $[\text{M}+\text{H}]^+$ : Calcd for  $\text{C}_{32}\text{H}_{34}\text{BO}_3$ : 476.2632 m/z, found: 476.2629 m/z; Specific rotation:  $[\alpha]_{\text{D}}^{20}$  -89.4 ( $c$  1.00,  $\text{CHCl}_3$ ) for an enantiomerically enriched sample of 91:9 e.r.

Enantiomeric purity of **9g** was determined by HPLC analysis in comparison with authentic racemic material (91:9 e.r. shown; Chiralcel OZ-H column, 99:1 hexanes/ *i*PrOH, 0.5 mL/min, 254 nm).

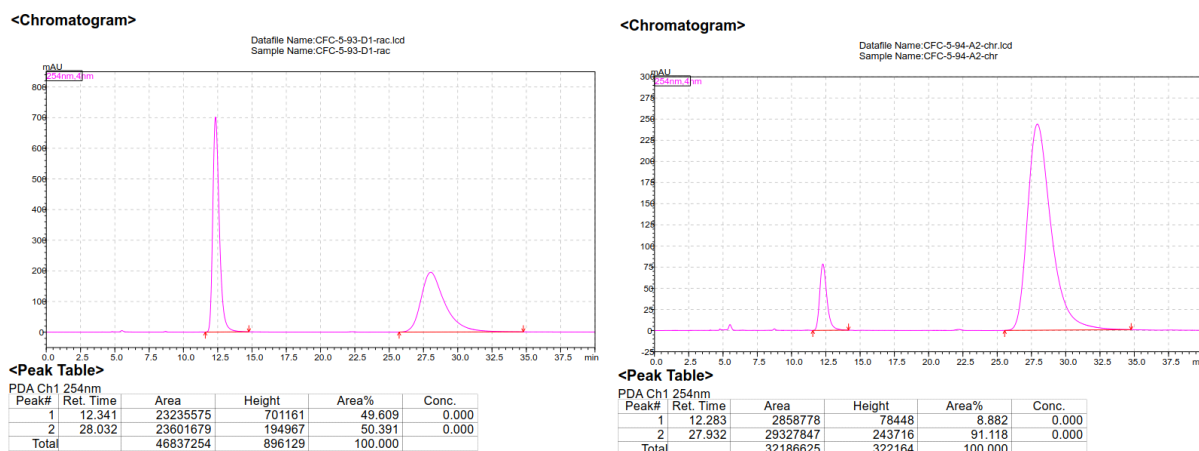

| Peak # | Time (min) | Area (%) | Peak # | Time (min) | Area (%) |
|--------|------------|----------|--------|------------|----------|
| 1      | 12.341     | 49.609   | 1      | 12.283     | 8.882    |
| 2      | 28.032     | 50.391   | 2      | 27.932     | 91.118   |

**(R)-2-(6-Methoxynaphthalen-2-yl)-2-methyl-1-phenyl-3-(4,4,5,5-tetramethyl-1,3,2-dioxaborolan-2-yl)propan-1-one (9h).** IR (neat): 2976 (m), 2926 (w), 1667 (m), 1602 (m), 1481 (m), 1386 (m), 1311 (s), 1278 (s), 1235 (s), 1168 (m), 1124 (s), 1031 (m), 973 (m), 911 (m), 848 (s), 811 (m), 760 (s), 687 (m), 578 (m), 541 (m)  $\text{cm}^{-1}$ ;  $^1\text{H}$  NMR (400 MHz,  $\text{CDCl}_3$ ):  $\delta$  7.82 (d,  $J$  = 1.8 Hz, 1H), 7.70 (dd,  $J$  = 14.6, 8.8 Hz, 2H), 7.48 - 7.44 (m, 2H), 7.38 (dd,  $J$  = 8.6, 2.0 Hz, 1H), 7.33 - 7.28 (m, 1H), 7.18 - 7.14 (m, 3H), 7.11 (d,  $J$  = 2.4 Hz, 1H), 3.91 (s, 3H), 1.87 (s, 3H), 1.66 (d,  $J$  = 15.4 Hz, 1H), 1.41 (d,  $J$  = 15.4 Hz, 1H), 1.20 (s, 6H), 1.18 (s, 6H);  $^{13}\text{C}$  NMR (100 MHz,  $\text{CDCl}_3$ ):  $\delta$  204.3, 157.6, 141.4, 136.7, 133.3, 131.4, 129.7, 129.5, 129.0, 127.8, 127.4,

125.5, 123.8, 119.0, 105.5, 82.9, 55.3, 53.7, 25.6, 24.8, 24.7; **HRMS (ESI<sup>+</sup>) [M+H]<sup>+</sup>**: Calcd for C<sub>27</sub>H<sub>32</sub>O<sub>4</sub>B: 431.2383 m/z, found: 431.2388 m/z. Specific rotation:  $[\alpha]_D^{20}$  -97.7 (*c* 1.00, CHCl<sub>3</sub>) for an enantiomerically enriched sample of 98:2 e.r.

Enantiomeric purity of **9h** was determined by HPLC analysis in comparison with authentic racemic material (98:2 e.r. shown; Chiralcel OZ-H column, 99:1 hexanes/ *i*PrOH, 0.5 mL/min, 220 nm).

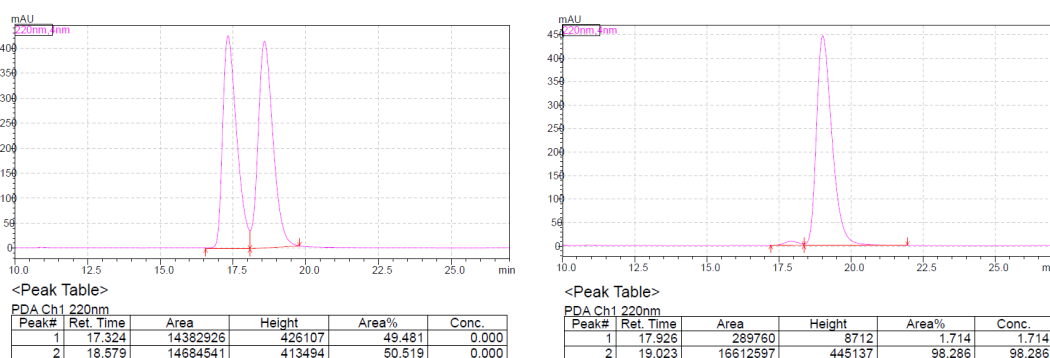

| Peak # | Time (min) | Area (%) | Peak # | Time (min) | Area (%) |
|--------|------------|----------|--------|------------|----------|
| 1      | 17.324     | 49.481   | 1      | 17.926     | 1.714    |
| 2      | 18.579     | 50.519   | 2      | 19.023     | 98.286   |

**(R)-2-(6-(Dibenzylamino)naphthalen-2-yl)-2-methyl-1-phenyl-3-(4,4,5,5-tetramethyl-1,3,2-dioxaborolan-2-yl)propan-1-one (9i)**. Yield: (84.5 mg, 71%); **IR (neat)**: 3356 (m), 3060 (w), 2974 (m), 2918 (m), 1667 (m), 1629 (s), 1599 (s), 1498 (m), 1450 (m), 1352 (s), 1317 (s), 1208 (m), 1141 (s), 1027 (m), 966 (s), 845 (s), 728 (s), 693 (s), 533 (m) cm<sup>-1</sup>; **<sup>1</sup>H NMR (400 MHz, CDCl<sub>3</sub>)**: δ 7.74 (s, 1H), 7.66 (d, *J* = 9.0 Hz, 1H), 7.51 (d, *J* = 8.4 Hz, 3H), 7.40 - 7.24 (m, 12H), 7.17 (t, *J* = 7.8 Hz, 3H), 6.97 (d, *J* = 1.8 Hz, 1H), 4.76 (s, 4H), 1.85 (s, 3H), 1.68 (d, *J* = 15.4 Hz, 1H), 1.37 (d, *J* = 15.4 Hz, 1H), 1.23 (s, 6H), 1.21 (s, 6H); **<sup>13</sup>C NMR (100 MHz, CDCl<sub>3</sub>)**: δ 204.5, 147.1, 139.8, 138.4, 136.9, 133.7, 131.3, 129.7, 129.2, 128.7, 127.8, 127.0, 126.9, 126.8, 126.7, 125.3, 123.5, 116.1, 105.9, 82.8, 54.3, 53.6, 25.7, 24.8, 24.7; **HRMS (ESI<sup>+</sup>) [M+H]<sup>+</sup>**: Calcd for C<sub>40</sub>H<sub>43</sub>NO<sub>3</sub>: 595.3367 m/z, found: 595.3363 m/z. Specific rotation:  $[\alpha]_D^{20}$  -33.1 (*c* 1.00, CHCl<sub>3</sub>) for an enantiomerically enriched sample of 94:6 e.r.

Enantiomeric purity of **9i** was determined by HPLC analysis in comparison with authentic racemic material (94:6 e.r. shown; Chiralcel OZ-H column, 99:1 hexanes/ *i*PrOH, 0.5 mL/min, 254 nm).

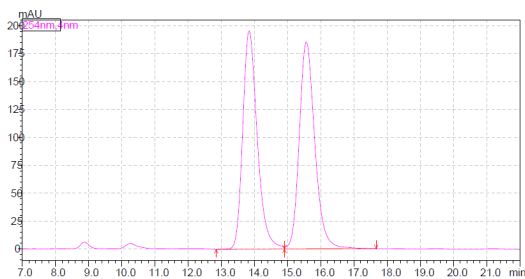

&lt;Peak Table&gt;

| Peak# | Ret. Time | Area    | Height | Area%  | Conc. |
|-------|-----------|---------|--------|--------|-------|
| 1     | 13.836    | 5961784 | 195548 | 49.665 | 0.000 |
| 2     | 15.560    | 6042280 | 185440 | 50.335 | 0.000 |

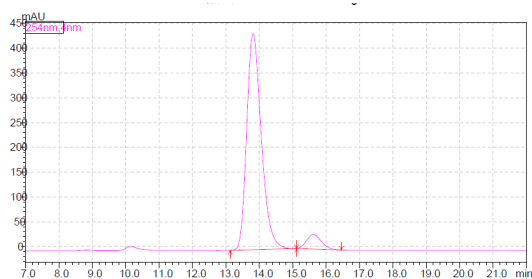

&lt;Peak Table&gt;

| Peak# | Ret. Time | Area     | Height | Area%  | Conc. |
|-------|-----------|----------|--------|--------|-------|
| 1     | 13.813    | 13229993 | 435977 | 93.623 | 0.000 |
| 2     | 15.615    | 901136   | 29320  | 6.377  | 0.000 |

| Peak # | Time (min) | Area (%) | Peak # | Time (min) | Area (%) |
|--------|------------|----------|--------|------------|----------|
| 1      | 13.836     | 49.665   | 1      | 13.813     | 93.623   |
| 2      | 15.560     | 50.335   | 2      | 15.615     | 6.377    |

**(R)-2-(6-(1H-pyrrol-1-yl)naphthalen-2-yl)-2-methyl-1-phenyl-3-(4,4,5,5-tetramethyl-1,3,2-dioxaborolan-2-yl)propan-1-one (9j).** Yield: (69.7 mg, 75%); IR (neat): 2977 (m), 2926 (m), 1666 (s), 1602 (m), 1494 (s), 1468 (m), 1379 (s), 1352 (s), 1312 (m), 1262 (m), 1139 (s), 1077 (m), 1036 (m), 972 (m), 870 (m), 848 (m), 792 (m), 760 (m), 720 (s), 686 (m), 642 (m)  $\text{cm}^{-1}$ ;  $^1\text{H}$  NMR (400 MHz,  $\text{CDCl}_3$ ):  $\delta$  7.91 - 7.82 (m, 2H), 7.75 (dd,  $J = 13.8, 5.2$  Hz, 2H), 7.57 (dd,  $J = 8.8, 2.1$  Hz, 1H), 7.49 - 7.39 (m, 3H), 7.30 (t,  $J = 7.4$  Hz, 1H), 7.17 (dt,  $J = 15.6, 4.8$  Hz, 4H), 6.38 (t,  $J = 2.0$  Hz, 1H), 1.88 (s, 3H), 1.68 (d,  $J = 10.5$  Hz, 1H), 1.42 (d,  $J = 15.4$  Hz, 1H), 1.19 (s, 6H), 1.17 (s, 6H);  $^{13}\text{C}$  NMR (100 MHz,  $\text{CDCl}_3$ ):  $\delta$  203.9, 143.6, 138.2, 136.5, 132.5, 131.5, 131.5, 129.6, 129.6, 128.2, 127.8, 126.0, 123.8, 120.4, 119.5, 117.1, 110.6, 82.9, 53.8, 25.6, 24.8, 24.7; HRMS (ESI $^+$ )  $[\text{M}+\text{H}]^+$ : Calcd for  $\text{C}_{30}\text{H}_{33}\text{O}_3\text{BN}$ : 465.2584 m/z, found: 465.2584 m/z; Specific rotation:  $[\alpha]_{\text{D}}^{20} -66.3$  ( $c$  1.00,  $\text{CHCl}_3$ ) for an enantiomerically enriched sample of 93:7 e.r.

Enantiomeric purity of **9j** was determined by HPLC analysis in comparison with authentic racemic material (93:7 e.r. shown; Chiralcel OZ-H column, 98:2 hexanes/ *i*PrOH, 0.8 mL/min, 254 nm).

&lt;Chromatogram&gt;

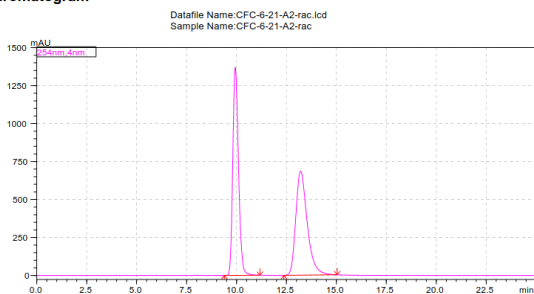

&lt;Peak Table&gt;

| Peak# | Ret. Time | Height  | Height% | Area     | Area%   |
|-------|-----------|---------|---------|----------|---------|
| 1     | 9.940     | 1369121 | 66.616  | 27305267 | 50.027  |
| 2     | 13.211    | 686115  | 33.384  | 27273392 | 49.973  |
| Total |           | 2055236 | 100.000 | 54580659 | 100.000 |

&lt;Chromatogram&gt;

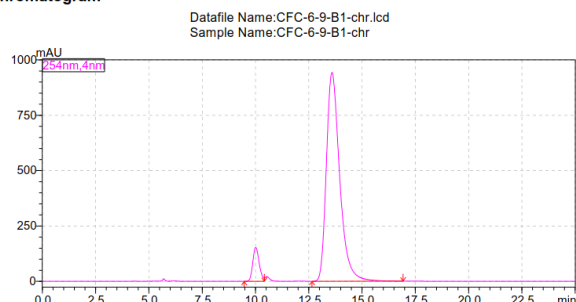

&lt;Peak Table&gt;

| Peak# | Ret. Time | Area     | Height  | Area%   |
|-------|-----------|----------|---------|---------|
| 1     | 10.011    | 3217185  | 152858  | 7.265   |
| 2     | 13.590    | 41067999 | 942984  | 92.735  |
| Total |           | 44285184 | 1095843 | 100.000 |

| Peak # | Time (min) | Area (%) | Peak # | Time (min) | Area (%) |
|--------|------------|----------|--------|------------|----------|
| 1      | 9.940      | 50.027   | 1      | 10.011     | 7.265    |
| 2      | 13.211     | 49.973   | 2      | 13.590     | 92.735   |

**tert-Butyl (R)-4-(6-(2-methyl-1-oxo-1-phenyl-3-(4,4,5,5-tetramethyl-1,3,2-dioxaborolan-2-yl)propan-2-yl)naphthalen-2-yl)piperazine-1-carboxylate (9k).** Yield: (93.4 mg, 80%); **IR (neat):** 2973 (m), 2935 (w), 1691 (m), 1598 (m), 1498 (m), 1450 (m), 1388 (m), 1354 (s), 1314 (s), 1246 (m), 1164 (s), 1142 (m), 1041 (m), 968 (m), 870 (m), 847 (m), 757 (m), 715 (m), 689 (s), 647 (m)  $\text{cm}^{-1}$ ;  **$^1\text{H}$  NMR (400 MHz,  $\text{CDCl}_3$ ):**  $\delta$  7.77 (s, 1H), 7.72 (d,  $J = 9.0$  Hz, 1H), 7.64 (d,  $J = 8.8$  Hz, 1H), 7.48 – 7.43 (m, 2H), 7.37 – 7.23 (m, 3H), 7.14 (t,  $J = 7.8$  Hz, 2H), 7.09 (d,  $J = 2.2$  Hz, 1H), 3.69 – 3.55 (m, 4H), 3.29 – 2.99 (m, 4H), 1.85 (s, 4H), 1.65 (d,  $J = 15.6$  Hz, 1H), 1.50 (s, 9H), 1.39 (d,  $J = 15.6$  Hz, 1H), 1.20 (s, 6H), 1.17 (s, 6H);  **$^{13}\text{C}$  NMR (100 MHz,  $\text{CDCl}_3$ ):**  $\delta$  204.2, 154.7, 149.0, 141.4, 136.7, 133.2, 131.3, 129.6, 128.9, 128.8, 127.7, 127.4, 125.4, 123.5, 119.9, 110.5, 82.8, 79.9, 53.6, 49.6, 28.4, 25.5, 24.8, 24.7; **HRMS (ESI $^+$ ) [M+H] $^+$ :** Calcd for  $\text{C}_{35}\text{H}_{46}\text{BN}_2\text{O}_5$ : 584.3531 m/z, found: 584.3527 m/z; Specific rotation:  $[\alpha]_{\text{D}}^{20} -75.9$  ( $c$  1.00,  $\text{CHCl}_3$ ) for an enantiomerically enriched sample of 94:6 e.r.

Enantiomeric purity of **9k** was determined by HPLC analysis in comparison with authentic racemic material (94:6 e.r. shown; Chiralcel OZ-H column, 98:2 hexanes/ *i*PrOH, 0.8 mL/min, 254 nm).

&lt;Chromatogram&gt;

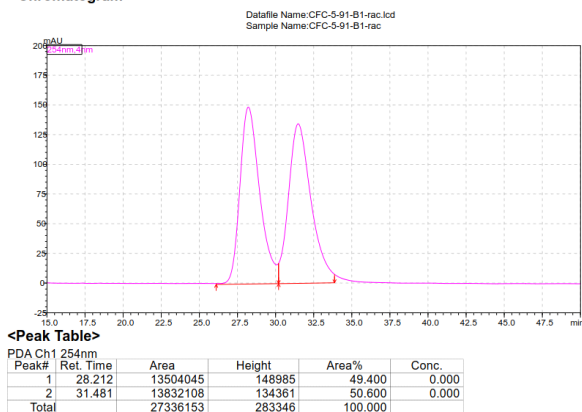

&lt;Chromatogram&gt;

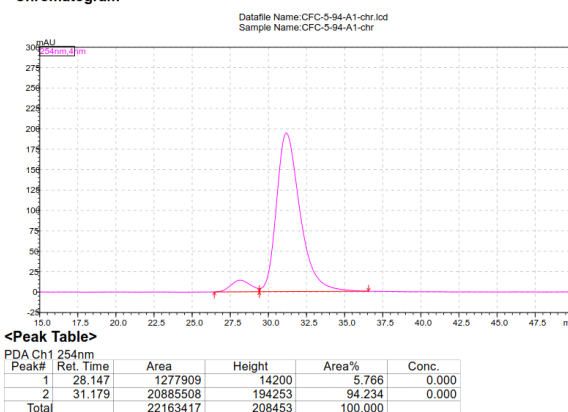

| Peak # | Time (min) | Area (%) | Peak # | Time (min) | Area (%) |
|--------|------------|----------|--------|------------|----------|
| 1      | 28.212     | 49.400   | 1      | 28.147     | 5.766    |
| 2      | 31.481     | 50.600   | 2      | 31.179     | 94.234   |

■ **Experimental Procedure for Gram Scale Synthesis of Phosphine-Cu-Catalyzed Reactions of  $\text{B}_2(\text{pin})_2$ , 2-(prop-1-en-2-yl)naphthalene and Acetophenone:** In a  $\text{N}_2$ -filled glove-box, an oven-dried flask (100 mL) with a magnetic stir bar was charged with (*R,R*)-Ph-BPE **6i** (0.15 g, 0.3 mmol, 3 mol%),  $\text{LiOt-Bu}$  (1.20 g, 15 mmol, 1.5 equiv) and tetrahydrofuran (thf, 30 mL). The solution was allowed to stir at 22 °C for one hour.

Bis(pinacolato)diboron (3.81 g, 15 mmol, 1.5 equiv) was added to the solution, causing it to turn dark brown immediately. The mixture was allowed to stir at 22 °C for 30 min under an atmosphere of N<sub>2</sub>. 2-(prop-1-en-2-yl)naphthalene (2.52 g, 15 mmol, 1.5 equiv) and acetophenone (1.20 g, 10 mmol, 1.0 equiv) were added. The resulting solution was allowed to stir at 22 °C for 16 h before the reaction was quenched by passing the mixture through a short plug of celite and silica gel and eluted with Et<sub>2</sub>O (3 × 30 mL). The filtrate was concentrated *in vacuo* to provide yellow oil. The crude was purified by silica gel chromatography (petroleum ether : ethyl acetate = 15:1) to afford **7m** as white solid (2.64 g, 85% yield).

■ **Experimental Procedure for Gram Scale Synthesis of Phosphine–Cu-Catalyzed Reactions of B<sub>2</sub>(pin)<sub>2</sub>, 2-(prop-1-en-2-yl)naphthalene and 4-chlorophenol ester:** In a N<sub>2</sub>-filled glove-box, an oven-dried flask (50 mL) with a magnetic stir bar was charged with NHC–Cu complex **6j** (0.43 g, 0.8 mmol, 10 mol%), LiO*t*-Bu (0.96 g, 12 mmol, 1.5 equiv) and tetrahydrofuran (thf, 20 mL). The solution was allowed to stir at 22 °C for one hour. Bis(pinacolato)diboron (3.05 g, 12 mmol, 1.5 equiv) was added to the solution, causing it to turn dark brown immediately. The mixture was allowed to stir at 22 °C for 30 min under an atmosphere of N<sub>2</sub>. 2-(prop-1-en-2-yl)naphthalene (1.34 g, 8 mmol, 1 equiv) and *p*-Cl-phenyl benzoate (2.78 g, 12 mmol, 1.5 equiv) were added. The resulting solution was allowed to stir at 22 °C for 16 h before the reaction was quenched by passing the mixture through a short plug of celite and silica gel and eluted with Et<sub>2</sub>O (3 × 20 mL). The filtrate was concentrated *in vacuo* to provide yellow oil. The crude was purified by silica gel chromatography (petroleum ether : ethyl acetate = 60:1) to afford **9f** as white solid (1.95 g, 67% yield).

■ **Representative Experimental Procedure for Pd-Catalyzed Cross Coupling of 7m.**

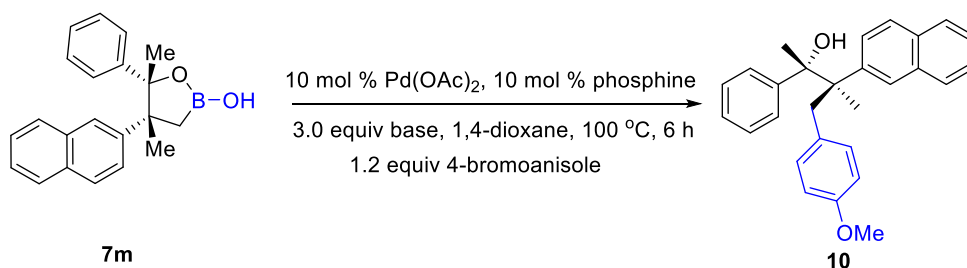

In a 15-mL Schlenk flask, Cs<sub>2</sub>CO<sub>3</sub> (195.5 mg, 0.6 mmol, 3.0 equiv), Pd(OAc)<sub>2</sub> (4.5 mg, 0.02 mmol, 10 mol%), RuPhos (9.2 mg, 10 mol%) and **7m** (63.2 mg, 0.2 mmol, 1.0 equiv) were dissolved in 1 mL of 1,4-dioxane were added followed by addition of 4-bromoanisole (46.6 mg, 0.24 mmol, 1.2 equiv). The tube was sealed and the reaction was allowed to stir at 100°C for 6 h. The reaction mixture was cooled down to room temperature, quenched with 1.5 mL of a 1/1 (v:v) Na<sub>2</sub>S<sub>2</sub>O<sub>3</sub> (sat.)/NaHCO<sub>3</sub> (sat.) solution, washed with EtOAc (3 x 2 mL). The organic phases were dried over MgSO<sub>4</sub> and concentrated under vacuum. The resulting solid was purification by silica gel chromatography (petroleum ether : ethyl acetate = 10:1) as colorless oil (49.5 mg, 0.13 mmol, 64% yield).

(*2S,3S*)-4-(4-Methoxyphenyl)-3-methyl-3-(naphthalen-2-yl)-2-phenylbutan-2-ol (**10**). Yield: (49.5 mg, 64%); IR (neat): 3317 (br), 2923 (w), 2885 (w), 1548 (m), 1488 (m), 1432 (m), 1387 (m), 1378 (s), 1325 (s), 1242 (m), 1143 (s), 1121 (m), 1015 (m), 957 (m), 860 (m), 831 (m), 765 (m), 700 (m), 670 (s), 645 (m)  $\text{cm}^{-1}$ ;  $^1\text{H NMR}$  (400 MHz,  $\text{CDCl}_3$ ):  $\delta$  7.81 (d,  $J = 7.8$  Hz, 1H), 7.71 (t,  $J = 6.4$  Hz, 2H), 7.60 (s, 1H), 7.53 - 7.38 (m, 3H), 7.23 - 7.17 (m, 5H), 6.72 (d,  $J = 8.2$  Hz, 2H), 6.49 (d,  $J = 7.6$  Hz, 2H), 3.67 (d,  $J = 13.8$  Hz, 1H), 3.60 (s, 3H), 3.07 (d,  $J = 13.8$  Hz, 1H), 1.80 (s, 1H), 1.66 (s, 3H), 1.35 (s, 3H);  $^{13}\text{C NMR}$  (100 MHz,  $\text{CDCl}_3$ ):  $\delta$  157.5, 145.0, 140.0, 132.6, 131.9, 131.4, 130.9, 128.8, 128.3, 128.2, 127.7, 127.2, 126.7, 126.6, 125.9, 125.7, 125.6, 112.9, 78.9, 54.9, 50.4, 39.8, 26.3, 21.2; HRMS ( $\text{ESI}^+$ )  $[\text{M}+\text{NH}_4]^+$ : Calcd for  $\text{C}_{28}\text{H}_{32}\text{NO}_2$ : 414.2428  $m/z$ , found: 414.2416  $m/z$ .

Enantiomeric purity of **10** was determined by HPLC analysis in comparison with authentic racemic material (95:5 d.r., >99:1 e.r. shown; Chiralcel OZ-H column, 98:2 hexanes/ *i*PrOH, 0.8 mL/min, 254 nm).

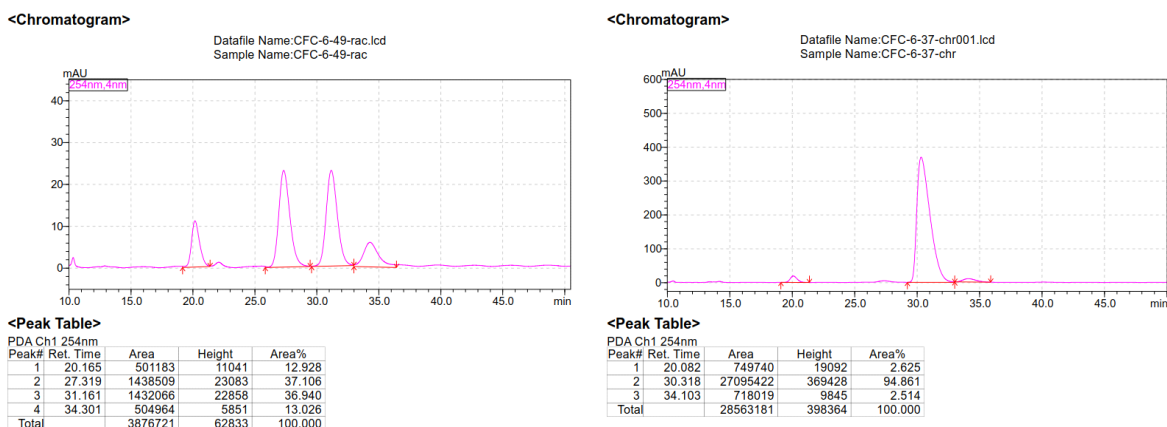

| Peak # | Time (min) | Area (%) | Peak # | Time (min) | Area (%) |
|--------|------------|----------|--------|------------|----------|
| 1      | 20.165     | 12.928   | 1      | 20.082     | 2.625    |
| 2      | 27.319     | 37.106   | 2      |            |          |
| 3      | 31.161     | 36.940   | 3      | 30.318     | 94.861   |
| 4      | 34.301     | 13.026   | 4      | 34.103     | 2.514    |

### ■ Representative Experimental Procedure for Pd-Catalyzed Suzuki Coupling of **9f**.

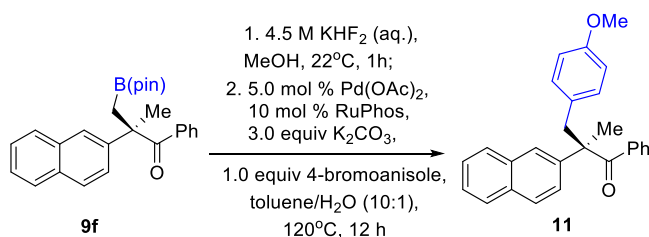



To a stirred solution of boronic ester **9f** (80.0 mg, 0.2 mmol, 1.0 equiv) in methanol (2 mL) was added  $\text{KHF}_2$  (0.2 mL of 4.5 M saturated aqueous solution, 0.9 mmol, 4.5 equiv) dropwise at ambient temperature and the reaction mixture was allowed to stir for 1 hour. The reaction mixture was concentrated in vacuo to provide white solid, which was used in the next step without further purification. In a 15-mL Schlenk flask,  $\text{K}_2\text{CO}_3$  (82.8 mg, 0.6 mmol, 3.0 equiv),  $\text{Pd}(\text{OAc})_2$  (2.2 mg, 0.01 mmol, 5.0 mol%), RuPhos (9.2 mg, 10 mol%) and the potassium trifluoroborate were dissolved in 1 mL of toluene and 0.10 mL of water were added followed by addition of 4-bromoanisole (37.2 mg, 0.2 mmol, 1.0 equiv). The tube was sealed and the reaction was allowed to stir at 120°C for 12 h. The reaction mixture was cooled down to room temperature, quenched with 1.5 mL of a 1/1 (v:v)  $\text{Na}_2\text{S}_2\text{O}_3$  (sat.)/ $\text{NaHCO}_3$  (sat.) solution, washed with EtOAc (3 x 2 mL). The organic phases were dried over  $\text{MgSO}_4$  and concentrated under vacuum. The resulting solid was purification by silica gel chromatography (petroleum ether : ethyl acetate = 20:1) as white solid (69.0 mg, 0.17 mmol, 86% yield).

**(R)-3-(4-Methoxyphenyl)-2-methyl-2-(naphthalen-2-yl)-1-phenylpropan-1-one**

**11. Yield:** (69.0 mg, 86%); **IR (neat):** 3055 (m), 2973 (m), 2931 (m), 2833 (m), 1672 (s), 1608 (m), 1579 (m), 1509 (s), 1456 (m), 1356 (m), 1243 (s), 1177 (s), 1127 (m), 1033 (s), 966 (s), 847 (m), 747 (m), 664 (m), 628 (s), 542 (m)  $\text{cm}^{-1}$ ;  **$^1\text{H}$  NMR (400 MHz,  $\text{CDCl}_3$ ):**  $\delta$  7.88 - 7.76 (m, 3H), 7.67 (d,  $J = 1.4$  Hz, 1H), 7.54 - 7.50 (m, 4H), 7.37 - 7.29 (m, 2H), 7.19 (t,  $J = 7.8$  Hz, 2H), 6.67 - 6.51 (m, 4H), 3.71 (s, 3H), 3.49 - 3.37 (m, 2H), 1.67 (s, 3H);  **$^{13}\text{C}$  NMR (100 MHz,  $\text{CDCl}_3$ ):**  $\delta$  204.0, 143.8, 136.5, 133.5, 132.1, 131.4, 129.6, 128.5, 127.9, 127.8, 127.5, 126.1, 125.7, 124.9, 123.7, 82.8, 53.8, 25.5, 24.7, 24.6; **HRMS (ESI $^+$ )  $[\text{M}+\text{H}]^+$ :** Calcd for  $\text{C}_{27}\text{H}_{25}\text{O}_2$ : 381.1844 m/z, found: 381.1849 m/z; Specific rotation:  $[\alpha]_{\text{D}}^{20}$   $-244.8$  ( $c$  1.00,  $\text{CHCl}_3$ ) for an enantiomerically enriched sample of 95:5 e.r.

Enantiomeric purity of **11** was determined by HPLC analysis in comparison with authentic racemic material (95:5 e.r. shown; Chiralcel OZ-H column, 97:3 hexanes/ *i*PrOH, 0.8 mL/min, 220 nm).

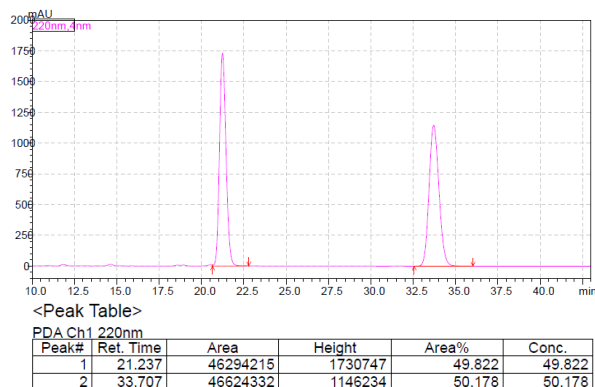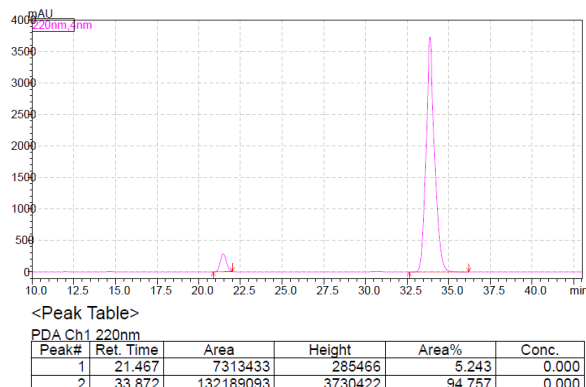

| Peak # | Time (min) | Area (%) | Peak # | Time (min) | Area (%) |
|--------|------------|----------|--------|------------|----------|
| 1      | 21.237     | 49.822   | 1      | 21.467     | 5.243    |

|   |        |        |   |        |        |
|---|--------|--------|---|--------|--------|
| 2 | 33.707 | 50.178 | 2 | 33.872 | 94.757 |
|---|--------|--------|---|--------|--------|

### ■ Representative Experimental Procedure for Oxidative of 3t.

**3t** (109.6 mg, 0.29 mmol, 1 equiv) was dissolved in tetrahydrofuran (thf, 1.0 mL). NaBO<sub>3</sub>•4H<sub>2</sub>O (178.5 mg, 1.16 mmol, 4.0 equiv) and H<sub>2</sub>O (1 mL) were added. The resulting mixture was allowed to stir at 22 °C for three hours. The reaction mixture quenched with 5 mL 20 % NaOH solution. The aqueous layer was washed with Et<sub>2</sub>O (3 × 2 mL). The combined organic layers were concentrated *in vacuo* to provide colorless oil, which was purified by silica gel chromatography (petroleum ether : ethyl acetate = 5:1) to afford **12** as white solid (98.2 mg, 0.26 mmol, 92% yield).

### ■ Cu-catalyzed Intramolecular Oxygenation of 12.

An oven-dried Schlenk flask was charged with CuI (3.8 mg, 0.02 mmol), ligand (4.3 mg, 0.03 mmol), Cs<sub>2</sub>CO<sub>3</sub> (65.2 mg, 0.20 mmol), **12** (37.4 mg, 0.10 mmol) and a magnetic stir bar. Anhydrous MeCN (1 mL) were then added. The reaction mixture was heated in oil bath and stirred vigorously for 12 h at 60 °C. The reaction mixture was allowed to cool to room temperature, diluted with ethyl acetate (5 mL), filtered through a plug of silica gel, and further eluted with additional ethyl acetate (5 mL). The filtrate was concentrated and the resulting residue was purified by flash chromatography (petroleum ether : ethyl acetate = 15:1) to provide the desired product. (29.0 mg colourless oil, 0.1 mmol, 98 % yield).

**(3*S*,4*S*)-3-(Benzofuran-2-yl)-3,4-dimethylchroman-4-ol (14)**. Yield: (29.0 mg, 98%); IR (neat): 3353 (br), 2921 (m), 2867 (w), 1580 (w), 1434 (m), 1400 (m), 1334 (m), 1267 (m), 1234 (s), 1123 (m), 1002 (m), 924 (m), 840 (m), 794 (s), 735 (s), 691 (m) cm<sup>-1</sup>; <sup>1</sup>H NMR (400 MHz, CDCl<sub>3</sub>): δ 7.57 (d, *J* = 7.8 Hz, 1H), 7.53 (d, *J* = 7.6 Hz, 1H), 7.47 (d, *J* = 8.2 Hz, 1H), 7.30 - 7.17 (m, 3H), 6.99 (t, *J* = 7.6 Hz, 1H), 6.86 (d, *J* = 8.2 Hz, 1H), 6.55 (s, 1H), 4.59 (d, *J* = 11.2 Hz, 1H), 4.35 (d, *J* = 11.2 Hz, 1H), 2.31 (s, 1H), 1.54 (s, 3H), 1.42 (s, 3H); <sup>13</sup>C NMR (100 MHz, CDCl<sub>3</sub>): δ 159.3, 154.2, 152.4, 128.9, 128.0, 127.9, 126.9, 123.9, 122.9, 121.3, 120.7, 116.2, 111.1, 103.1, 72.6, 70.1, 42.4, 29.1, 18.1; HRMS (ESI<sup>+</sup>) [M+H]<sup>+</sup>: Calcd for: C<sub>19</sub>H<sub>19</sub>O<sub>3</sub>: 294.1365 m/z, found: 294.1360 m/z; Specific rotation: [α]<sub>D</sub><sup>20</sup> -93.7 (*c*, CHCl<sub>3</sub>) for an enantiomerically enriched sample of >99:1 e.r.

Enantiomeric purity of **14** was determined by HPLC analysis in comparison with authentic racemic material (>99:1 e.r. shown; Chiralcel IG column, 98:2 hexanes/ *i*PrOH, 0.8 mL/min, 254 nm).

&lt;Chromatogram&gt;

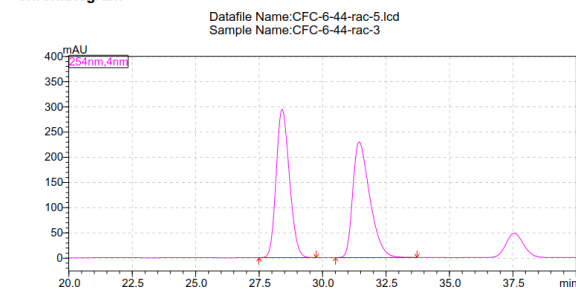

&lt;Peak Table&gt;

| Peak# | Ret. Time | Area     | Height | Area%   |
|-------|-----------|----------|--------|---------|
| 1     | 28.402    | 10681934 | 294182 | 49.965  |
| 2     | 31.439    | 10696894 | 229302 | 50.035  |
| Total |           | 21378828 | 523484 | 100.000 |

&lt;Chromatogram&gt;

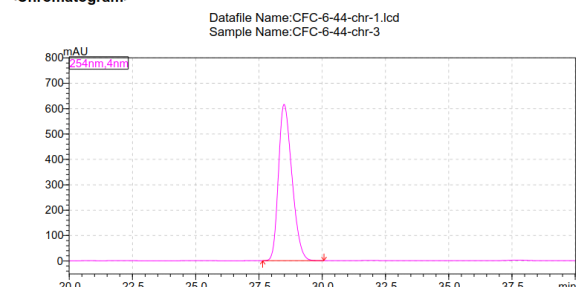

&lt;Peak Table&gt;

| Peak# | Ret. Time | Area     | Height | Area%   |
|-------|-----------|----------|--------|---------|
| 1     | 28.493    | 22879394 | 615930 | 100.000 |
| Total |           | 22879394 | 615930 | 100.000 |

| Peak # | Time (min) | Area (%) | Peak # | Time (min) | Area (%) |
|--------|------------|----------|--------|------------|----------|
| 1      | 28.402     | 49.965   | 1      | 28.493     | >99.000  |
| 2      | 31.439     | 50.035   | 2      |            | <1.000   |

■ **Representative Experimental Procedure for Oxidative of 4a and Reduction of 4a-oxi with Me<sub>2</sub>NHB(OAc)**. 4a (78.0 mg, 0.2 mmol, 1.0 equiv) was dissolved in tetrahydrofuran (thf, 1.0 mL). NaBO<sub>3</sub>•4H<sub>2</sub>O (123.1 mg, 0.80 mmol, 4.0 equiv) and H<sub>2</sub>O (1 mL) were added. The resulting mixture was allowed to stir at 22 °C for three hours. The aqueous layer was washed with Et<sub>2</sub>O (3 × 2 mL). The combined organic layers were concentrated *in vacuo* to provide colorless oil, which was purified by silica gel chromatography (petroleum ether : ethyl acetate = 5:1) to afford **4a-oxi** as white solid (47.6 mg, 0.17 mmol, 85% yield).

To a solution of Me<sub>2</sub>NHB(OAc)<sub>3</sub> (328 mg, 1.25 mmol, 5 equiv) in 0.5 mL of acetonitrile and 1 mL of acetic acid at room temperature was added a solution of 70 mg of **4a-oxi** in 0.5 mL of acetonitrile. The mixture was allowed to stir for 5 minutes at 22 °C. The mixture was poured into 4 mL of saturated sodium bicarbonate solution. The mixture was washed with CH<sub>2</sub>Cl<sub>2</sub> (3 x 2 mL), the organic solution was concentrated *in vacuo*. HPLC analysis revealed the presence of a 4:1 ratio of diastereomers. The mixture was purified by silica gel chromatography (petroleum ether : ethyl acetate = 3:1) to afford **15** as white solid (46.6 mg, 0.165 mmol, 66% yield).

**(R)-2-(Benzofuran-2-yl)-3-hydroxy-2-methyl-1-phenylpropan-1-one (4a-oxi)**. Yield: (47.6 mg, 85%); **IR (neat)**: 3540 (w), 3405 (br, m), 3064 (w), 2993 (m), 2936 (m), 1678 (s), 1660 (s), 1594 (m), 1577 (m), 1451 (s), 1380 (m), 1249 (s), 1222 (s), 1167 (m), 1038 (w), 1003 (s), 950 (s), 855 (s), 750 (s), 682 (s), 565 (m) cm<sup>-1</sup>; **<sup>1</sup>H NMR (400 MHz, CDCl<sub>3</sub>)**: δ 7.71 - 7.64 (m, 2H), 7.60 - 7.55 (m, 1H), 7.47 - 7.38 (m, 2H), 7.31 - 7.21 (m, 4H), 6.74 (s, 1H), 4.29 (d, *J* = 11.4 Hz, 1H), 3.78 (d, *J* = 11.4 Hz, 1H), 2.76 (s, 1H), 1.85 (s, 3H); **<sup>13</sup>C NMR (100 MHz, CDCl<sub>3</sub>)**: δ 201.7, 157.6, 154.8, 135.7, 132.8, 129.0, 128.4, 128.2, 124.3, 123.0, 121.0, 111.4, 103.7, 69.3, 53.5, 19.4; **HRMS (ESI<sup>+</sup>) [M+H]<sup>+</sup>**: Calcd for C<sub>18</sub>H<sub>17</sub>O<sub>3</sub>: 281.1171 m/z, found: 281.1172 m/z; Specific rotation: [α]<sub>D</sub><sup>20</sup> -114.7 (*c* 1.00, CHCl<sub>3</sub>) for an enantiomerically enriched sample of 95:5 e.r.

Enantiomeric purity of **4a-oxi** was determined by HPLC analysis in comparison with authentic racemic material (95:5 e.r. shown; Chiralcel OZ-H column, 97:3 hexanes/ *i*PrOH, 0.8 mL/min, 254 nm).

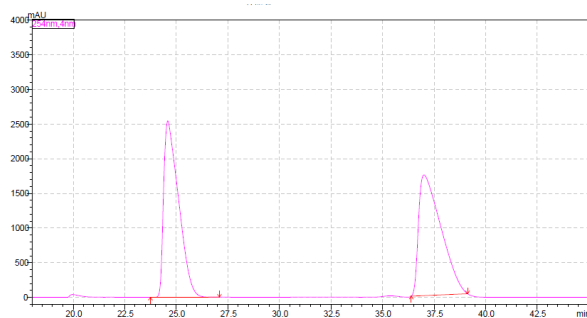

&lt;Peak Table&gt;

| Peak# | Ret. Time | Area      | Height  | Area%  | Conc. |
|-------|-----------|-----------|---------|--------|-------|
| 1     | 24.587    | 127753696 | 2545654 | 49.431 | 0.000 |
| 2     | 37.011    | 130696223 | 1740854 | 50.569 | 0.000 |

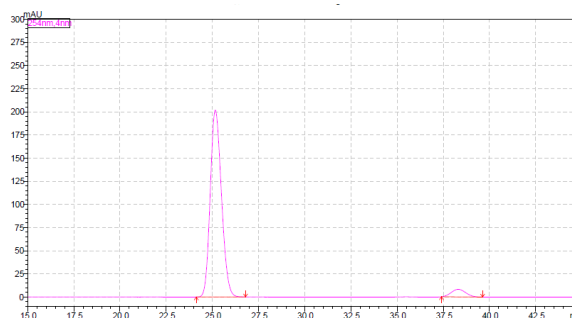

&lt;Peak Table&gt;

| Peak# | Ret. Time | Area    | Height | Area%  | Conc. |
|-------|-----------|---------|--------|--------|-------|
| 1     | 25.159    | 8525086 | 201859 | 95.010 | 0.000 |
| 2     | 38.305    | 447753  | 8213   | 4.990  | 0.000 |

| Peak # | Time (min) | Area (%) | Peak # | Time (min) | Area (%) |
|--------|------------|----------|--------|------------|----------|
| 1      | 24.587     | 49.431   | 1      | 25.159     | 95.010   |
| 2      | 37.011     | 50.569   | 2      | 38.305     | 4.990    |

**(1*R*,2*S*)-2-(Benzofuran-2-yl)-2-methyl-1-phenylpropane-1,3-diol 15**. Yield: (46.6 mg, 66%); **IR (neat)**: 3383 (br, m), 3061 (w), 2921 (s), 2851 (m), 1718 (m), 1578 (m), 1453 (s), 1374 (m), 1303 (m), 1253 (s), 1169 (m), 1024 (s), 957 (m), 914 (m), 850 (w), 749 (s), 702 (s), 627 (m), 548 (m)  $\text{cm}^{-1}$ ;  **$^1\text{H}$  NMR (400 MHz,  $\text{CDCl}_3$ )**:  $\delta$  7.50 (dd,  $J = 13.6, 7.8$  Hz, 2H), 7.31 - 7.20 (m, 5H), 7.17 - 7.14 (m, 2H), 6.49 (s, 1H), 5.15 (d,  $J = 3.4$  Hz, 1H), 3.90 - 3.87 (m, 1H), 3.85 - 3.76 (m, 1H), 2.82 (d,  $J = 4.2$  Hz, 1H), 2.30 (s, 1H), 1.32 (s, 3H);  **$^{13}\text{C}$  NMR (100 MHz,  $\text{CDCl}_3$ )**:  $\delta$  159.9, 154.5, 140.0, 128.1, 127.9, 127.8, 127.34, 123.9, 122.8, 120.8, 111.1, 104.9, 78.0, 68.1, 47.2, 17.0; **HRMS (ESI $^+$ )**  $[\text{M}+\text{NH}_4]^+$ : Calcd for  $\text{C}_{18}\text{H}_{22}\text{NO}_3$ : 300.1594  $m/z$ , found: 300.1594  $m/z$ ; Specific rotation:  $[\alpha]_{\text{D}}^{20}$  58.6 ( $c$  0.50,  $\text{CHCl}_3$ ) for an enantiomerically enriched sample of 94:6 e.r.

Enantiomeric purity of **15** was determined by HPLC analysis in comparison with authentic racemic material (94:6 e.r. shown; Chiralcel IC column, 95:5 hexanes/ *i*PrOH, 0.8 mL/min, 254 nm).

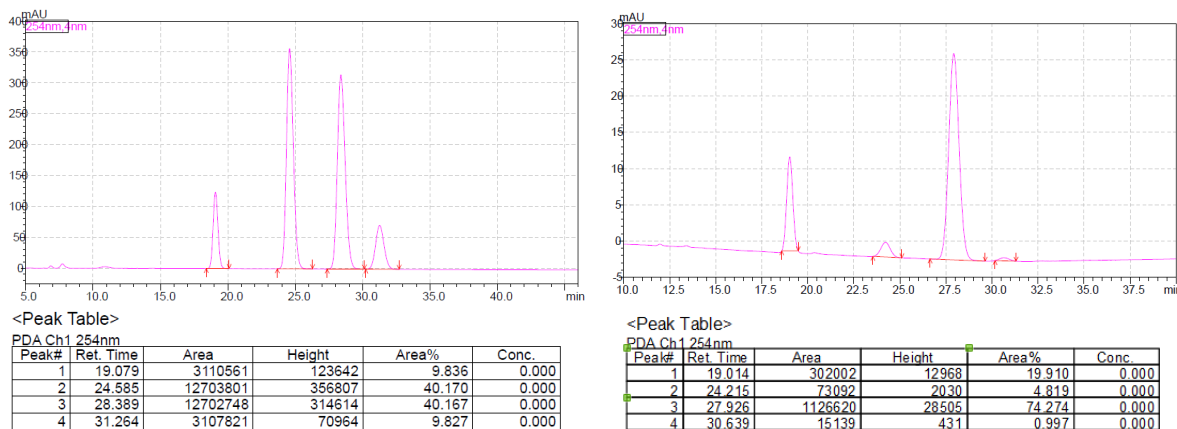

| Peak # | Time (min) | Area (%) | Peak # | Time (min) | Area (%) |
|--------|------------|----------|--------|------------|----------|
| 1      | 19.079     | 9.836    | 1      | 19.014     | 19.910   |
| 2      | 24.585     | 40.170   | 2      | 24.215     | 4.819    |
| 3      | 28.389     | 40.167   | 3      | 27.926     | 74.274   |
| 4      | 31.264     | 9.827    | 4      | 30.639     | 0.997    |

Relative stereochemistry of **15** was determined through NOESY experimental study after protecting 1,3-diol **15** with 2,2-dimethoxypropane. The experimental procedure for protecting 1,3-diol as follow:

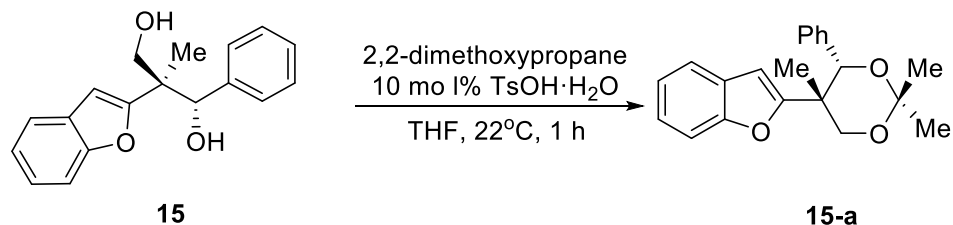

2,2-Dimethoxy propane (1 mL, 8 mmol) and *p*-toluene sulfonic acid monohydrate (3.0 mg, 0.016 mmol) were added to a solution of **15** (45 mg, 0.16 mmol) in THF (1 mL). The resulting solution was allowed to stir for 1 h at room temperature. The mixture was poured into 4 mL of 10% sodium hydroxide solution. The mixture was washed with Et<sub>2</sub>O (3 x 2 mL), the organic solution was concentrated in vacuo. The residue was purified by silica gel column chromatography (petroleum ether : ethyl acetate = 50:1) to give **15-a** as white solid (43.9 mg, 0.137 mmol, 86% yield).

**2-((4*R*,5*R*)-2,2,5-Trimethyl-4-phenyl-1,3-dioxan-5-yl)benzofuran 15-a.** Yield: (43.9 mg, 86%); IR (neat): 2992 (m), 2965 (m), 2940 (m), 1572 (m), 1452 (s), 1378 (s), 1359 (m), 1328 (m), 1249 (s), 1196 (s), 1110 (s), 1069 (s), 1027 (s), 927 (m), 866 (m), 814 (m), 749 (s), 706 (s), 620 (m), 561 (m) cm<sup>-1</sup>; <sup>1</sup>H NMR (400 MHz, CDCl<sub>3</sub>): δ 7.58 - 7.53 (m, 1H), 7.23 - 7.09 (m, 6H), 7.06 - 6.98 (m, 3H), 4.89 (s, 1H), 4.07 (s, 2H), 1.68 (s, 3H), 1.66 (s, 3H), 1.28 (s, 3H); <sup>13</sup>C NMR (100 MHz, CDCl<sub>3</sub>): δ 158.5, 153.6, 137.6, 128.7, 127.8, 127.5, 127.3, 123.1,

122.2, 120.5, 110.7, 105.5, 99.5, 79.7, 69.9, 40.4, 29.5, 18.7, 18.6; Specific rotation:  $[\alpha]_D^{20}$  162.8 (*c* 0.20,  $\text{CHCl}_3$ ).

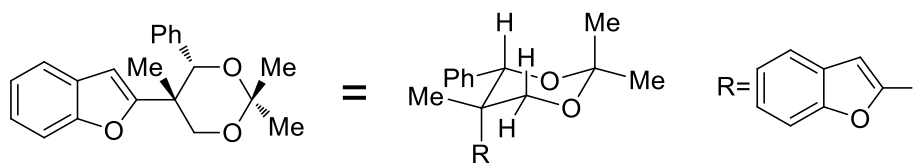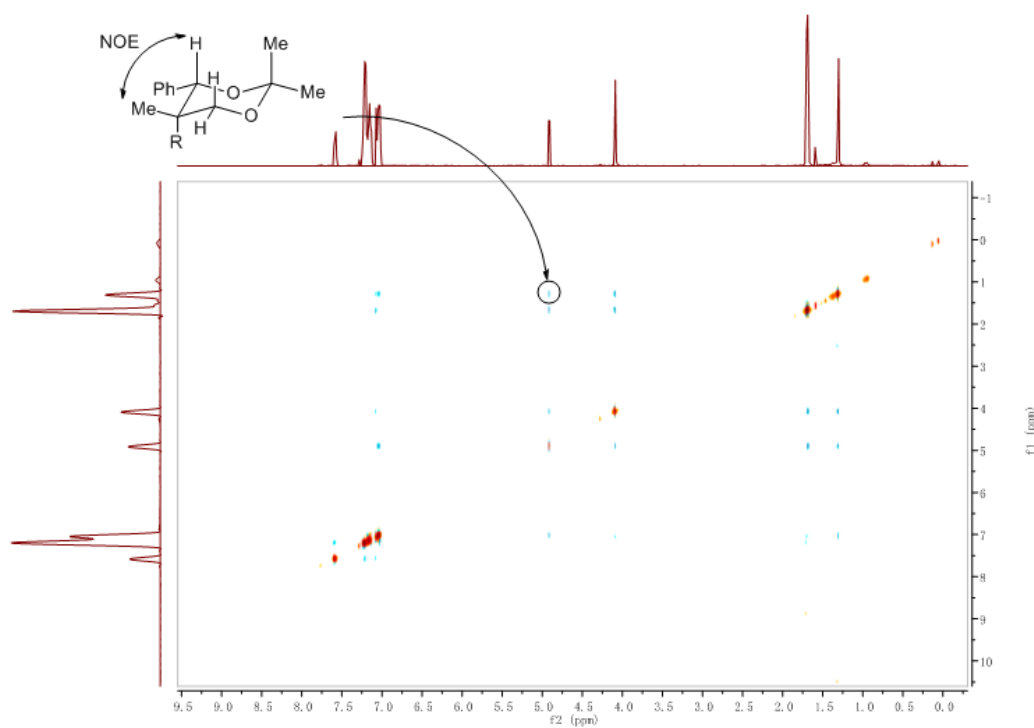

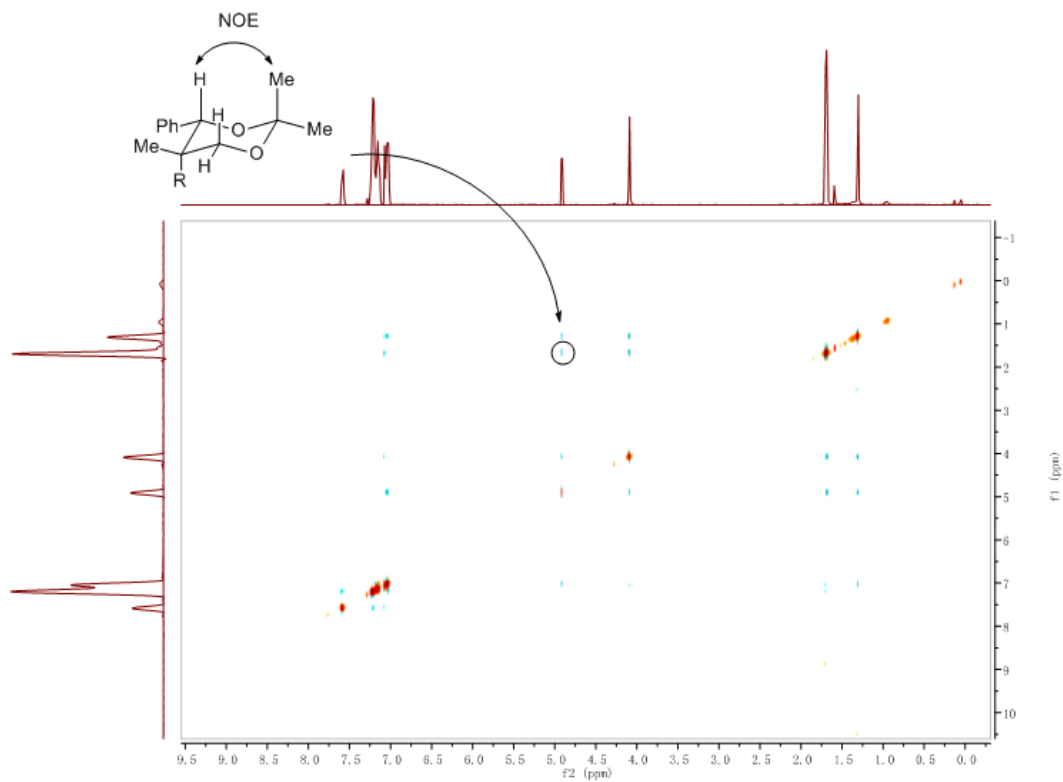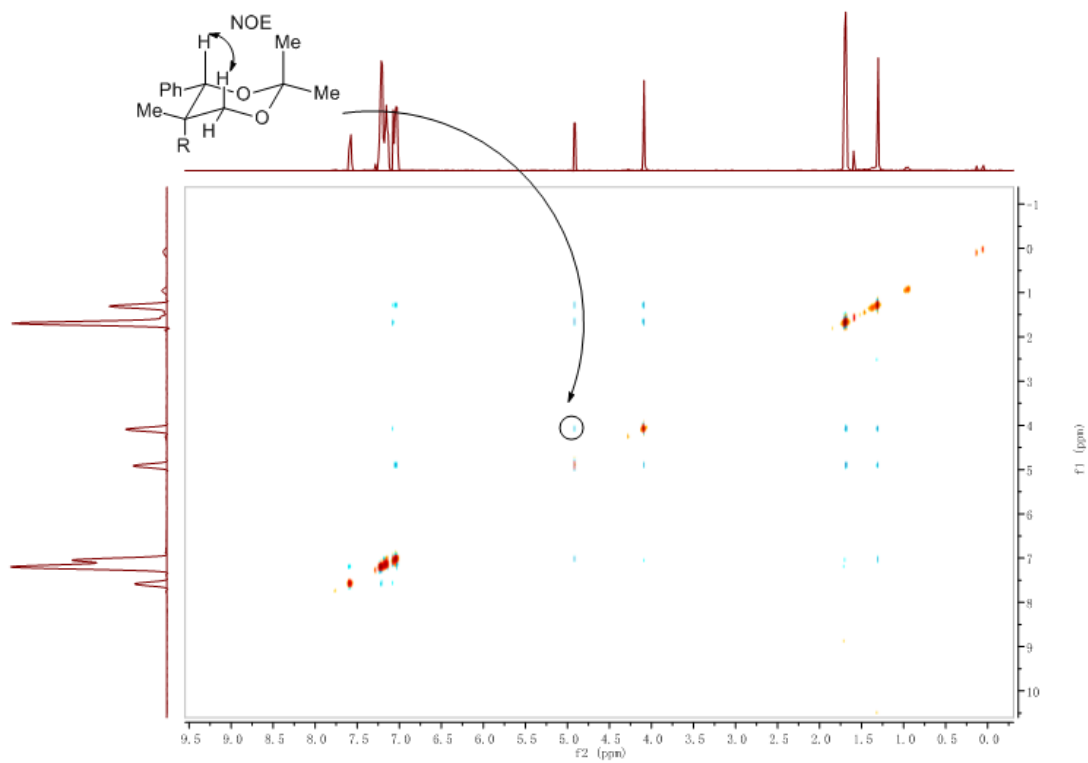

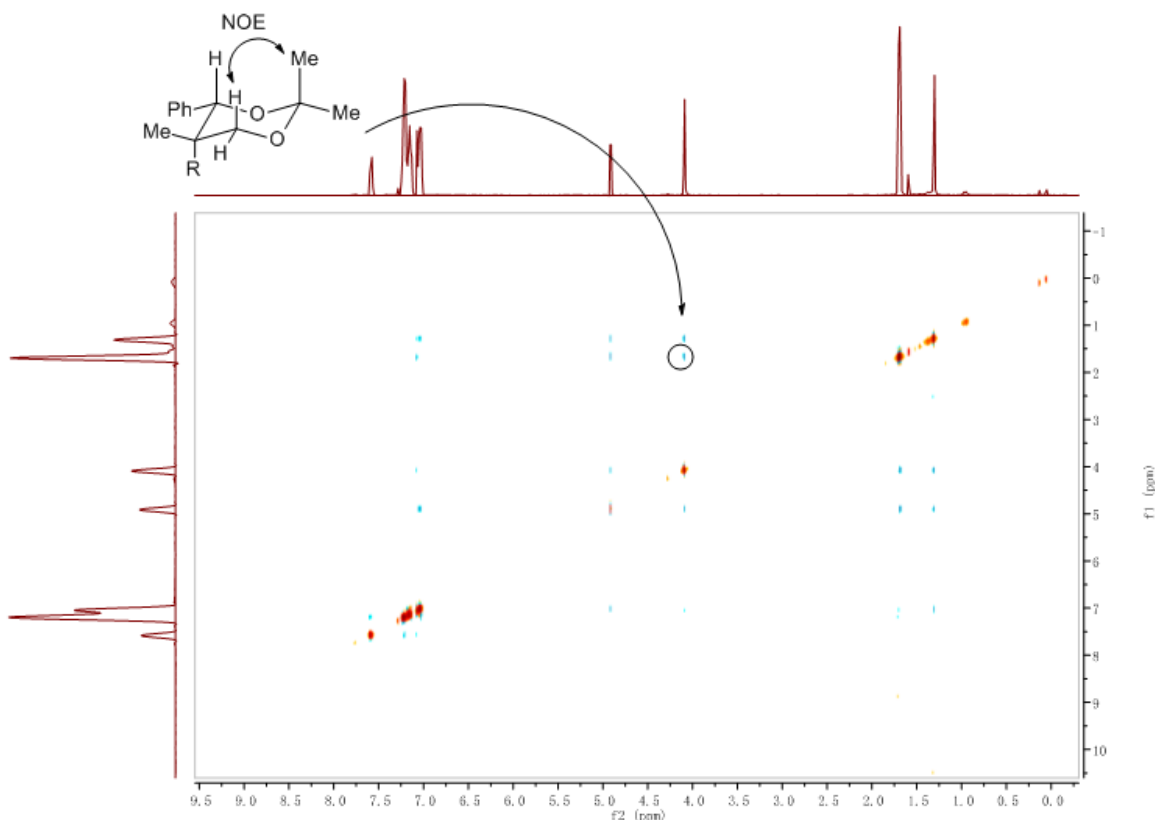

■ **Representative Experimental Procedure for Phosphine–Cu-Catalyzed Reactions of  $B_2(\text{pin})_2$ , Alkene and MeOH.** In a  $N_2$ -filled glove-box, an oven-dried vial (4 mL, 17 × 38 mm) with a magnetic stir bar was charged with phosphine ligand **6i** (0.01 mmol, 5 mol %), CuCl (1.0 mg, 0.01 mmol, 5 mol%), NaOt-Bu (3.8 mg, 0.04 mmol, 0.2 equiv) and tetrahydrofuran (thf, 1 mL). The vessel was sealed with a cap (phenolic open top cap with red PTFE/white silicone septum) and the solution was allowed to stir at 22 °C for one hour. Bis(pinacolato)diboron (60.9 mg, 0.24 mmol, 1.2 equiv) was added to the solution, causing it to turn dark brown immediately. The vial was re-sealed with a cap (phenolic open top cap with red PTFE/white silicone septum). The mixture was allowed to stir at 22 °C for 20 min under an atmosphere of  $N_2$ . Alkene **1a** (31.6 mg, 0.20 mmol, 1.0 equiv) and MeOH (25.6 mg, 0.80 mmol, 4.0 equiv) were added. The resulting solution was allowed to stir at 22 °C for 16 h before the reaction was quenched by passing the mixture through a short plug of celite and silica gel and eluted with Et<sub>2</sub>O (3 × 2 mL). The filtrate was concentrated in vacuo to provide yellow oil. The crude was purified by silica gel chromatography (petroleum ether : ethyl acetate = 80:1) to afford **16** as colorless oil (56.3 mg, 0.19 mmol, 98% yield).

**(S)-2-(2-(benzofuran-2-yl)propyl)-4,4,5,5-tetramethyl-1,3,2-dioxaborolane (16).** Yield: (56.3 mg, 98%); **IR (neat):** 2977 (m), 2922 (m), 2851 (w), 1633 (w), 1455 (m), 1371 (s), 1324 (m), 1256 (m), 1144 (s), 968 (w), 847 (w), 797 (w), 750 (m)  $\text{cm}^{-1}$ ;  **$^1\text{H NMR}$  (400 MHz,  $\text{CDCl}_3$ ):**  $\delta$  7.47 (d,  $J = 7.2$  Hz, 1H), 7.39 (d,  $J = 7.6$  Hz, 1H), 7.21 - 7.13 (m, 2H), 6.36 (s, 1H), 3.26 - 3.18



(m, 1H), 1.37 (d,  $J = 6.8$  Hz, 3H), 1.33 (dd,  $J = 15.2, 6.4$  Hz, 1H), 1.24 (s, 12H), 1.12 (dd,  $J = 15.2, 8.0$  Hz, 1H);  $^{13}\text{C}$  NMR (100 MHz,  $\text{CDCl}_3$ ):  $\delta$  165.2, 154.5, 128.9, 122.9, 122.2, 120.2, 110.7, 99.8, 83.2, 29.6, 24.8, 24.7, 21.3; HRMS ( $\text{EI}^+$ ) [ $\text{M}$ ] $^+$  Calcd for  $\text{C}_{17}\text{H}_{23}\text{O}_3\text{B}$ : 285.1777 m/z, Found: 285.1782 m/z; Specific rotation:  $[\alpha]_{\text{D}}^{20}$  12.8 ( $c$  0.50,  $\text{CHCl}_3$ ) for an enantiomerically enriched sample of 98:2 e.r.

**(S)-2-(Benzofuran-2-yl)propan-1-ol (16-oxi)**. Yield: (52.1 mg, 93%); IR (neat): 3344 (br), 2969 (w), 2878 (w), 1585 (w), 1454 (s), 1253 (s), 1168 (m), 1043 (s), 1025 (s), 938 (m), 882 (w), 801 (m), 742 (s)  $\text{cm}^{-1}$ ;  $^1\text{H}$  NMR (400 MHz,  $\text{CDCl}_3$ ):  $\delta$  7.51 (d,  $J = 7.6$  Hz, 1H), 7.43 (d,  $J = 8.0$  Hz, 1H), 7.26 - 7.18 (m, 2H), 6.50 (s, 1H), 3.90 - 3.81 (m, 2H), 3.23 - 3.15 (m, 1H), 1.62 (s, 1H), 1.38 (d,  $J = 6.8$  Hz, 3H);  $^{13}\text{C}$  NMR (100 MHz,  $\text{CDCl}_3$ ):  $\delta$  160.4, 154.6, 128.4, 123.5, 122.5, 120.4, 110.8, 102.3, 66.1, 36.5, 15.0; HRMS ( $\text{EI}^+$ ) [ $\text{M}$ ] $^+$  Calcd for  $\text{C}_{11}\text{H}_{12}\text{O}_2$ : 176.0837 m/z, Found: 176.0842 m/z. Specific rotation:  $[\alpha]_{\text{D}}^{20}$  18.9 ( $c$  1.00,  $\text{CHCl}_3$ ) for an enantiomerically enriched sample of 98:2 e.r.

Enantiomeric purity of **16-oxi** was determined by HPLC analysis in comparison with authentic racemic material (98:2 e.r. shown; Chiralcel AS-H column, 97:3 hexanes/ *i*PrOH, 0.8 mL/min, 220 nm).

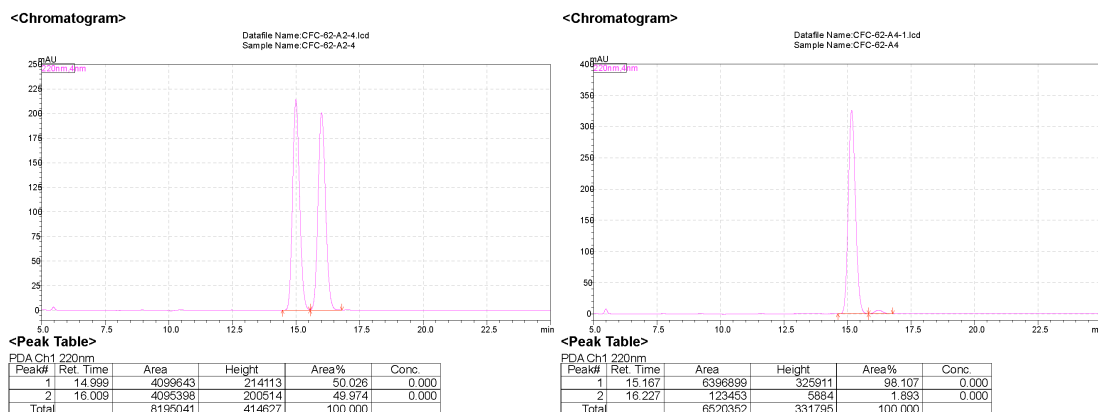

| Peak # | Time (min) | Area (%) | Peak # | Time (min) | Area (%) |
|--------|------------|----------|--------|------------|----------|
| 1      | 14.999     | 50.026   | 1      | 15.167     | 98.107   |
| 2      | 16.009     | 49.974   | 2      | 16.227     | 1.893    |

■ **Representative Experimental Procedure for Phosphine–Cu-Catalyzed Reactions of  $\text{B}_2(\text{pin})_2$ , 1,1-Disubstituted Alkene and Cyanation reagent:** In a  $\text{N}_2$ -filled glove-box, an oven-dried vial (4 mL, 17 × 38 mm) with a magnetic stir bar was charged with (*R,R*)-Ph-BPE (10.1 mg, 0.02 mmol, 10 mol %), CuCl (2.0 mg, 0.02 mmol, 10 mol%), LiOt-Bu (24.0 mg, 0.3 mmol, 1.5 equiv), 4Å molecular sieve (200 mg) and tetrahydrofuran (thf, 1 mL). The vessel was sealed with a cap (phenolic open top cap with red PTFE/white silicone septum) and the solution was allowed to stir at 22 °C for one hour. Bis(pinacolato)diboron (76.2

mg, 0.30 mmol, 1.5 equiv) was added to the solution, causing it to turn dark brown immediately. The vial was re-sealed with a cap (phenolic open top cap with red PTFE/white silicone septum). The mixture was allowed to stir at 22 °C for 30 min under an atmosphere of N<sub>2</sub>. Alkene **1a** (47.5 mg, 0.30 mmol, 1.5 equiv) and **17** (54.4 mg, 0.20 mmol, 1.0 equiv) were added. The resulting solution was allowed to stir at 22 °C for 16 h before the reaction was quenched by passing the mixture through a short plug of celite and silica gel and eluted with Et<sub>2</sub>O (3 × 2 mL). The crude was purified by silica gel chromatography (petroleum ether : ethyl acetate =30:1) to afford **18** as colorless oil (28.0 mg, 0.09 mmol, 45 % yield).

**2-(Benzofuran-2-yl)-2-methyl-3-(4,4,5,5-tetramethyl-1,3,2-dioxaborolan-2-yl)propanenitrile (18)**. Yield: (28.0 mg, 45%); IR (neat): 2979 (m), 2159 (w), 1581 (w), 1454 (m), 1366 (s), 1339 (m), 1259 (s), 1141 (s) cm<sup>-1</sup>; <sup>1</sup>H NMR (400 MHz, CDCl<sub>3</sub>): δ 7.54 (d, *J* = 7.6 Hz, 1H), 7.46 (d, *J* = 8.2 Hz, 1H), 7.28 (t, *J* = 7.8 Hz, 1H), 7.23 (t, *J* = 7.4 Hz, 1H), 6.69 (s, 1H), 1.90 (s, 3H), 1.75 (d, *J* = 15.6 Hz, 1H), 1.68 (d, *J* = 15.6 Hz, 1H), 1.22 (s, 12H); <sup>13</sup>C NMR (100 MHz, CDCl<sub>3</sub>): δ 156.6, 154.8, 127.7, 124.4, 122.9, 122.2, 121.0, 111.2, 102.5, 83.8, 34.3, 25.9, 24.6, 24.6; HRMS (EI<sup>+</sup>) [M+NH<sub>4</sub>]<sup>+</sup> Calcd for C<sub>18</sub>H<sub>26</sub>BN<sub>2</sub>O<sub>3</sub>: 328.2067 m/z, Found: 328.2076 m/z; Specific rotation: [α]<sub>D</sub><sup>20</sup> 6.8 (*c* 1.00, CHCl<sub>3</sub>) for an enantiomerically enriched sample of 98:2 e.r.

Enantiomeric purity of **18** was determined by HPLC analysis in comparison with authentic racemic material (98:2 e.r. shown; Chiralcel OZ-H column, 99:1 hexanes/ *i*PrOH, 0.8 mL/min, 220 nm).

&lt;Chromatogram&gt;

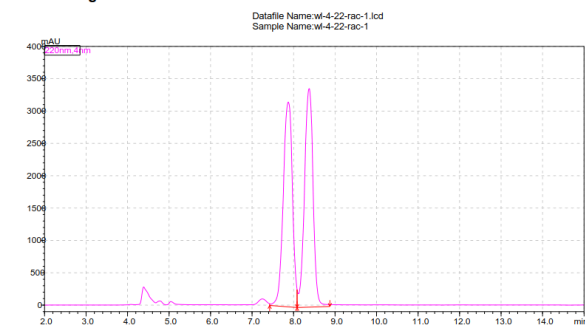

&lt;Peak Table&gt;

| Peak# | Ret. Time | Area     | Height  | Area%   | Conc. |
|-------|-----------|----------|---------|---------|-------|
| 1     | 7.872     | 48779425 | 3166859 | 49.882  | 0.000 |
| 2     | 8.377     | 49010385 | 3378413 | 50.118  | 0.000 |
| Total |           | 97789809 | 6545272 | 100.000 |       |

&lt;Chromatogram&gt;

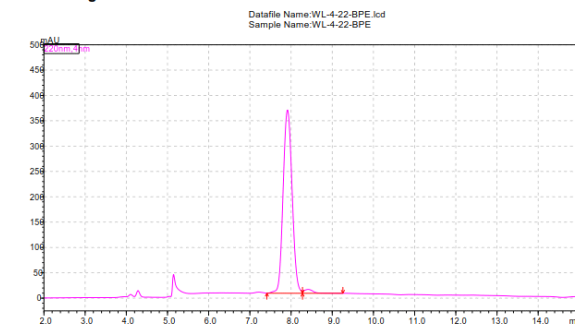

&lt;Peak Table&gt;

| Peak# | Ret. Time | Area    | Height | Area%   | Conc. |
|-------|-----------|---------|--------|---------|-------|
| 1     | 7.913     | 5493446 | 361545 | 97.901  | 0.000 |
| 2     | 8.415     | 117773  | 7640   | 2.099   | 0.000 |
| Total |           | 5611219 | 369185 | 100.000 |       |

| Peak # | Time (min) | Area (%) | Peak # | Time (min) | Area (%) |
|--------|------------|----------|--------|------------|----------|
| 1      | 7.872      | 49.882   | 1      | 7.913      | 97.901   |
| 2      | 8.377      | 50.118   | 2      | 8.415      | 2.099    |

■ **Representative Experimental Procedure for Phosphine–Cu-Catalyzed Reactions of B<sub>2</sub>(pin)<sub>2</sub>, 1,1-Disubstituted Alkene and Benzaldehyde:** In a N<sub>2</sub>-filled glove-box, an oven-dried vial (4 mL, 17 × 38 mm) with a magnetic stir bar was charged with

(*R,R*)-Ph-BPE (10.1 mg, 0.02 mmol, 10 mol %), CuCl (2.0 mg, 0.02 mmol, 10 mol%), LiO*t*-Bu (24.0 mg, 0.3 mmol, 1.5 equiv), 4Å molecular sieve (200 mg) and tetrahydrofuran (thf, 1 mL). The vessel was sealed with a cap (phenolic open top cap with red PTFE/white silicone septum) and the solution was allowed to stir at 22 °C for one hour. Bis(pinacolato)diboron (76.2 mg, 0.30 mmol, 1.5 equiv) was added to the solution, causing it to turn dark brown immediately. The vial was re-sealed with a cap (phenolic open top cap with red PTFE/white silicone septum). The mixture was allowed to stir at 22 °C for 30 min under an atmosphere of N<sub>2</sub>. Alkene **1a** (63.3 mg, 0.40 mmol, 2.0 equiv) and **20** (21.2 mg, 0.20 mmol, 1.0 equiv) were added. The resulting solution was allowed to stir at 22 °C for 16 h before the reaction was quenched by passing the mixture through a short plug of celite and silica gel and eluted with Et<sub>2</sub>O (3 × 2 mL). The crude was purified by silica gel chromatography (petroleum ether : ethyl acetate =15:1) to afford **21a** as colorless oil (22.5 mg, 0.08 mmol, 38 % yield).

**4-(Benzofuran-2-yl)-4-methyl-5-phenyl-1,2-oxaborolan-2-ol (21a).** Yield: (22.5 mg, 38%); IR (neat): 2962 (m), 2925 (w), 2856 (w), 1453 (w), 1425 (w), 1260 (s), 1091 (m), 1019 (s), 873 (w), 799 (s), 750 (w), 701 (m) cm<sup>-1</sup>; <sup>1</sup>H NMR (400 MHz, CDCl<sub>3</sub>): δ 7.36 - 7.30 (m, 1H), 7.28 - 7.22 (m, 1H), 7.18 - 7.09 (m, 2H), 7.09 - 7.02 (m, 3H), 7.02 - 6.94 (m, 2H), 6.11 (s, 1H), 5.32 (s, 1H), 5.16 (s, 1H), 1.73 (d, *J* = 16.4 Hz, 1H), 1.64 (s, 3H), 1.32 (d, *J* = 16.4 Hz, 1H); <sup>13</sup>C NMR (100 MHz, CDCl<sub>3</sub>): δ 161.1, 154.4, 138.4, 128.0, 127.6, 127.5, 125.5, 123.3, 122.2, 120.3, 110.7, 102.6, 89.9, 49.1, 24.7; HRMS (EI<sup>+</sup>) [M+H]<sup>+</sup> Calcd for C<sub>18</sub>H<sub>18</sub>BO<sub>3</sub>: 292.1380 m/z, Found: 292.1378 m/z; Specific rotation: [α]<sub>D</sub><sup>20</sup> 83.7 (*c* 1.00, CHCl<sub>3</sub>) for an enantiomerically enriched sample of 97:3 e.r.

**2-(Benzofuran-2-yl)-2-methyl-1-phenylpropane-1,3-diol (21a-oxi).** Yield: (19.3 mg, 90%); IR (neat): 3356 (br), 3034 (w), 2921 (s), 2867 (m), 1575 (m), 1445 (s), 1356 (m), 1301 (m), 1223 (s), 1189 (m), 1024 (s), 934 (m), 852 (m), 732 (s), 625 (m); <sup>1</sup>H NMR (400 MHz, CDCl<sub>3</sub>): δ 7.53 - 7.45 (m, 2H), 7.31 - 7.19 (m, 5H), 7.16 - 7.10 (m, 2H), 6.47 (s, 1H), 5.12 (s, 1H), 3.88 (d, *J* = 11.2 Hz, 1H), 3.79 (d, *J* = 11.2 Hz, 1H), 2.99 (s, 1H), 2.49 (s, 1H), 1.32 (s, 3H); <sup>13</sup>C NMR (100 MHz, CDCl<sub>3</sub>): δ 159.8, 154.4, 140.0, 128.0, 127.8, 127.7, 127.3, 123.8, 122.8, 120.7, 111.0, 104.8, 78.0, 67.9, 47.1, 17.1; HRMS (EI<sup>+</sup>) [M+NH<sub>4</sub>]<sup>+</sup> Calcd for C<sub>18</sub>H<sub>22</sub>NO<sub>3</sub>: 300.1594 m/z, Found: 300.1596 m/z; Specific rotation: [α]<sub>D</sub><sup>20</sup> 50.7 (*c* 1.00, CHCl<sub>3</sub>) for an enantiomerically enriched sample of 97:3 e.r.

Enantiomeric purity of **21a-oxi** was determined by HPLC analysis in comparison with authentic racemic material (97:3 e.r. shown; Chiralcel IG column, 97:3 hexanes/ *i*PrOH, 0.8 mL/min, 254 nm).

&lt;Chromatogram&gt;

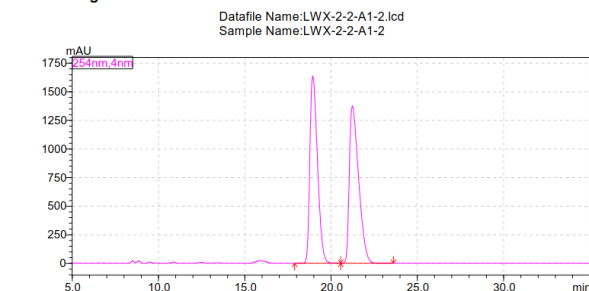

&lt;Peak Table&gt;

| Peak# | Ret. Time | Area      | Height  | Area%   |
|-------|-----------|-----------|---------|---------|
| 1     | 18.941    | 50426005  | 1637465 | 49.435  |
| 2     | 21.239    | 51578042  | 1376194 | 50.565  |
| Total |           | 102004047 | 3013660 | 100.000 |

&lt;Chromatogram&gt;

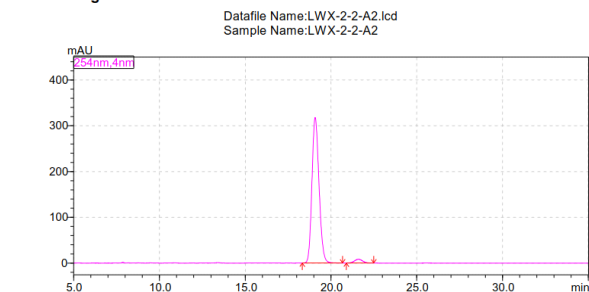

&lt;Peak Table&gt;

| Peak# | Ret. Time | Area    | Height | Area%   |
|-------|-----------|---------|--------|---------|
| 1     | 19.078    | 9114398 | 317654 | 97.118  |
| 2     | 21.603    | 270457  | 8285   | 2.882   |
| Total |           | 9384856 | 325939 | 100.000 |

| Peak # | Time (min) | Area (%) | Peak # | Time (min) | Area (%) |
|--------|------------|----------|--------|------------|----------|
| 1      | 18.941     | 49.435   | 1      | 19.078     | 97.118   |
| 2      | 21.239     | 50.565   | 2      | 21.603     | 2.882    |

■ **Representative Experimental Procedure for Phosphine–Cu-Catalyzed Reactions of B<sub>2</sub>(pin)<sub>2</sub>, 1,1-Disubstituted Alkene and Aldimine:** In a N<sub>2</sub>-filled glove-box, an oven-dried vial (4 mL, 17 × 38 mm) with a magnetic stir bar was charged with (*R,R*)-Ph-BPE (10.1 mg, 0.02 mmol, 10 mol %), CuCl (2.0 mg, 0.02 mmol, 10 mol%), LiOt-Bu (24.0 mg, 0.3 mmol, 1.5 equiv), 4Å molecular sieve (200 mg) and tetrahydrofuran (thf, 1 mL). The vessel was sealed with a cap (phenolic open top cap with red PTFE/white silicone septum) and the solution was allowed to stir at 22 °C for one hour. Bis(pinacolato)diboron (76.2 mg, 0.30 mmol, 1.5 equiv) was added to the solution, causing it to turn dark brown immediately. The vial was resealed with a cap (phenolic open top cap with red PTFE/white silicone septum). The mixture was allowed to stir at 22 °C for 30 min under an atmosphere of N<sub>2</sub>. Alkene **1a** (63.3 mg, 0.40 mmol, 2.0 equiv) and aldimine **22** (54.2 mg, 0.20 mmol, 1.0 equiv) were added. The resulting solution was allowed to stir at 22 °C for 16 h before the reaction was quenched by passing the mixture through a short plug of celite and silica gel and eluted with Et<sub>2</sub>O (3 × 2 mL). The crude was purified by silica gel chromatography (petroleum ether : ethyl acetate =60:1) to afford **23a** as colorless oil (65.8 mg, 0.12 mmol, 59 % yield).

***N*-benzhydryl-2-(benzofuran-2-yl)-2-methyl-1-phenyl-3-(4,4,5,5-tetramethyl-1,3,2-dioxaborolan-2-yl)propan-1-amine (23a).** Yield: (65.8 mg, 59%); IR (neat): 3060 (w), 3026 (w), 2976 (m), 1660 (w), 1491 (w), 1452 (s), 1355 (s), 1322 (m), 1253 (m), 1166 (m), 1108 (s), 1004 (m), 941 (m), 883 (m), 802 (m), 731 (s), 698 (s) cm<sup>-1</sup>; <sup>1</sup>H NMR (400 MHz, CDCl<sub>3</sub>): δ 7.54 (d, *J* = 7.4 Hz, 1H), 7.45 (d, *J* = 7.8 Hz, 1H), 7.32 – 7.24 (m, 9H), 7.22 – 7.15 (m, 6H), 6.98 (d, *J* = 7.0 Hz, 2H), 6.52 (s, 1H), 4.46 (s, 1H), 3.88 (s, 1H), 1.53 (s, 3H), 1.16 (s, 6H), 1.12 (s, 6H); <sup>13</sup>C NMR (100 MHz, CDCl<sub>3</sub>): δ 164.1, 154.3, 144.9, 143.1, 140.0, 130.0, 128.5, 128.1, 128.0, 127.7, 127.5, 127.1, 127.0, 126.7, 126.5, 123.1, 122.2, 120.3, 110.9, 103.0, 82.8, 67.8, 63.3, 42.7,

24.7, 24.4, 24.1; **HRMS (ESI<sup>+</sup>) [M+H]<sup>+</sup>** Calcd for C<sub>37</sub>H<sub>41</sub>BNO<sub>3</sub>: 557.3210 m/z, Found: 557.3206 m/z.

**3-(Benzhydrylamino)-2-(benzofuran-2-yl)-2-methyl-3-phenylpropan-1-ol (23a-oxi).** **IR (neat):** 3344 (br), 3059 (w), 2973 (w), 2925 (w), 1579 (w), 1491 (m), 1451 (s), 1348 (w), 1253 (s), 1167 (m), 1029 (m), 883 (m), 801 (m), 741 (s), 697 (s) cm<sup>-1</sup>; **<sup>1</sup>H NMR (400 MHz, CDCl<sub>3</sub>):** δ 7.50 (d, *J* = 7.2 Hz, 1H), 7.41 (d, *J* = 7.8 Hz, 1H), 7.35 - 7.27 (m, 10H), 7.24 - 7.18 (m, 6H), 6.66 (s, 1H), 4.52 (s, 1H), 4.31 (s, 1H), 4.13 (d, *J* = 11.4 Hz, 1H), 3.91 (s, 1H), 3.87 (d, *J* = 11.4 Hz, 1H), 1.17 (s, 3H); **<sup>13</sup>C NMR (100 MHz, CDCl<sub>3</sub>):** δ 160.8, 154.3, 143.3, 141.4, 137.7, 128.7, 128.5, 128.2, 128.1, 127.8, 127.6, 127.4, 126.8, 123.7, 122.6, 120.8, 110.9, 104.0, 68.8, 66.9, 63.6, 45.3, 18.6; **HRMS (ESI<sup>+</sup>) [M+H]<sup>+</sup>** Calcd for C<sub>31</sub>H<sub>30</sub>NO<sub>2</sub>: 448.2271 m/z, Found: 448.2263 m/z.

Enantiomeric purity of **23a-oxi** was determined by SFC analysis in comparison with authentic racemic material (62:38 d.r., 97.5:2.5 e.r. shown for both diastereomers; Chiralcel AD-H column, 80:20 CO<sub>2</sub>/ *i*PrOH, 1.3 mL/min, 230 nm).

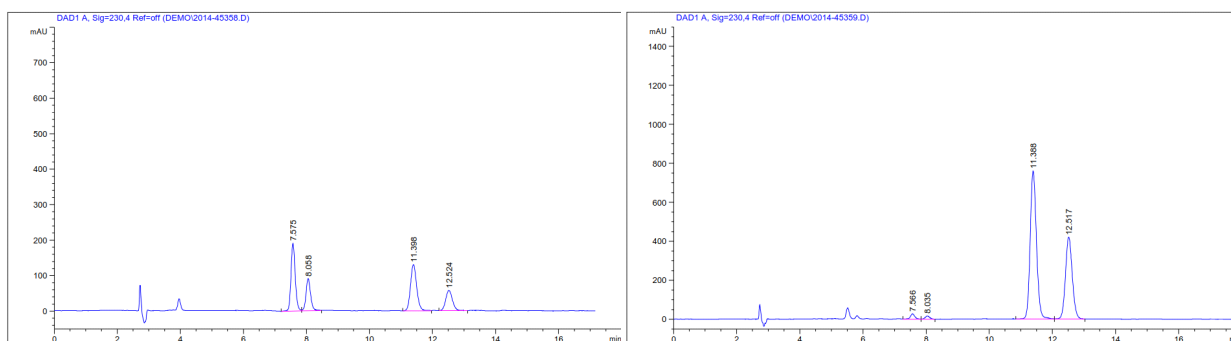

Signal 1: DAD1 A, Sig=230,4 Ref=off

| Peak # | RetTime [min] | Type | Width [min] | Area [mAU*s] | Height [mAU] | Area %  |
|--------|---------------|------|-------------|--------------|--------------|---------|
| 1      | 7.575         | BV   | 0.1436      | 1793.20618   | 190.88422    | 33.4471 |
| 2      | 8.058         | VV   | 0.1579      | 933.63306    | 90.83450     | 17.4143 |
| 3      | 11.398        | BV   | 0.2141      | 1786.41846   | 130.19733    | 33.3205 |
| 4      | 12.524        | BB   | 0.2251      | 848.05688    | 57.14259     | 15.8181 |

Signal 1: DAD1 A, Sig=230,4 Ref=off

| Peak # | RetTime [min] | Type | Width [min] | Area [mAU*s] | Height [mAU] | Area %  |
|--------|---------------|------|-------------|--------------|--------------|---------|
| 1      | 7.566         | VV   | 0.1514      | 274.99893    | 27.33329     | 1.6026  |
| 2      | 8.035         | VB   | 0.1550      | 164.30467    | 16.11070     | 0.9575  |
| 3      | 11.388        | VB   | 0.2124      | 1.04465e4    | 759.59180    | 60.8790 |
| 4      | 12.517        | BV   | 0.2301      | 6273.62207   | 420.33893    | 36.5609 |

| Peak # | Time (min) | Area (%) | Peak # | Time (min) | Area (%) |
|--------|------------|----------|--------|------------|----------|
| 1      | 7.575      | 33.447   | 1      | 7.566      | 1.603    |
| 2      | 8.058      | 17.414   | 2      | 8.035      | 0.957    |
| 3      | 11.398     | 33.321   | 3      | 11.388     | 60.879   |
| 4      | 12.524     | 15.818   | 4      | 12.517     | 36.561   |

## ■ Additional Data for Ligand Screen

**Table S1. Ligand Screen for Enantioselective Coupling of 1,1-Disubstituted Alkene, Phenol Ester and B<sub>2</sub>(pin),**

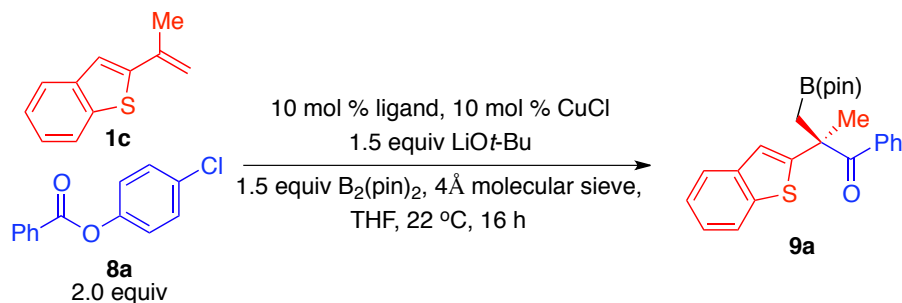

| Entry          | Ligand                | Yield (%) <sup>a</sup> | e.r. <sup>b</sup> |
|----------------|-----------------------|------------------------|-------------------|
| 1              | <b>6d</b>             | 28                     | 33:67             |
| 2              | 6e                    | 32                     | 34:66             |
| 3              | 6f                    | 18                     | 52:48             |
| 4              | 6k                    | 32                     | 75:25             |
| 5              | 6l                    | 75                     | 86:14             |
| 6              | 6m                    | 85                     | 83:17             |
| 7              | 6n                    | 28                     | 88:12             |
| 8              | 6o                    | <5%                    | na                |
| 9 <sup>c</sup> | ( <i>R,R</i> )-Ph-BPE | 15                     | 54:46             |

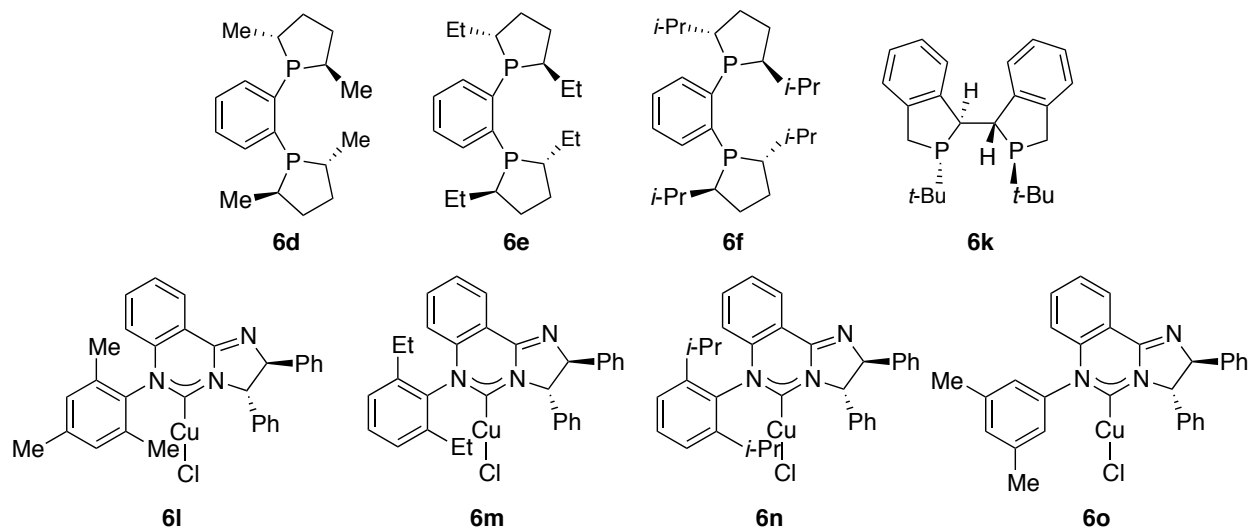

<sup>a</sup>Yields of purified product. <sup>b</sup>Enantiomeric ratios (e.r.) were determined by HPLC analysis. <sup>c</sup>The reaction was conducted at 60 °C for 12 h.

**Scheme S1. Optimization of Electrophiles for Enantioselective Coupling of 1,1-Disubstituted Alkene, Phenol Ester and B<sub>2</sub>(pin),**

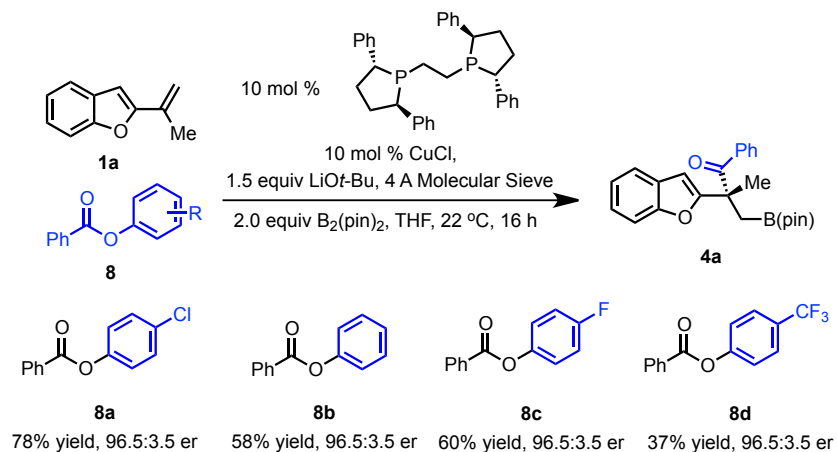

### ■ Proof of Stereochemistry: X-ray Characterization Data

- (R)**-2-(Benzofuran-2-yl)-2-methyl-1-phenyl-3-(4,4,5,5-tetramethyl-1,3,2-dioxaborolan-2-yl)propan-1-one (**4a**) (CCDC number: 1579294)

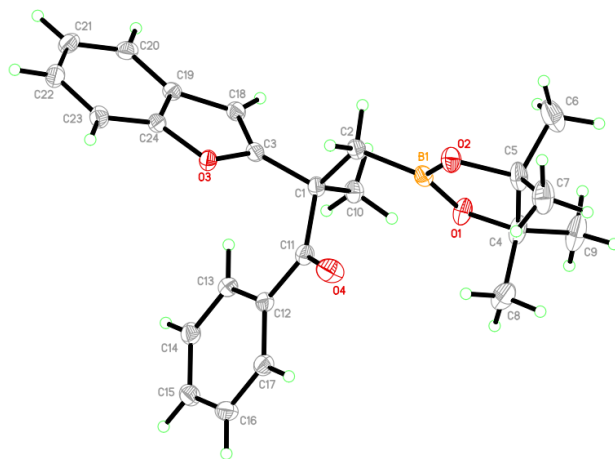

Table S2. Crystal data and structure refinement for A.

|                     |                                                  |
|---------------------|--------------------------------------------------|
| Identification code | A                                                |
| Empirical formula   | C <sub>24</sub> H <sub>27</sub> B O <sub>4</sub> |
| Formula weight      | 390.27                                           |

|                                 |                                                                                                                        |
|---------------------------------|------------------------------------------------------------------------------------------------------------------------|
| Temperature                     | 173(2) K                                                                                                               |
| Wavelength                      | 1.54178 Å                                                                                                              |
| Crystal system, space group     | Monoclinic, P2(1)                                                                                                      |
| Unit cell dimensions            | a = 12.5495(6) Å    alpha = 90 deg.<br>b = 6.3424(3) Å    beta = 92.671(2) deg.<br>c = 13.2506(6) Å    gamma = 90 deg. |
| Volume                          | 1053.52(9) Å <sup>3</sup>                                                                                              |
| Z, Calculated density           | 2, 1.230 Mg/m <sup>3</sup>                                                                                             |
| Absorption coefficient          | 0.652 mm <sup>-1</sup>                                                                                                 |
| F(000)                          | 567                                                                                                                    |
| Crystal size                    | 0.05 x 0.04 x 0.03 mm                                                                                                  |
| Theta range for data collection | 3.339 to 66.732 deg.                                                                                                   |
| Limiting indices                | -14<=h<=14, -7<=k<=7, -15<=l<=15                                                                                       |
| Reflections collected / unique  | 13476 / 3646 [R(int) = 0.0218]                                                                                         |
| Completeness to theta = 66.732  | 99.2 %                                                                                                                 |



|                                   |                                             |
|-----------------------------------|---------------------------------------------|
| Absorption correction             | None                                        |
| Refinement method                 | Full-matrix least-squares on F <sup>2</sup> |
| Data / restraints / parameters    | 3646 / 1 / 267                              |
| Goodness-of-fit on F <sup>2</sup> | 1.057                                       |
| Final R indices [I>2sigma(I)]     | R1 = 0.0260, wR2 = 0.0676                   |
| R indices (all data)              | R1 = 0.0267, wR2 = 0.0682                   |
| Absolute structure parameter      | 0.06(5)                                     |
| Extinction coefficient            | n/a                                         |
| Largest diff. peak and hole       | 0.122 and -0.136 e.Å <sup>-3</sup>          |

Table S3. Atomic coordinates ( $\times 10^4$ ) and equivalent isotropic displacement parameters ( $\text{\AA}^2 \times 10^3$ ) for A.

U(eq) is defined as one third of the trace of the orthogonalized Uij tensor.

|       | x       | y       | z        | U(eq) |
|-------|---------|---------|----------|-------|
| B(1)  | 2193(2) | 3931(3) | 9132(1)  | 31(1) |
| C(1)  | 2704(1) | 6288(3) | 7550(1)  | 28(1) |
| C(2)  | 1859(1) | 4981(3) | 8090(1)  | 31(1) |
| C(3)  | 2208(1) | 7140(3) | 6583(1)  | 27(1) |
| C(4)  | 3052(2) | 3158(3) | 10636(1) | 42(1) |
| C(5)  | 1948(2) | 2056(3) | 10562(1) | 43(1) |
| C(6)  | 1089(2) | 3247(5) | 11106(2) | 65(1) |
| C(7)  | 1951(2) | -257(4) | 10861(2) | 57(1) |
| C(8)  | 3975(2) | 1710(4) | 10392(2) | 53(1) |
| C(9)  | 3315(2) | 4351(4) | 11614(2) | 64(1) |
| C(10) | 3092(2) | 8131(3) | 8226(1)  | 33(1) |
| C(11) | 3661(1) | 4848(3) | 7349(1)  | 30(1) |
| C(12) | 4594(1) | 5630(3) | 6786(1)  | 28(1) |
| C(13) | 4617(1) | 7561(3) | 6278(1)  | 31(1) |
| C(14) | 5502(1) | 8127(3) | 5747(1)  | 35(1) |
| C(15) | 6367(1) | 6792(3) | 5719(1)  | 39(1) |
| C(16) | 6363(1) | 4892(3) | 6231(1)  | 39(1) |

|       |         |          |         |       |
|-------|---------|----------|---------|-------|
| C(17) | 5485(1) | 4308(3)  | 6760(1) | 35(1) |
| C(18) | 1783(1) | 9022(3)  | 6334(1) | 29(1) |
| C(19) | 1385(1) | 8874(3)  | 5299(1) | 28(1) |
| C(20) | 869(1)  | 10250(3) | 4612(1) | 34(1) |
| C(21) | 605(1)  | 9507(3)  | 3654(1) | 38(1) |
| C(22) | 844(2)  | 7433(3)  | 3367(1) | 39(1) |
| C(23) | 1362(1) | 6047(3)  | 4038(1) | 34(1) |
| C(24) | 1611(1) | 6821(3)  | 4994(1) | 28(1) |
| O(1)  | 2948(1) | 4691(2)  | 9814(1) | 39(1) |
| O(2)  | 1655(1) | 2224(2)  | 9481(1) | 39(1) |
| O(3)  | 2113(1) | 5725(2)  | 5781(1) | 28(1) |
| O(4)  | 3671(1) | 3064(2)  | 7683(1) | 47(1) |

---

Table S4. Selected bond lengths [Å] and angles [deg] for A.

---

Symmetry transformations used to generate equivalent atoms:

Table S5. Bond lengths [Å] and angles [deg] for A.

---

|           |          |
|-----------|----------|
| B(1)-O(1) | 1.365(2) |
| B(1)-O(2) | 1.368(2) |
| B(1)-C(2) | 1.573(2) |

|              |          |
|--------------|----------|
| C(1)-C(3)    | 1.499(2) |
| C(1)-C(10)   | 1.537(2) |
| C(1)-C(11)   | 1.541(2) |
| C(1)-C(2)    | 1.548(2) |
| C(2)-H(2A)   | 0.9900   |
| C(2)-H(2B)   | 0.9900   |
| C(3)-C(18)   | 1.343(2) |
| C(3)-O(3)    | 1.391(2) |
| C(4)-O(1)    | 1.462(2) |
| C(4)-C(9)    | 1.523(3) |
| C(4)-C(8)    | 1.524(3) |
| C(4)-C(5)    | 1.551(3) |
| C(5)-O(2)    | 1.466(2) |
| C(5)-C(7)    | 1.520(3) |
| C(5)-C(6)    | 1.525(3) |
| C(6)-H(6A)   | 0.9800   |
| C(6)-H(6B)   | 0.9800   |
| C(6)-H(6C)   | 0.9800   |
| C(7)-H(7A)   | 0.9800   |
| C(7)-H(7B)   | 0.9800   |
| C(7)-H(7C)   | 0.9800   |
| C(8)-H(8A)   | 0.9800   |
| C(8)-H(8B)   | 0.9800   |
| C(8)-H(8C)   | 0.9800   |
| C(9)-H(9A)   | 0.9800   |
| C(9)-H(9B)   | 0.9800   |
| C(9)-H(9C)   | 0.9800   |
| C(10)-H(10A) | 0.9800   |

|              |            |
|--------------|------------|
| C(10)-H(10B) | 0.9800     |
| C(10)-H(10C) | 0.9800     |
| C(11)-O(4)   | 1.215(2)   |
| C(11)-C(12)  | 1.502(2)   |
| C(12)-C(13)  | 1.398(2)   |
| C(12)-C(17)  | 1.399(2)   |
| C(13)-C(14)  | 1.389(2)   |
| C(13)-H(13)  | 0.9500     |
| C(14)-C(15)  | 1.378(3)   |
| C(14)-H(14)  | 0.9500     |
| C(15)-C(16)  | 1.384(3)   |
| C(15)-H(15)  | 0.9500     |
| C(16)-C(17)  | 1.384(3)   |
| C(16)-H(16)  | 0.9500     |
| C(17)-H(17)  | 0.9500     |
| C(18)-C(19)  | 1.441(2)   |
| C(18)-H(18)  | 0.9500     |
| C(19)-C(24)  | 1.397(3)   |
| C(19)-C(20)  | 1.398(2)   |
| C(20)-C(21)  | 1.380(3)   |
| C(20)-H(20)  | 0.9500     |
| C(21)-C(22)  | 1.405(3)   |
| C(21)-H(21)  | 0.9500     |
| C(22)-C(23)  | 1.390(3)   |
| C(22)-H(22)  | 0.9500     |
| C(23)-C(24)  | 1.381(2)   |
| C(23)-H(23)  | 0.9500     |
| C(24)-O(3)   | 1.3810(19) |

|                  |            |
|------------------|------------|
| O(1)-B(1)-O(2)   | 113.22(15) |
| O(1)-B(1)-C(2)   | 125.42(16) |
| O(2)-B(1)-C(2)   | 121.08(16) |
| C(3)-C(1)-C(10)  | 109.38(14) |
| C(3)-C(1)-C(11)  | 111.19(13) |
| C(10)-C(1)-C(11) | 108.90(13) |
| C(3)-C(1)-C(2)   | 108.76(13) |
| C(10)-C(1)-C(2)  | 110.04(13) |
| C(11)-C(1)-C(2)  | 108.57(13) |
| C(1)-C(2)-B(1)   | 118.19(14) |
| C(1)-C(2)-H(2A)  | 107.8      |
| B(1)-C(2)-H(2A)  | 107.8      |
| C(1)-C(2)-H(2B)  | 107.8      |
| B(1)-C(2)-H(2B)  | 107.8      |
| H(2A)-C(2)-H(2B) | 107.1      |
| C(18)-C(3)-O(3)  | 111.52(14) |
| C(18)-C(3)-C(1)  | 132.45(16) |
| O(3)-C(3)-C(1)   | 115.96(14) |
| O(1)-C(4)-C(9)   | 108.18(17) |
| O(1)-C(4)-C(8)   | 106.58(16) |
| C(9)-C(4)-C(8)   | 110.11(18) |
| O(1)-C(4)-C(5)   | 101.71(15) |
| C(9)-C(4)-C(5)   | 115.76(19) |
| C(8)-C(4)-C(5)   | 113.62(18) |
| O(2)-C(5)-C(7)   | 108.84(17) |
| O(2)-C(5)-C(6)   | 106.02(17) |
| C(7)-C(5)-C(6)   | 110.3(2)   |

|                   |            |
|-------------------|------------|
| O(2)-C(5)-C(4)    | 102.24(14) |
| C(7)-C(5)-C(4)    | 115.3(2)   |
| C(6)-C(5)-C(4)    | 113.3(2)   |
| C(5)-C(6)-H(6A)   | 109.5      |
| C(5)-C(6)-H(6B)   | 109.5      |
| H(6A)-C(6)-H(6B)  | 109.5      |
| C(5)-C(6)-H(6C)   | 109.5      |
| H(6A)-C(6)-H(6C)  | 109.5      |
| H(6B)-C(6)-H(6C)  | 109.5      |
| C(5)-C(7)-H(7A)   | 109.5      |
| C(5)-C(7)-H(7B)   | 109.5      |
| H(7A)-C(7)-H(7B)  | 109.5      |
| C(5)-C(7)-H(7C)   | 109.5      |
| H(7A)-C(7)-H(7C)  | 109.5      |
| H(7B)-C(7)-H(7C)  | 109.5      |
| C(4)-C(8)-H(8A)   | 109.5      |
| C(4)-C(8)-H(8B)   | 109.5      |
| H(8A)-C(8)-H(8B)  | 109.5      |
| C(4)-C(8)-H(8C)   | 109.5      |
| H(8A)-C(8)-H(8C)  | 109.5      |
| H(8B)-C(8)-H(8C)  | 109.5      |
| C(4)-C(9)-H(9A)   | 109.5      |
| C(4)-C(9)-H(9B)   | 109.5      |
| H(9A)-C(9)-H(9B)  | 109.5      |
| C(4)-C(9)-H(9C)   | 109.5      |
| H(9A)-C(9)-H(9C)  | 109.5      |
| H(9B)-C(9)-H(9C)  | 109.5      |
| C(1)-C(10)-H(10A) | 109.5      |

|                     |            |
|---------------------|------------|
| C(1)-C(10)-H(10B)   | 109.5      |
| H(10A)-C(10)-H(10B) | 109.5      |
| C(1)-C(10)-H(10C)   | 109.5      |
| H(10A)-C(10)-H(10C) | 109.5      |
| H(10B)-C(10)-H(10C) | 109.5      |
| O(4)-C(11)-C(12)    | 119.55(16) |
| O(4)-C(11)-C(1)     | 118.96(15) |
| C(12)-C(11)-C(1)    | 121.44(14) |
| C(13)-C(12)-C(17)   | 118.59(15) |
| C(13)-C(12)-C(11)   | 124.24(15) |
| C(17)-C(12)-C(11)   | 117.16(16) |
| C(14)-C(13)-C(12)   | 120.37(16) |
| C(14)-C(13)-H(13)   | 119.8      |
| C(12)-C(13)-H(13)   | 119.8      |
| C(15)-C(14)-C(13)   | 120.25(18) |
| C(15)-C(14)-H(14)   | 119.9      |
| C(13)-C(14)-H(14)   | 119.9      |
| C(14)-C(15)-C(16)   | 120.07(17) |
| C(14)-C(15)-H(15)   | 120.0      |
| C(16)-C(15)-H(15)   | 120.0      |
| C(17)-C(16)-C(15)   | 120.18(17) |
| C(17)-C(16)-H(16)   | 119.9      |
| C(15)-C(16)-H(16)   | 119.9      |
| C(16)-C(17)-C(12)   | 120.53(17) |
| C(16)-C(17)-H(17)   | 119.7      |
| C(12)-C(17)-H(17)   | 119.7      |
| C(3)-C(18)-C(19)    | 106.98(15) |
| C(3)-C(18)-H(18)    | 126.5      |



|                   |            |
|-------------------|------------|
| C(19)-C(18)-H(18) | 126.5      |
| C(24)-C(19)-C(20) | 119.21(16) |
| C(24)-C(19)-C(18) | 105.70(14) |
| C(20)-C(19)-C(18) | 135.10(17) |
| C(21)-C(20)-C(19) | 117.99(18) |
| C(21)-C(20)-H(20) | 121.0      |
| C(19)-C(20)-H(20) | 121.0      |
| C(20)-C(21)-C(22) | 121.61(17) |
| C(20)-C(21)-H(21) | 119.2      |
| C(22)-C(21)-H(21) | 119.2      |
| C(23)-C(22)-C(21) | 121.20(17) |
| C(23)-C(22)-H(22) | 119.4      |
| C(21)-C(22)-H(22) | 119.4      |
| C(24)-C(23)-C(22) | 116.18(18) |
| C(24)-C(23)-H(23) | 121.9      |
| C(22)-C(23)-H(23) | 121.9      |
| C(23)-C(24)-O(3)  | 126.19(17) |
| C(23)-C(24)-C(19) | 123.82(16) |
| O(3)-C(24)-C(19)  | 109.99(14) |
| B(1)-O(1)-C(4)    | 107.08(15) |
| B(1)-O(2)-C(5)    | 106.40(14) |
| C(24)-O(3)-C(3)   | 105.81(13) |

---

Symmetry transformations used to generate equivalent atoms:

Table S6. Anisotropic displacement parameters ( $\text{Å}^2 \times 10^3$ ) for A.

The anisotropic displacement factor exponent takes the form:

$$-2 \pi^2 [ h^2 a^2 U_{11} + \dots + 2 h k a^* b^* U_{12} ]$$

---

|       | U11    | U22   | U33   | U23   | U13    | U12   |
|-------|--------|-------|-------|-------|--------|-------|
| B(1)  | 35(1)  | 31(1) | 28(1) | -1(1) | 6(1)   | 2(1)  |
| C(1)  | 31(1)  | 29(1) | 23(1) | 1(1)  | 2(1)   | 1(1)  |
| C(2)  | 31(1)  | 35(1) | 26(1) | 0(1)  | 3(1)   | -1(1) |
| C(3)  | 27(1)  | 29(1) | 25(1) | -1(1) | 4(1)   | -1(1) |
| C(4)  | 68(1)  | 32(1) | 25(1) | 5(1)  | -6(1)  | 2(1)  |
| C(5)  | 69(1)  | 36(1) | 25(1) | 6(1)  | 10(1)  | 2(1)  |
| C(6)  | 88(2)  | 60(2) | 49(1) | 10(1) | 32(1)  | 10(1) |
| C(7)  | 93(2)  | 38(1) | 39(1) | 10(1) | 5(1)   | -5(1) |
| C(8)  | 61(1)  | 52(1) | 45(1) | 1(1)  | -13(1) | 7(1)  |
| C(9)  | 113(2) | 44(1) | 31(1) | 0(1)  | -16(1) | 4(1)  |
| C(10) | 40(1)  | 30(1) | 29(1) | -2(1) | 2(1)   | -2(1) |
| C(11) | 34(1)  | 28(1) | 27(1) | 2(1)  | 0(1)   | 1(1)  |
| C(12) | 30(1)  | 31(1) | 25(1) | -2(1) | 0(1)   | 3(1)  |
| C(13) | 30(1)  | 34(1) | 30(1) | 3(1)  | 1(1)   | 3(1)  |
| C(14) | 34(1)  | 41(1) | 30(1) | 4(1)  | 2(1)   | -4(1) |
| C(15) | 32(1)  | 52(1) | 33(1) | -4(1) | 4(1)   | -4(1) |
| C(16) | 31(1)  | 47(1) | 40(1) | -6(1) | 1(1)   | 7(1)  |
| C(17) | 38(1)  | 35(1) | 31(1) | 0(1)  | -1(1)  | 6(1)  |
| C(18) | 30(1)  | 29(1) | 28(1) | 0(1)  | 4(1)   | 3(1)  |
| C(19) | 23(1)  | 33(1) | 28(1) | 5(1)  | 4(1)   | -1(1) |
| C(20) | 25(1)  | 37(1) | 40(1) | 10(1) | 5(1)   | 2(1)  |

---

|       |       |       |       |       |       |       |
|-------|-------|-------|-------|-------|-------|-------|
| C(21) | 28(1) | 51(1) | 36(1) | 17(1) | -3(1) | -1(1) |
| C(22) | 35(1) | 52(1) | 29(1) | 5(1)  | -1(1) | -7(1) |
| C(23) | 34(1) | 39(1) | 28(1) | 1(1)  | 3(1)  | -5(1) |
| C(24) | 25(1) | 34(1) | 26(1) | 5(1)  | 3(1)  | -2(1) |
| O(1)  | 54(1) | 35(1) | 28(1) | 5(1)  | -6(1) | -4(1) |
| O(2)  | 46(1) | 39(1) | 32(1) | 6(1)  | 4(1)  | -5(1) |
| O(3)  | 34(1) | 27(1) | 23(1) | 1(1)  | 1(1)  | 2(1)  |
| O(4)  | 50(1) | 30(1) | 63(1) | 16(1) | 16(1) | 9(1)  |

Table S7. Hydrogen coordinates ( $\times 10^4$ ) and isotropic displacement parameters ( $\text{Å}^2 \times 10^3$ ) for A.

|       | x    | y     | z     | U(eq) |
|-------|------|-------|-------|-------|
| H(2A) | 1609 | 3847  | 7623  | 37    |
| H(2B) | 1241 | 5912  | 8197  | 37    |
| H(6A) | 1110 | 4742  | 10921 | 97    |
| H(6B) | 1219 | 3102  | 11838 | 97    |
| H(6C) | 387  | 2663  | 10909 | 97    |
| H(7A) | 1224 | -818  | 10788 | 85    |
| H(7B) | 2215 | -398  | 11566 | 85    |
| H(7C) | 2416 | -1047 | 10423 | 85    |
| H(8A) | 3798 | 949   | 9763  | 80    |
| H(8B) | 4100 | 698   | 10943 | 80    |

|        |      |       |       |    |
|--------|------|-------|-------|----|
| H(8C)  | 4620 | 2554  | 10313 | 80 |
| H(9A)  | 3996 | 5089  | 11563 | 95 |
| H(9B)  | 3367 | 3354  | 12179 | 95 |
| H(9C)  | 2749 | 5378  | 11729 | 95 |
| H(10A) | 3557 | 9050  | 7847  | 49 |
| H(10B) | 3489 | 7578  | 8823  | 49 |
| H(10C) | 2476 | 8939  | 8439  | 49 |
| H(13)  | 4025 | 8490  | 6296  | 37 |
| H(14)  | 5511 | 9440  | 5402  | 42 |
| H(15)  | 6966 | 7178  | 5346  | 46 |
| H(16)  | 6965 | 3986  | 6220  | 47 |
| H(17)  | 5487 | 2999  | 7108  | 42 |
| H(18)  | 1751 | 10224 | 6759  | 34 |
| H(20)  | 705  | 11655 | 4799  | 41 |
| H(21)  | 254  | 10419 | 3177  | 46 |
| H(22)  | 647  | 6971  | 2702  | 46 |
| H(23)  | 1534 | 4647  | 3849  | 40 |

---

Table S8. Selected torsion angles [deg] for A.

---

**2. (2*S*,3*S*)-2-(benzo[*b*]thiophen-2-yl)-2-methyl-3-phenylbutane-1,3-diol (7b-oxi).** (CCDC number: 1579300)

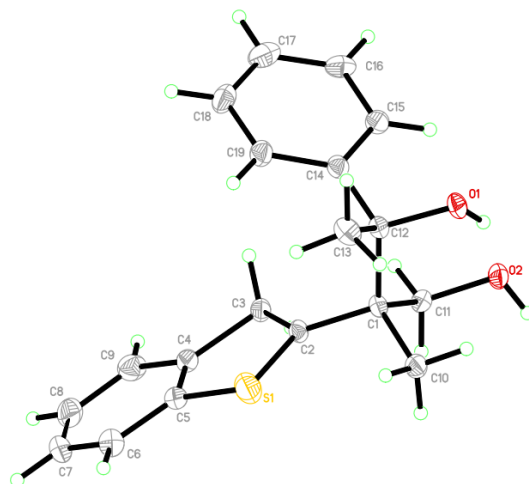

Table S9. Crystal data and structure refinement for a.

|                             |                                                                                                                        |
|-----------------------------|------------------------------------------------------------------------------------------------------------------------|
| Identification code         | a                                                                                                                      |
| Empirical formula           | C <sub>19</sub> H <sub>21</sub> O <sub>2</sub> S                                                                       |
| Formula weight              | 313.42                                                                                                                 |
| Temperature                 | 173(2) K                                                                                                               |
| Wavelength                  | 1.54178 Å                                                                                                              |
| Crystal system, space group | Monoclinic, P2(1)                                                                                                      |
| Unit cell dimensions        | a = 6.6120(6) Å    alpha = 90 deg.<br>b = 7.8997(7) Å    beta = 92.455(3) deg.<br>c = 15.4119(13) Å    gamma = 90 deg. |
| Volume                      | 804.27(12) Å <sup>3</sup>                                                                                              |
| Z, Calculated density       | 2, 1.294 Mg/m <sup>3</sup>                                                                                             |
| Absorption coefficient      | 1.815 mm <sup>-1</sup>                                                                                                 |

|                                   |                                                                |
|-----------------------------------|----------------------------------------------------------------|
| F(000)                            | 608                                                            |
| Crystal size                      | 0.05 x 0.04 x 0.03 mm                                          |
| Theta range for data collection   | 2.870 to 66.577 deg.                                           |
| Limiting indices                  | $-7 \leq h \leq 7$ , $-9 \leq k \leq 9$ , $-18 \leq l \leq 18$ |
| Reflections collected / unique    | 10232 / 2796 [R(int) = 0.0340]                                 |
| Completeness to theta = 66.577    | 99.2 %                                                         |
| Absorption correction             | None                                                           |
| Refinement method                 | Full-matrix least-squares on F <sup>2</sup>                    |
| Data / restraints / parameters    | 2796 / 193 / 203                                               |
| Goodness-of-fit on F <sup>2</sup> | 1.044                                                          |
| Final R indices [I > 2σ(I)]       | R1 = 0.0824, wR2 = 0.2256                                      |
| R indices (all data)              | R1 = 0.0840, wR2 = 0.2279                                      |
| Absolute structure parameter      | 0.123(9)                                                       |
| Extinction coefficient            | n/a                                                            |
| Largest diff. peak and hole       | 1.824 and -0.411 e.Å <sup>-3</sup>                             |

Table S10. Atomic coordinates ( $\times 10^4$ ) and equivalent isotropic displacement parameters ( $\text{Å}^2 \times 10^3$ ) for a.

U(eq) is defined as one third of the trace of the orthogonalized U<sub>ij</sub> tensor.

---

|       | x        | y        | z       | U(eq) |
|-------|----------|----------|---------|-------|
| S(1)  | 255(3)   | 2085(3)  | 7258(1) | 50(1) |
| O(1)  | 3499(7)  | 5300(6)  | 9675(3) | 33(1) |
| C(1)  | 3269(10) | 3234(8)  | 8490(4) | 27(1) |
| O(2)  | 6426(7)  | 3204(6)  | 9443(3) | 34(1) |
| C(2)  | 2683(9)  | 2922(8)  | 7534(4) | 25(1) |
| C(3)  | 4302(10) | 3259(9)  | 6766(4) | 30(1) |
| C(5)  | 888(11)  | 1930(9)  | 6185(4) | 34(1) |
| C(4)  | 2813(12) | 2479(8)  | 6019(4) | 34(2) |
| C(6)  | -396(14) | 1237(11) | 5523(6) | 46(2) |
| C(7)  | 341(15)  | 1103(11) | 4708(5) | 50(2) |
| C(9)  | 3500(12) | 2350(10) | 5156(5) | 42(2) |
| C(8)  | 2224(15) | 1642(11) | 4524(5) | 51(2) |
| C(10) | 2234(10) | 1936(10) | 9050(4) | 35(2) |
| C(11) | 5584(10) | 2927(9)  | 8579(4) | 29(1) |
| C(12) | 2726(9)  | 5091(9)  | 8782(4) | 28(1) |
| C(13) | 473(10)  | 5386(11) | 8836(5) | 38(2) |
| C(14) | 3661(10) | 6423(8)  | 8204(4) | 28(1) |
| C(15) | 5581(10) | 7079(10) | 8413(4) | 32(1) |
| C(16) | 6447(12) | 8296(9)  | 7889(5) | 40(2) |
| C(17) | 5399(14) | 8870(10) | 7155(5) | 47(2) |
| C(18) | 3504(13) | 8235(10) | 6933(5) | 42(2) |
| C(19) | 2659(11) | 7033(10) | 7458(4) | 36(2) |

---

Table S11. Selected bond lengths [Å] and angles [deg] for a.

---

Symmetry transformations used to generate equivalent atoms:

Table S12. Bond lengths [Å] and angles [deg] for a.

---

|            |           |
|------------|-----------|
| S(1)-C(5)  | 1.726(7)  |
| S(1)-C(2)  | 1.771(7)  |
| O(1)-C(12) | 1.457(8)  |
| O(1)-H(1)  | 0.8400    |
| C(1)-C(10) | 1.522(9)  |
| C(1)-C(2)  | 1.526(8)  |
| C(1)-C(11) | 1.550(9)  |
| C(1)-C(12) | 1.580(9)  |
| O(2)-C(11) | 1.438(8)  |
| O(2)-H(2)  | 0.8400    |
| C(2)-C(3)  | 1.652(9)  |
| C(3)-C(4)  | 1.605(9)  |
| C(3)-H(3A) | 0.9900    |
| C(3)-H(3B) | 0.9900    |
| C(5)-C(4)  | 1.379(11) |
| C(5)-C(6)  | 1.410(11) |
| C(4)-C(9)  | 1.427(10) |
| C(6)-C(7)  | 1.371(12) |
| C(6)-H(6)  | 0.9500    |
| C(7)-C(8)  | 1.357(13) |
| C(7)-H(7)  | 0.9500    |
| C(9)-C(8)  | 1.380(12) |
| C(9)-H(9)  | 0.9500    |
| C(8)-H(8)  | 0.9500    |



|              |           |
|--------------|-----------|
| C(10)-H(10A) | 0.9800    |
| C(10)-H(10B) | 0.9800    |
| C(10)-H(10C) | 0.9800    |
| C(11)-H(11A) | 0.9900    |
| C(11)-H(11B) | 0.9900    |
| C(12)-C(13)  | 1.514(9)  |
| C(12)-C(14)  | 1.526(9)  |
| C(13)-H(13A) | 0.9800    |
| C(13)-H(13B) | 0.9800    |
| C(13)-H(13C) | 0.9800    |
| C(14)-C(19)  | 1.388(9)  |
| C(14)-C(15)  | 1.396(9)  |
| C(15)-C(16)  | 1.394(10) |
| C(15)-H(15)  | 0.9500    |
| C(16)-C(17)  | 1.378(12) |
| C(16)-H(16)  | 0.9500    |
| C(17)-C(18)  | 1.380(13) |
| C(17)-H(17)  | 0.9500    |
| C(18)-C(19)  | 1.381(11) |
| C(18)-H(18)  | 0.9500    |
| C(19)-H(19)  | 0.9500    |

|                  |          |
|------------------|----------|
| C(5)-S(1)-C(2)   | 90.1(3)  |
| C(12)-O(1)-H(1)  | 109.5    |
| C(10)-C(1)-C(2)  | 109.7(5) |
| C(10)-C(1)-C(11) | 108.1(5) |
| C(2)-C(1)-C(11)  | 105.6(5) |
| C(10)-C(1)-C(12) | 110.5(6) |
| C(2)-C(1)-C(12)  | 111.9(5) |
| C(11)-C(1)-C(12) | 110.8(5) |
| C(11)-O(2)-H(2)  | 109.5    |
| C(1)-C(2)-C(3)   | 121.3(5) |
| C(1)-C(2)-S(1)   | 118.9(4) |
| C(3)-C(2)-S(1)   | 119.7(4) |
| C(4)-C(3)-C(2)   | 93.2(5)  |
| C(4)-C(3)-H(3A)  | 113.1    |

|                     |          |
|---------------------|----------|
| C(2)-C(3)-H(3A)     | 113.1    |
| C(4)-C(3)-H(3B)     | 113.1    |
| C(2)-C(3)-H(3B)     | 113.1    |
| H(3A)-C(3)-H(3B)    | 110.5    |
| C(4)-C(5)-C(6)      | 121.3(7) |
| C(4)-C(5)-S(1)      | 114.8(5) |
| C(6)-C(5)-S(1)      | 123.9(6) |
| C(5)-C(4)-C(9)      | 118.9(7) |
| C(5)-C(4)-C(3)      | 122.0(6) |
| C(9)-C(4)-C(3)      | 119.1(7) |
| C(7)-C(6)-C(5)      | 117.8(8) |
| C(7)-C(6)-H(6)      | 121.1    |
| C(5)-C(6)-H(6)      | 121.1    |
| C(8)-C(7)-C(6)      | 122.2(8) |
| C(8)-C(7)-H(7)      | 118.9    |
| C(6)-C(7)-H(7)      | 118.9    |
| C(8)-C(9)-C(4)      | 118.6(7) |
| C(8)-C(9)-H(9)      | 120.7    |
| C(4)-C(9)-H(9)      | 120.7    |
| C(7)-C(8)-C(9)      | 121.2(7) |
| C(7)-C(8)-H(8)      | 119.4    |
| C(9)-C(8)-H(8)      | 119.4    |
| C(1)-C(10)-H(10A)   | 109.5    |
| C(1)-C(10)-H(10B)   | 109.5    |
| H(10A)-C(10)-H(10B) | 109.5    |
| C(1)-C(10)-H(10C)   | 109.5    |
| H(10A)-C(10)-H(10C) | 109.5    |
| H(10B)-C(10)-H(10C) | 109.5    |
| O(2)-C(11)-C(1)     | 113.6(5) |
| O(2)-C(11)-H(11A)   | 108.8    |
| C(1)-C(11)-H(11A)   | 108.8    |
| O(2)-C(11)-H(11B)   | 108.8    |
| C(1)-C(11)-H(11B)   | 108.8    |
| H(11A)-C(11)-H(11B) | 107.7    |
| O(1)-C(12)-C(13)    | 103.7(5) |
| O(1)-C(12)-C(14)    | 109.8(5) |

|                     |          |
|---------------------|----------|
| C(13)-C(12)-C(14)   | 110.5(6) |
| O(1)-C(12)-C(1)     | 107.4(5) |
| C(13)-C(12)-C(1)    | 113.2(5) |
| C(14)-C(12)-C(1)    | 111.8(5) |
| C(12)-C(13)-H(13A)  | 109.5    |
| C(12)-C(13)-H(13B)  | 109.5    |
| H(13A)-C(13)-H(13B) | 109.5    |
| C(12)-C(13)-H(13C)  | 109.5    |
| H(13A)-C(13)-H(13C) | 109.5    |
| H(13B)-C(13)-H(13C) | 109.5    |
| C(19)-C(14)-C(15)   | 117.3(7) |
| C(19)-C(14)-C(12)   | 122.1(6) |
| C(15)-C(14)-C(12)   | 120.6(6) |
| C(16)-C(15)-C(14)   | 121.0(6) |
| C(16)-C(15)-H(15)   | 119.5    |
| C(14)-C(15)-H(15)   | 119.5    |
| C(17)-C(16)-C(15)   | 119.9(7) |
| C(17)-C(16)-H(16)   | 120.1    |
| C(15)-C(16)-H(16)   | 120.1    |
| C(16)-C(17)-C(18)   | 120.3(7) |
| C(16)-C(17)-H(17)   | 119.9    |
| C(18)-C(17)-H(17)   | 119.9    |
| C(17)-C(18)-C(19)   | 119.3(7) |
| C(17)-C(18)-H(18)   | 120.3    |
| C(19)-C(18)-H(18)   | 120.3    |
| C(18)-C(19)-C(14)   | 122.3(7) |
| C(18)-C(19)-H(19)   | 118.9    |
| C(14)-C(19)-H(19)   | 118.9    |

---

Symmetry transformations used to generate equivalent atoms:

Table S13. Anisotropic displacement parameters ( $\text{\AA}^2 \times 10^3$ ) for a.

The anisotropic displacement factor exponent takes the form:

$$-2 \pi^2 [ h^2 a^{*2} U_{11} + \dots + 2 h k a^* b^* U_{12} ]$$

|       | U11   | U22   | U33   | U23   | U13    | U12    |
|-------|-------|-------|-------|-------|--------|--------|
| S(1)  | 53(1) | 57(1) | 40(1) | -3(1) | -4(1)  | -8(1)  |
| O(1)  | 42(3) | 37(3) | 19(2) | -5(2) | -4(2)  | 0(2)   |
| C(1)  | 31(3) | 29(3) | 21(3) | -1(2) | -4(2)  | -3(3)  |
| O(2)  | 34(2) | 37(3) | 29(2) | 5(2)  | -10(2) | -5(2)  |
| C(2)  | 28(3) | 29(3) | 17(3) | -1(2) | 2(2)   | -1(2)  |
| C(3)  | 37(2) | 28(2) | 24(2) | -2(1) | -4(1)  | 8(1)   |
| C(5)  | 46(3) | 27(3) | 30(3) | 0(3)  | -4(3)  | -1(3)  |
| C(4)  | 48(4) | 26(3) | 28(3) | 0(2)  | -6(3)  | 4(3)   |
| C(6)  | 53(4) | 44(4) | 41(4) | 3(3)  | -8(3)  | -4(3)  |
| C(7)  | 74(5) | 44(5) | 32(4) | 1(3)  | -17(4) | -12(4) |
| C(9)  | 49(4) | 38(4) | 40(4) | 2(3)  | 8(3)   | -3(3)  |
| C(8)  | 85(5) | 43(4) | 25(3) | -1(3) | 3(3)   | 5(4)   |
| C(10) | 41(3) | 37(4) | 27(3) | 6(3)  | -3(3)  | -13(3) |
| C(11) | 32(3) | 27(3) | 27(3) | 4(3)  | -3(2)  | 0(2)   |
| C(12) | 31(3) | 28(3) | 24(3) | -2(2) | -3(2)  | 0(3)   |
| C(13) | 32(3) | 45(4) | 39(4) | -8(3) | 3(3)   | -2(3)  |
| C(14) | 30(3) | 28(3) | 26(3) | -3(2) | -1(2)  | 3(2)   |
| C(15) | 35(3) | 30(3) | 30(3) | -2(3) | 1(2)   | 1(3)   |
| C(16) | 44(4) | 29(4) | 49(4) | -1(3) | 8(3)   | -8(3)  |
| C(17) | 67(5) | 31(4) | 44(4) | 3(3)  | 19(4)  | 3(3)   |
| C(18) | 60(4) | 39(4) | 28(3) | 5(3)  | 4(3)   | 13(3)  |
| C(19) | 39(3) | 35(3) | 33(3) | 0(3)  | -5(3)  | 7(3)   |

Table S14. Hydrogen coordinates ( $\times 10^4$ ) and isotropic displacement parameters ( $\text{\AA}^2 \times 10^3$ ) for a.

|  | x | y | z | U(eq) |
|--|---|---|---|-------|
|--|---|---|---|-------|

|        |       |      |      |    |
|--------|-------|------|------|----|
| H(1)   | 4558  | 4723 | 9754 | 49 |
| H(2)   | 6706  | 2268 | 9677 | 51 |
| H(3A)  | 4597  | 4474 | 6678 | 35 |
| H(3B)  | 5576  | 2610 | 6854 | 35 |
| H(6)   | -1729 | 875  | 5638 | 55 |
| H(7)   | -494  | 616  | 4257 | 61 |
| H(9)   | 4806  | 2743 | 5020 | 51 |
| H(8)   | 2672  | 1529 | 3949 | 61 |
| H(10A) | 2710  | 799  | 8906 | 53 |
| H(10B) | 765   | 1999 | 8939 | 53 |
| H(10C) | 2560  | 2173 | 9664 | 53 |
| H(11A) | 5870  | 1748 | 8405 | 35 |
| H(11B) | 6265  | 3689 | 8174 | 35 |
| H(13A) | -63   | 4648 | 9283 | 58 |
| H(13B) | -205  | 5129 | 8273 | 58 |
| H(13C) | 227   | 6571 | 8987 | 58 |
| H(15)  | 6308  | 6691 | 8920 | 38 |
| H(16)  | 7757  | 8728 | 8038 | 48 |
| H(17)  | 5984  | 9707 | 6801 | 56 |
| H(18)  | 2787  | 8619 | 6423 | 51 |
| H(19)  | 1348  | 6610 | 7304 | 43 |

---

Table S15. Selected torsion angles [deg] for a.

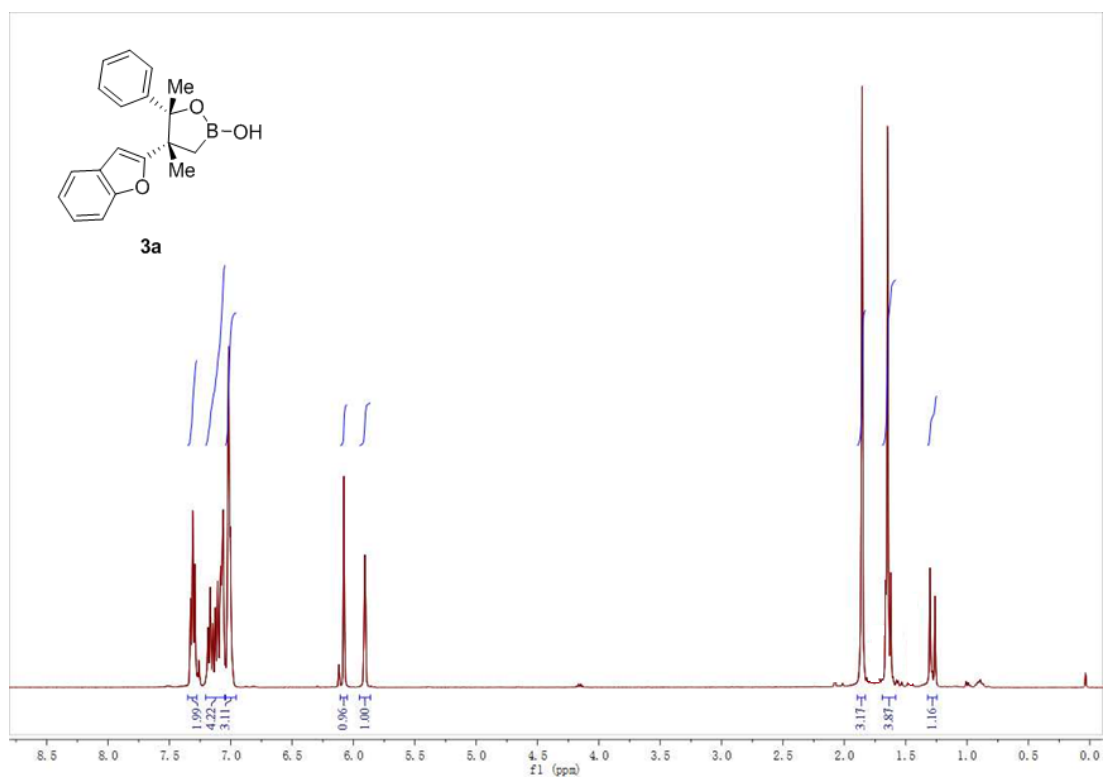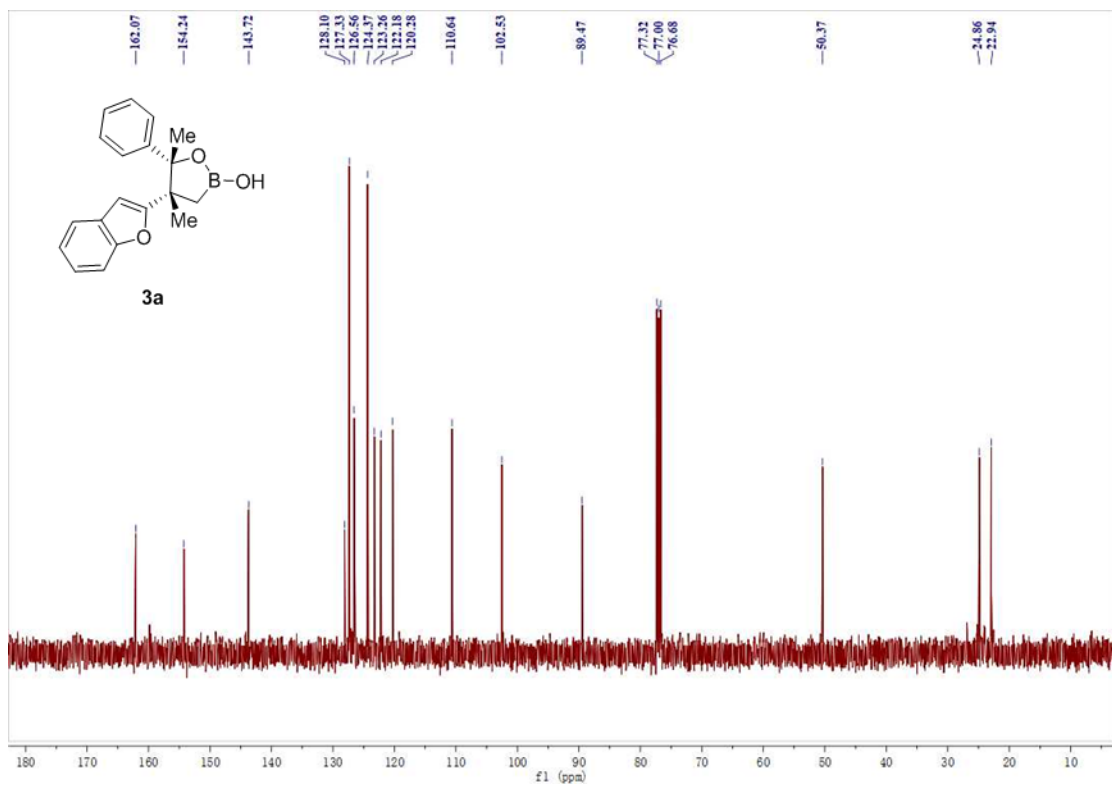

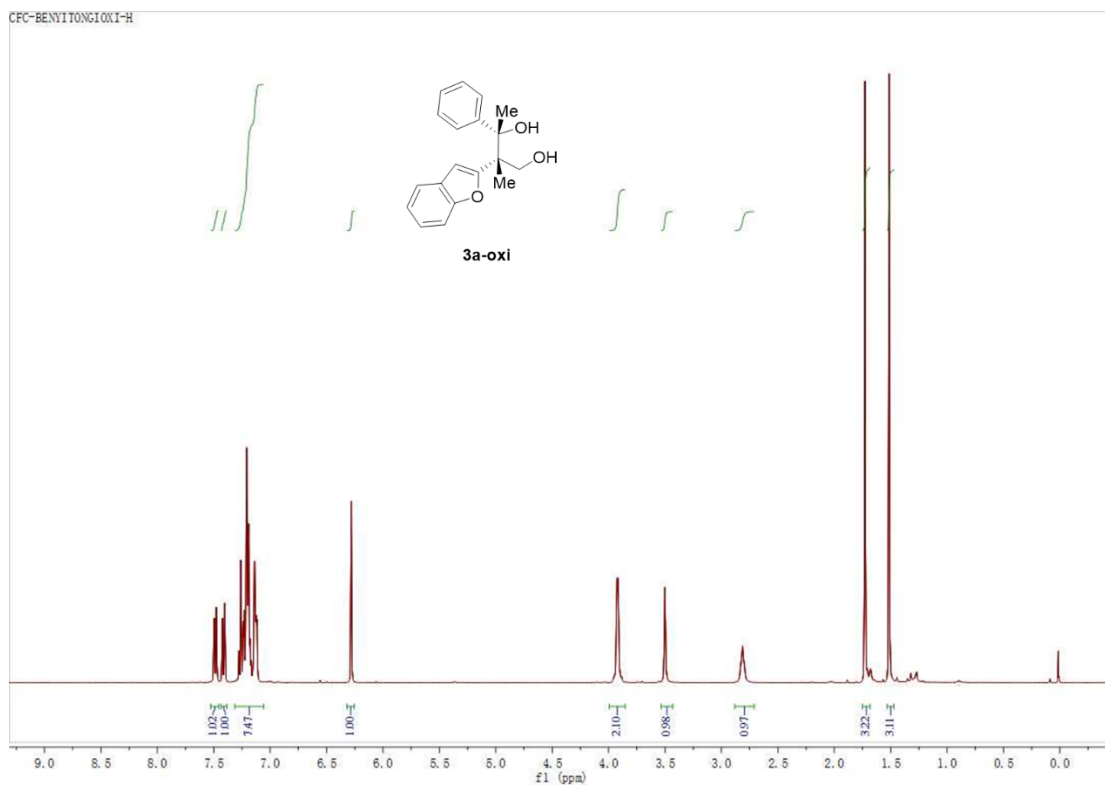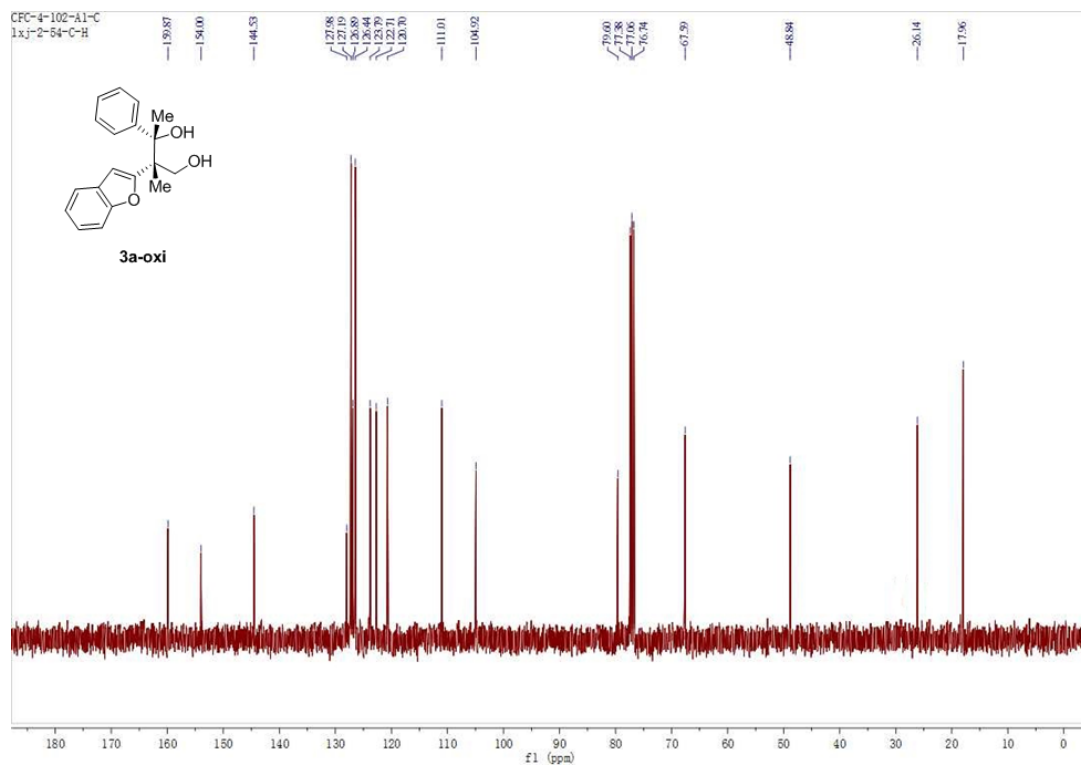

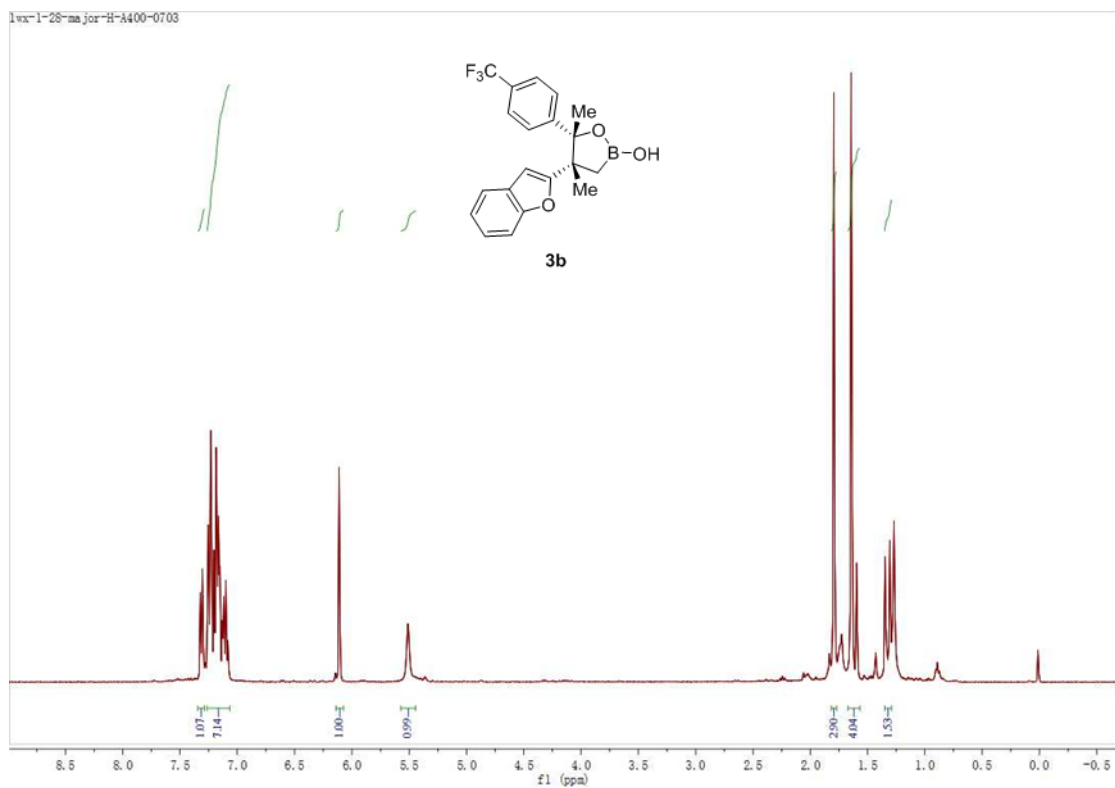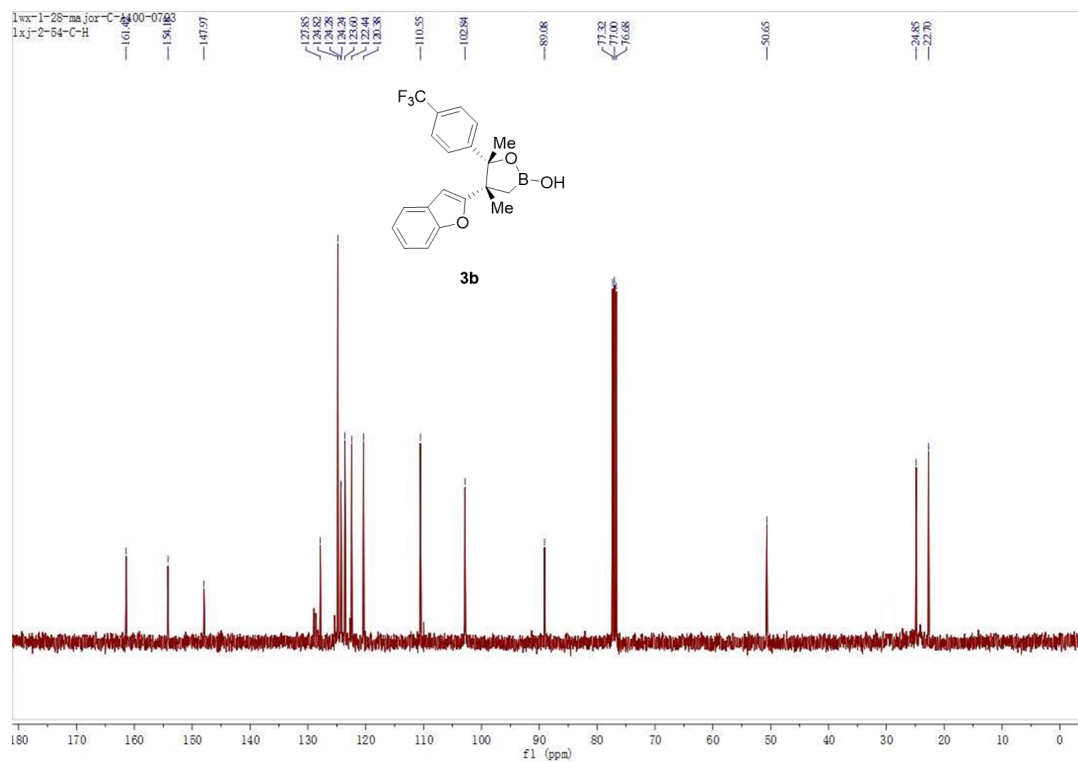



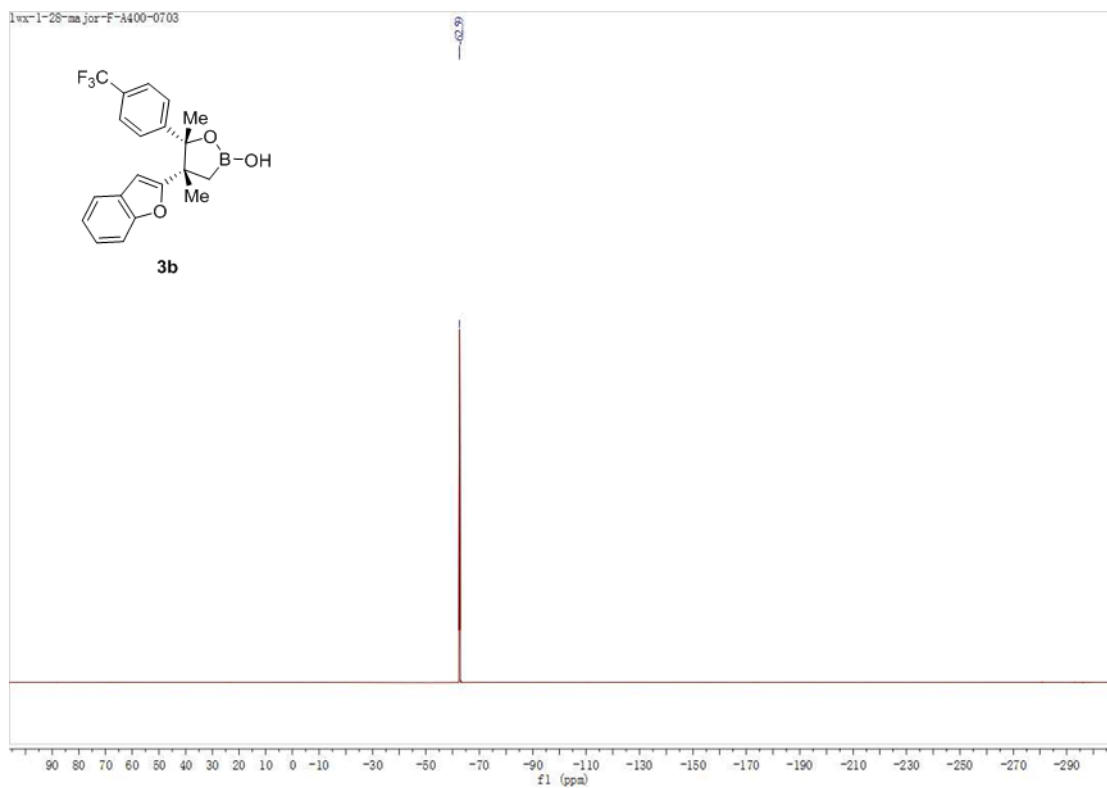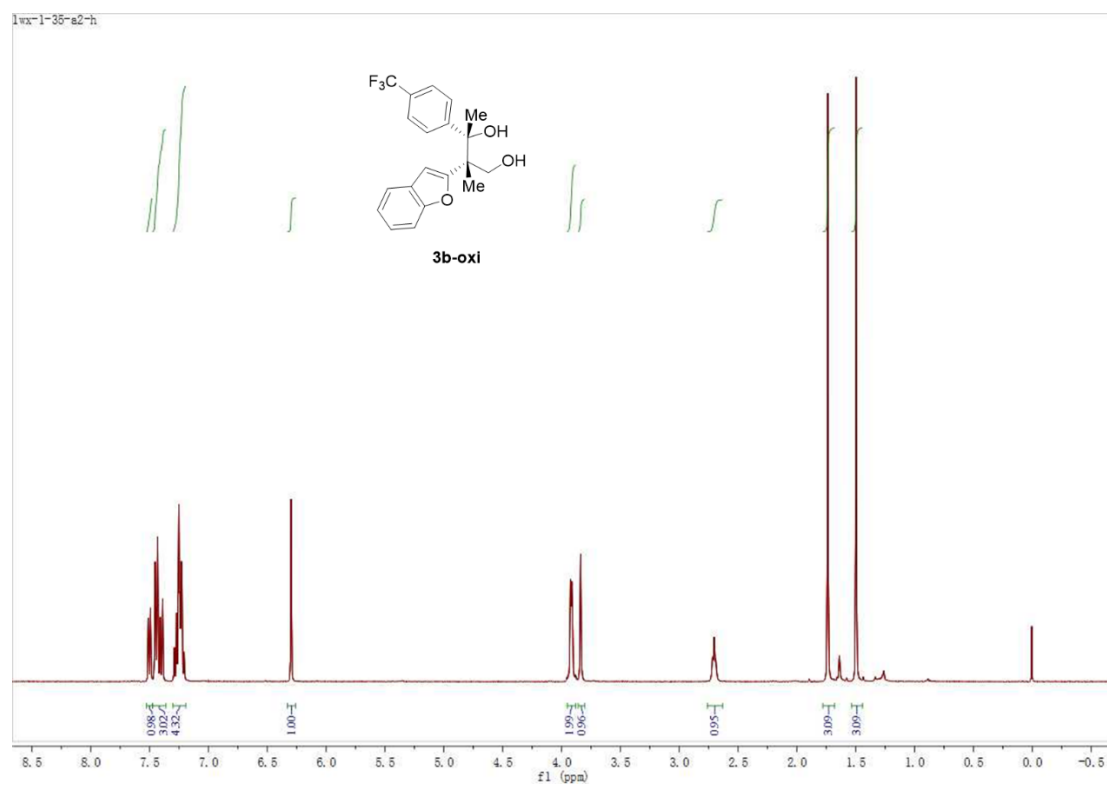

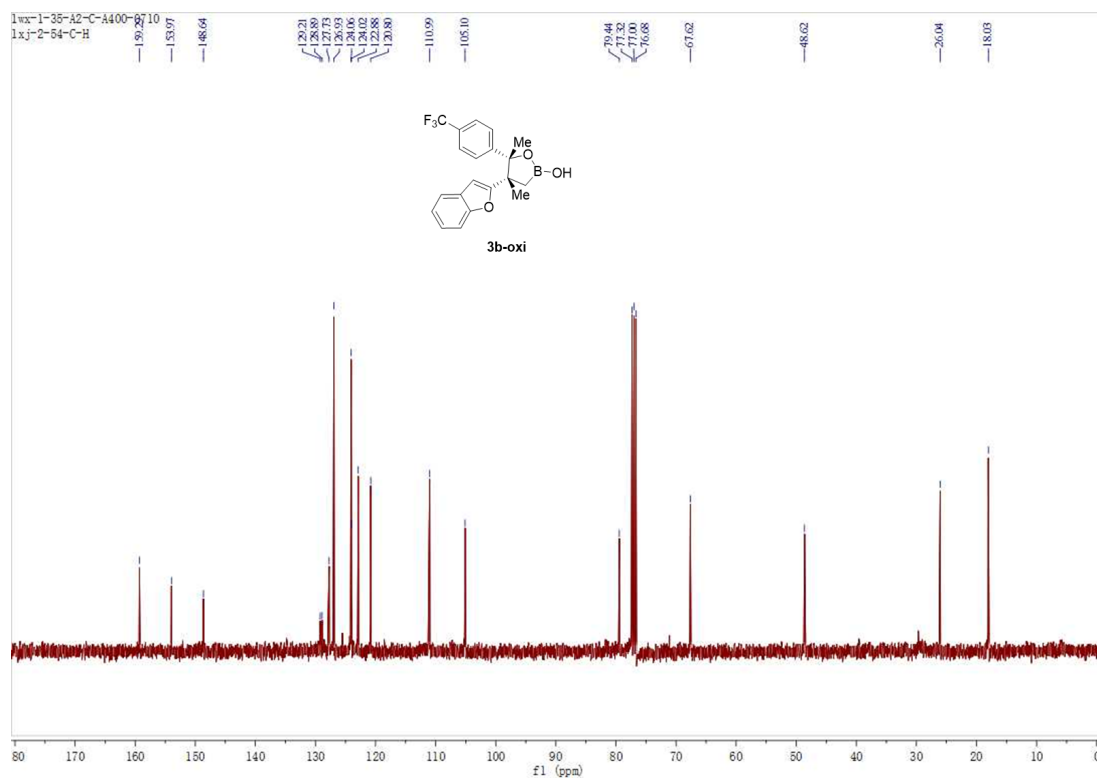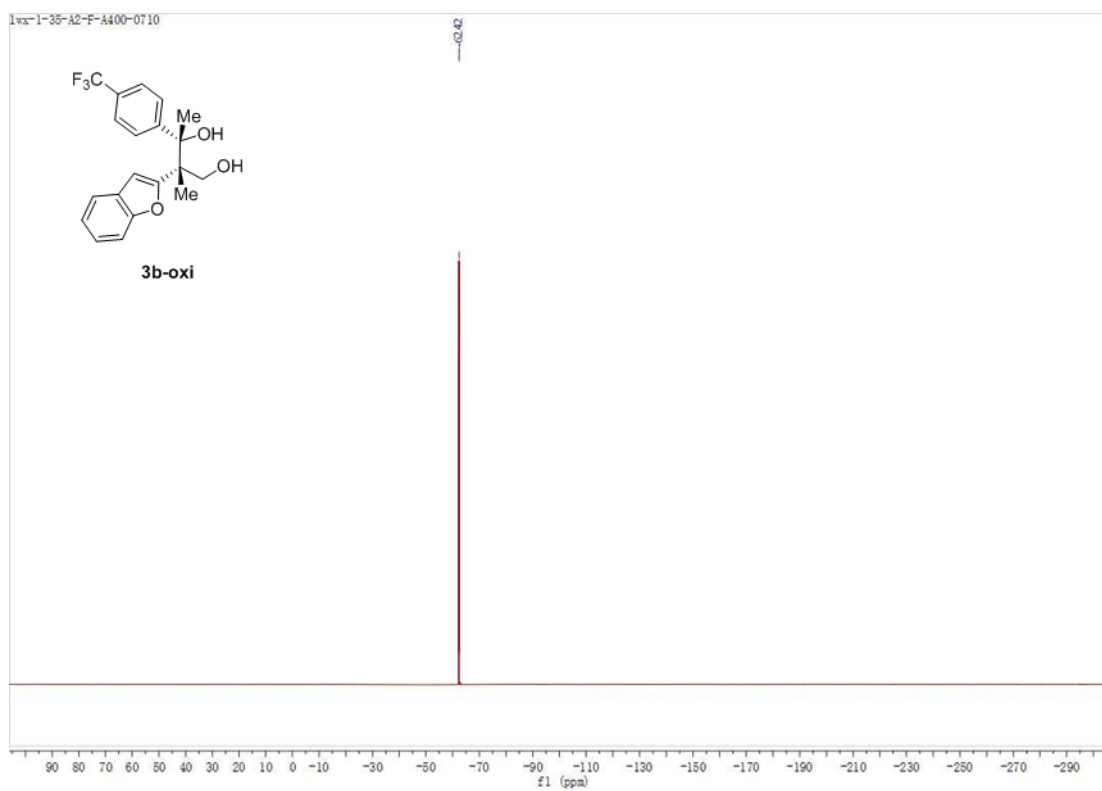

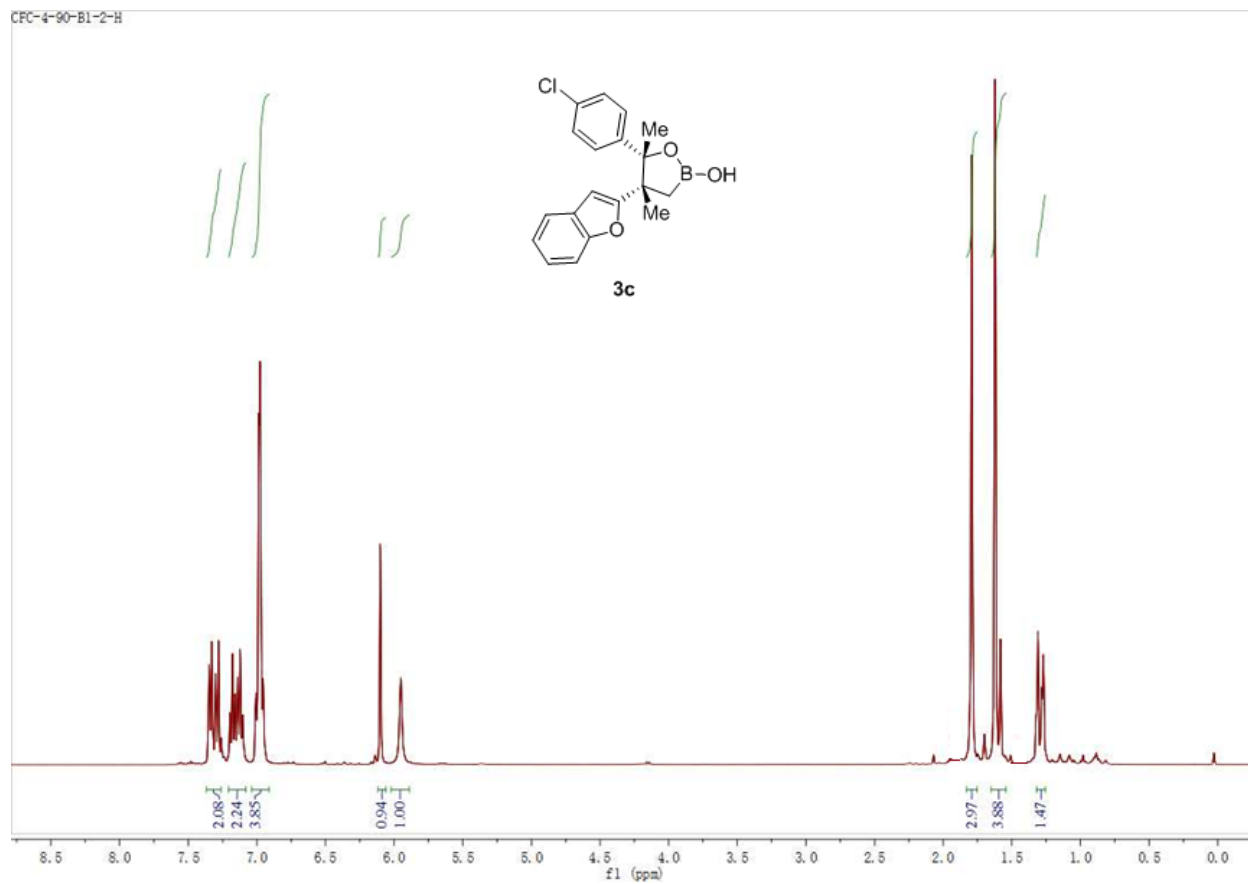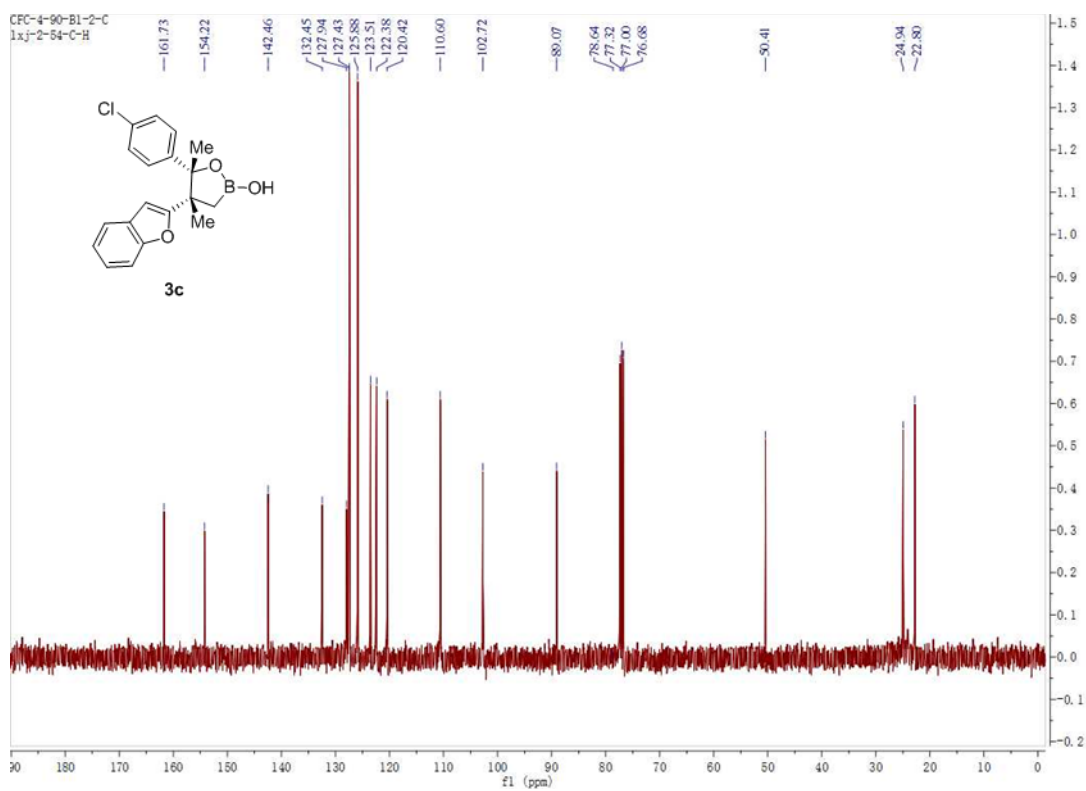

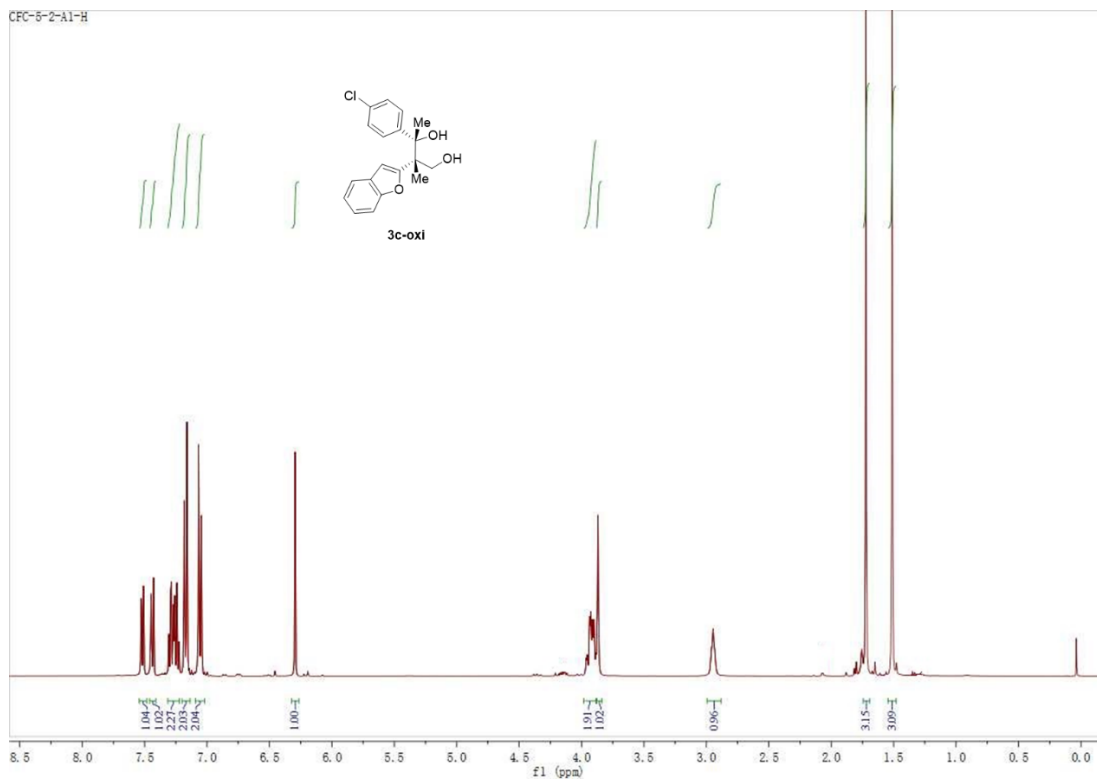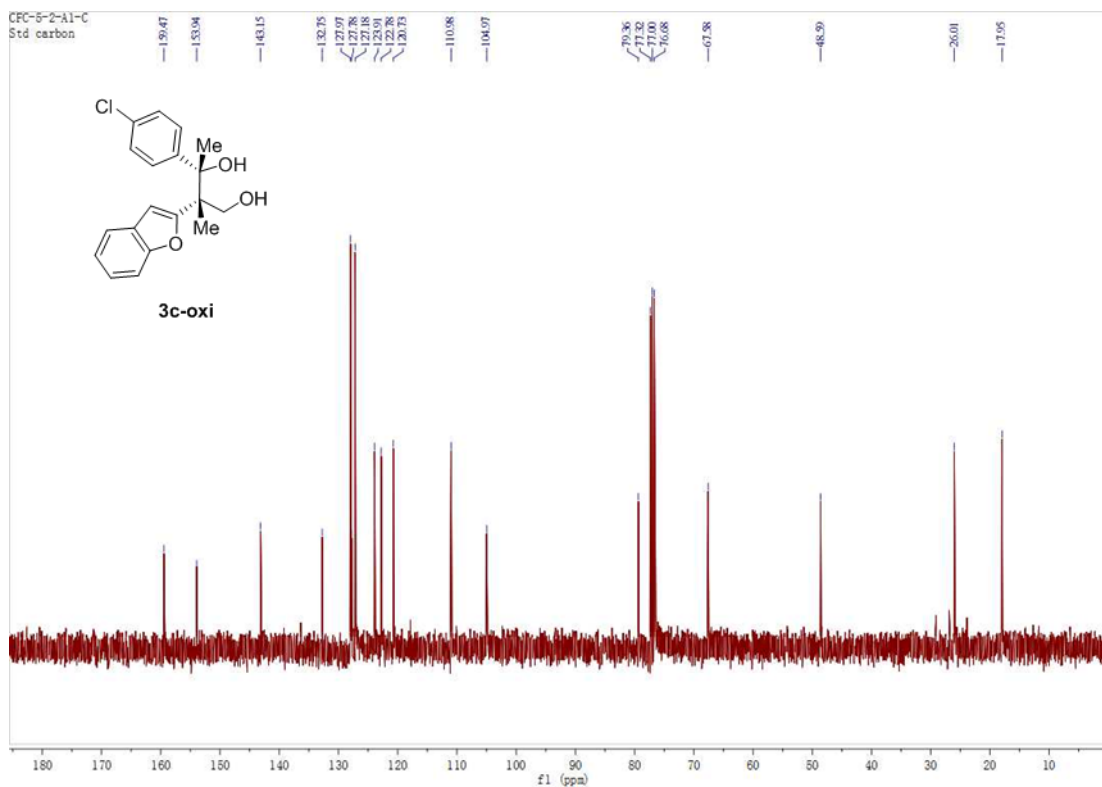

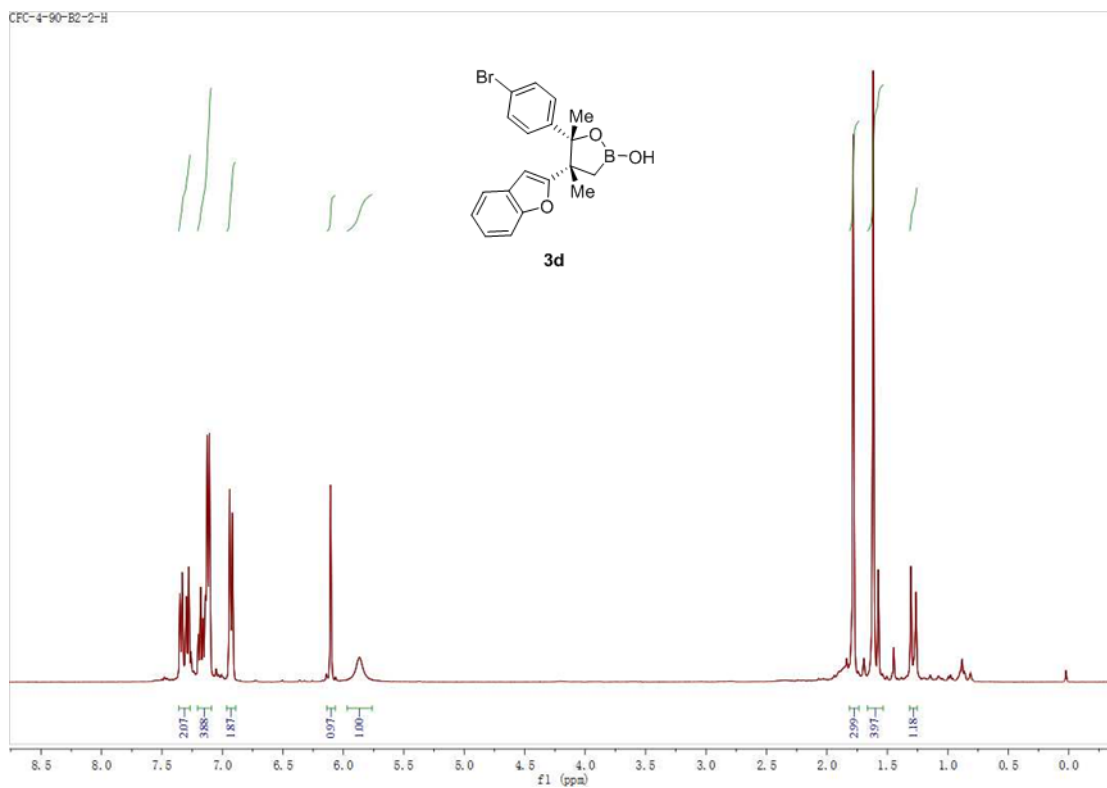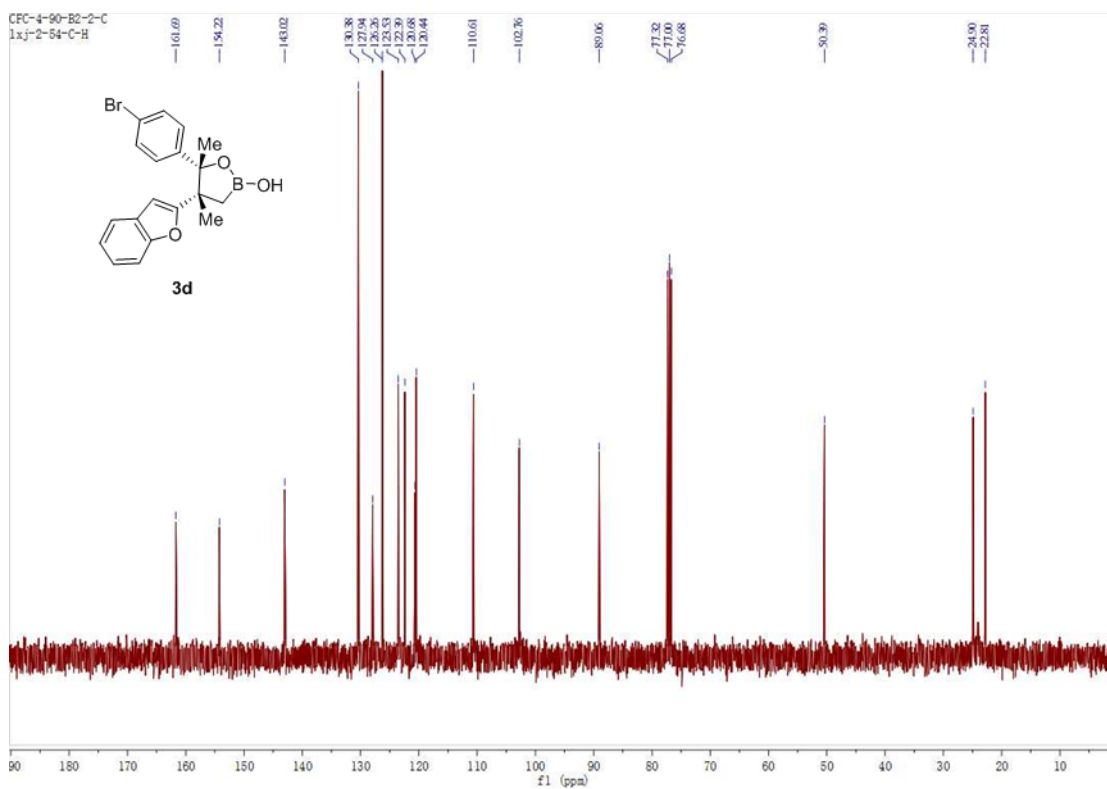

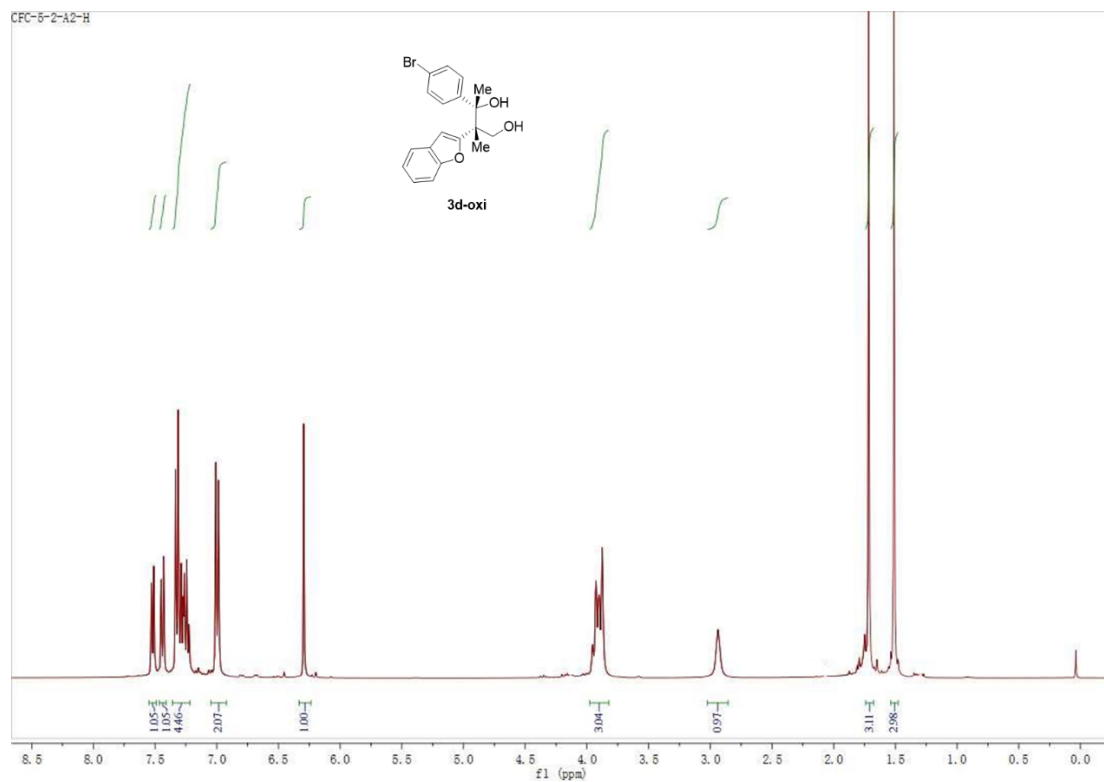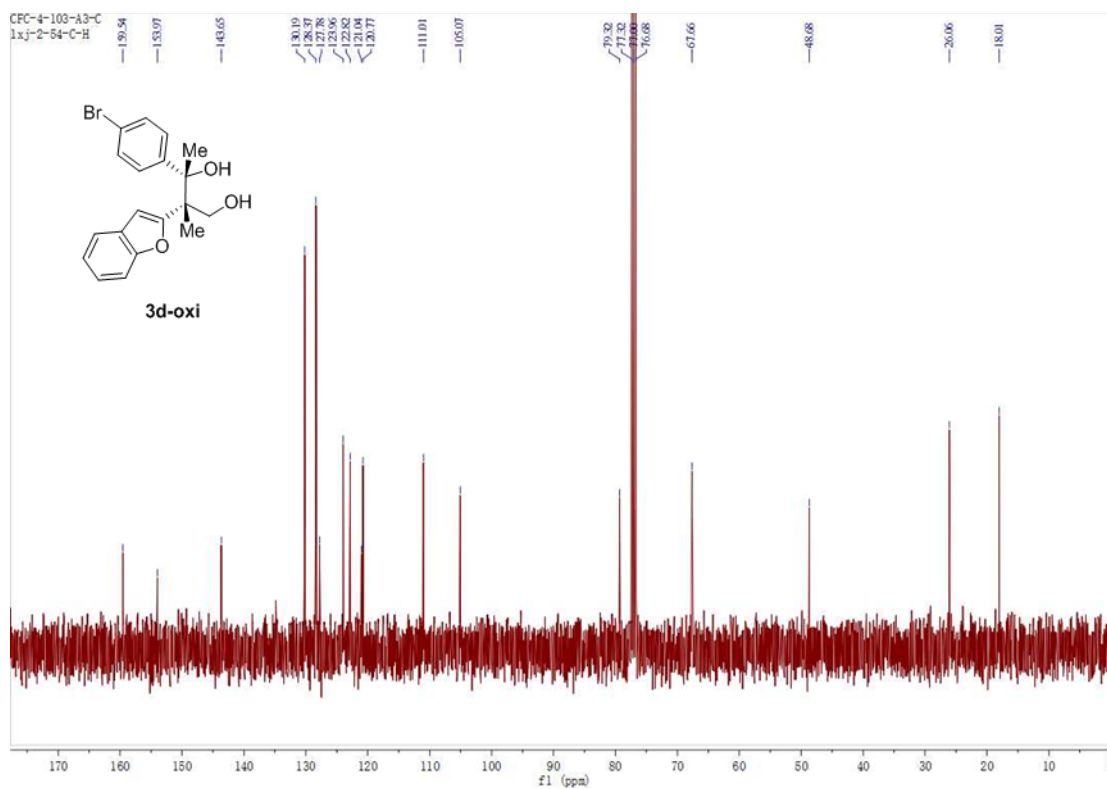

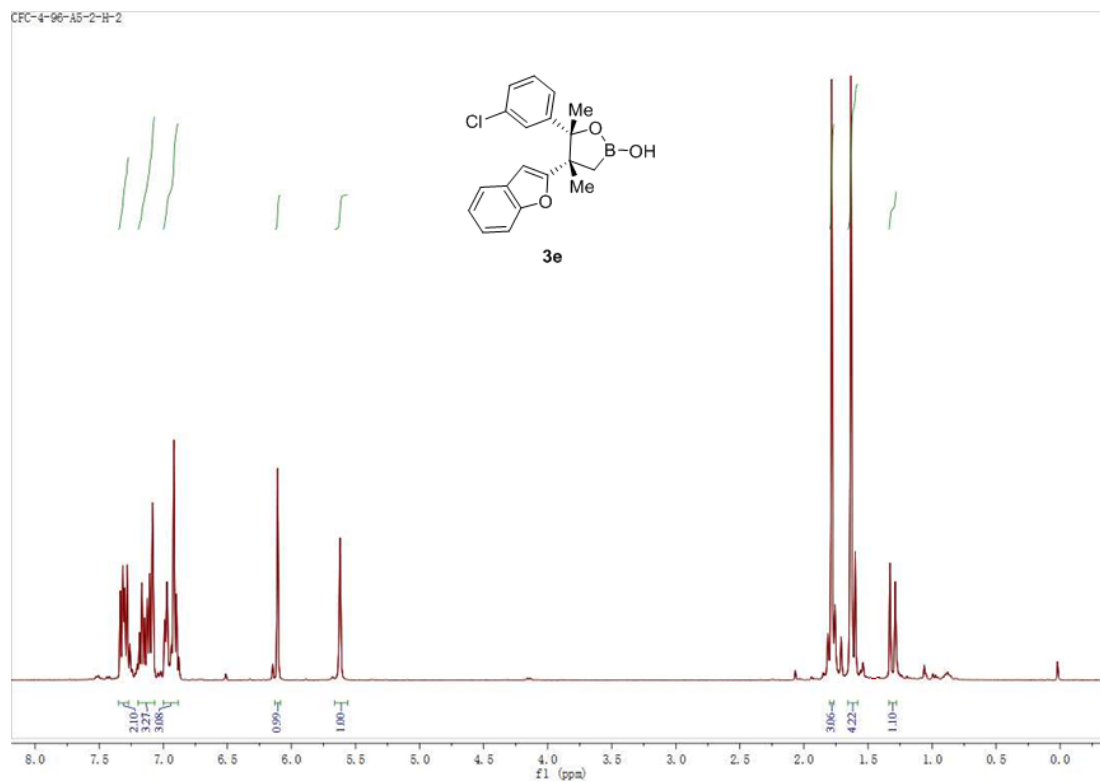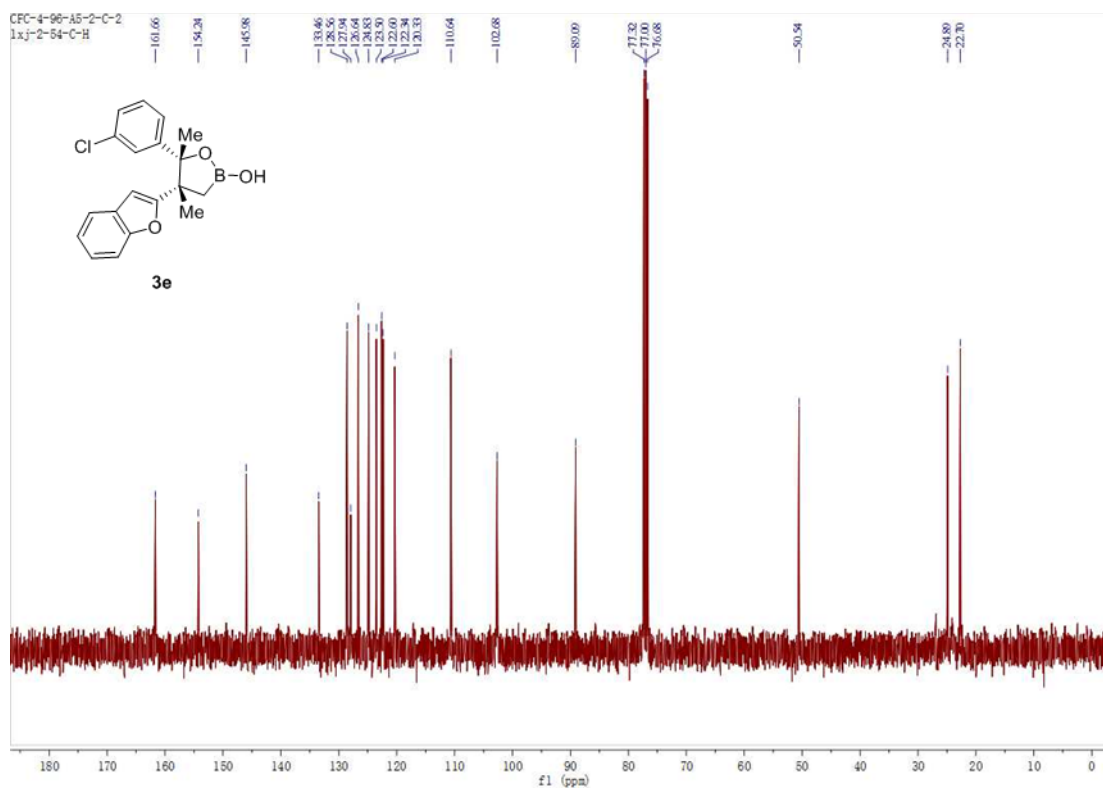

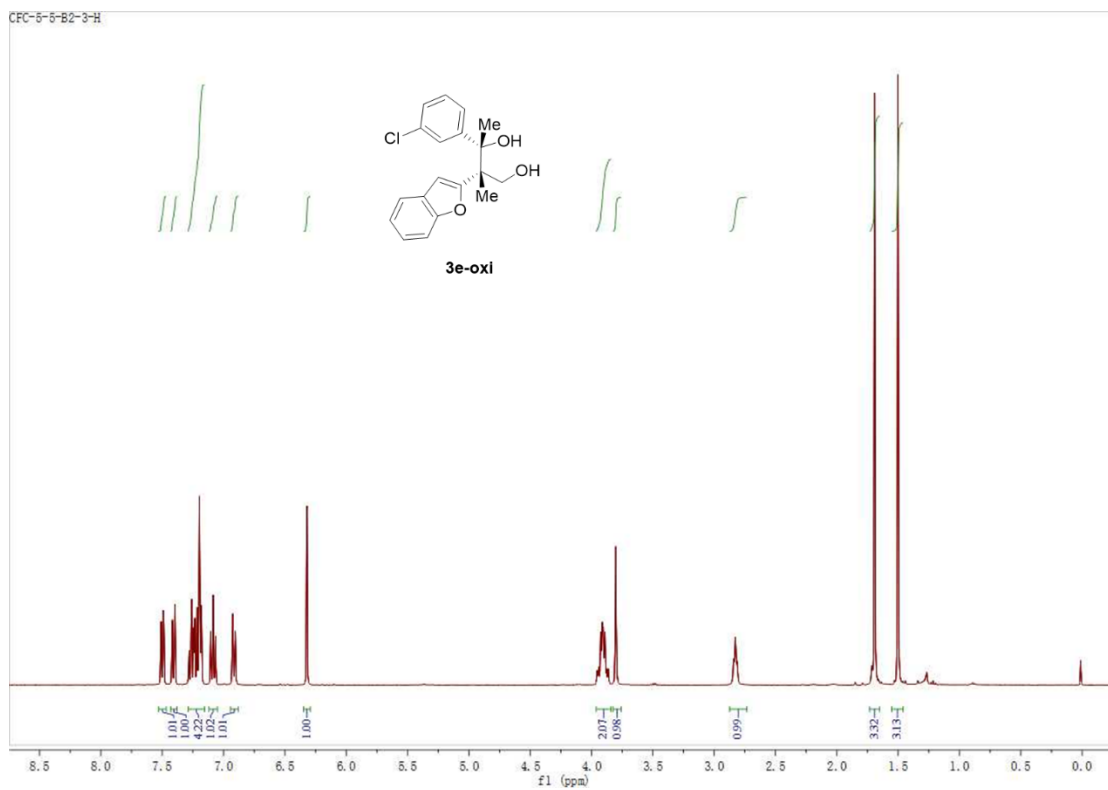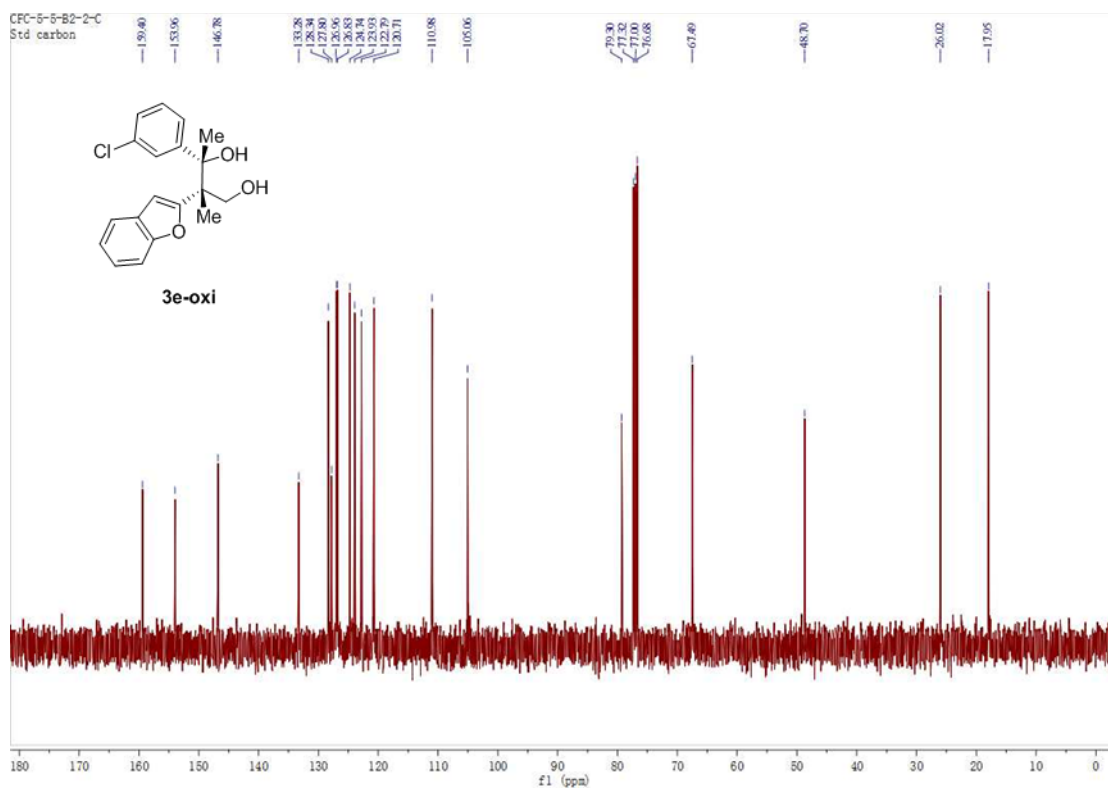



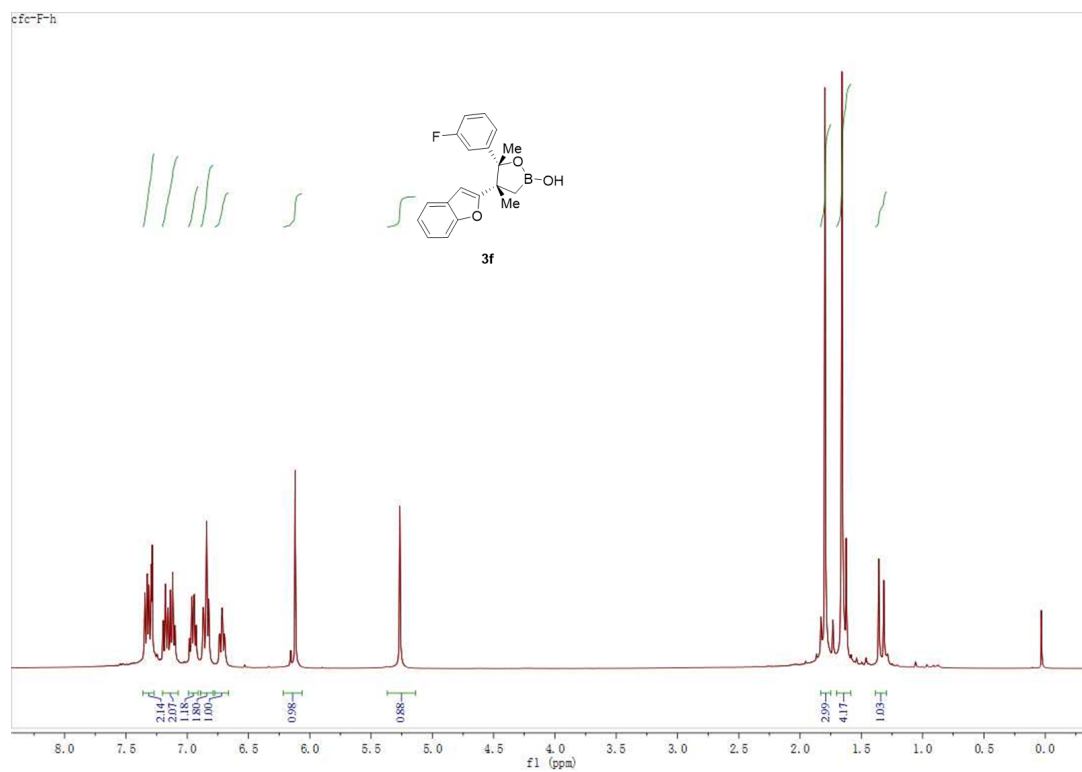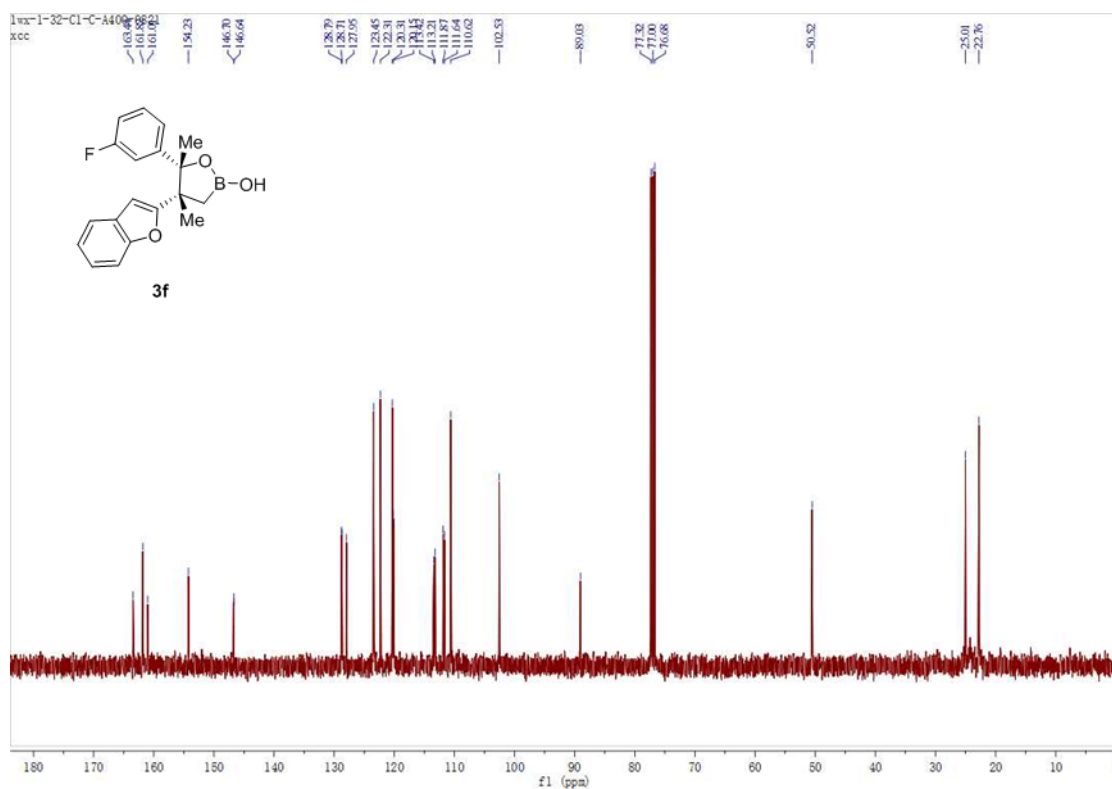

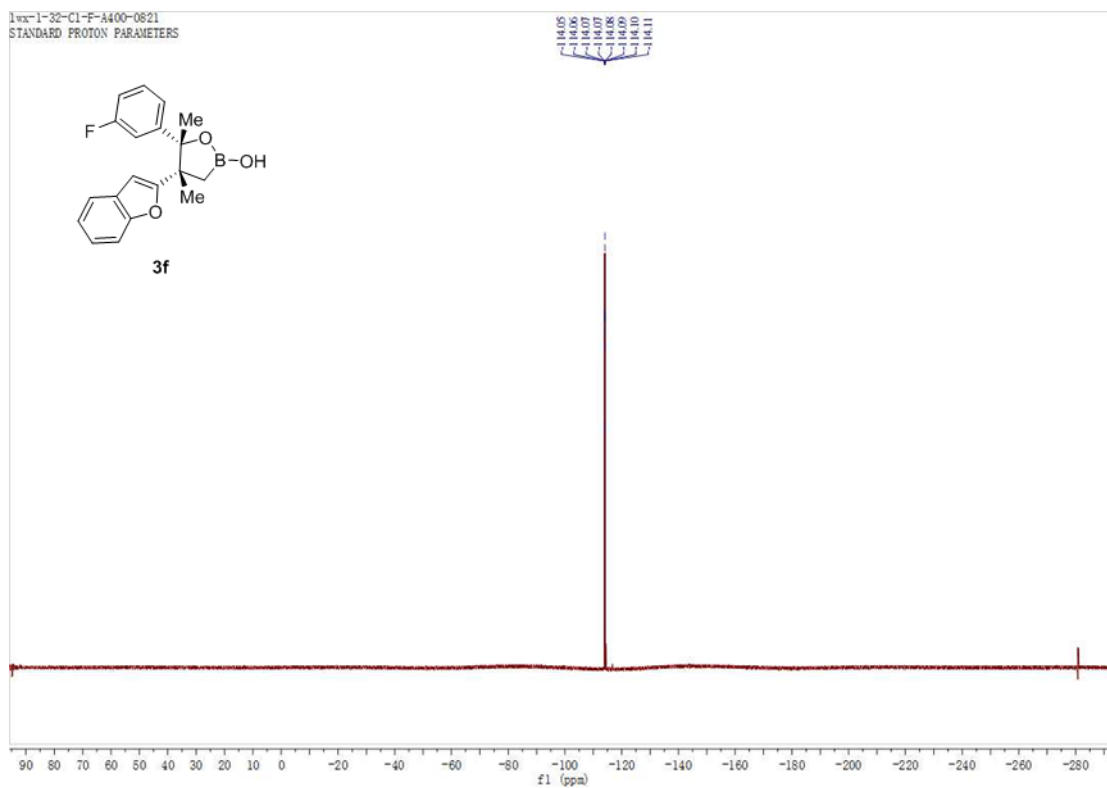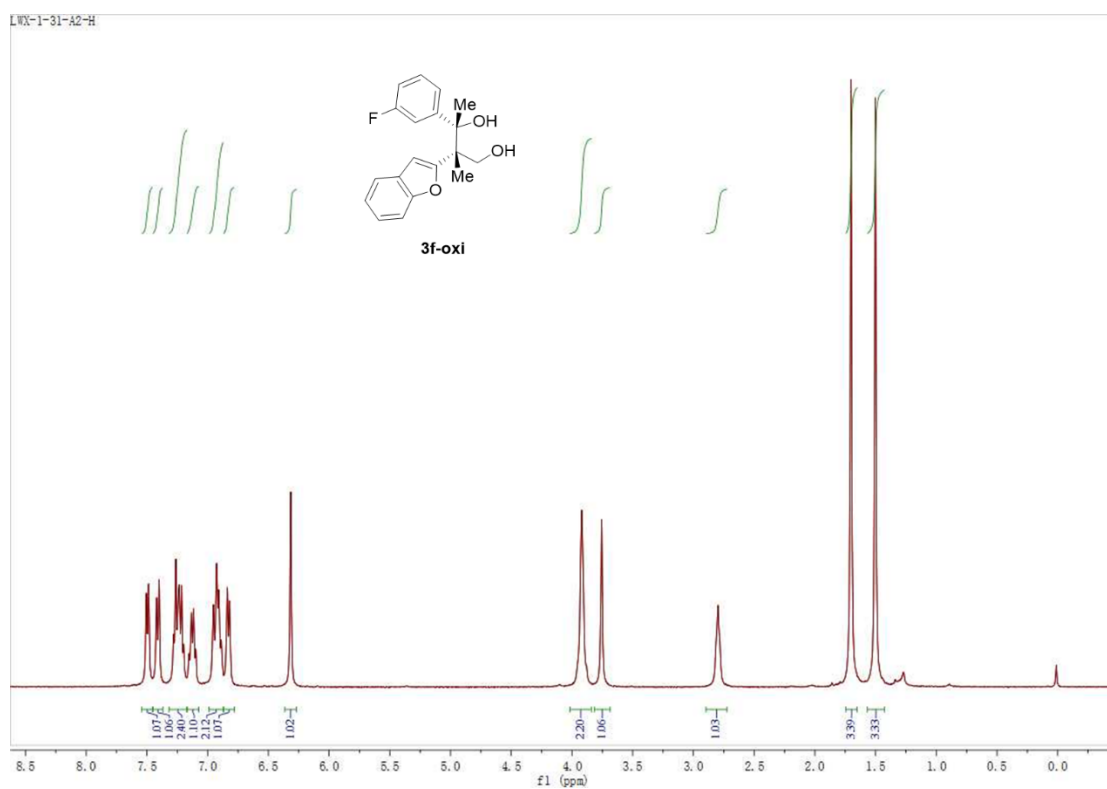

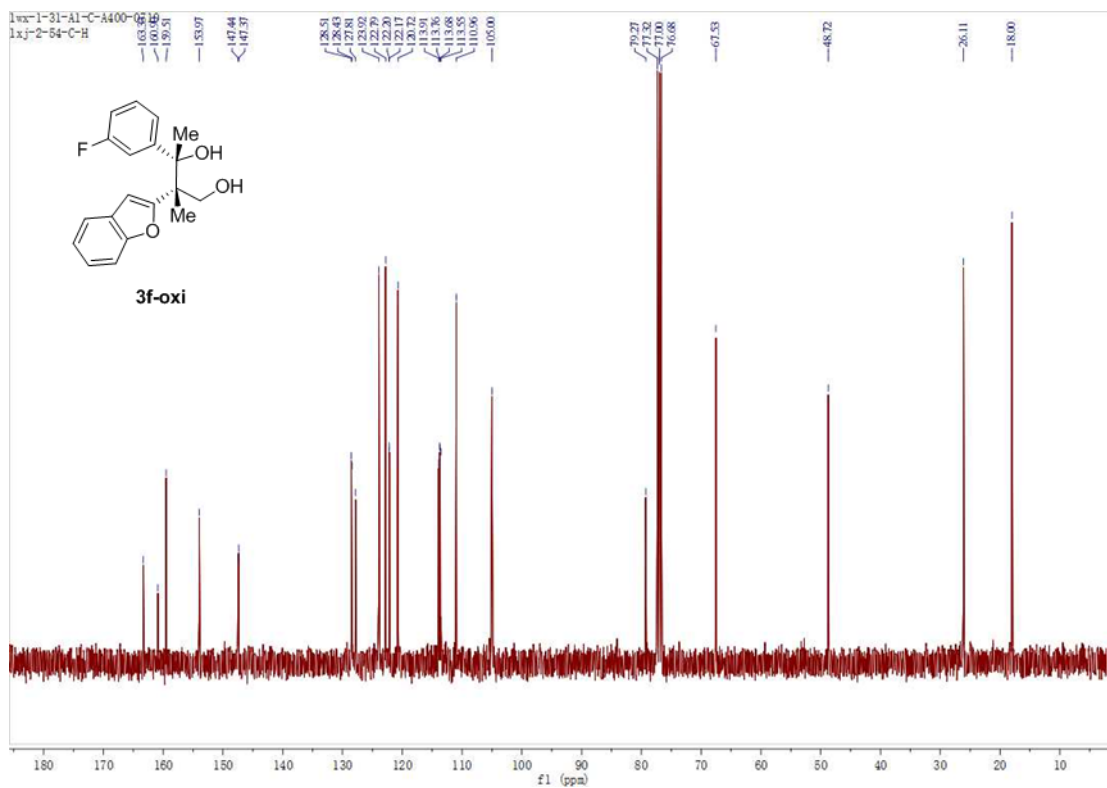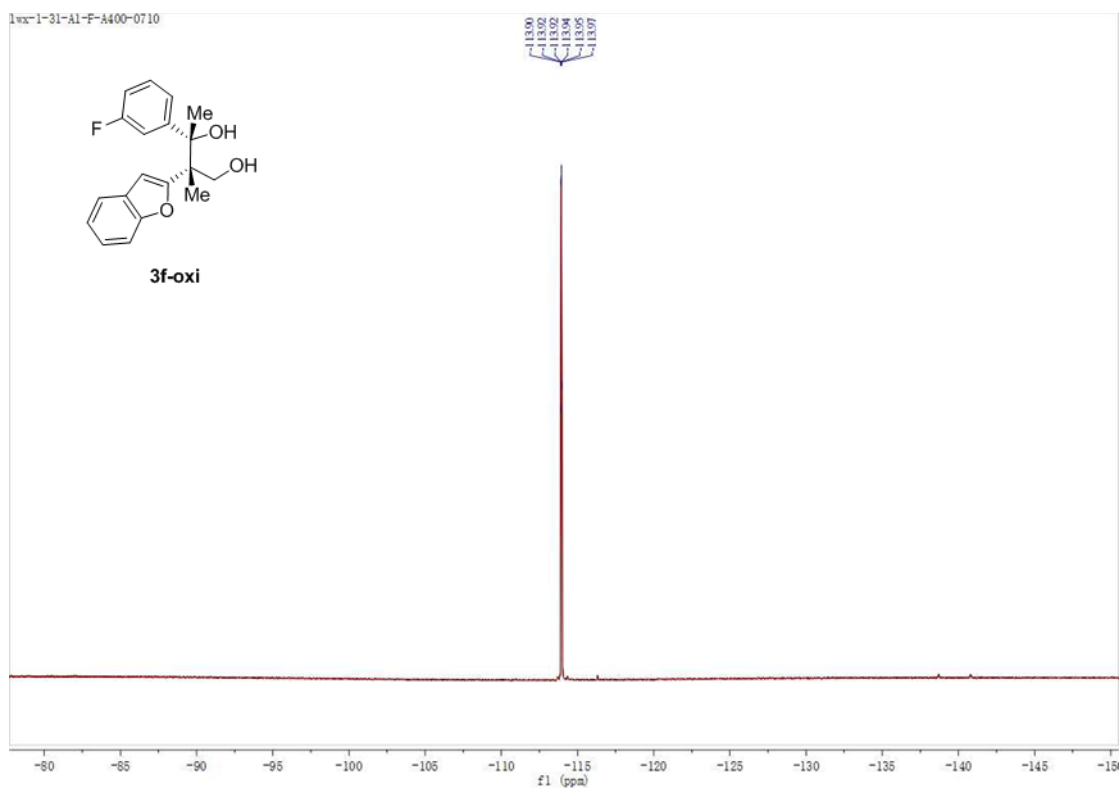

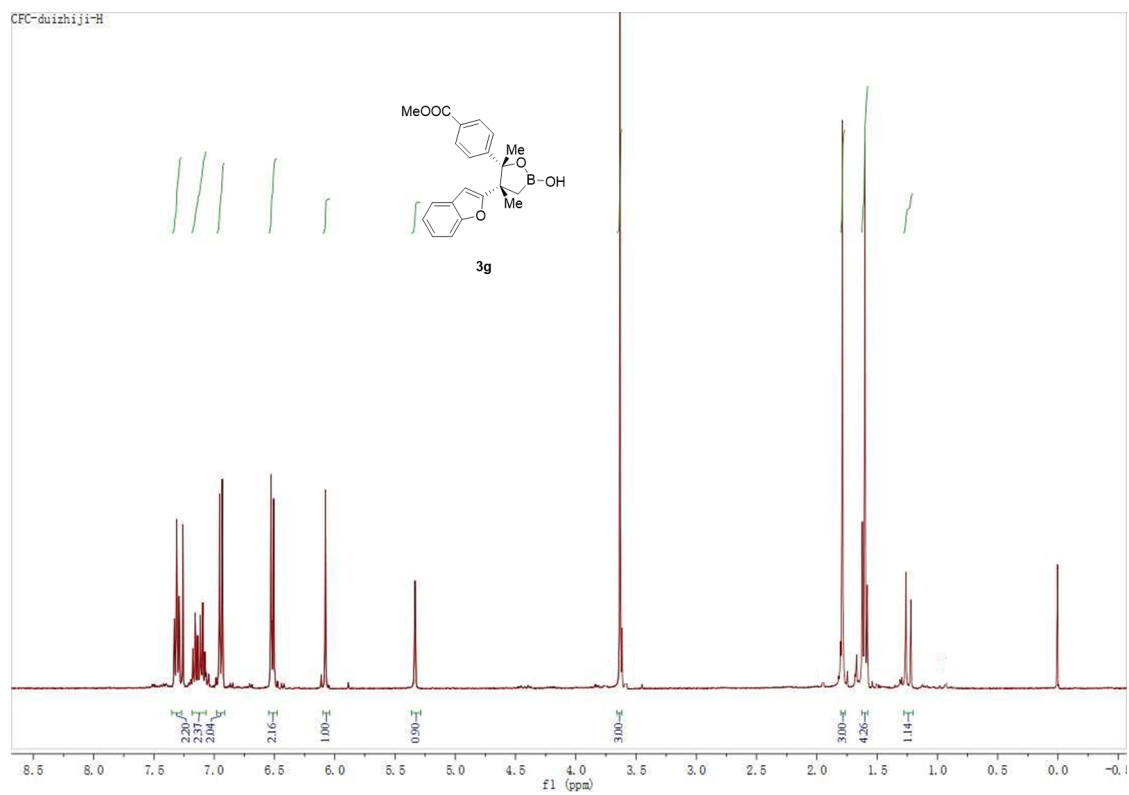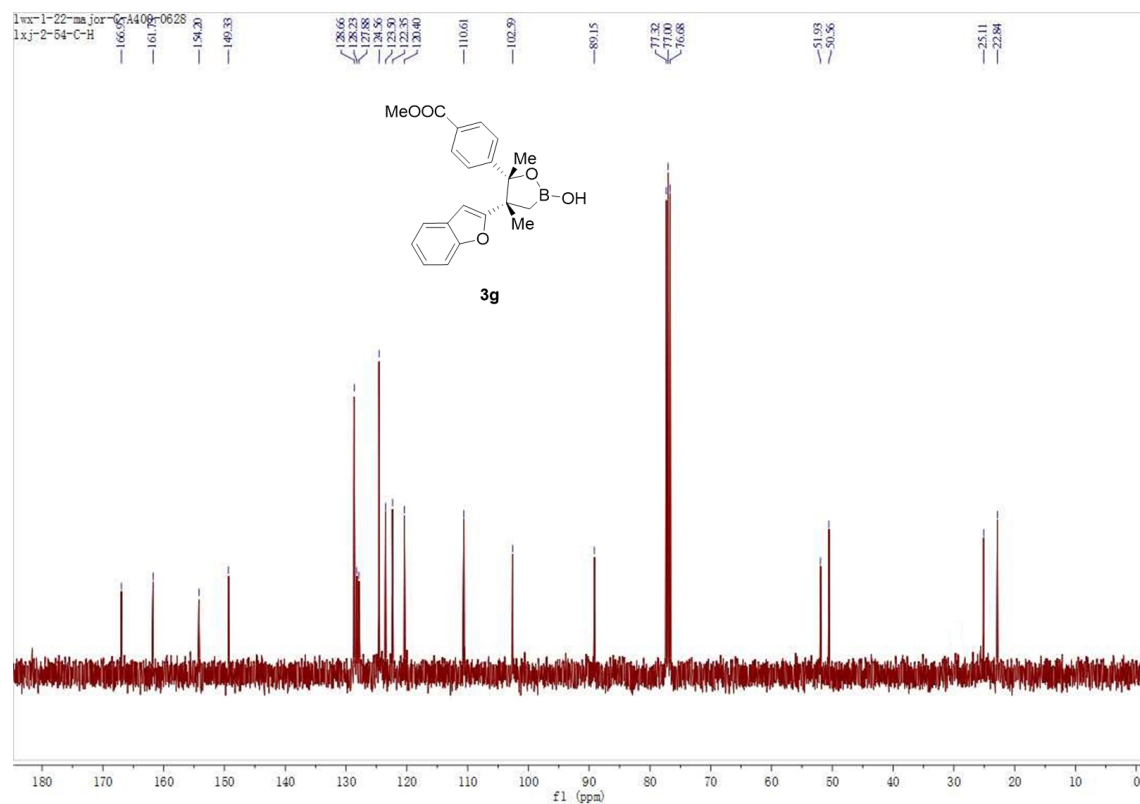

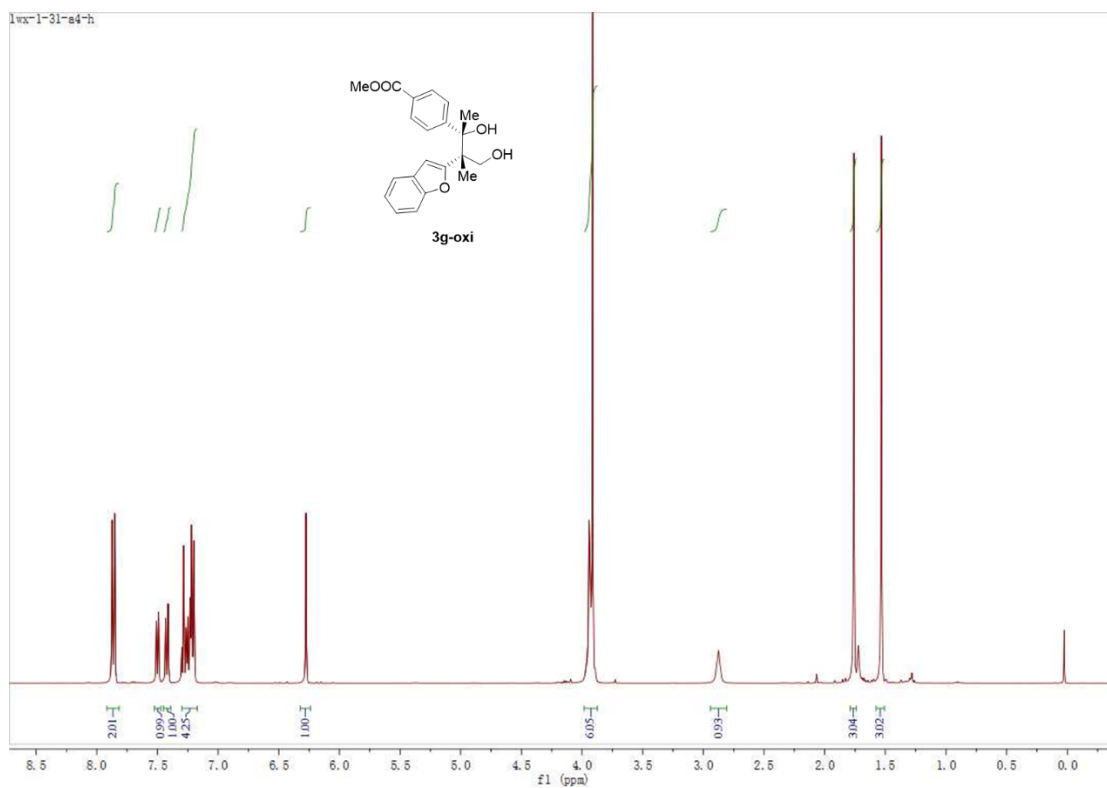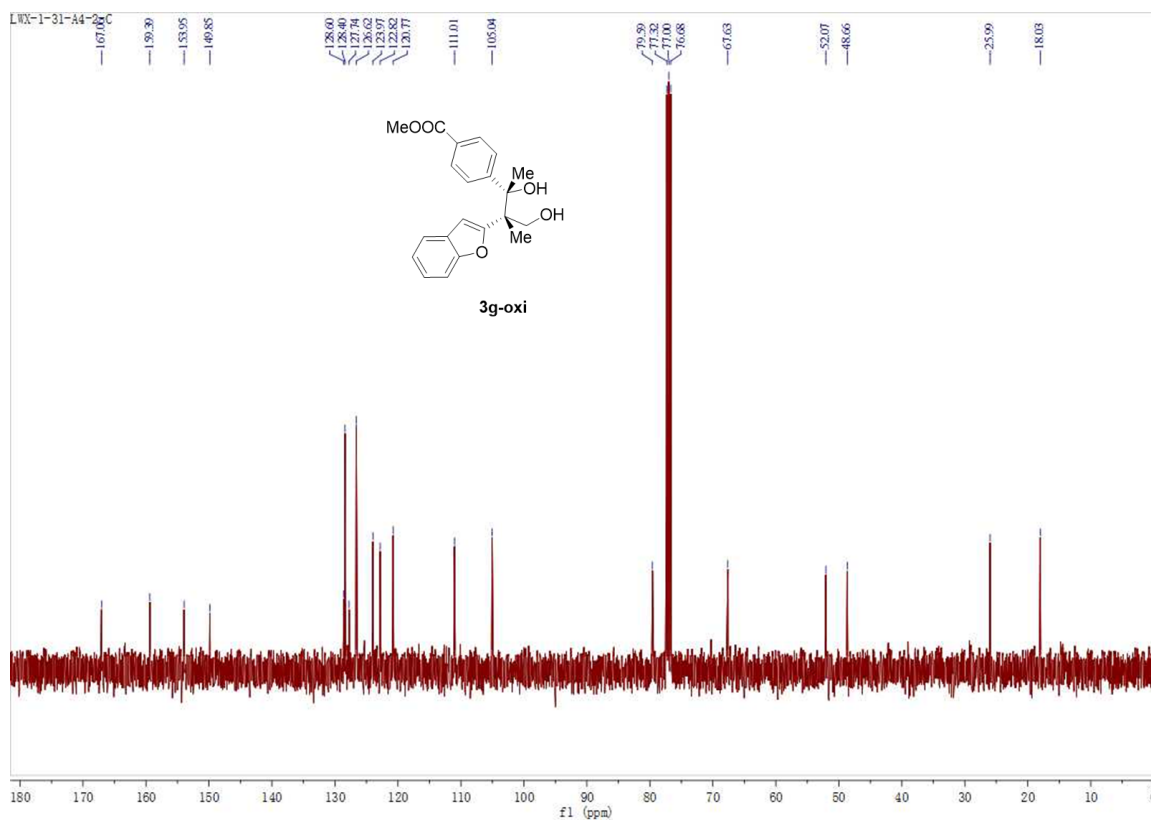

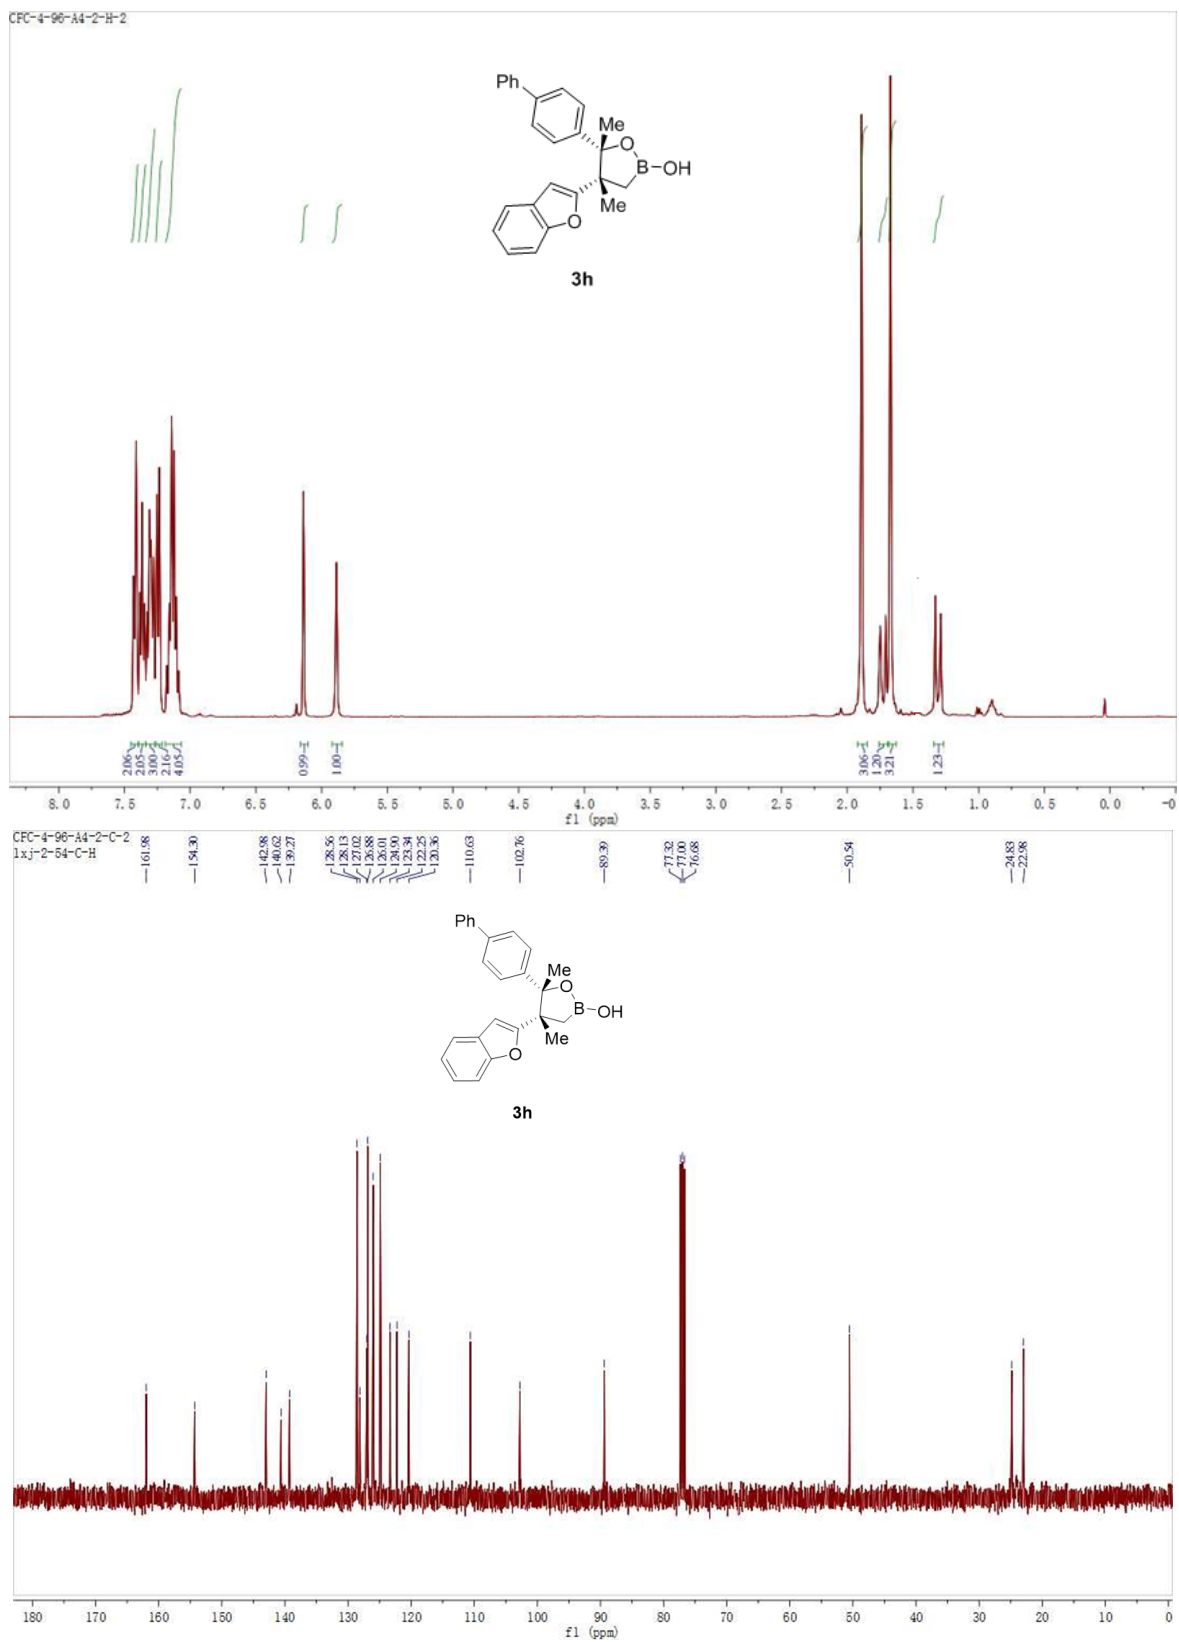

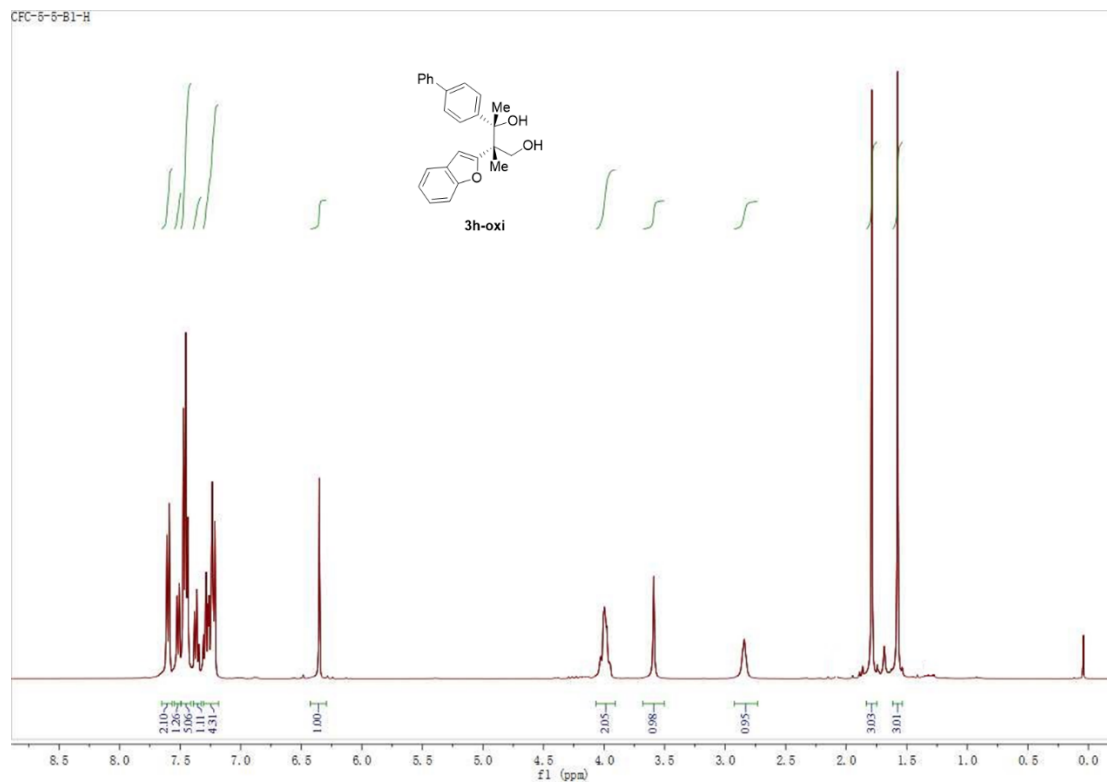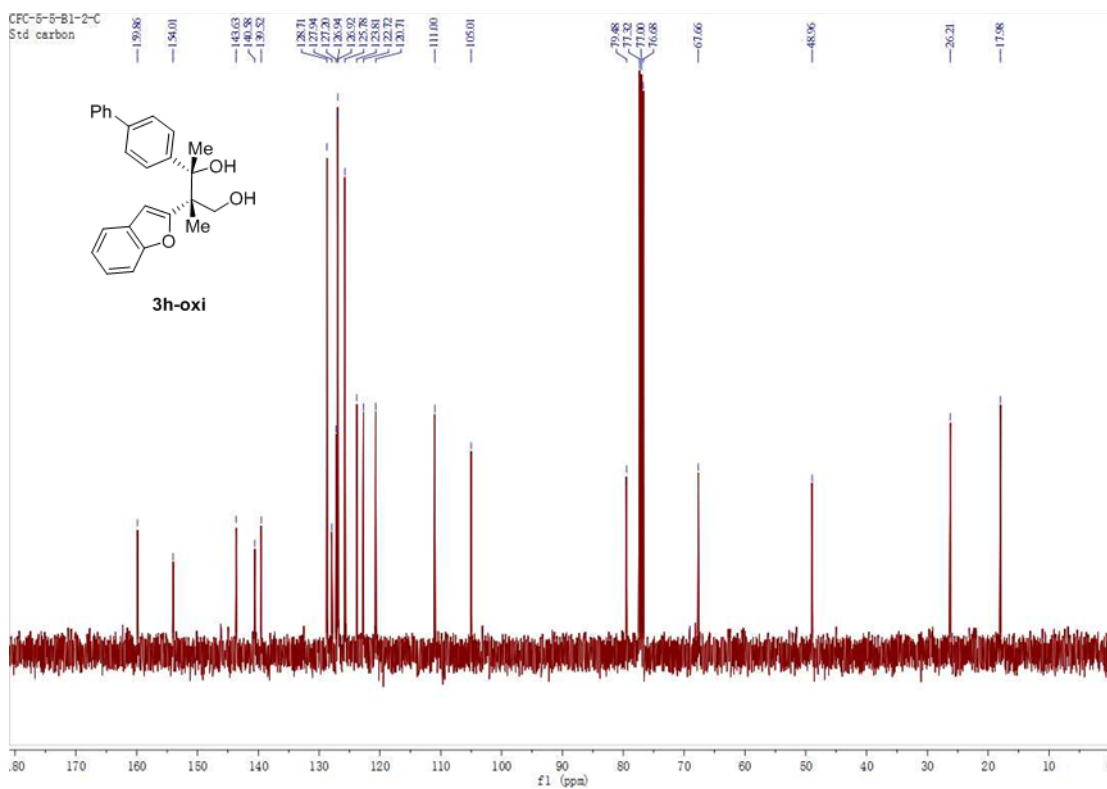

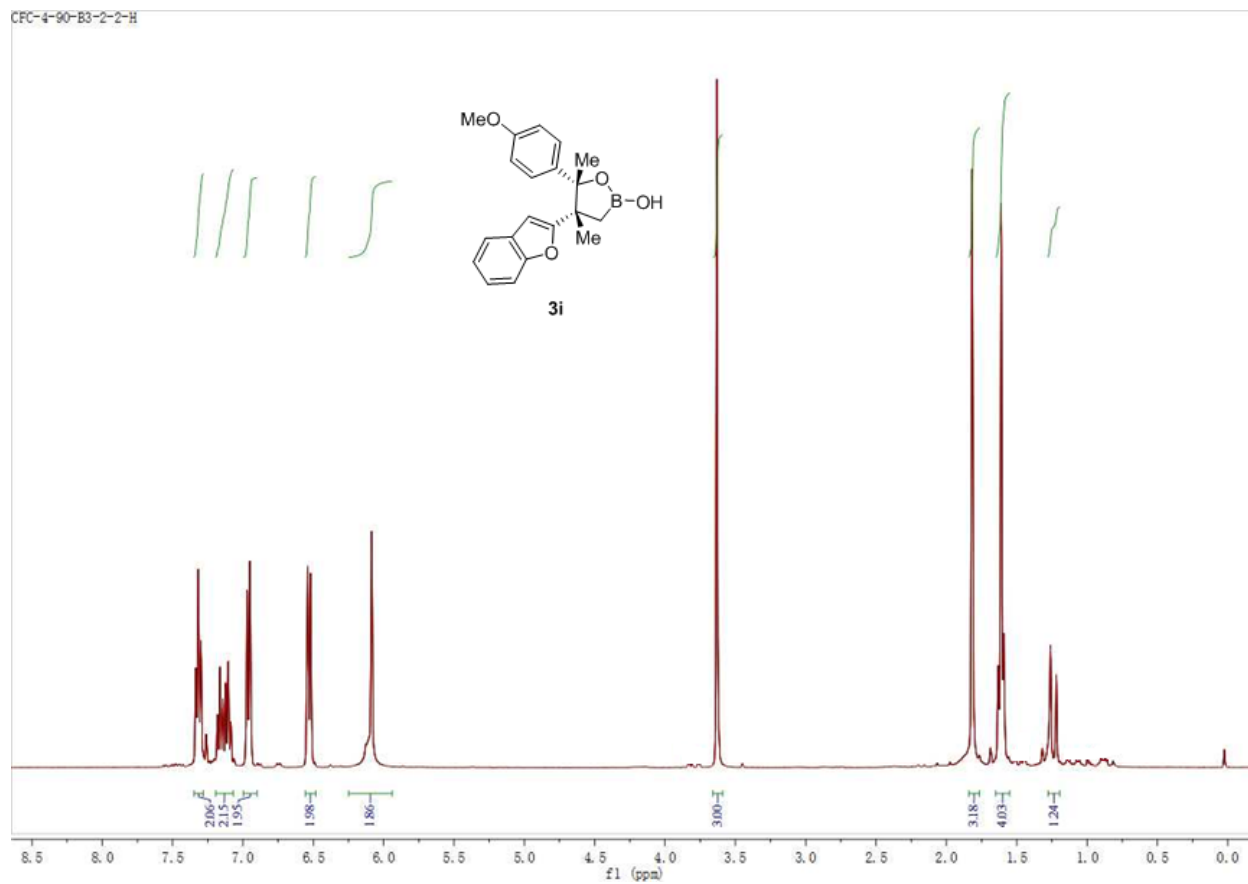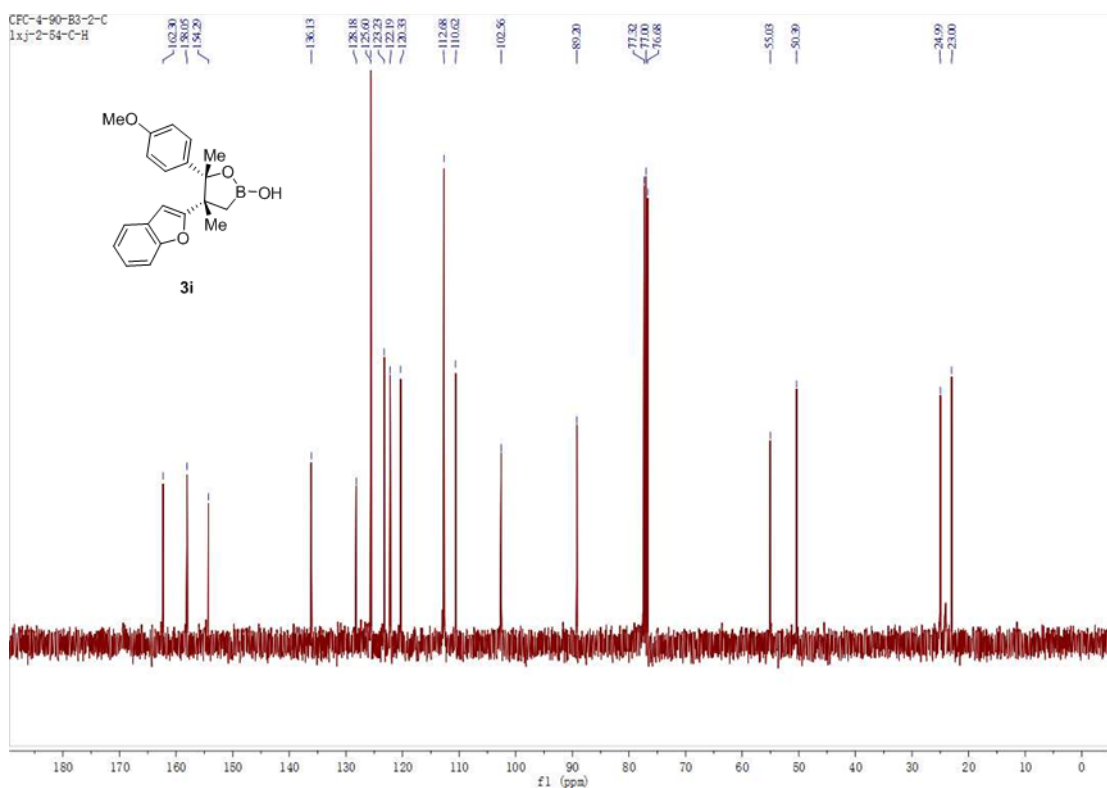



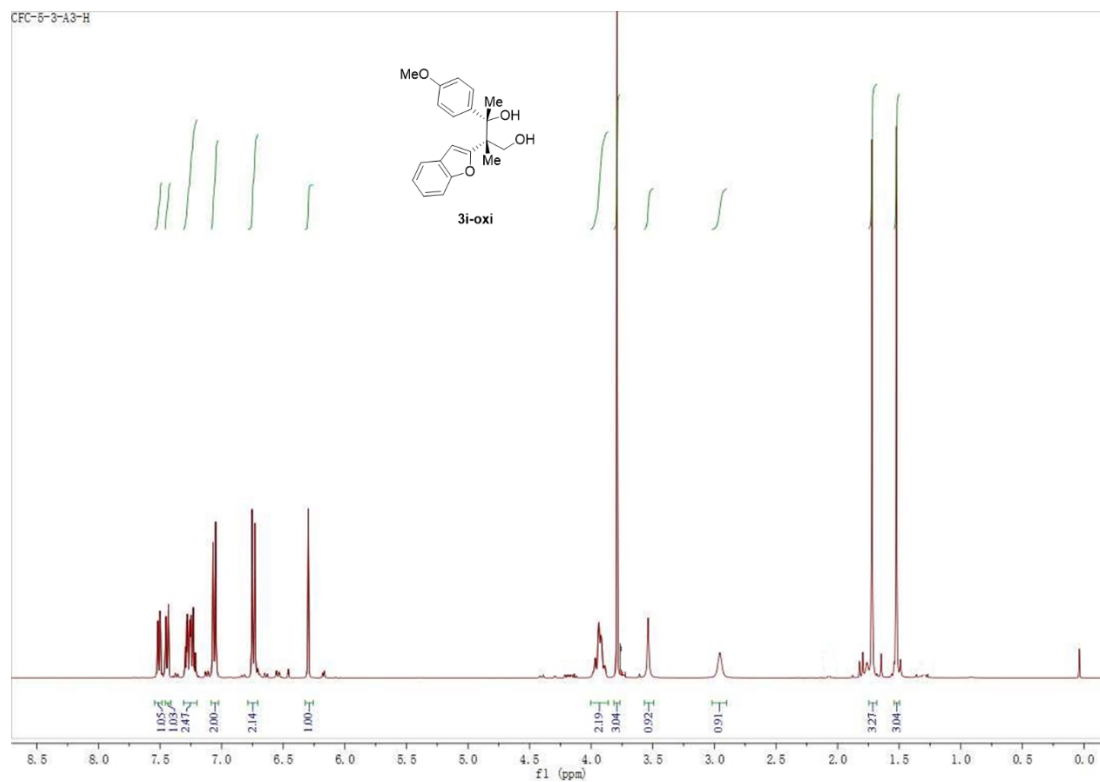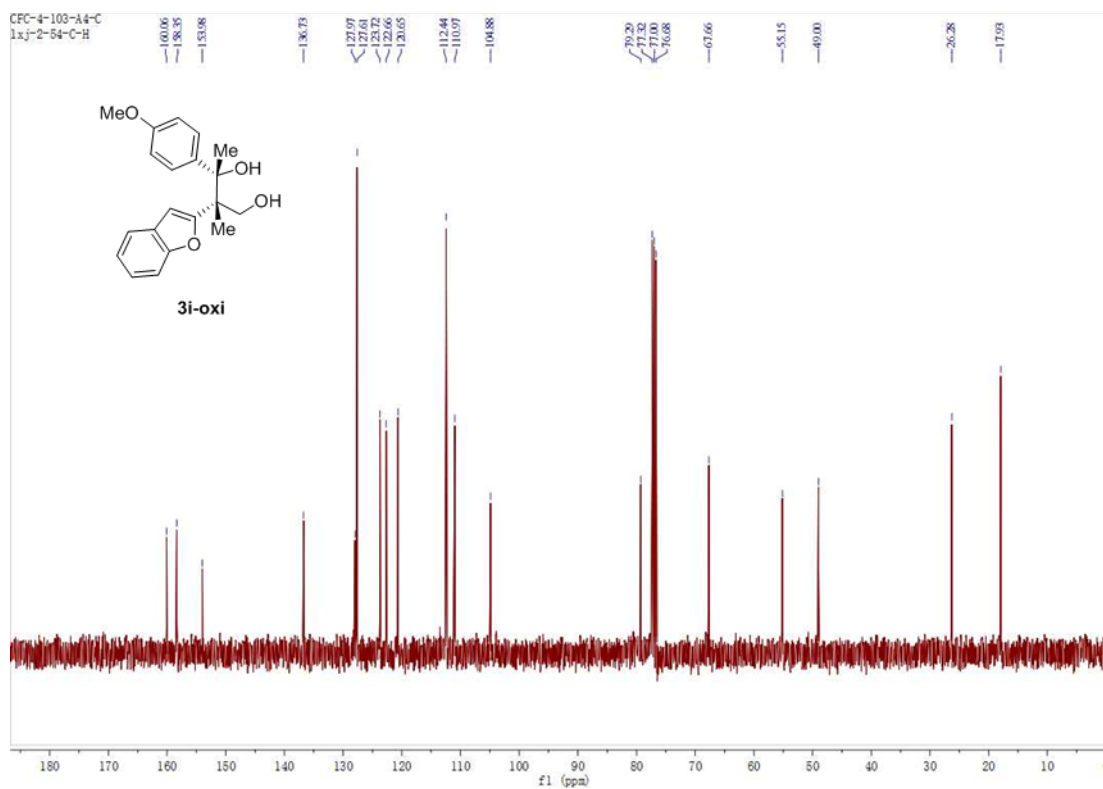

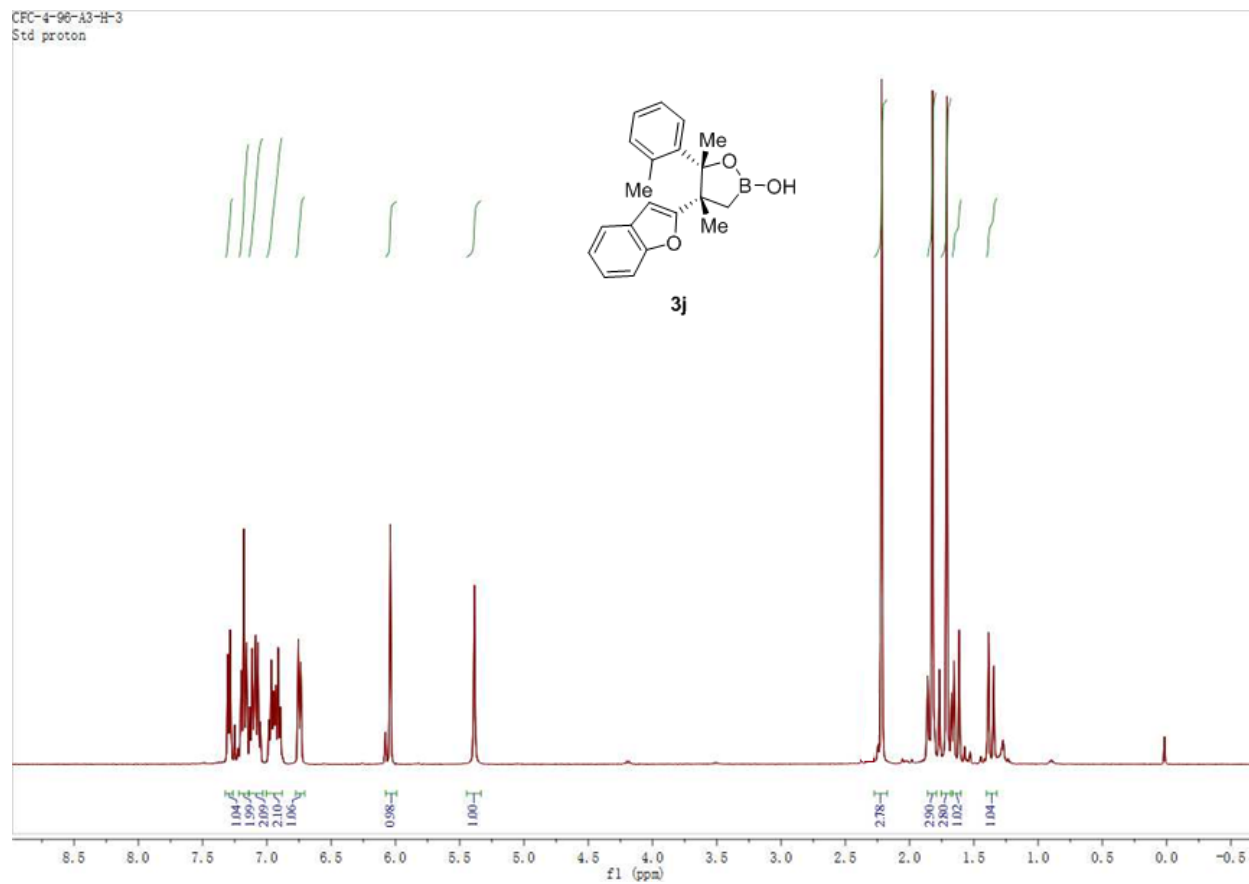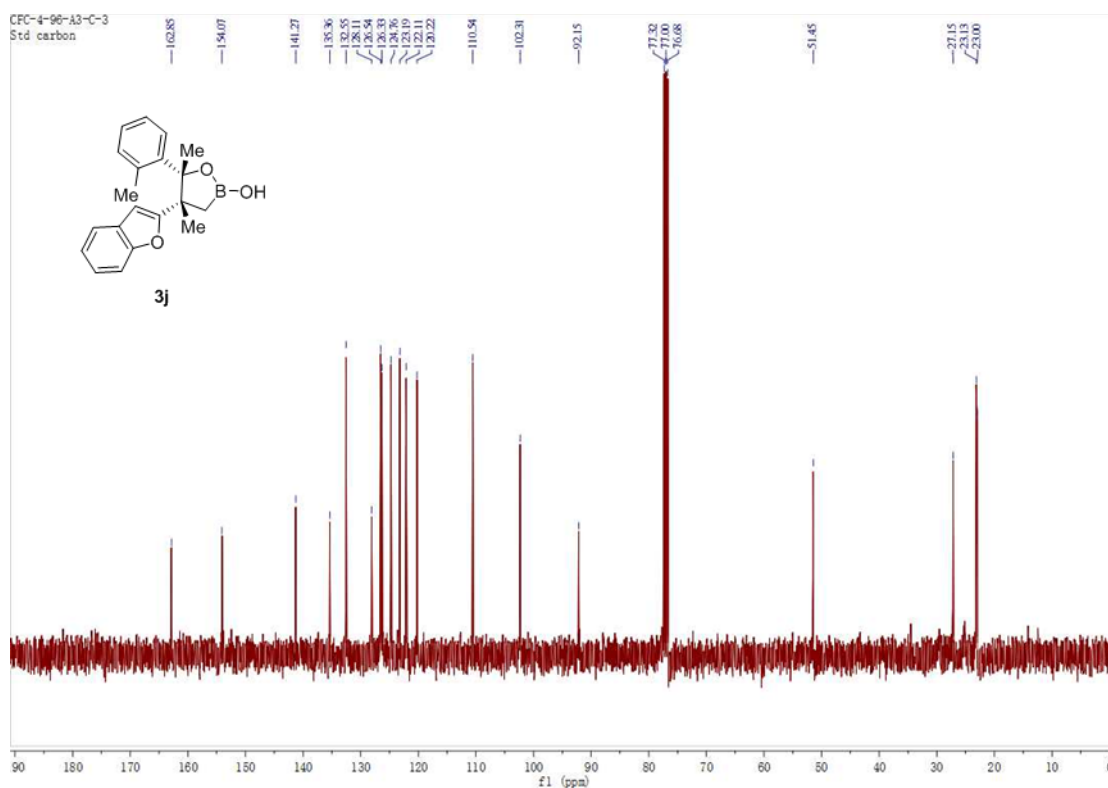

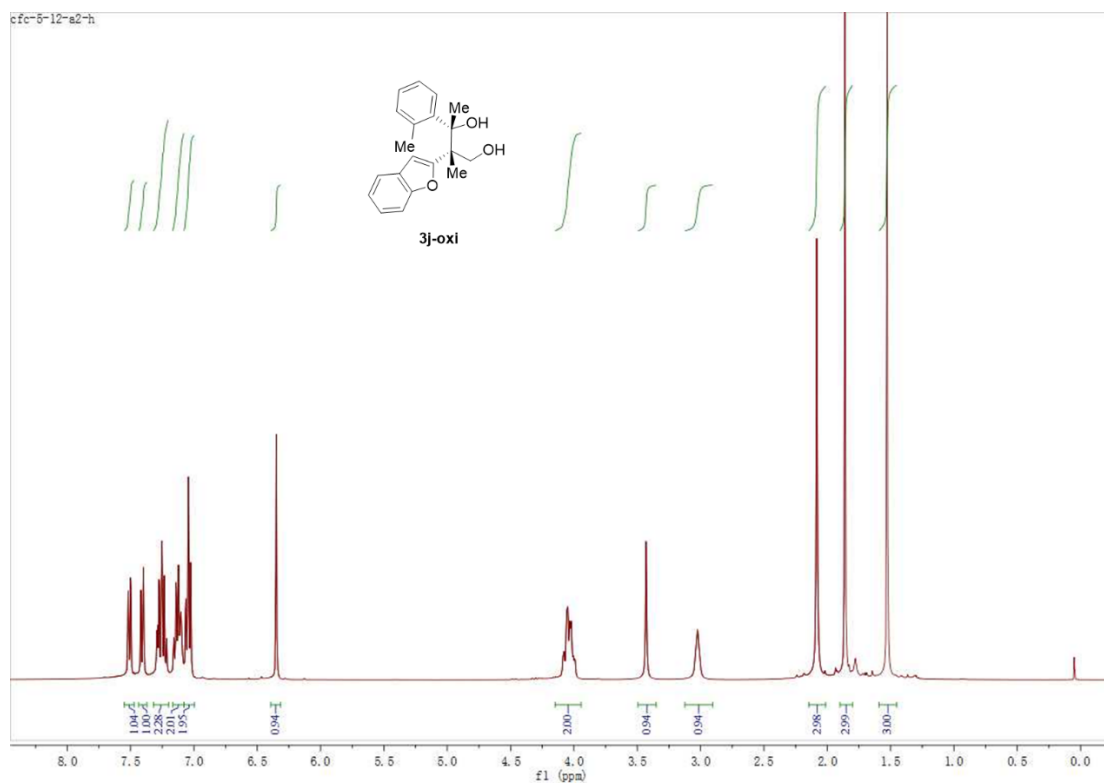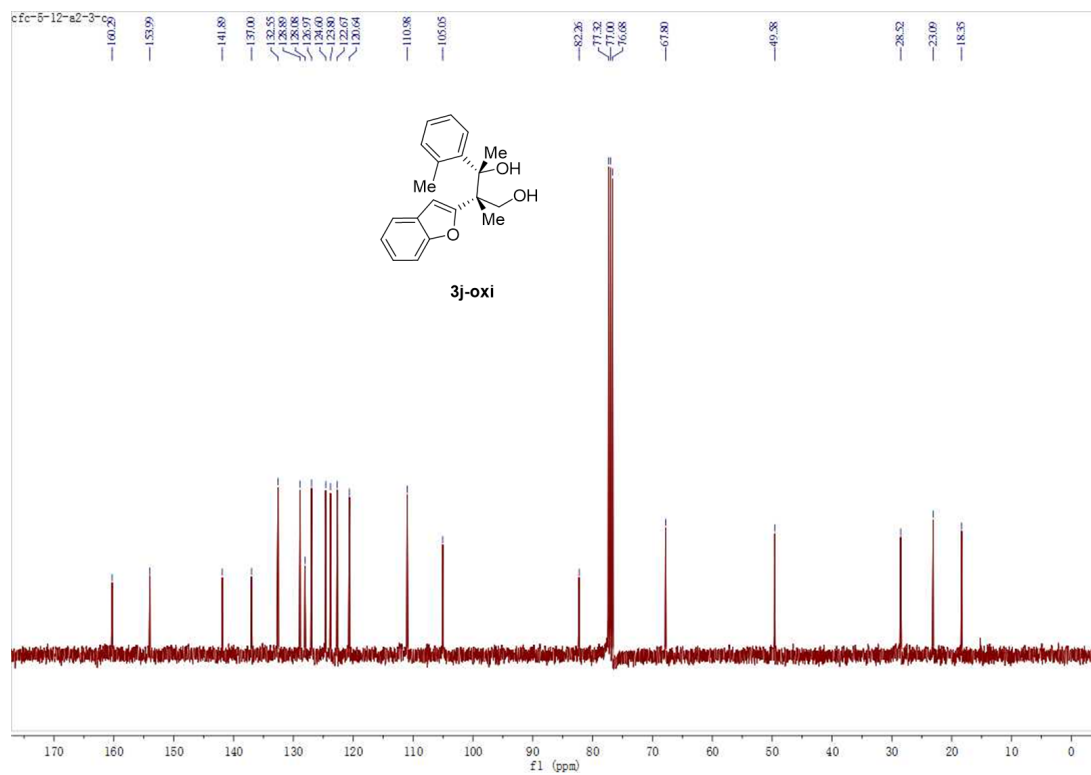

CFC-4-96-A2-H-3  
Std proton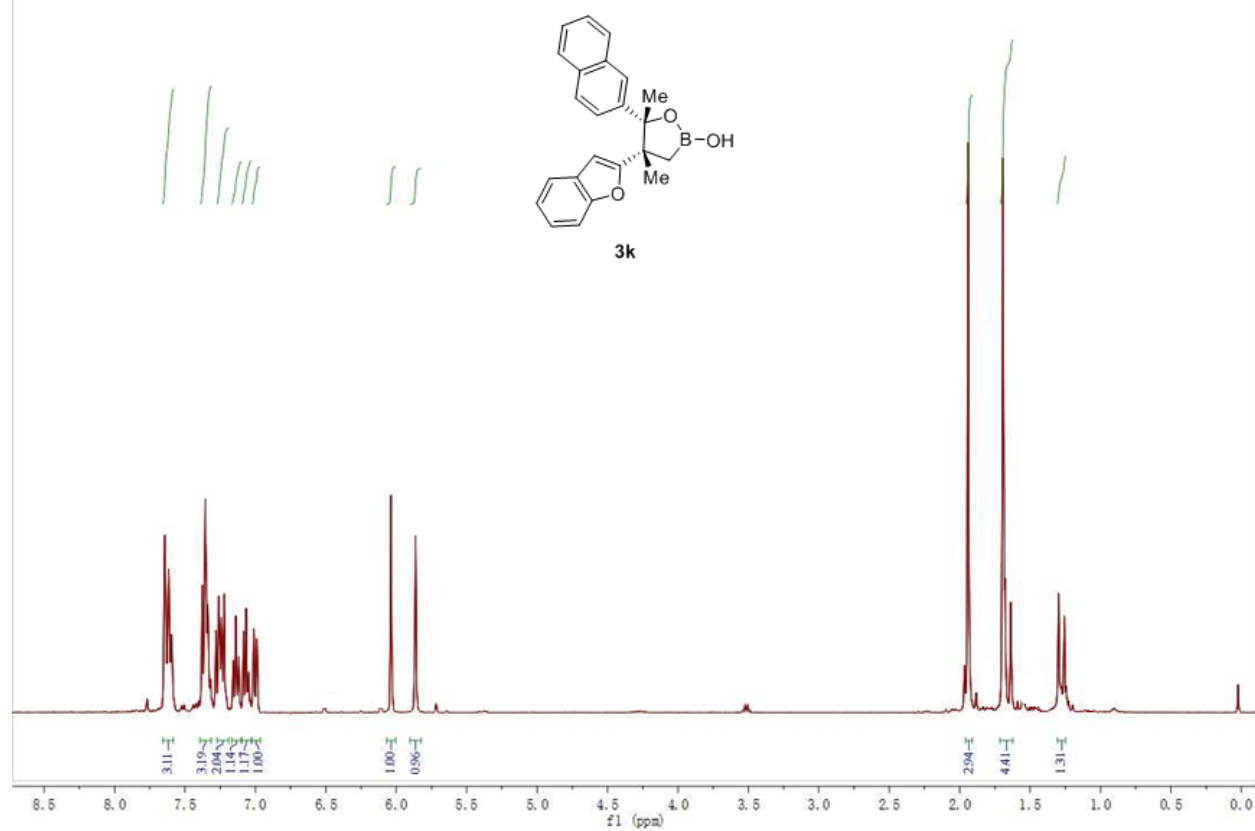CFC-4-96-A2-C-3  
Std carbon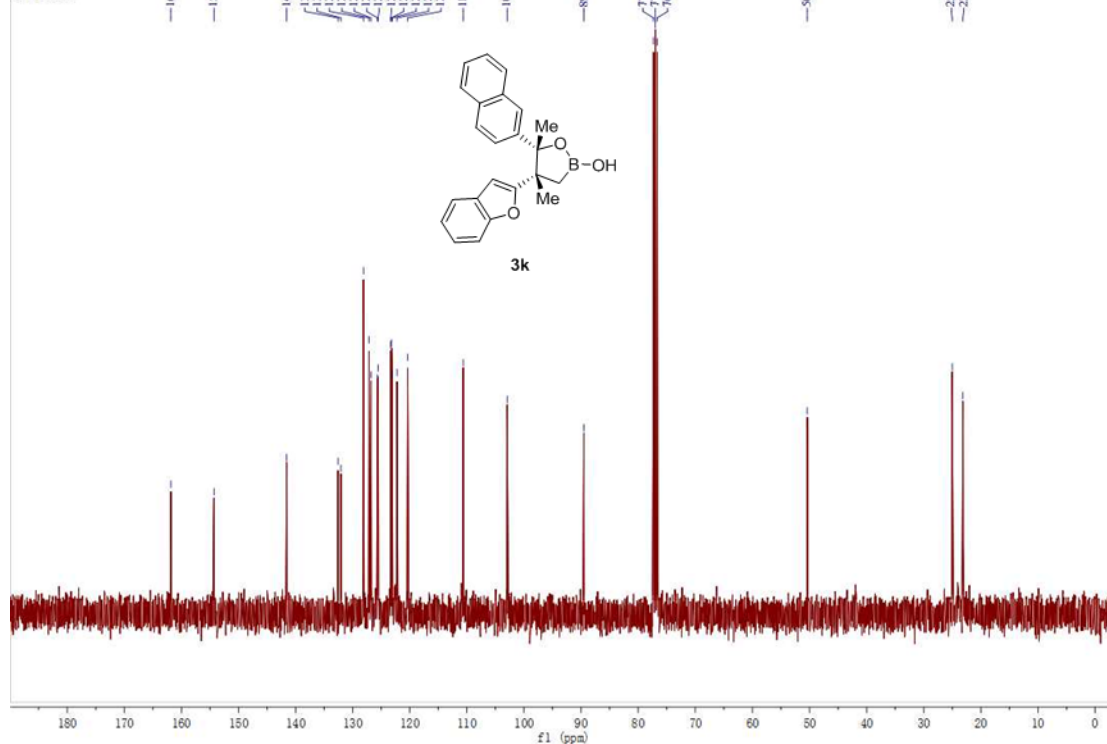

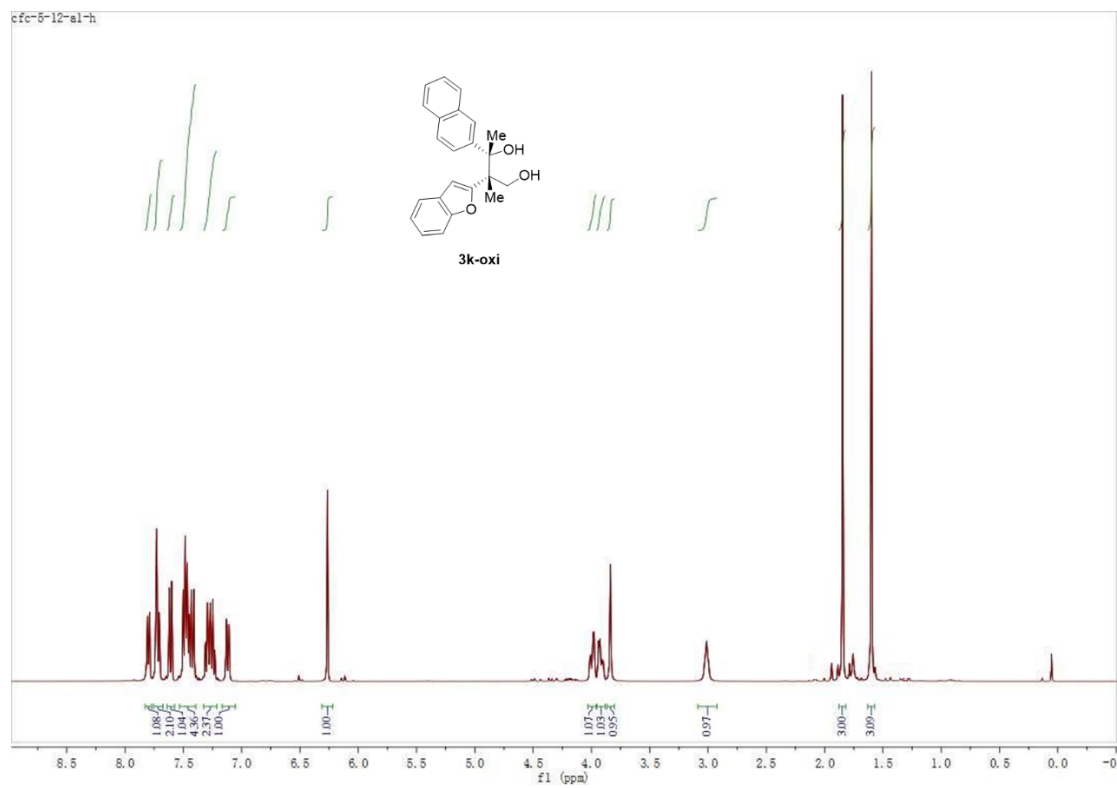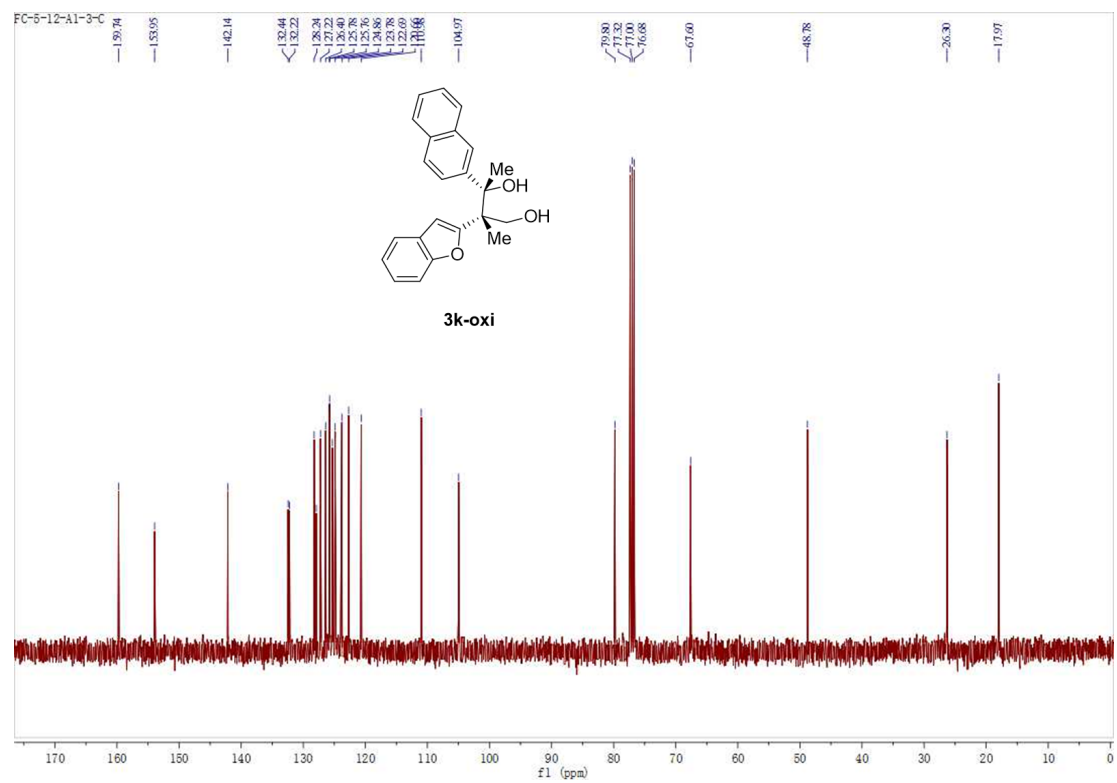

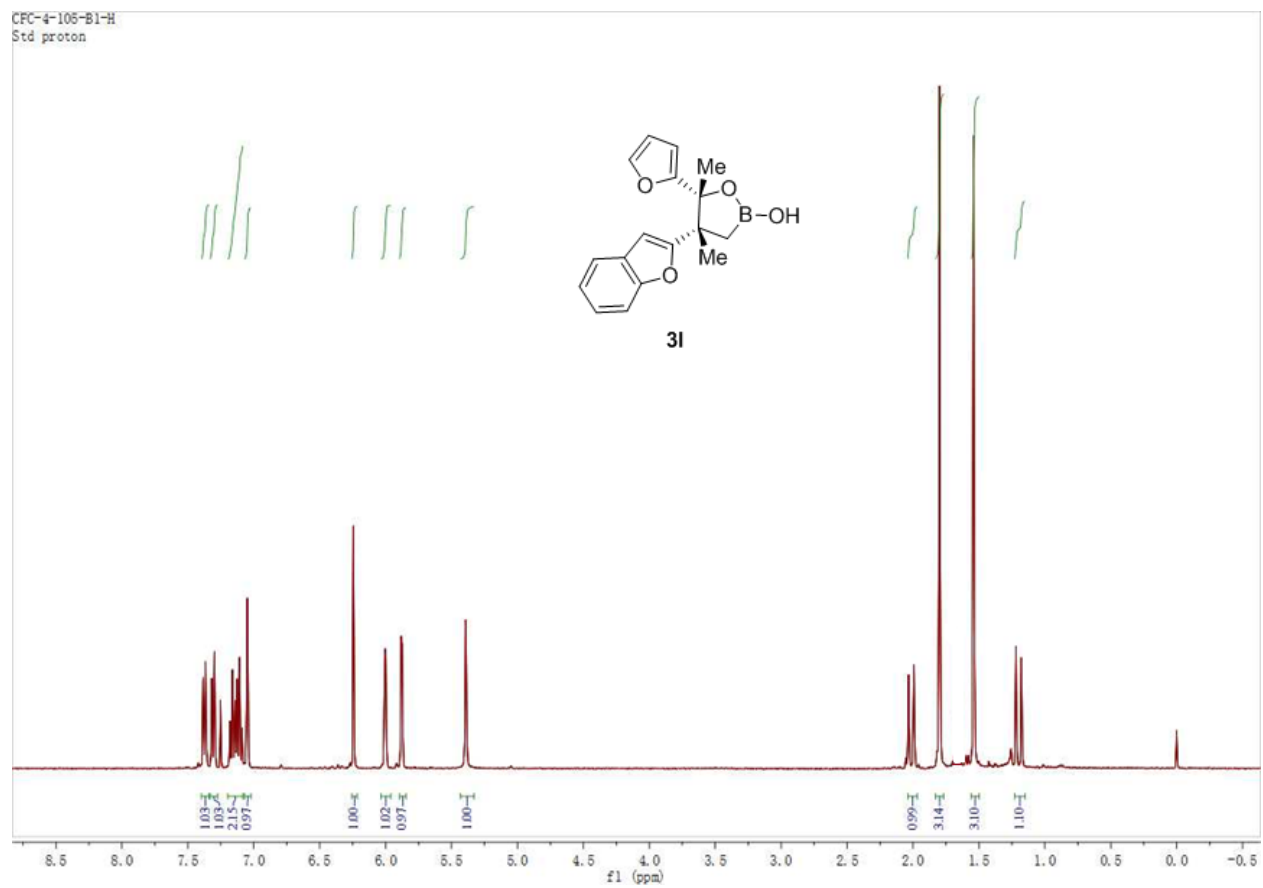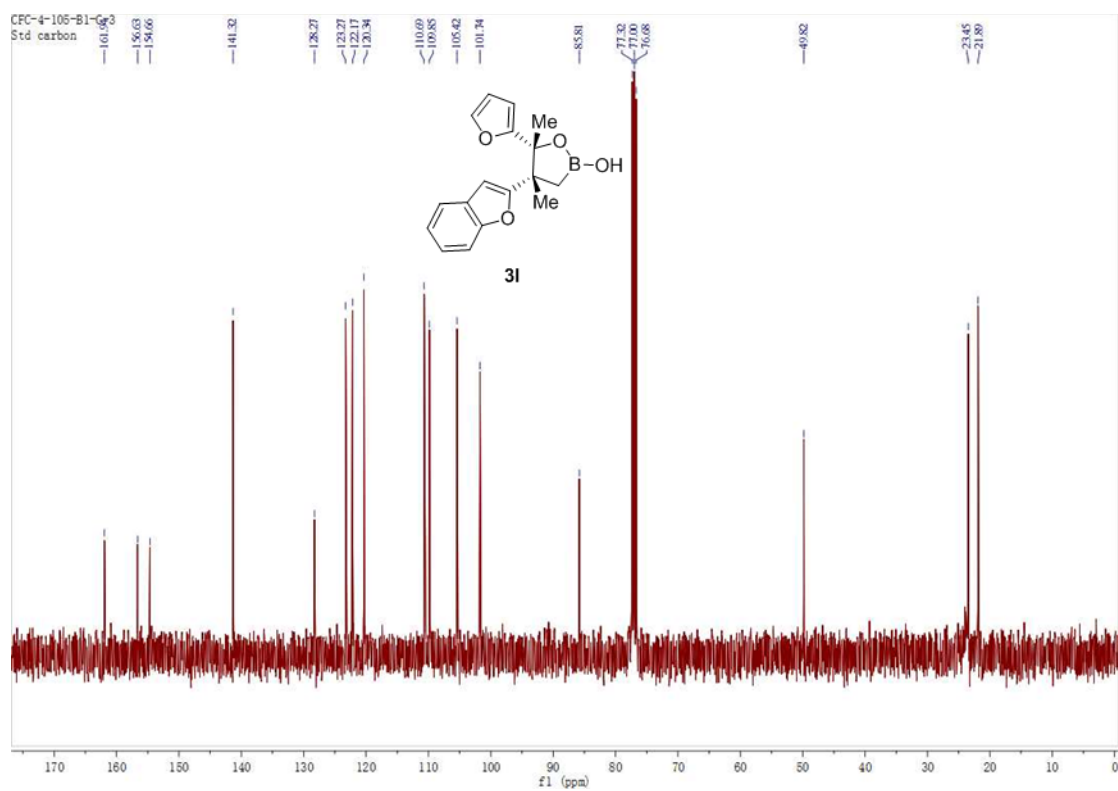

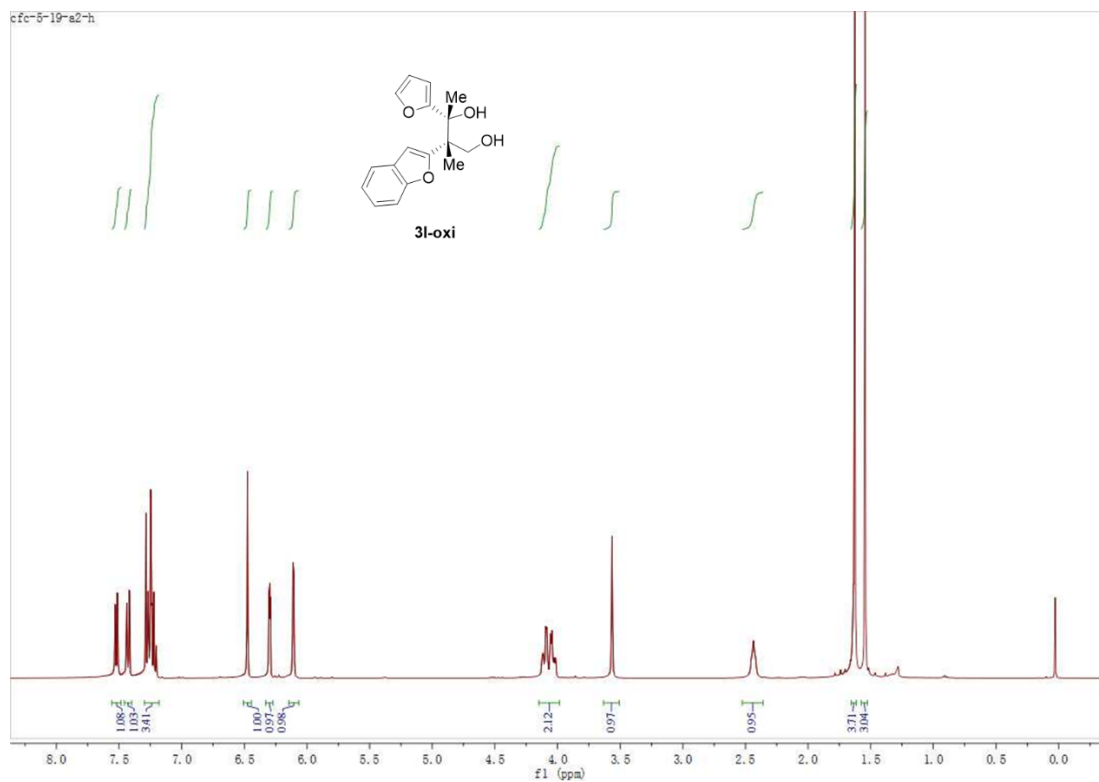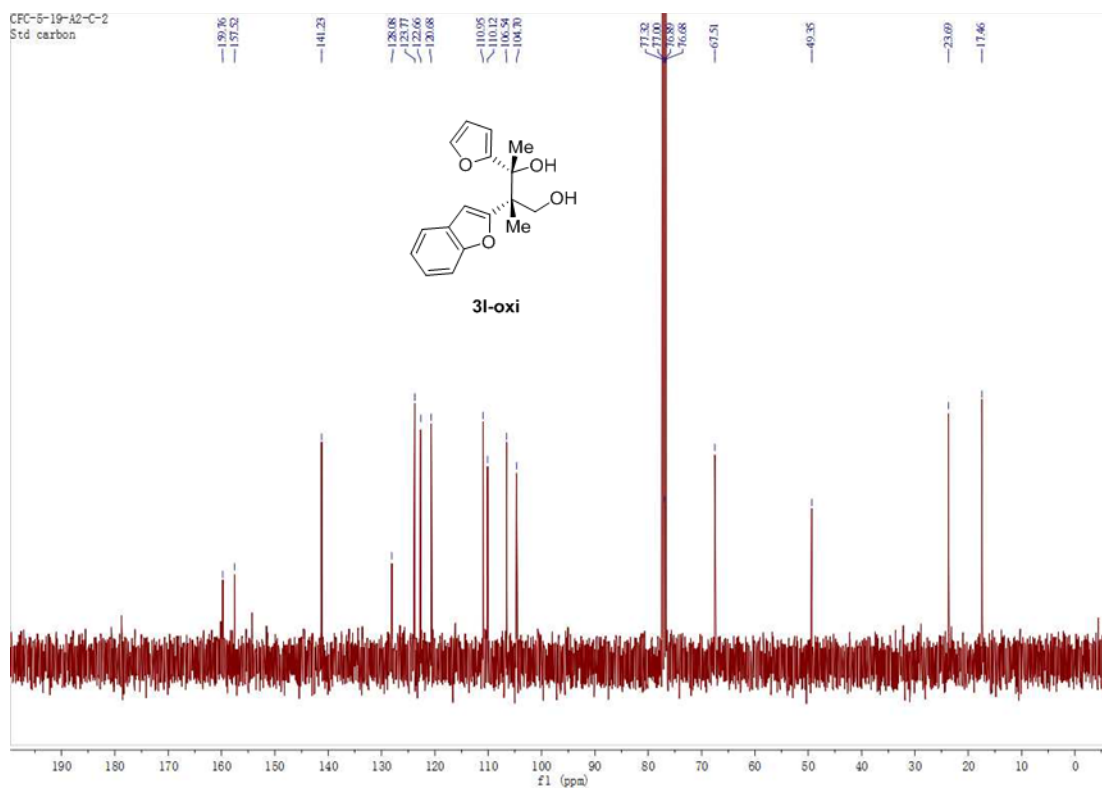

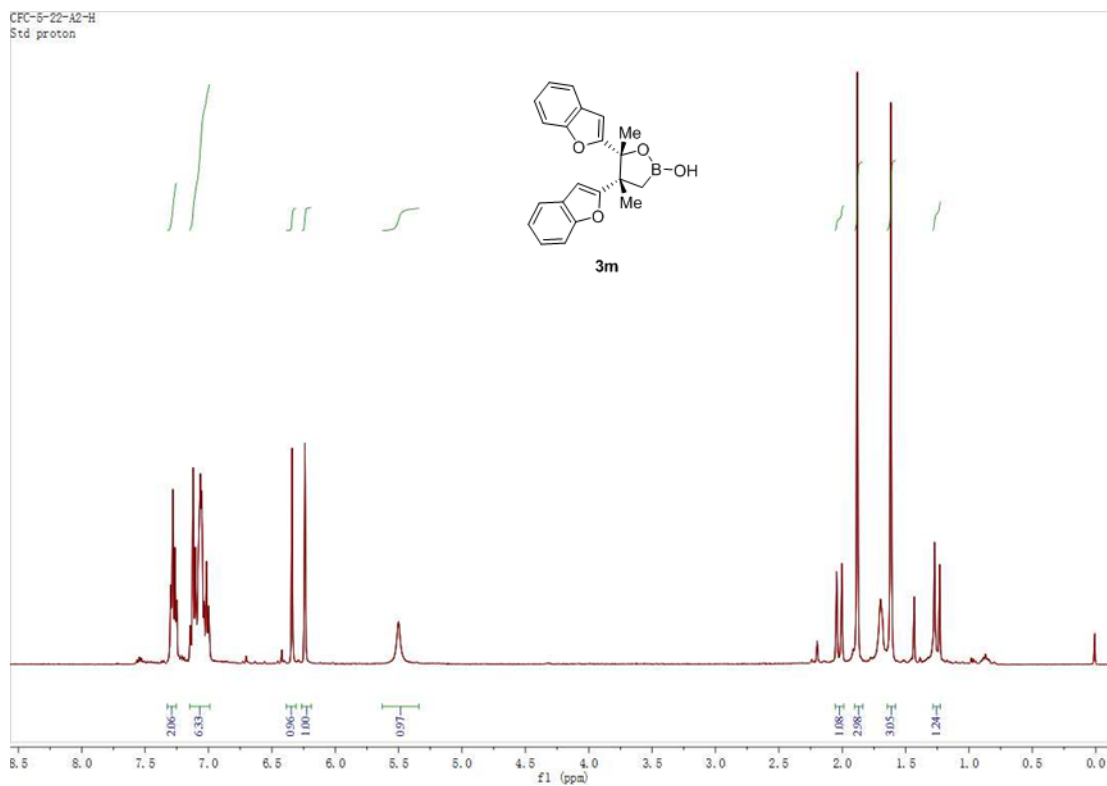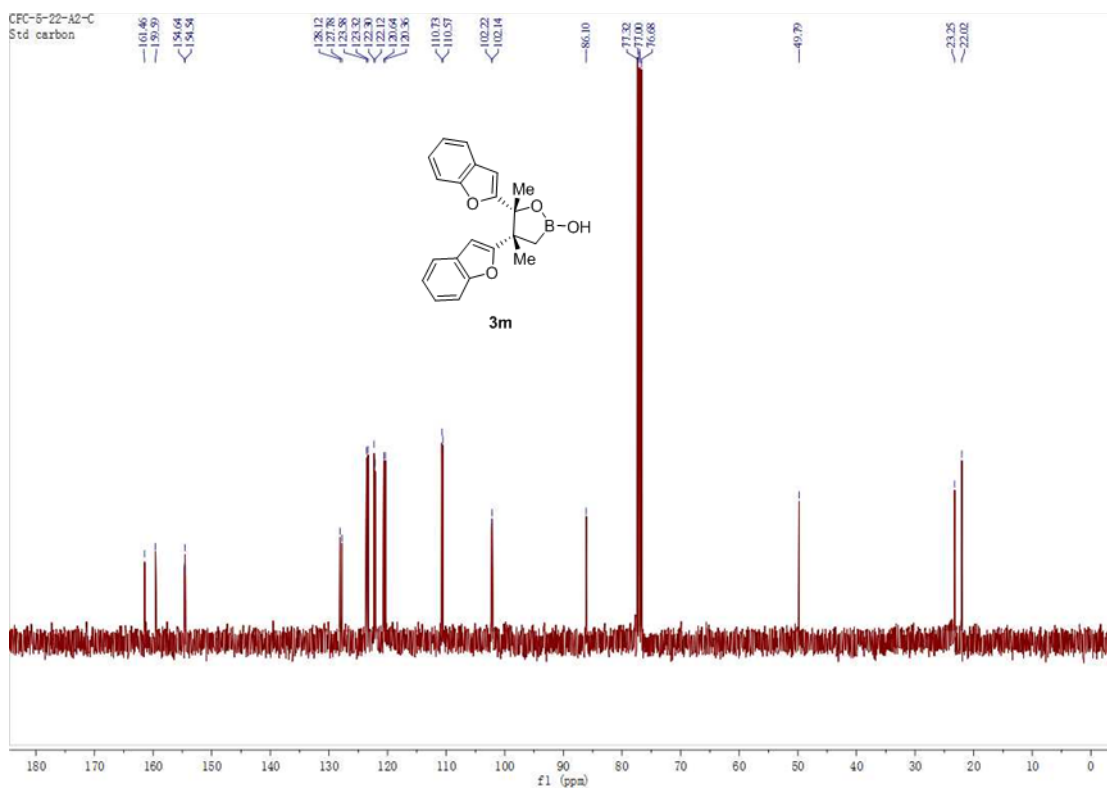



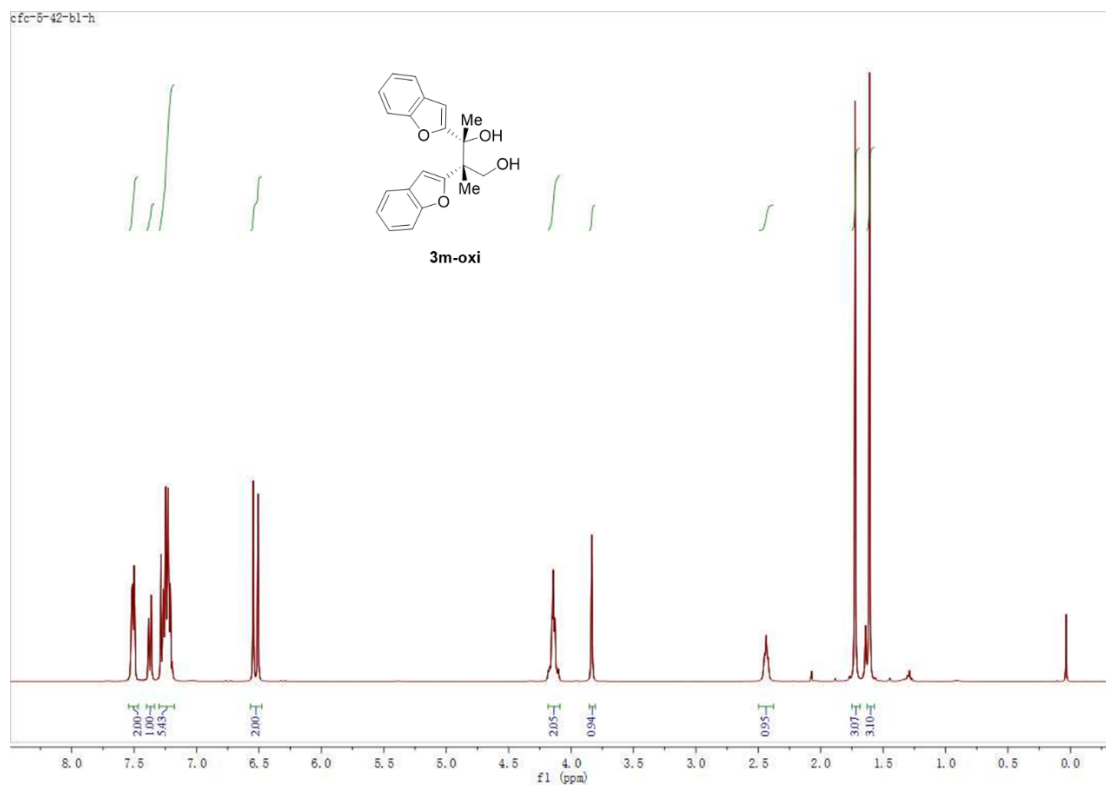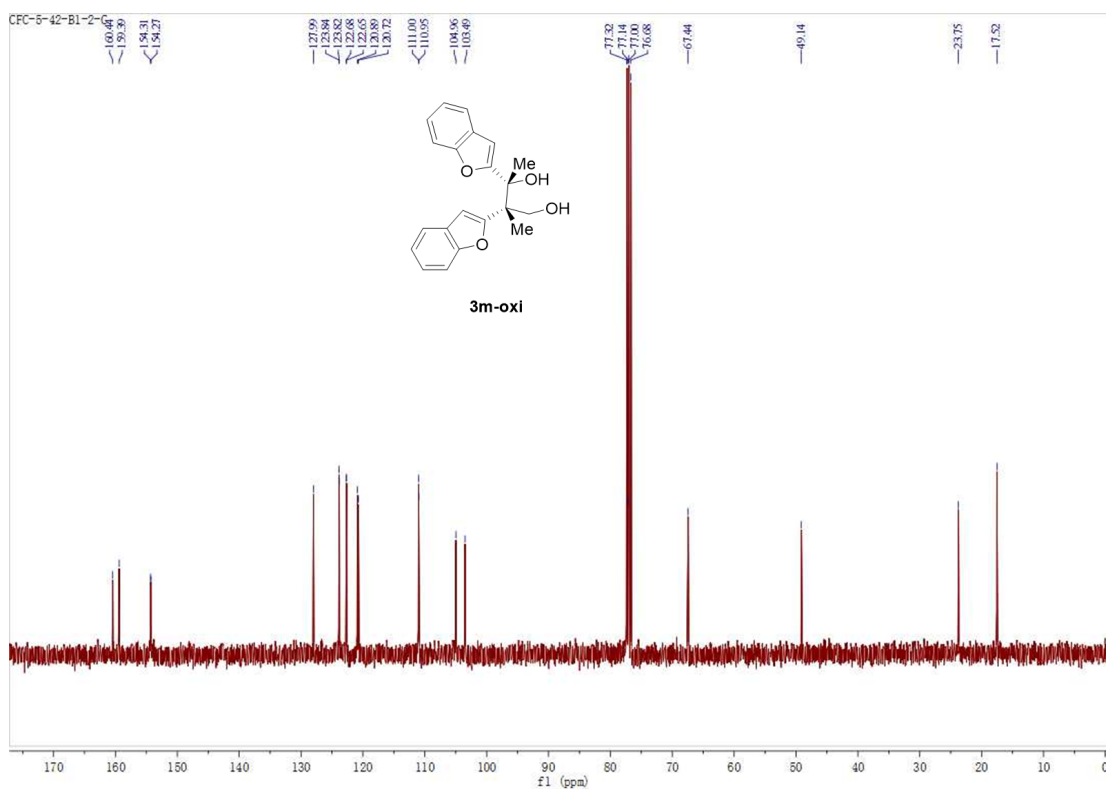

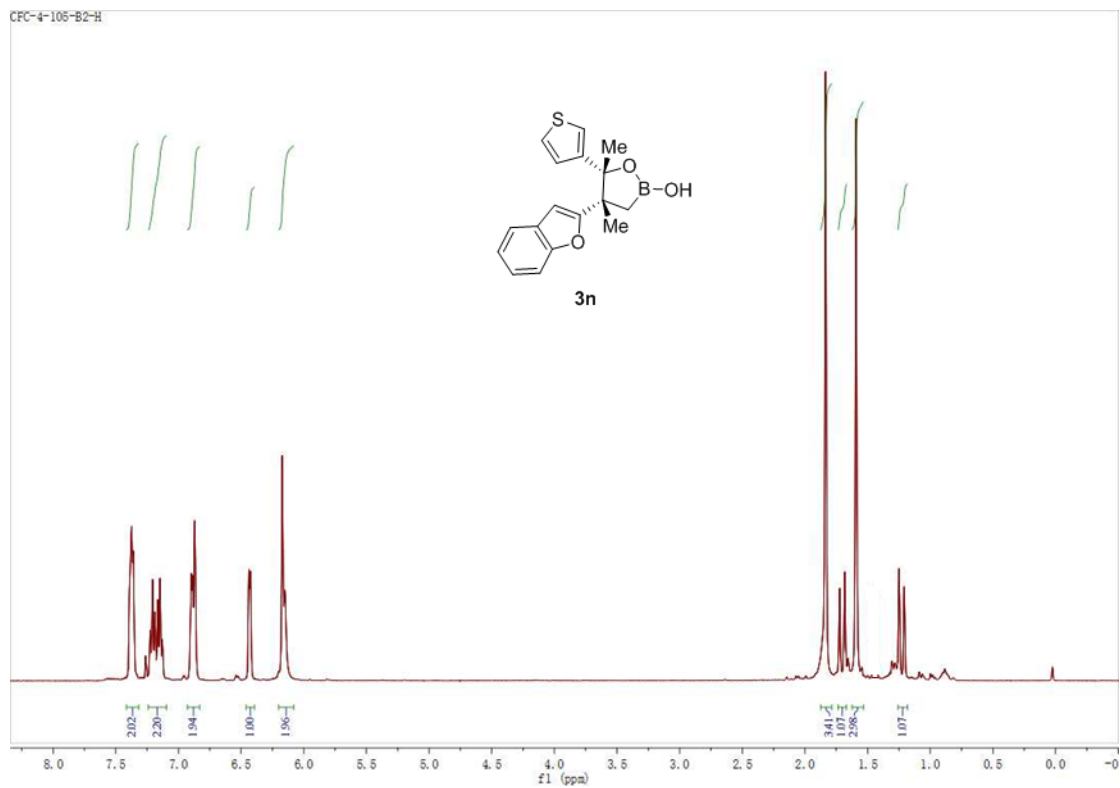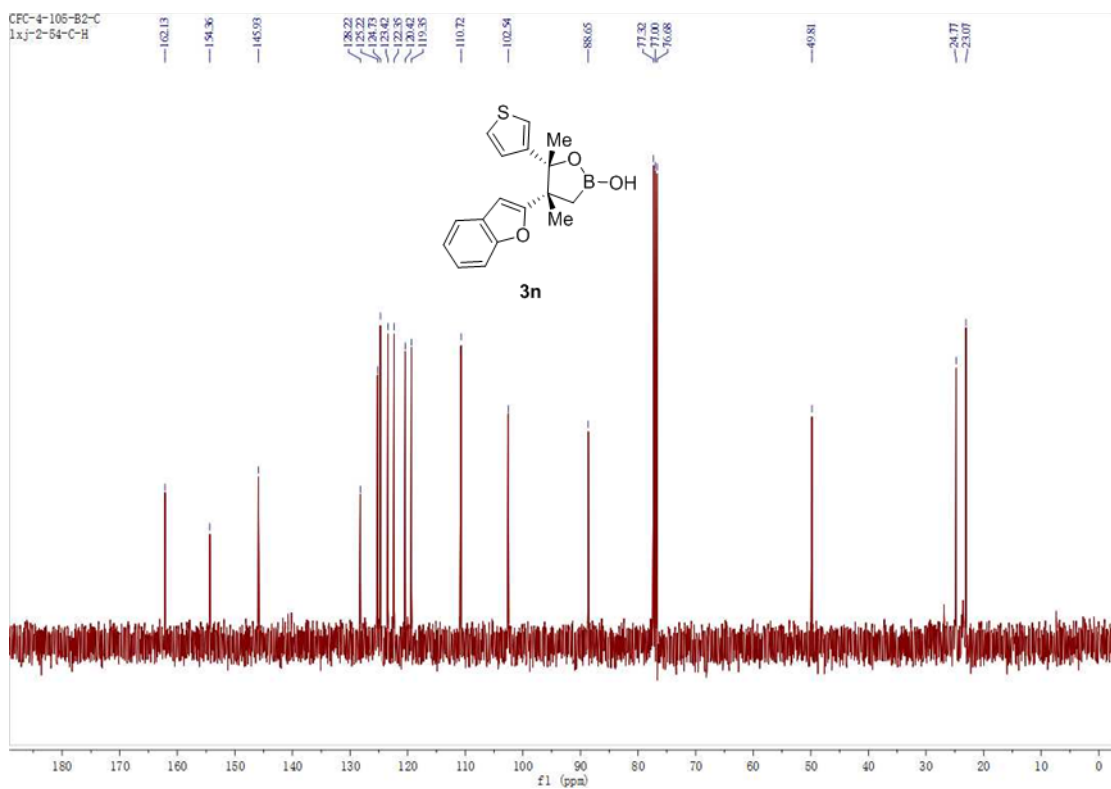

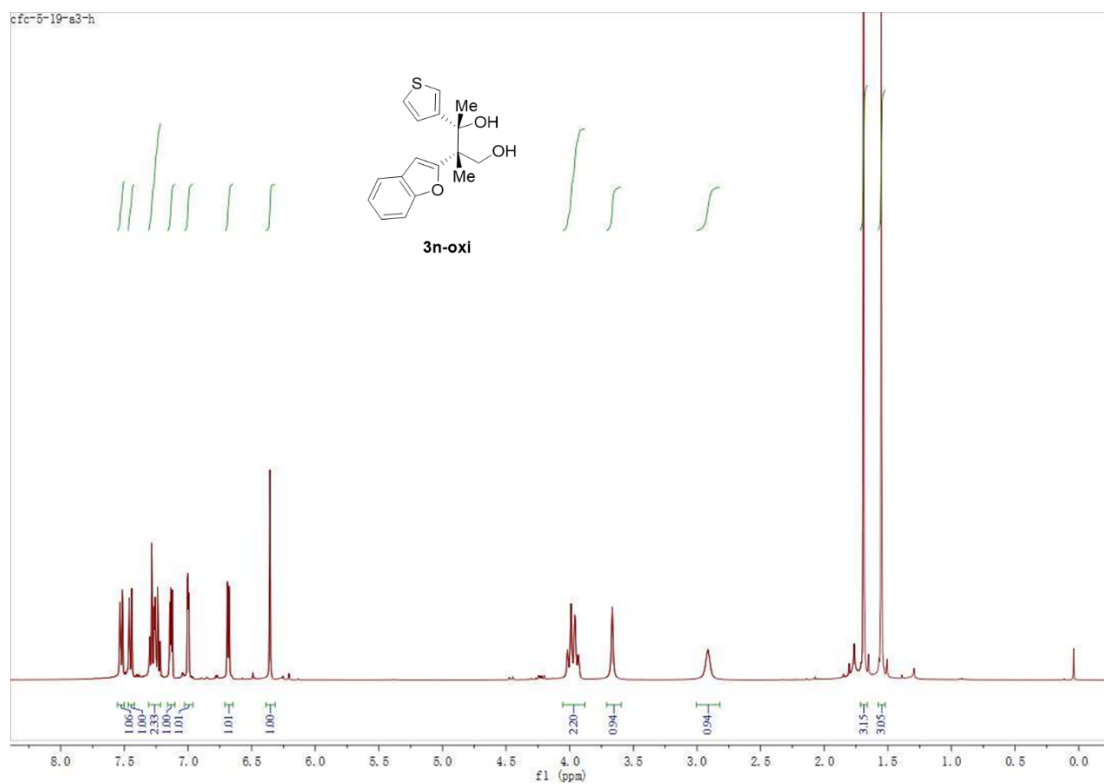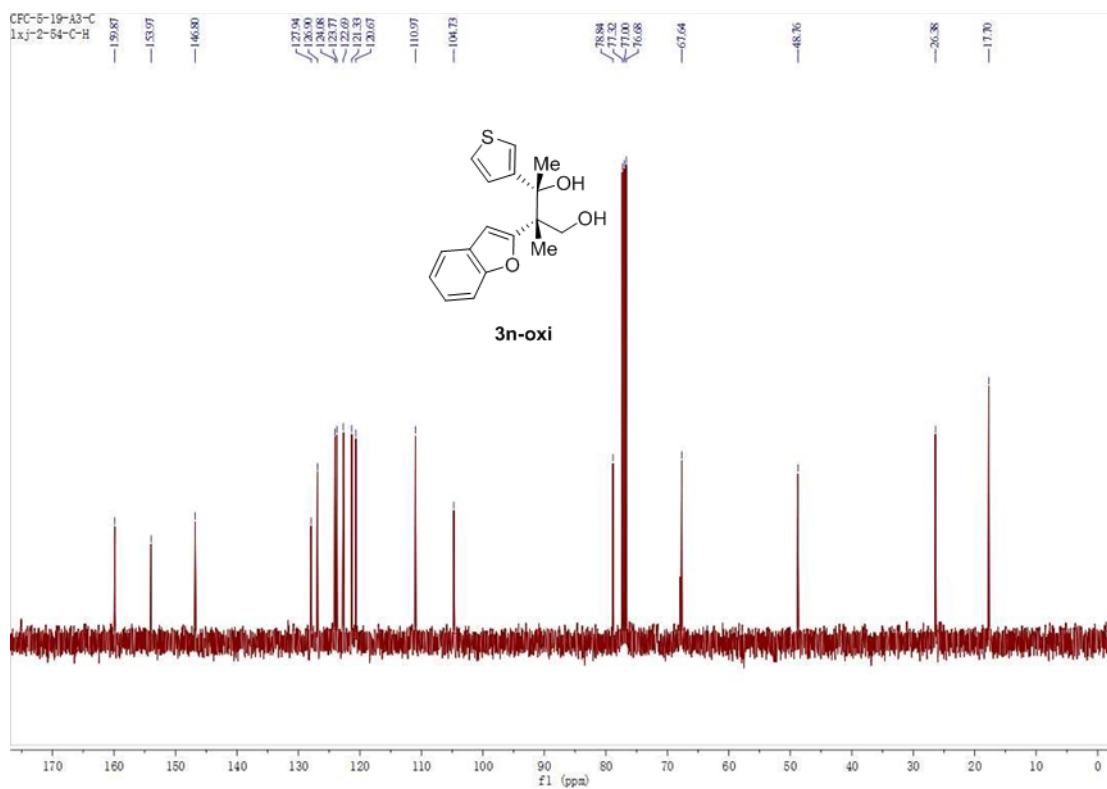

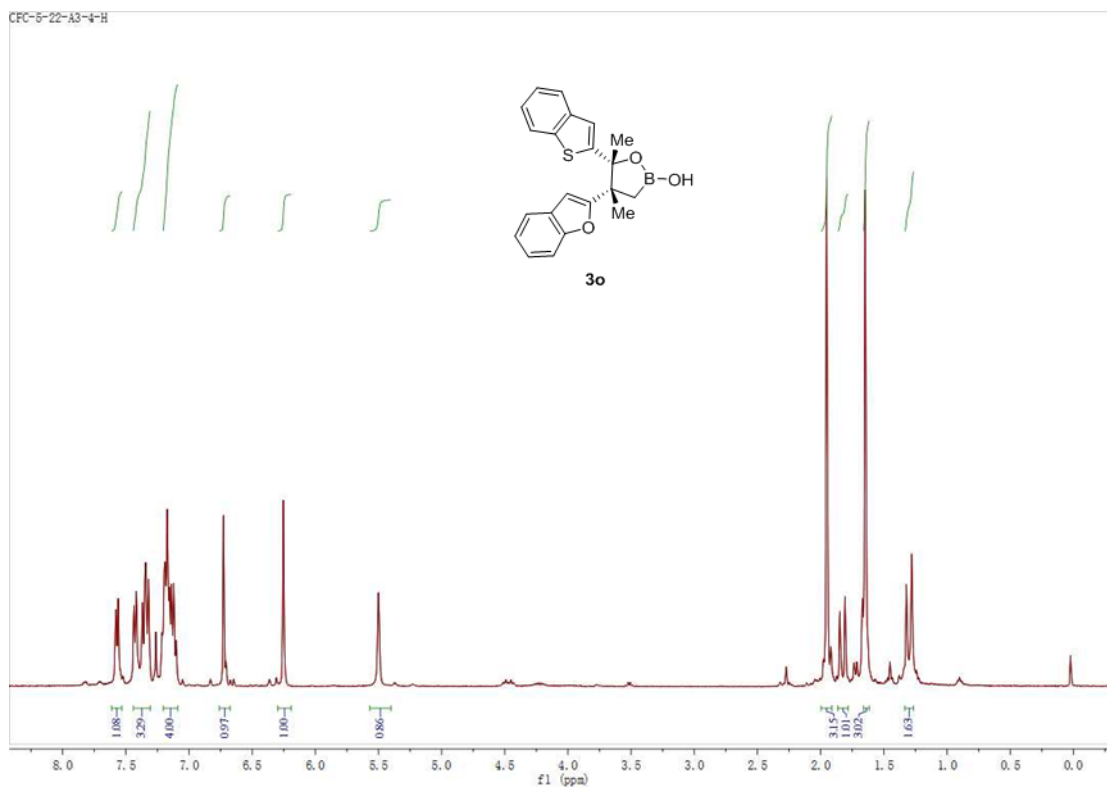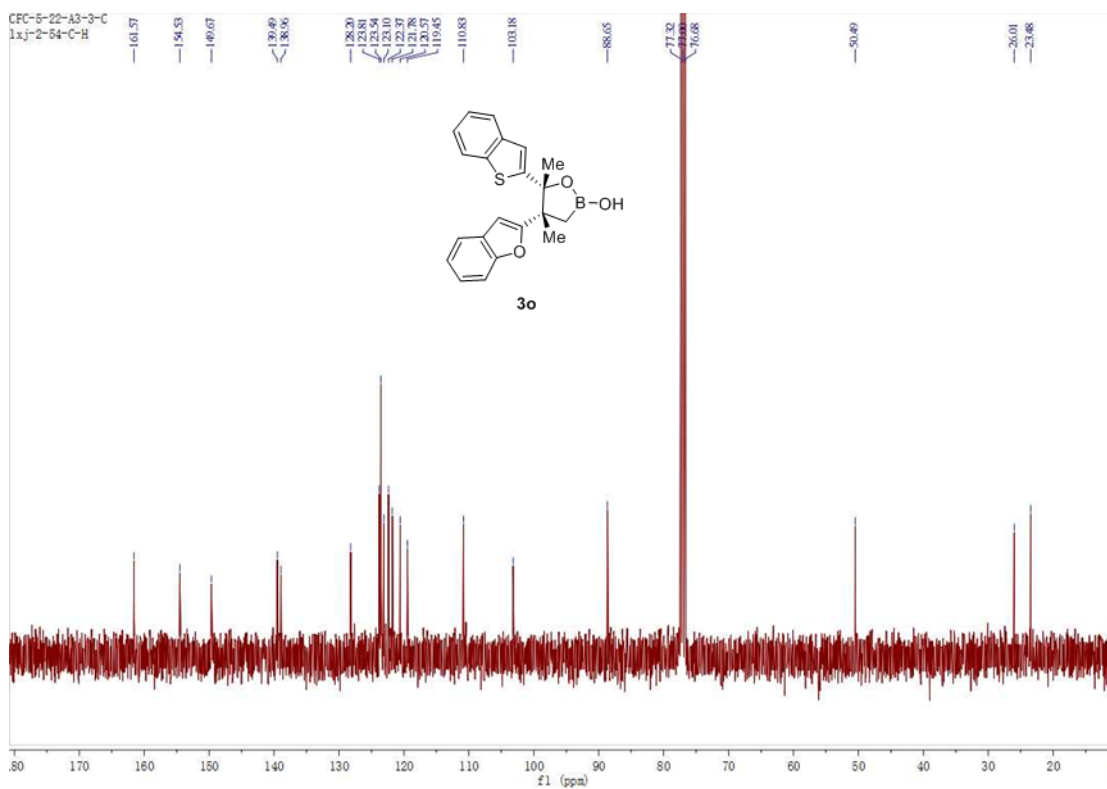

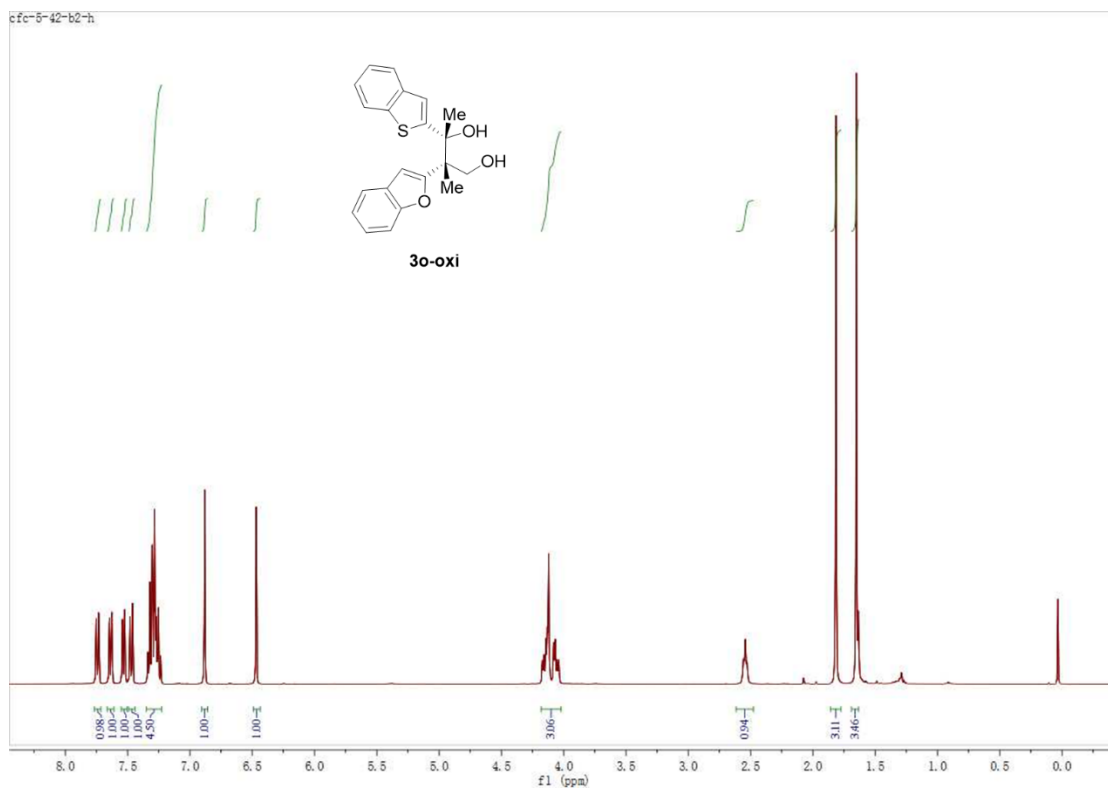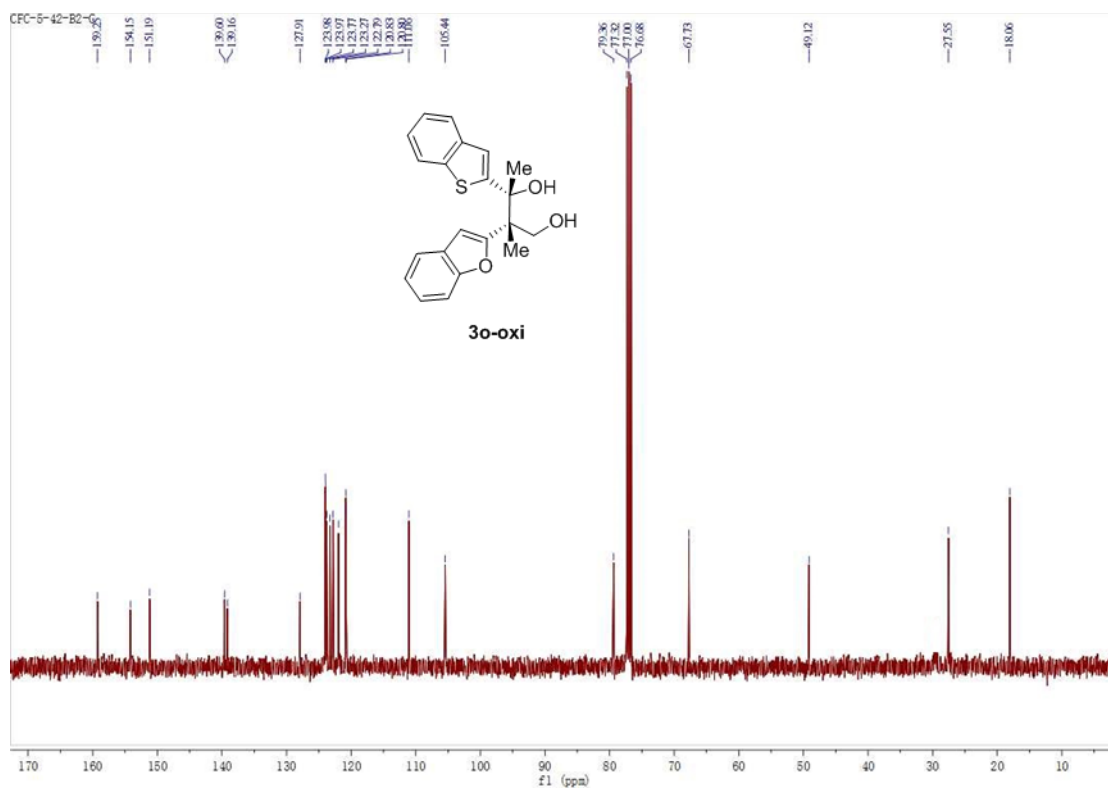

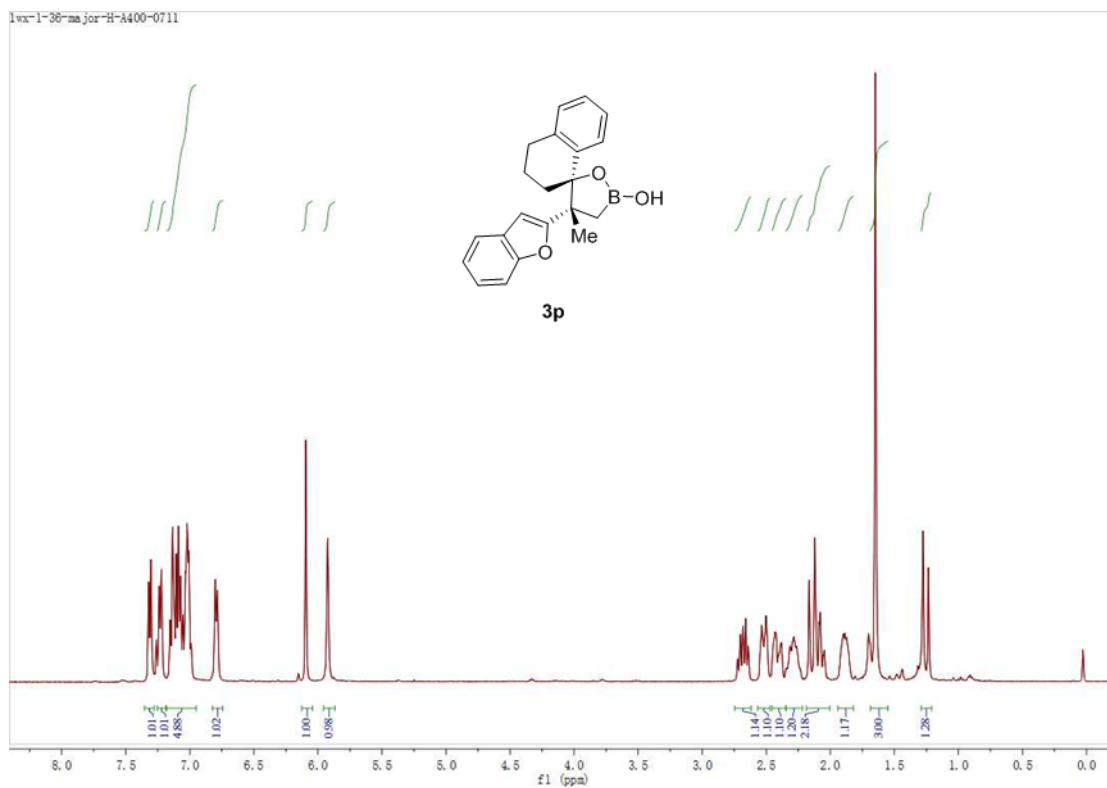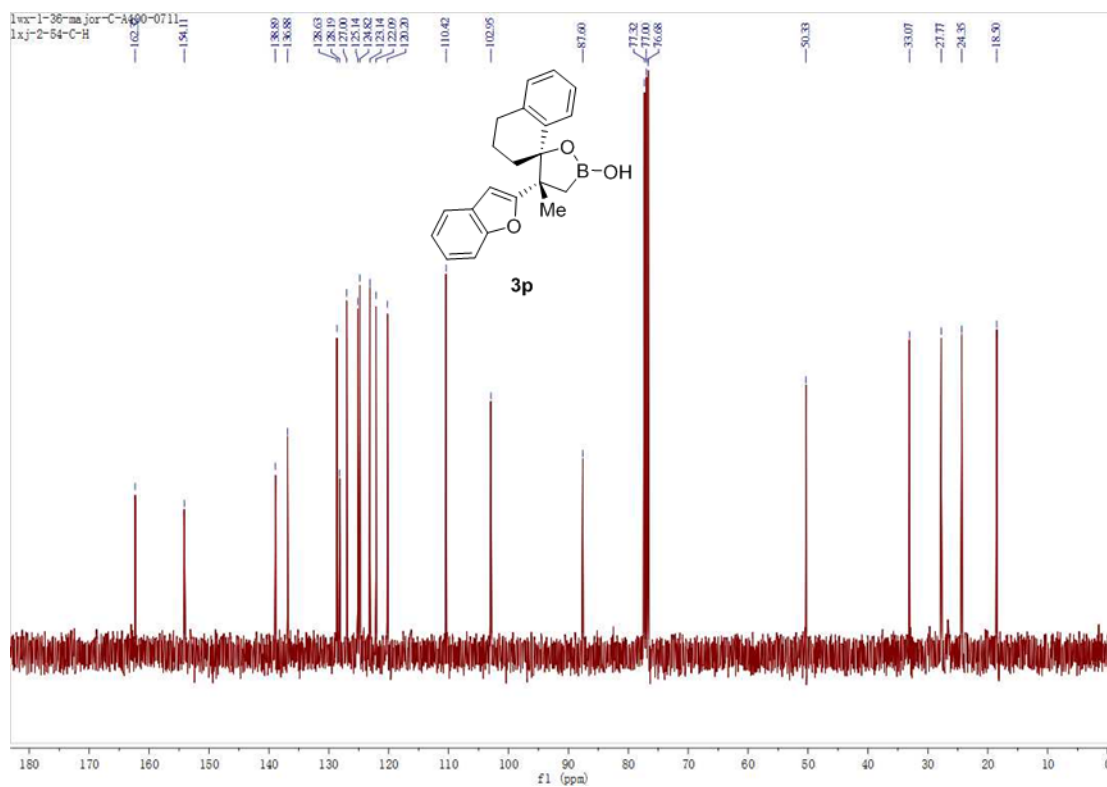

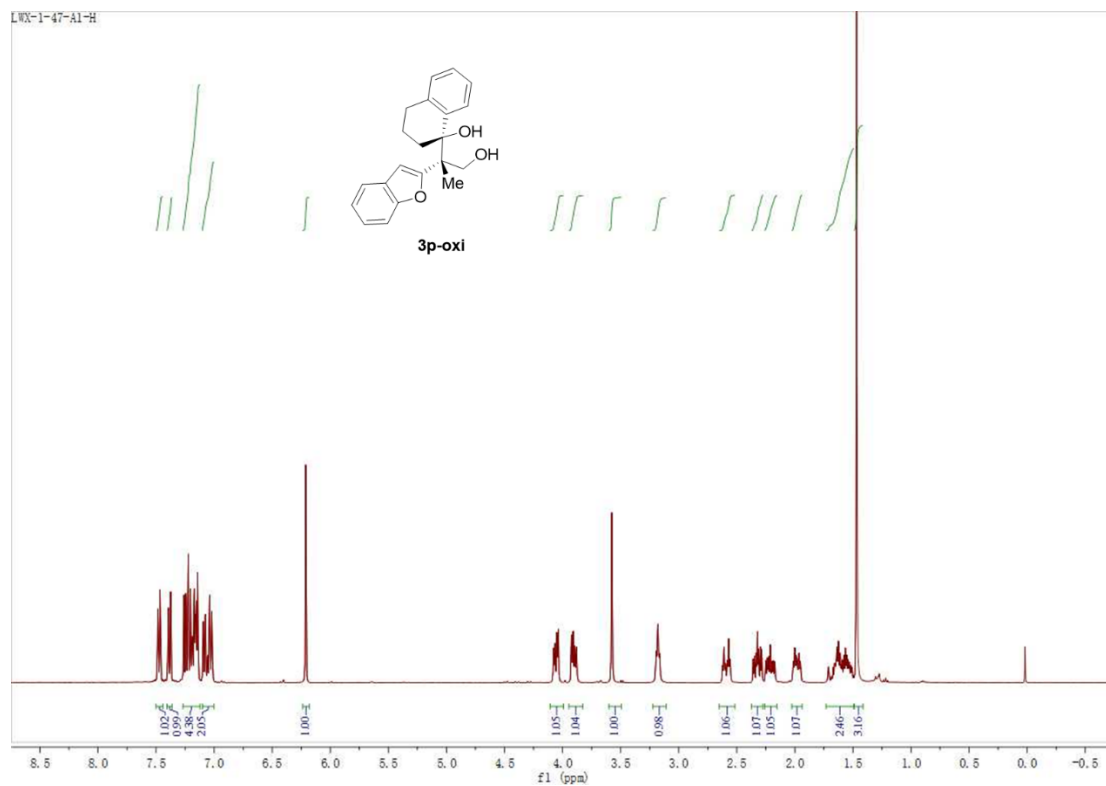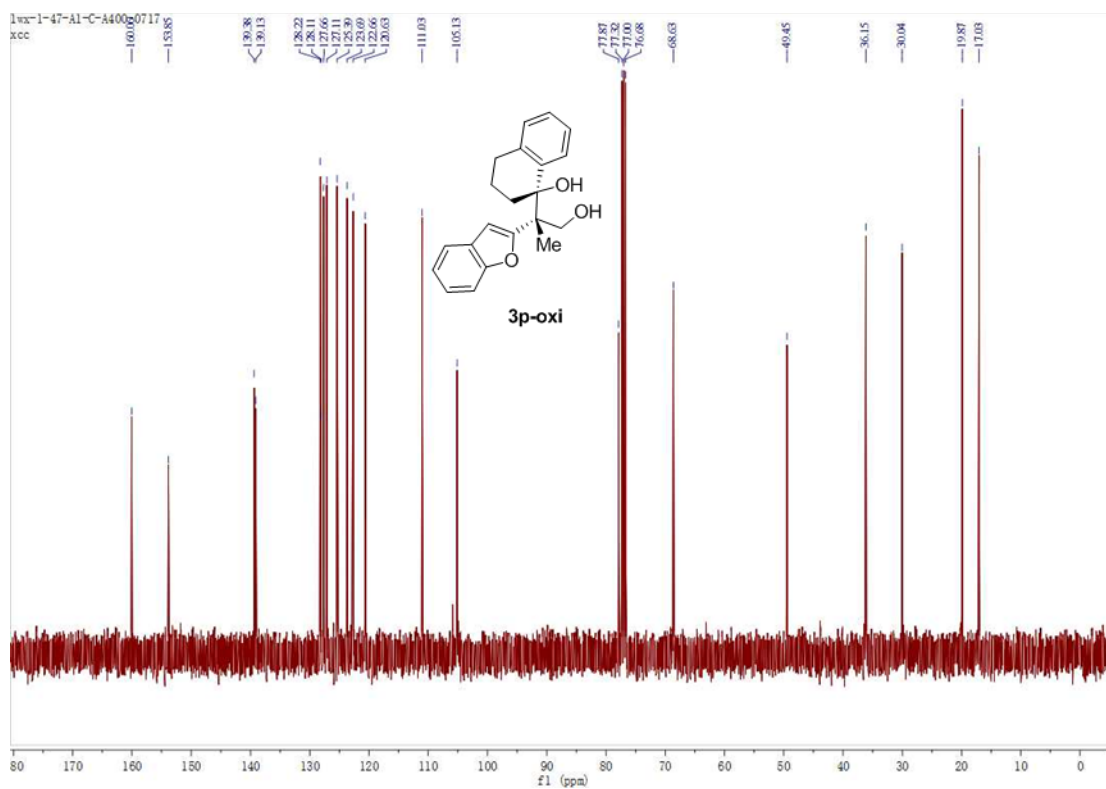

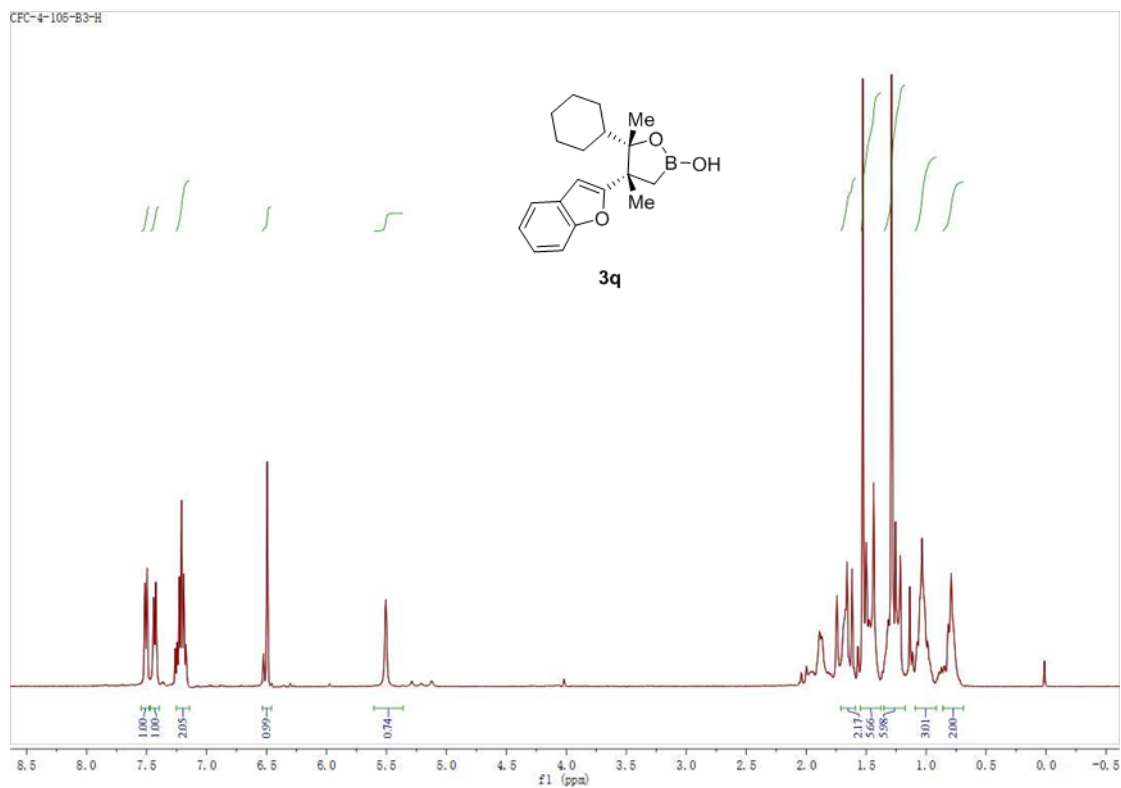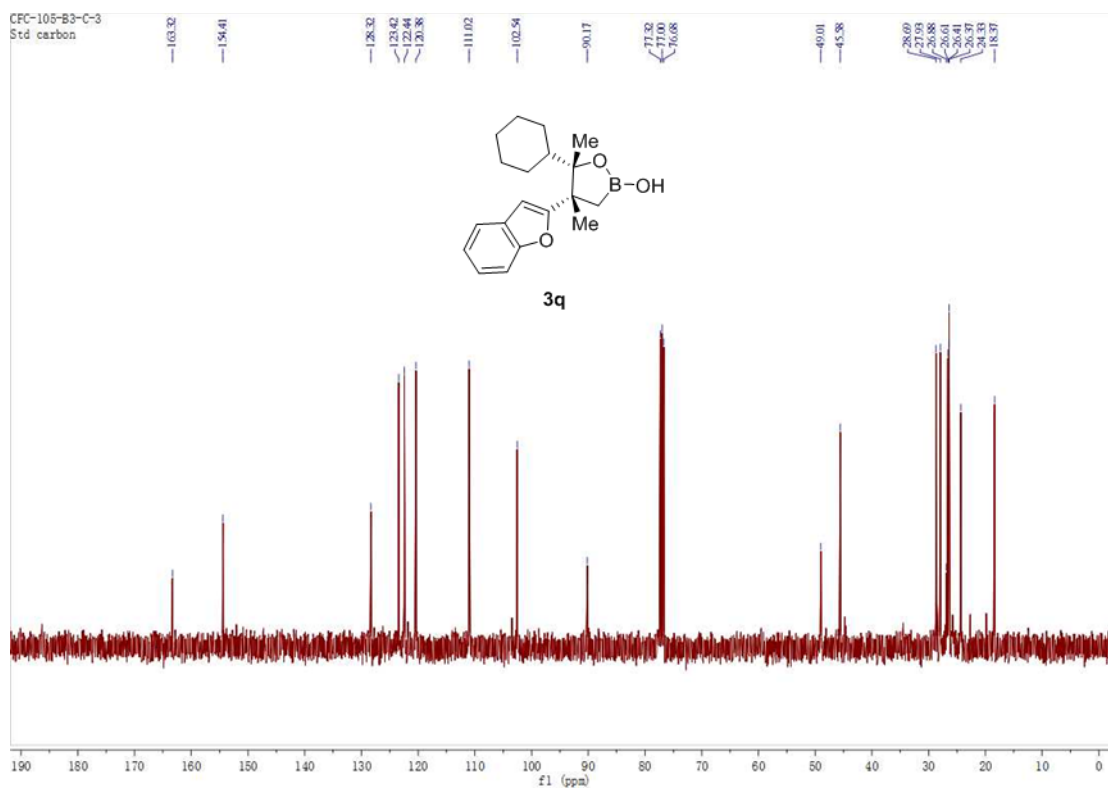



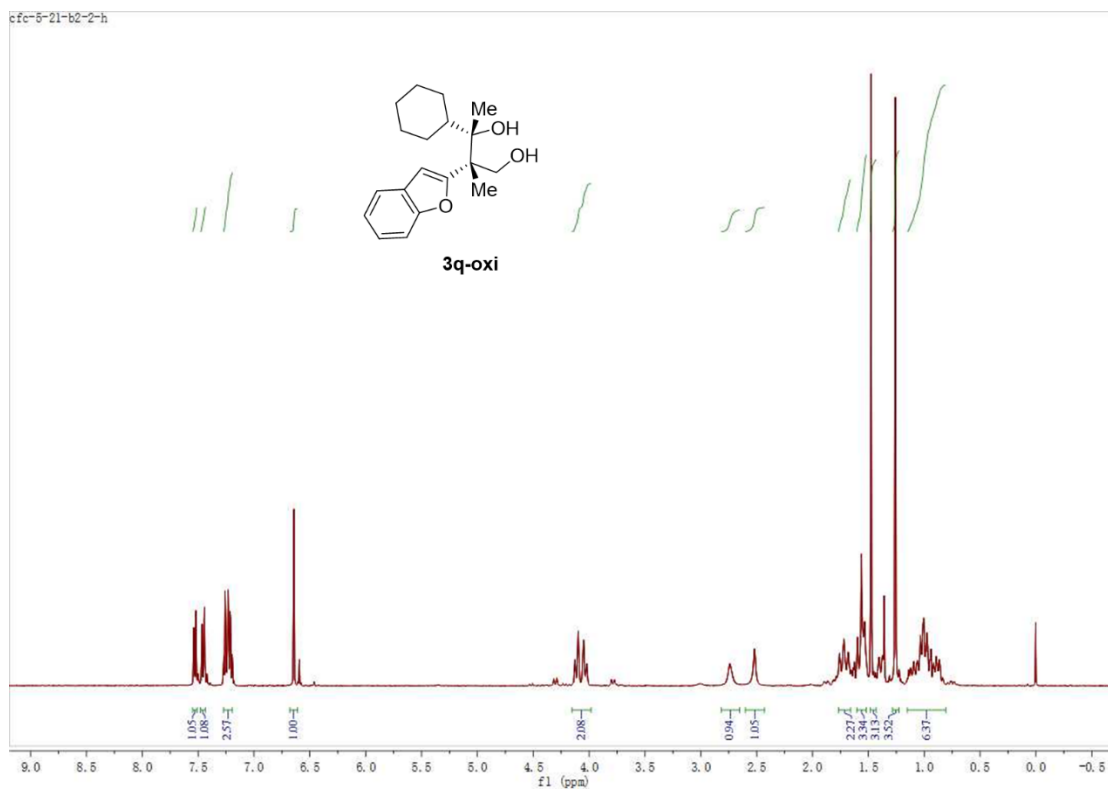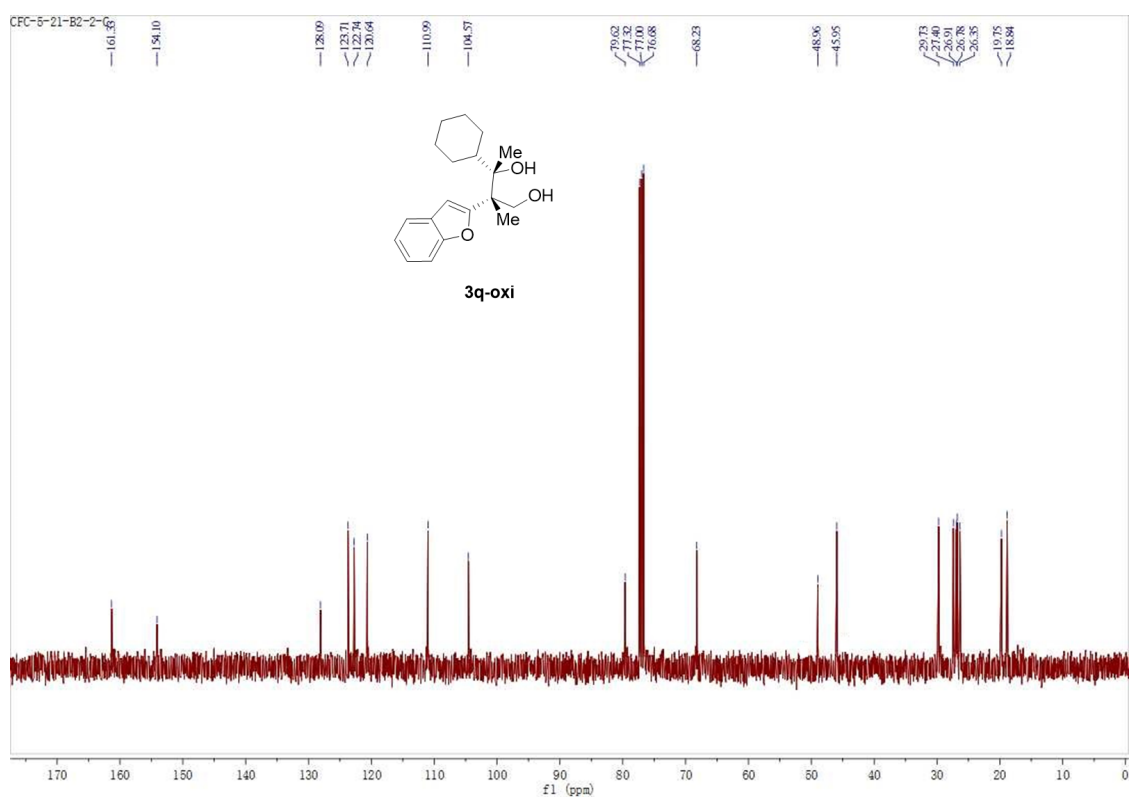

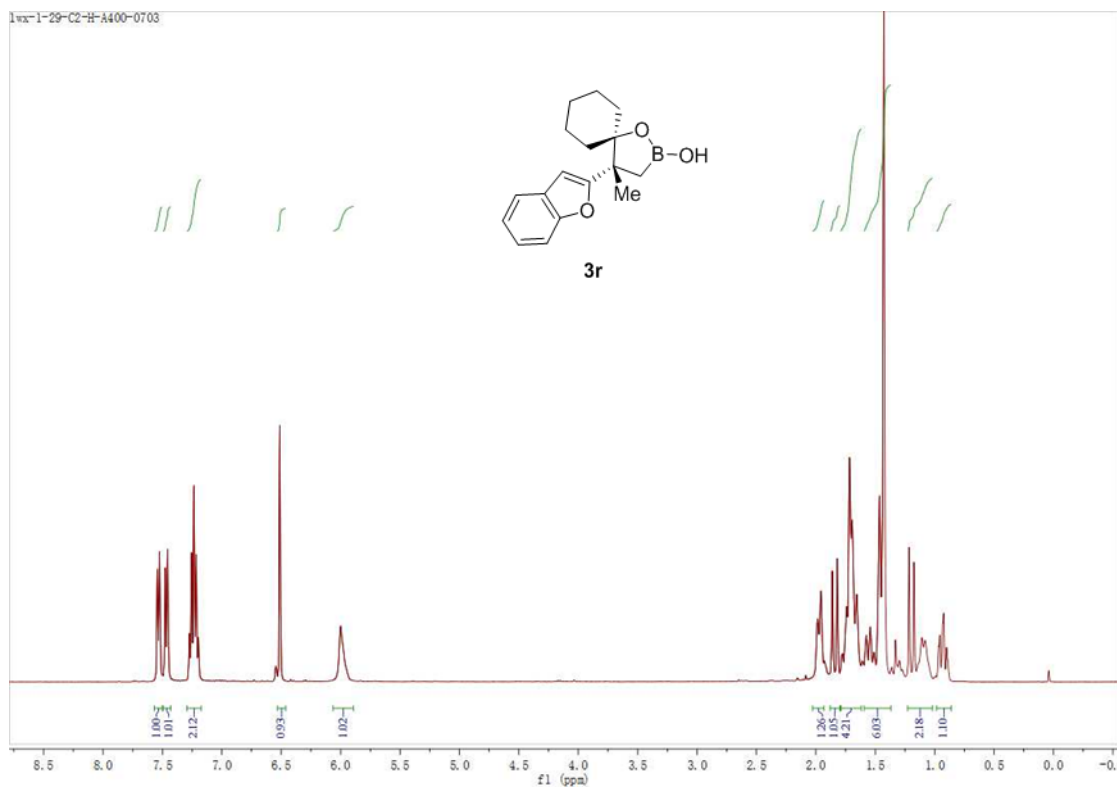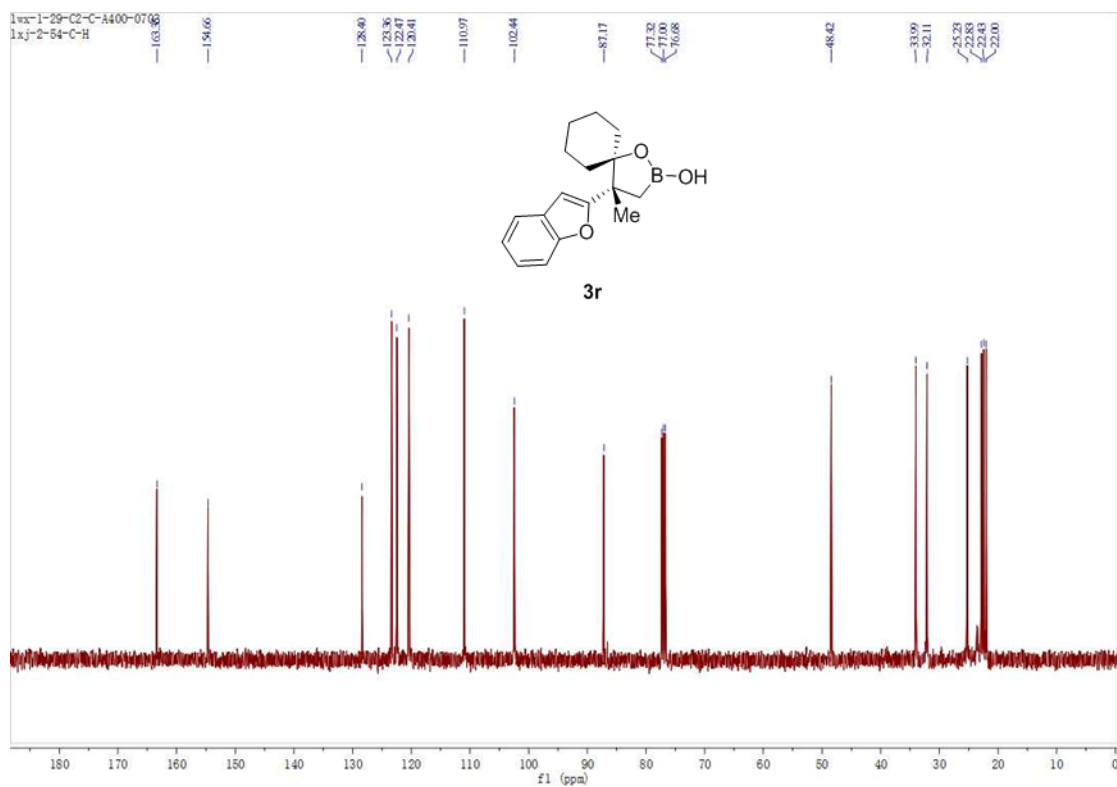

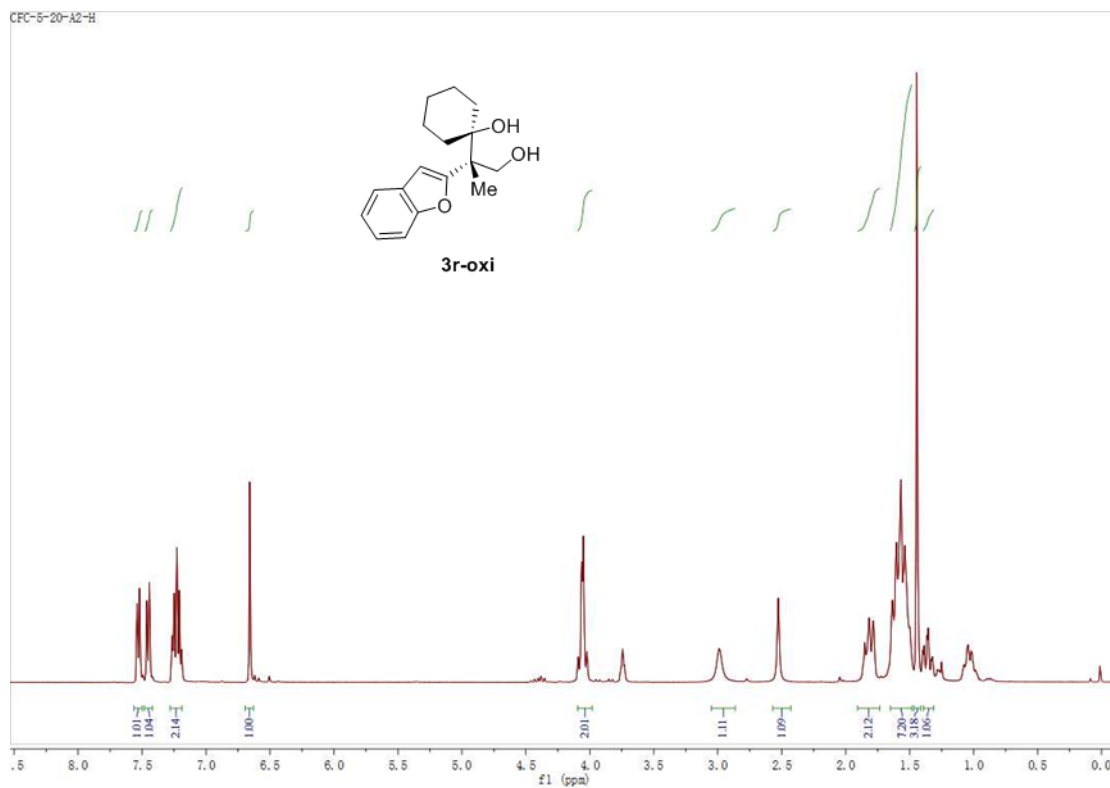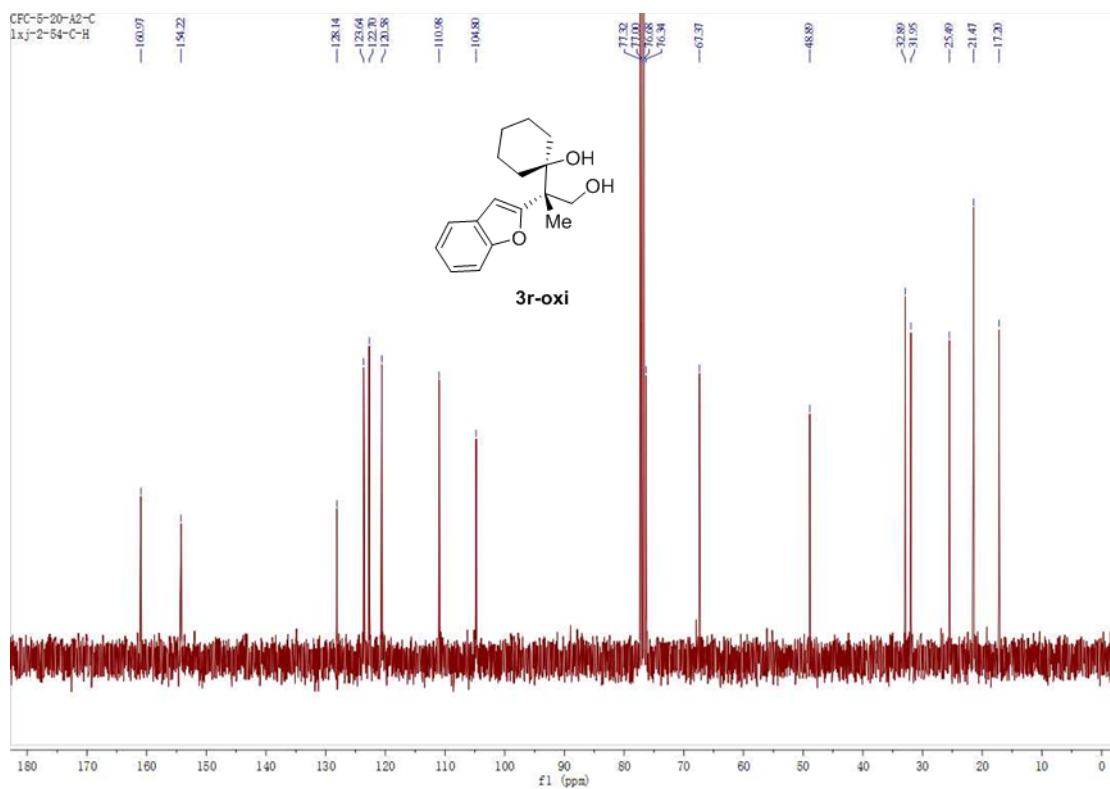

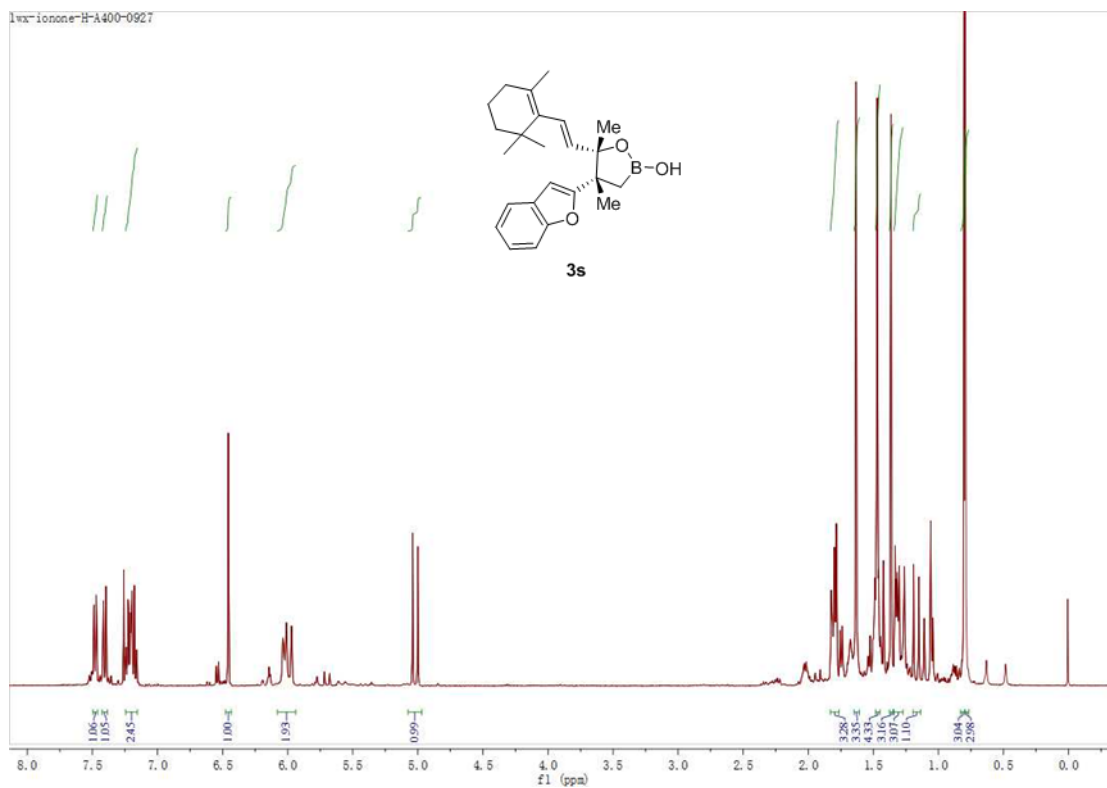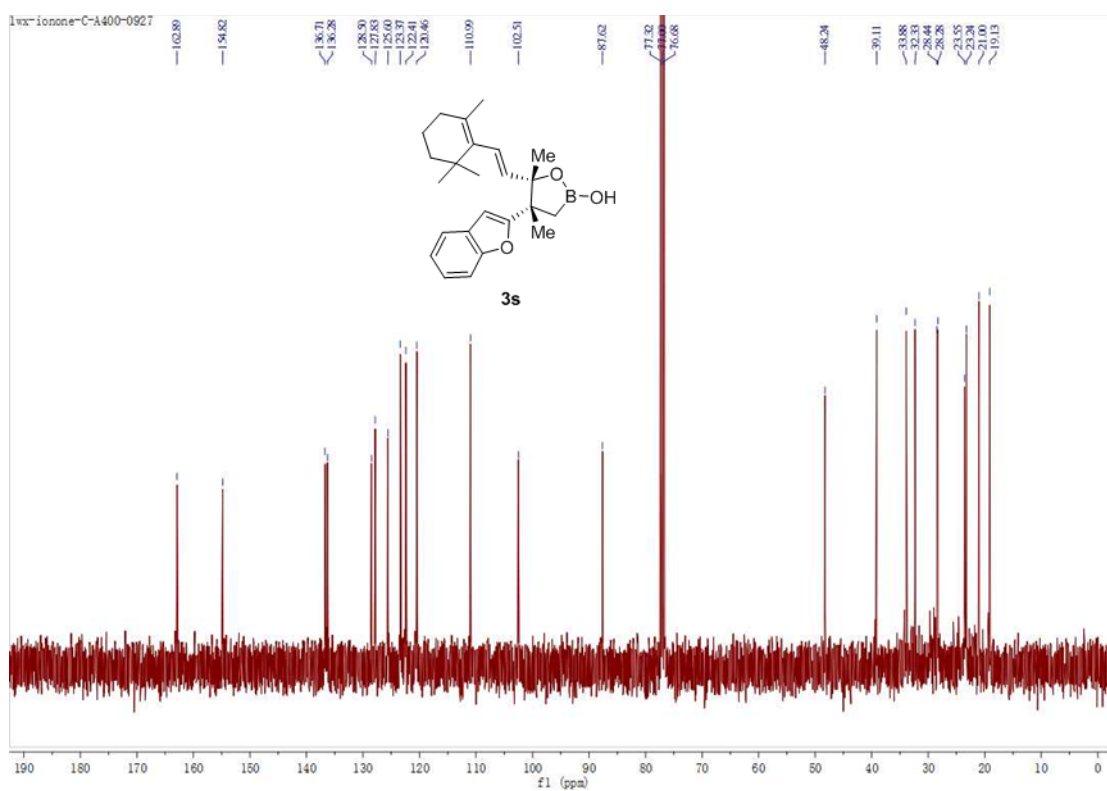

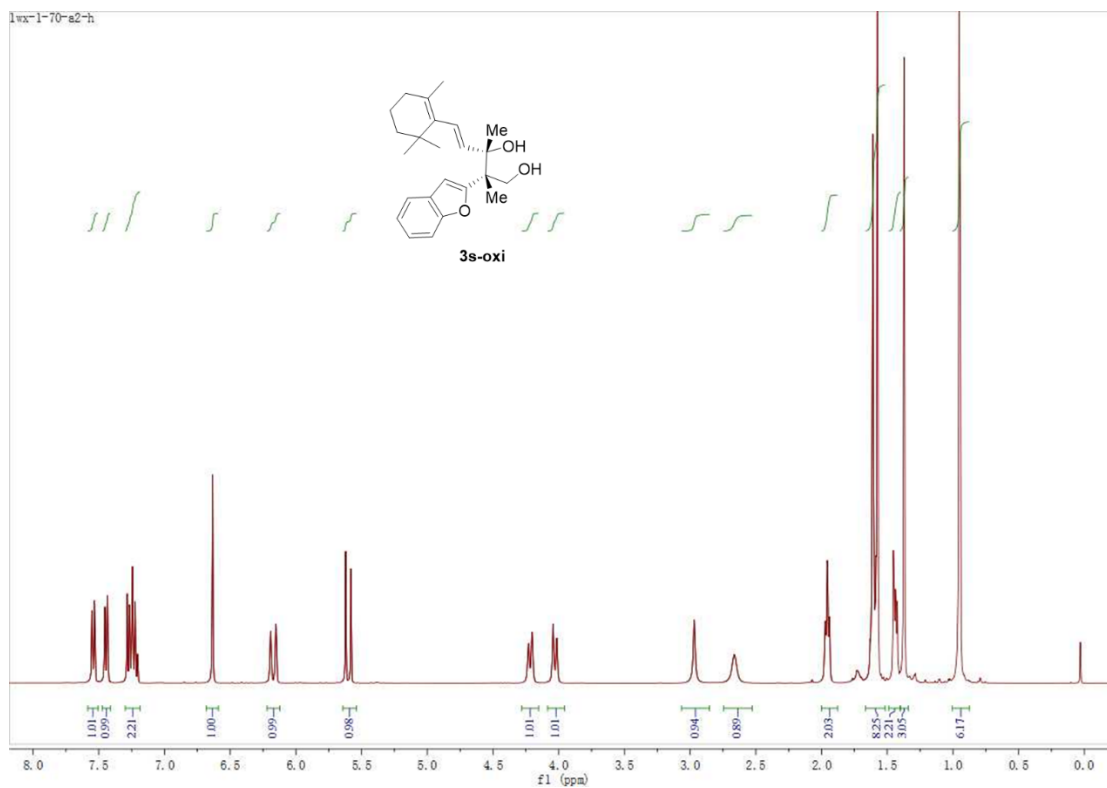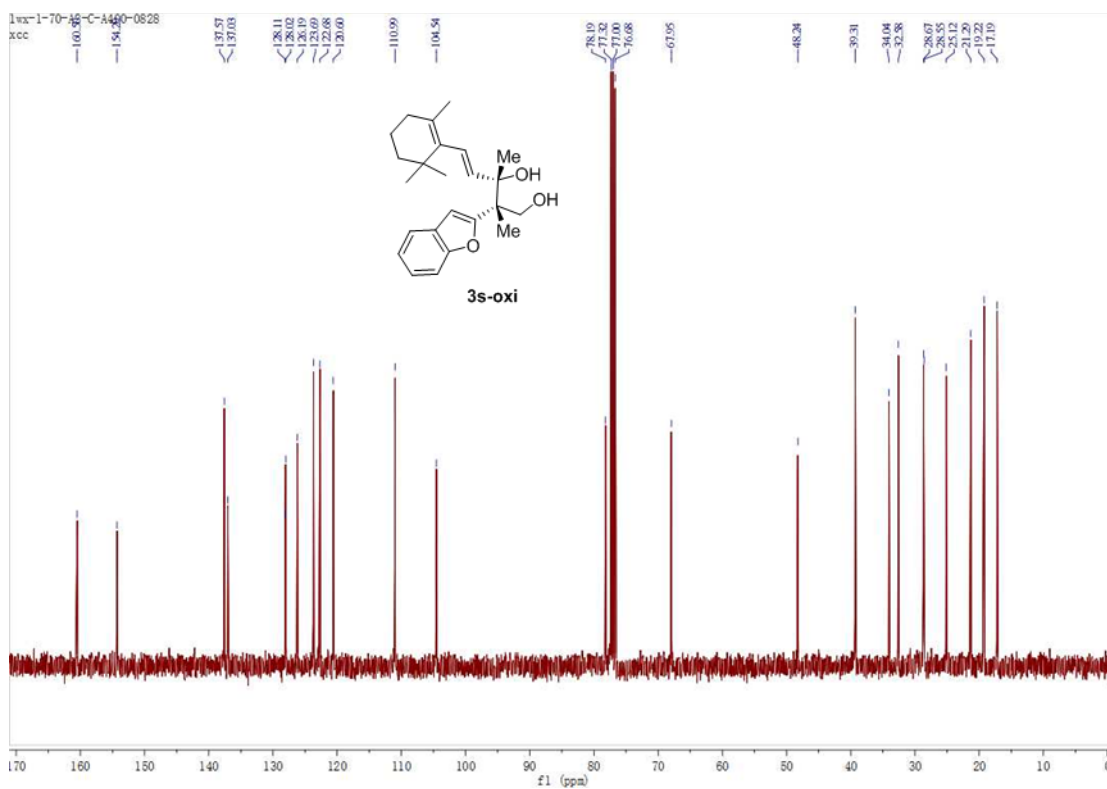

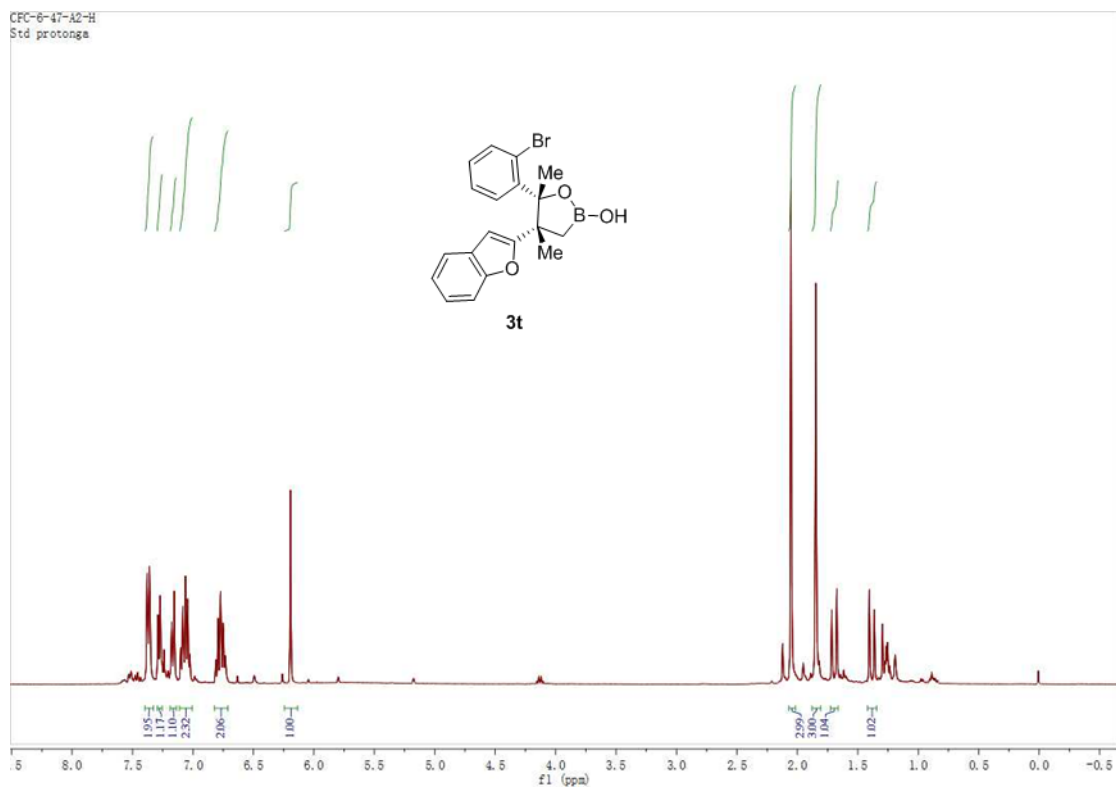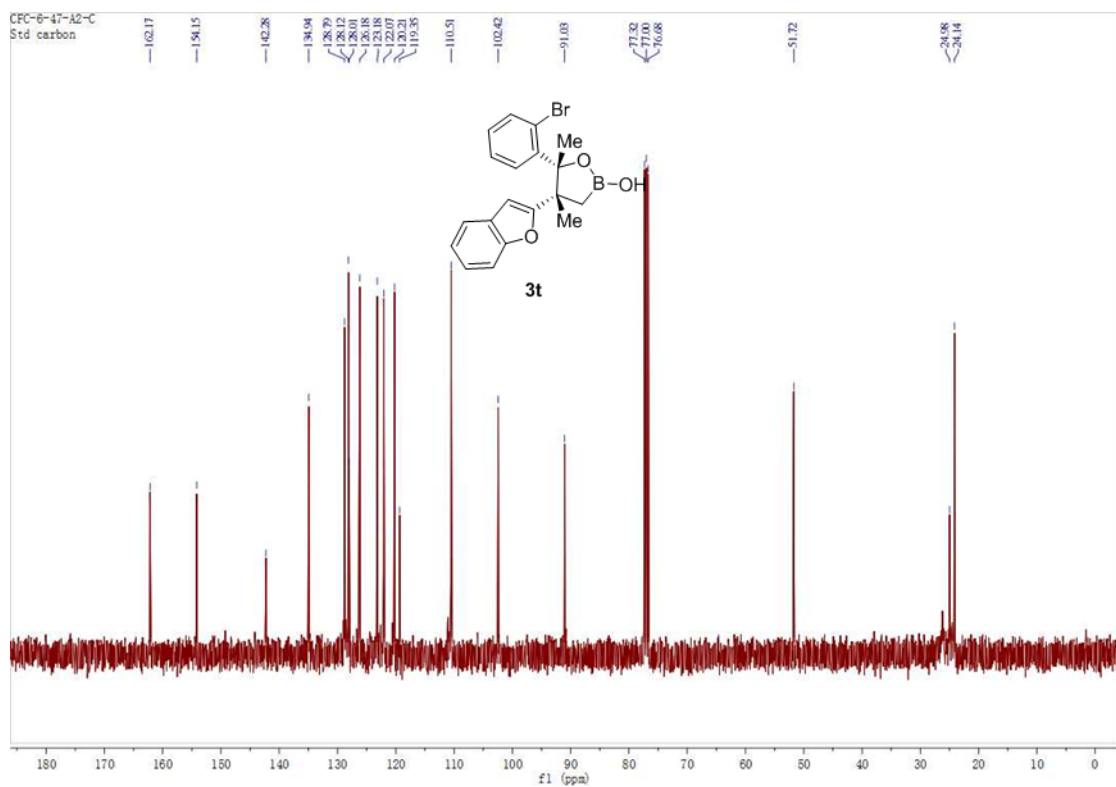

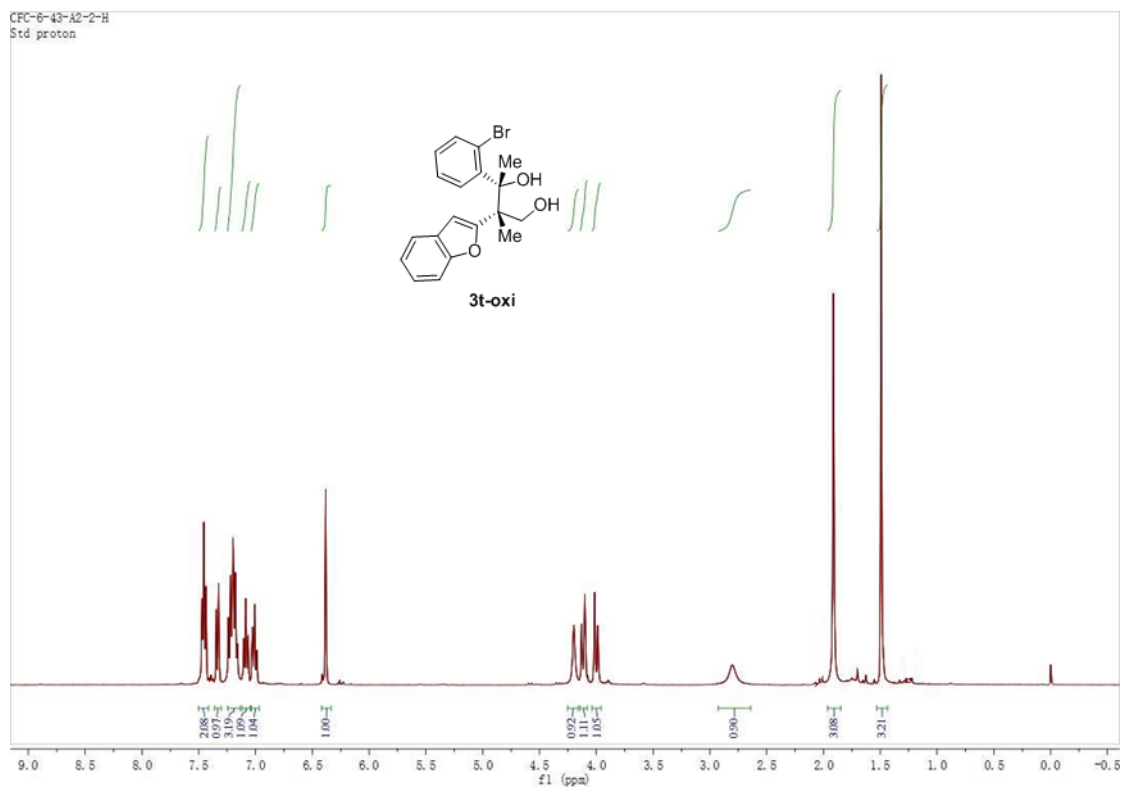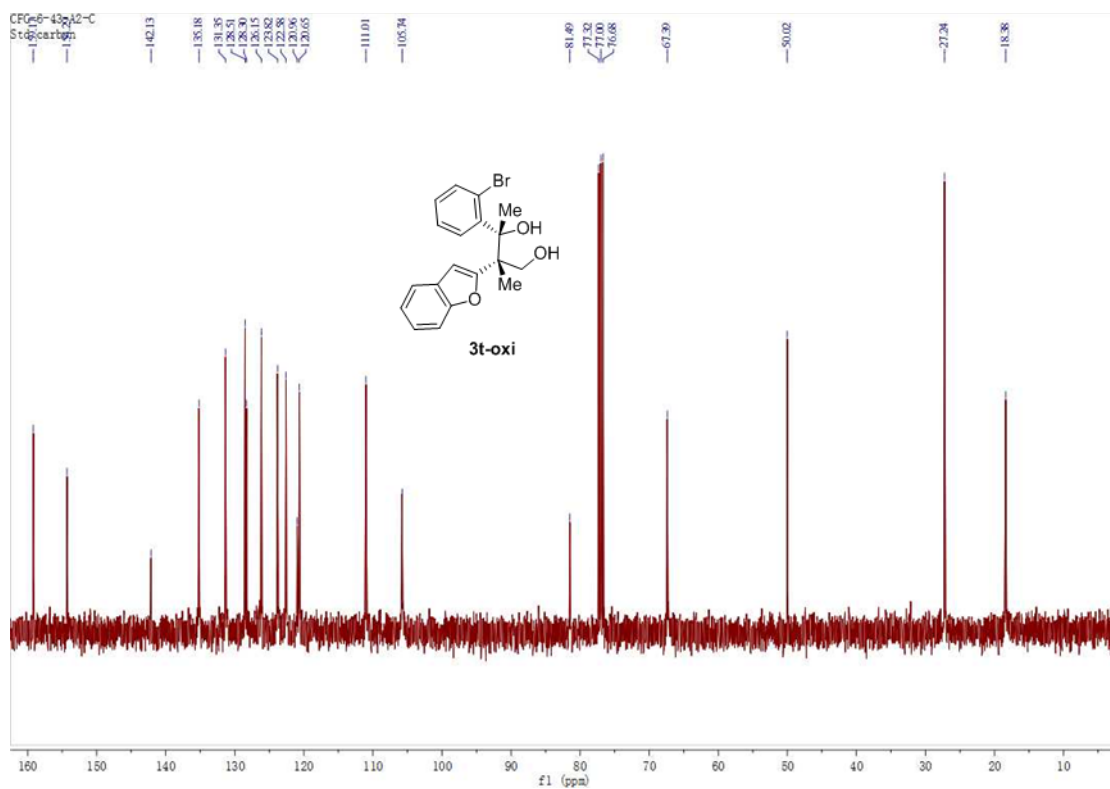

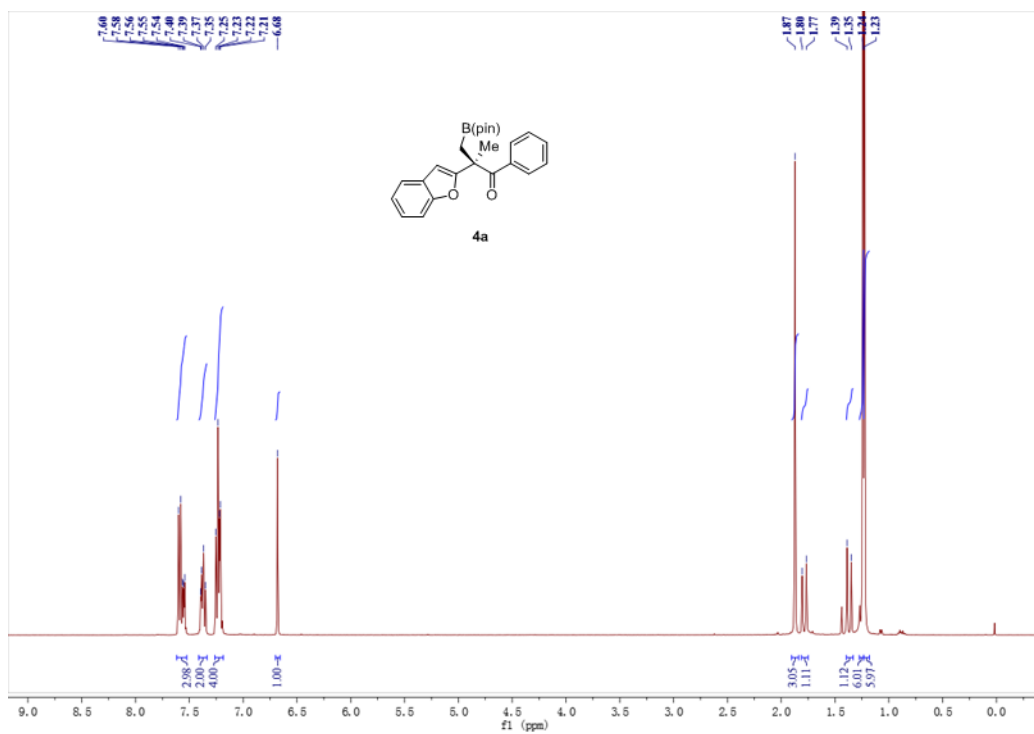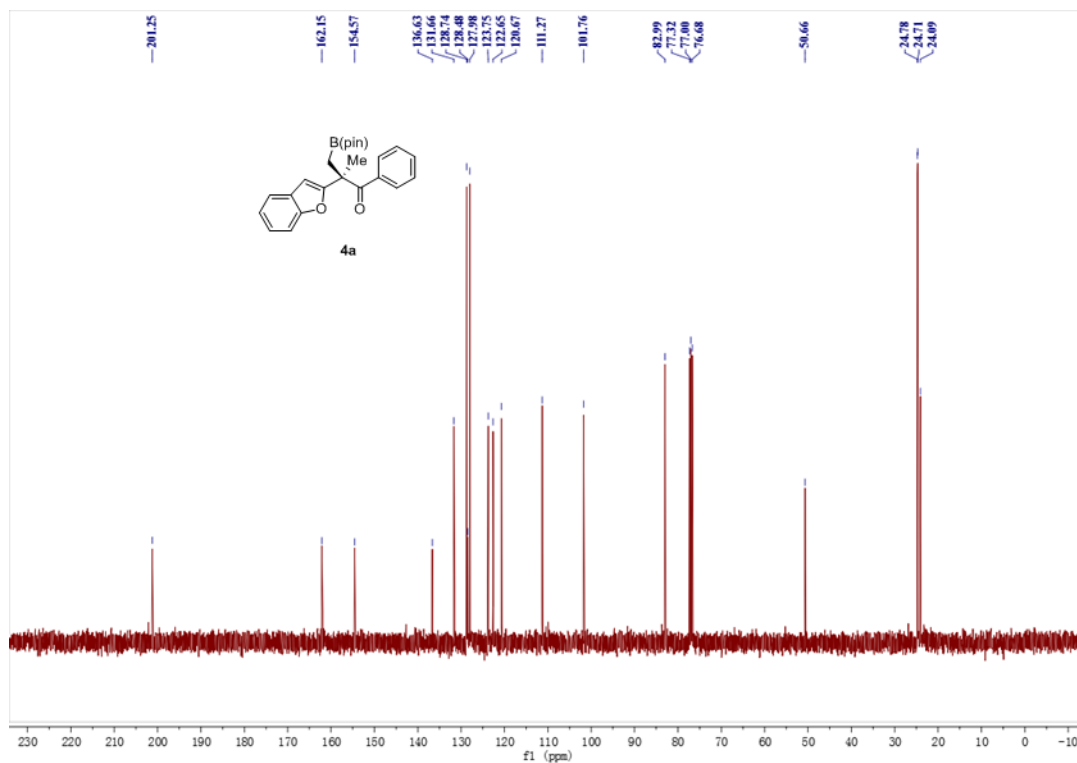





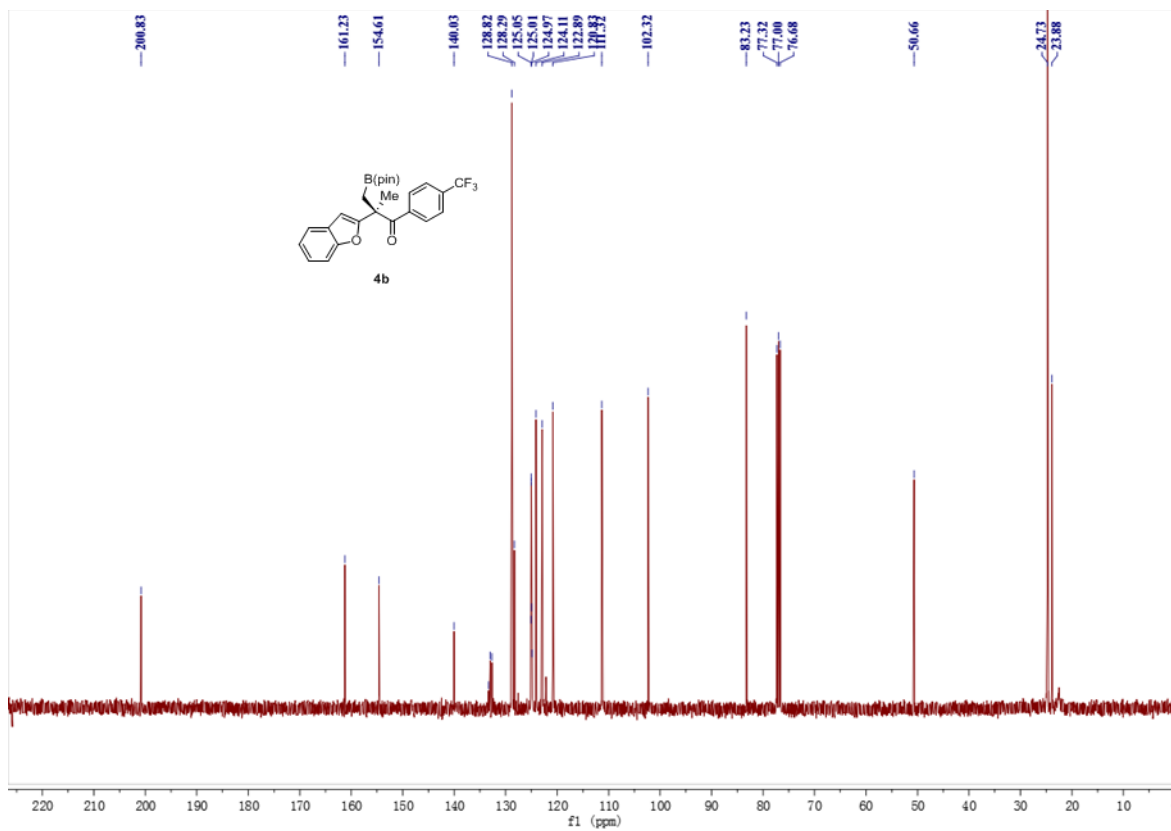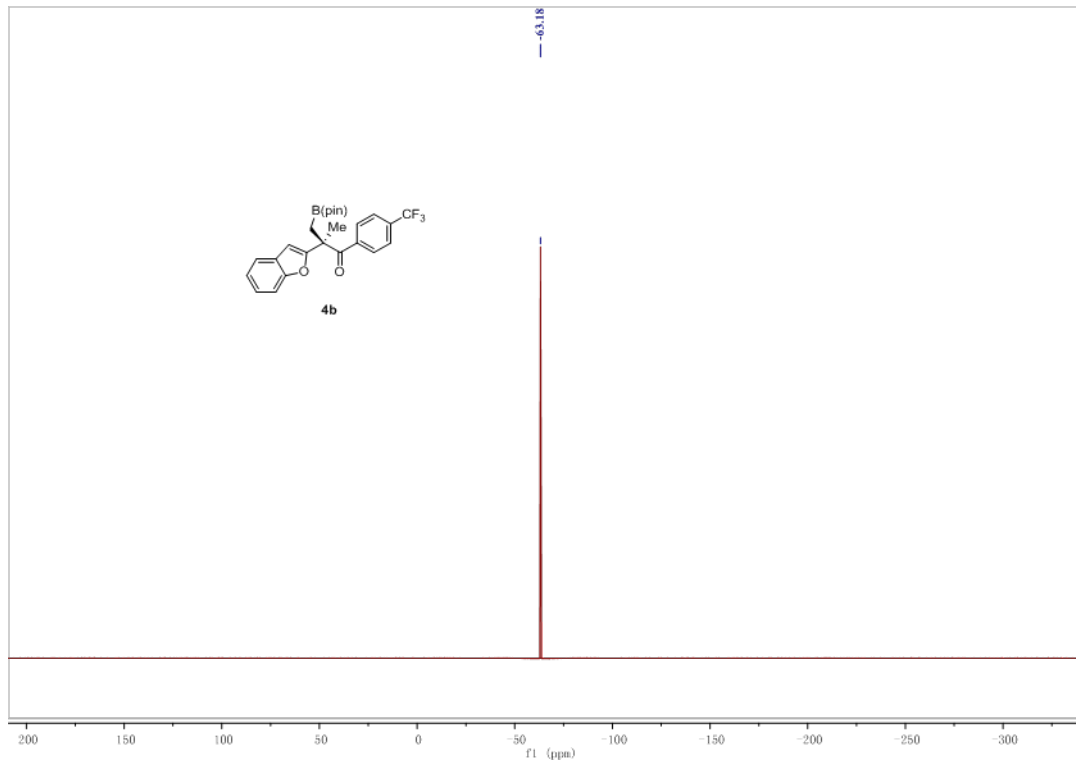

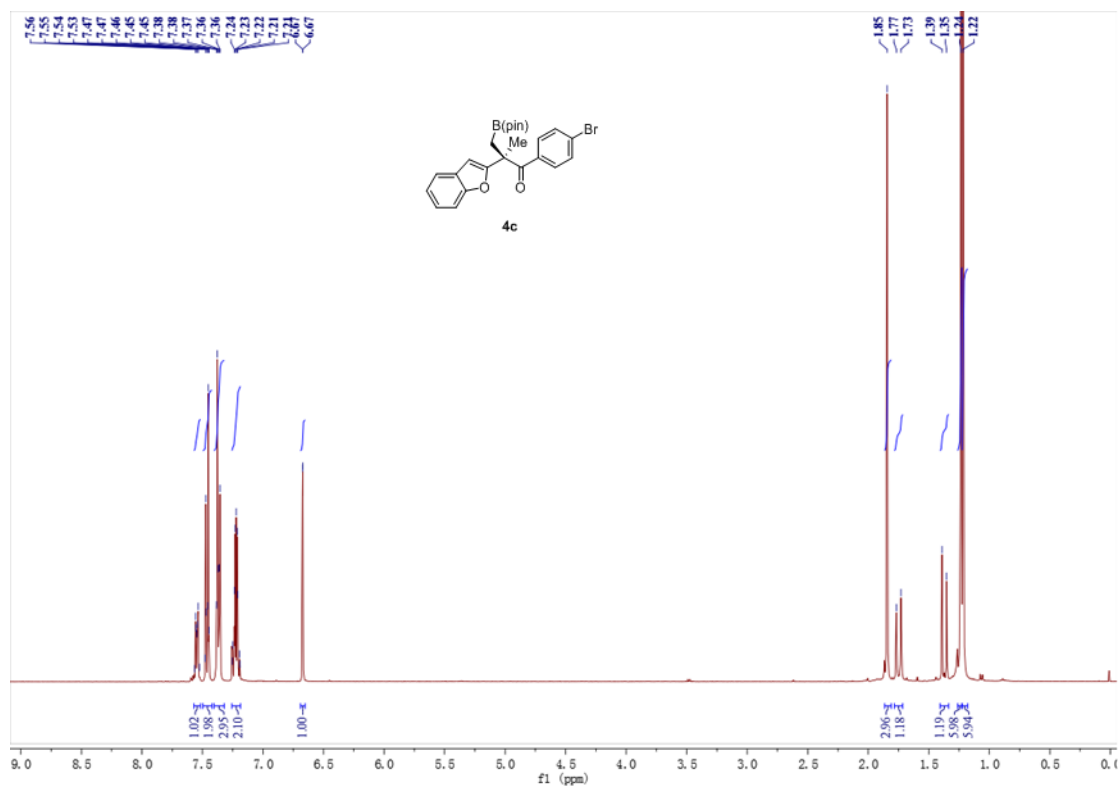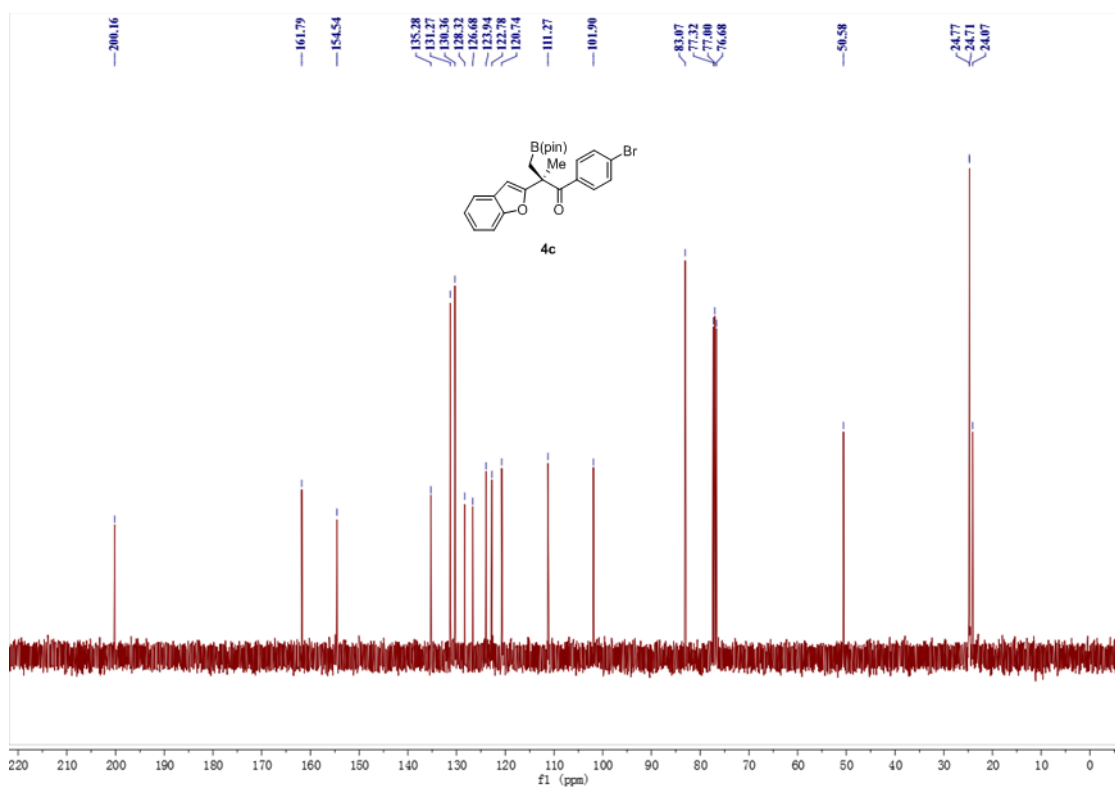

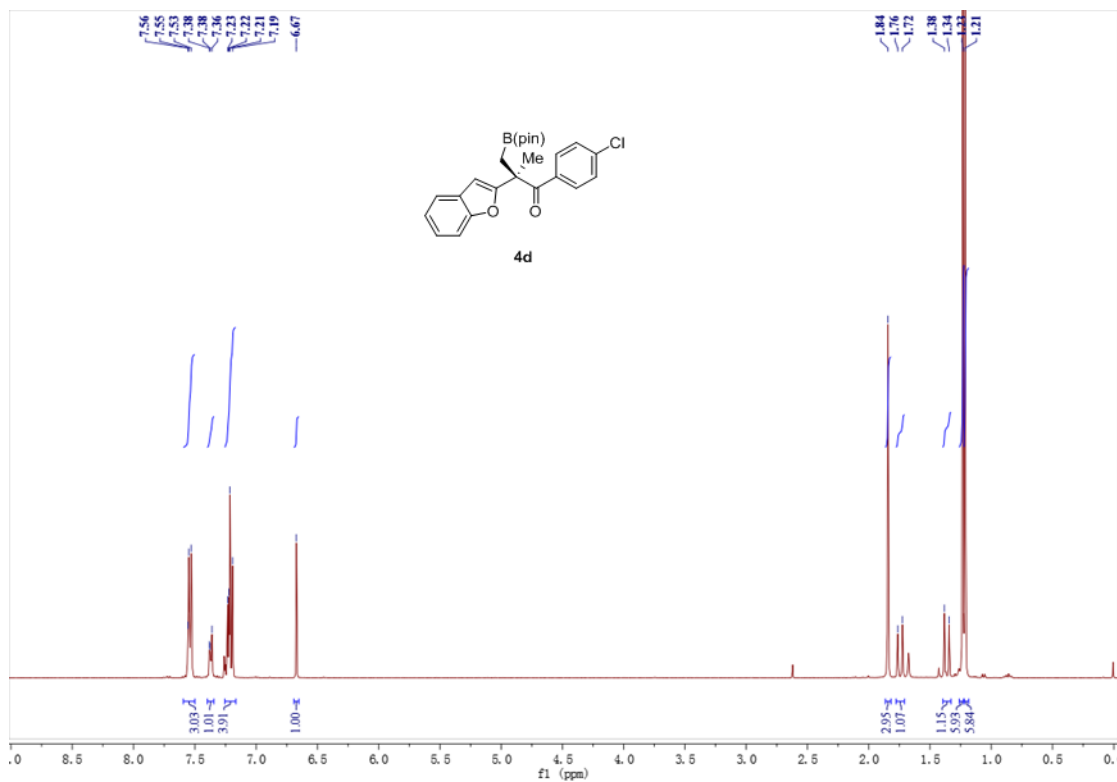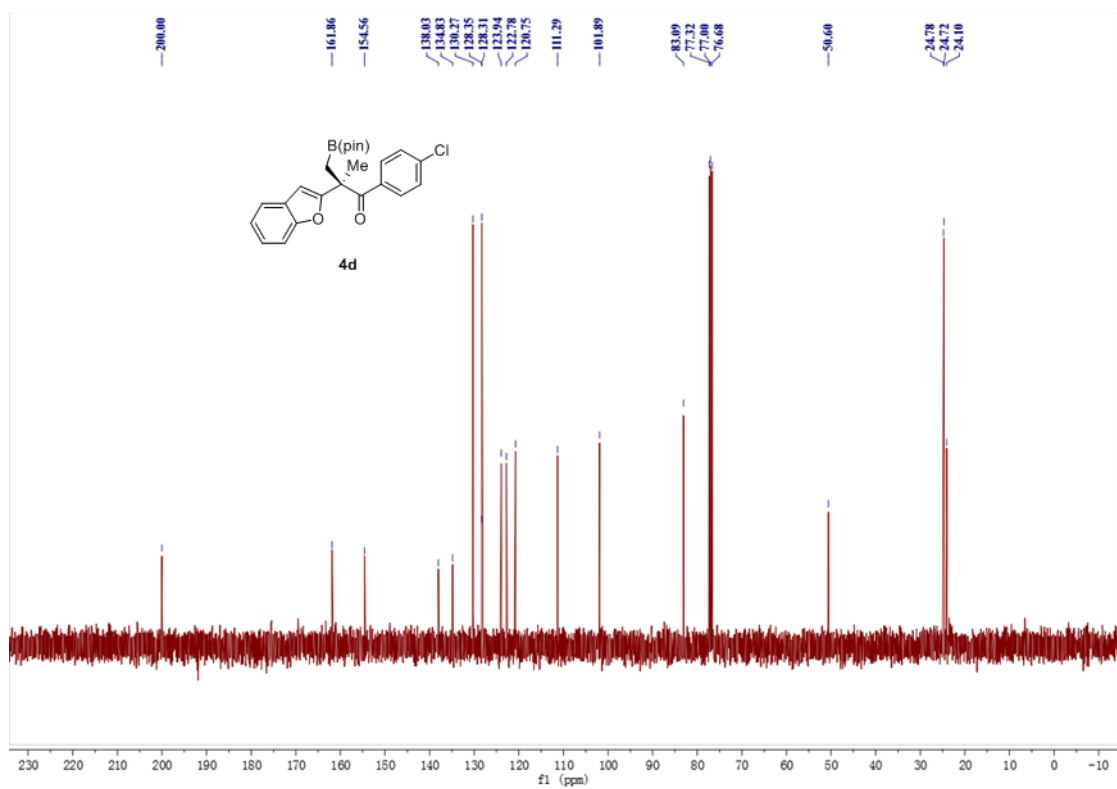

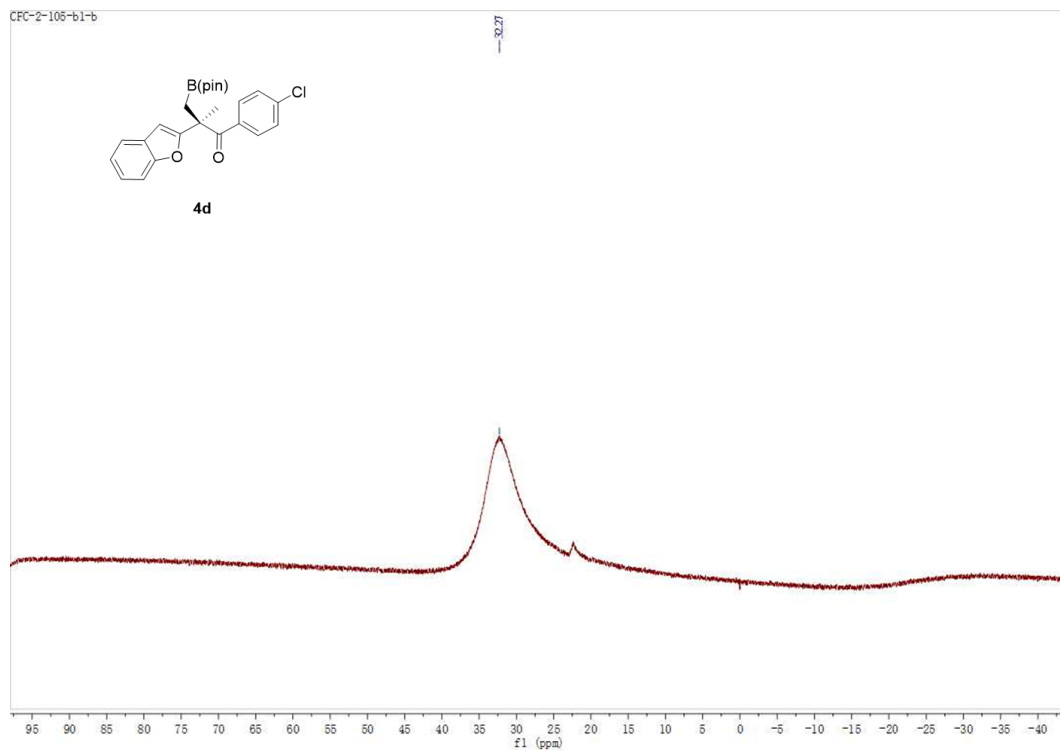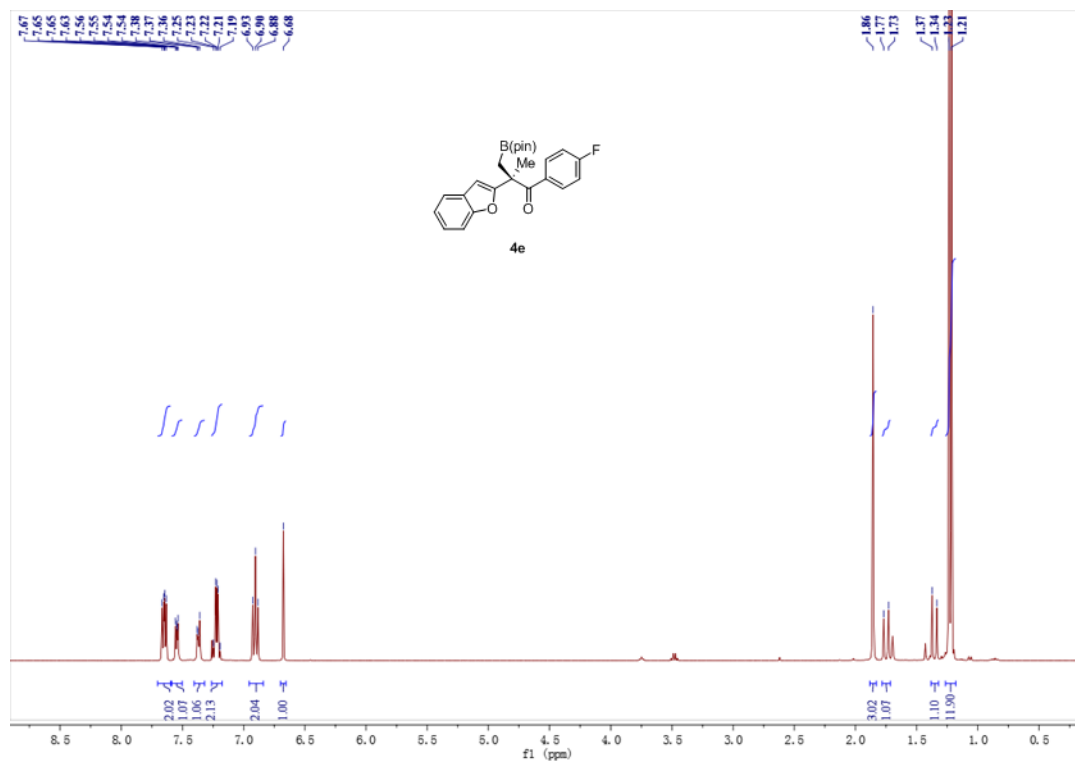

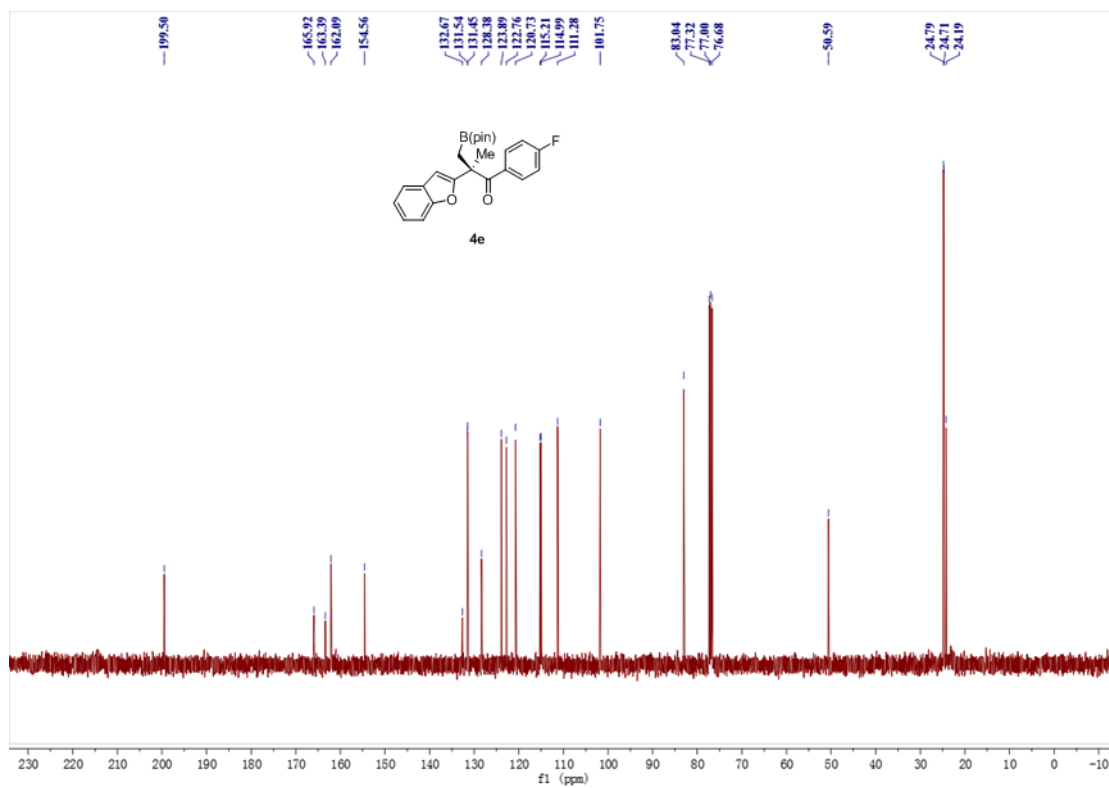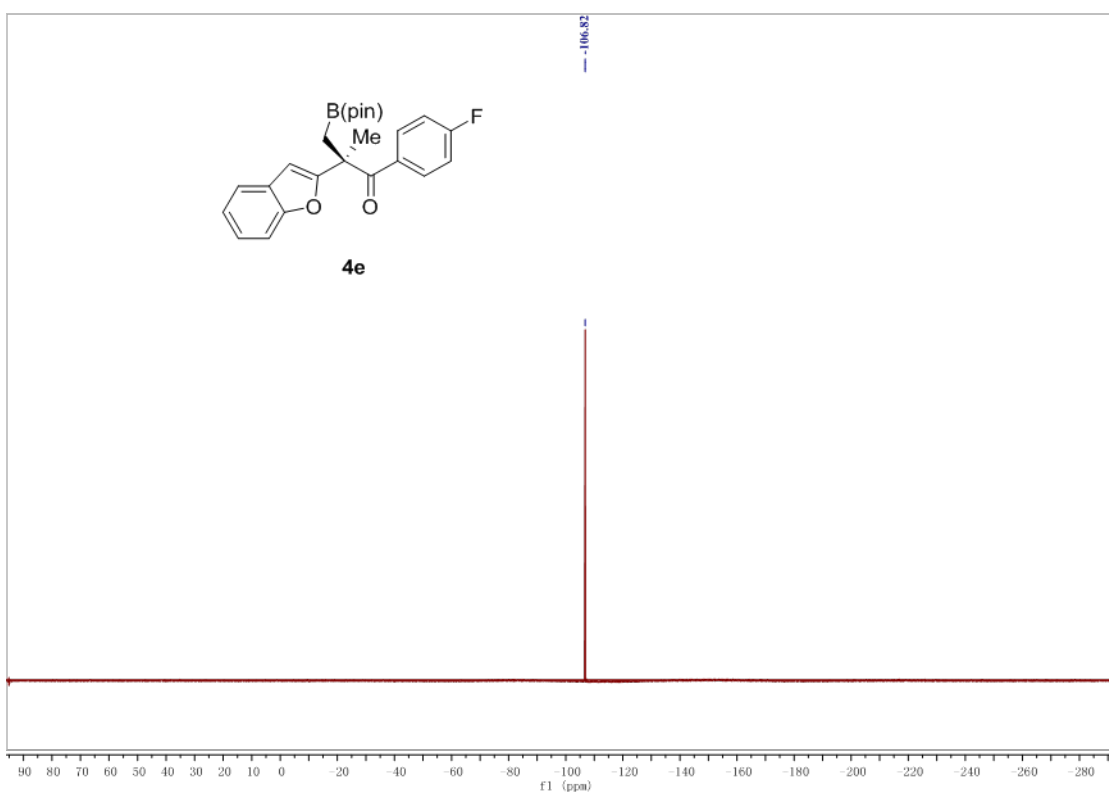



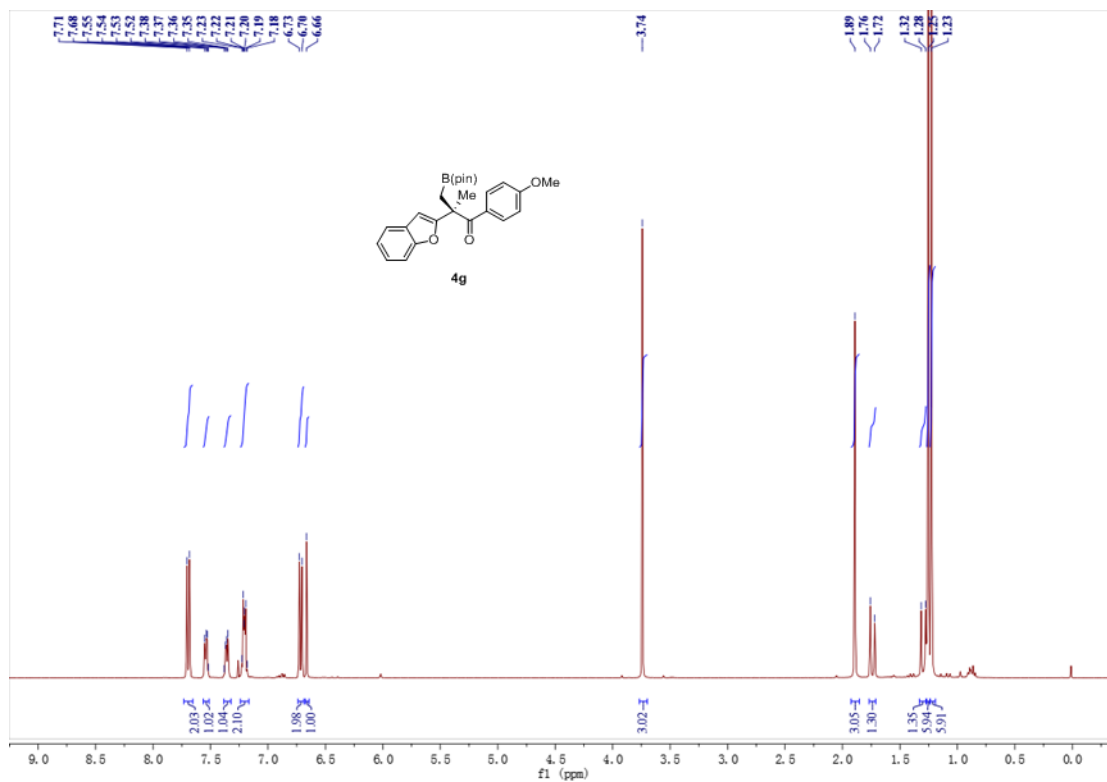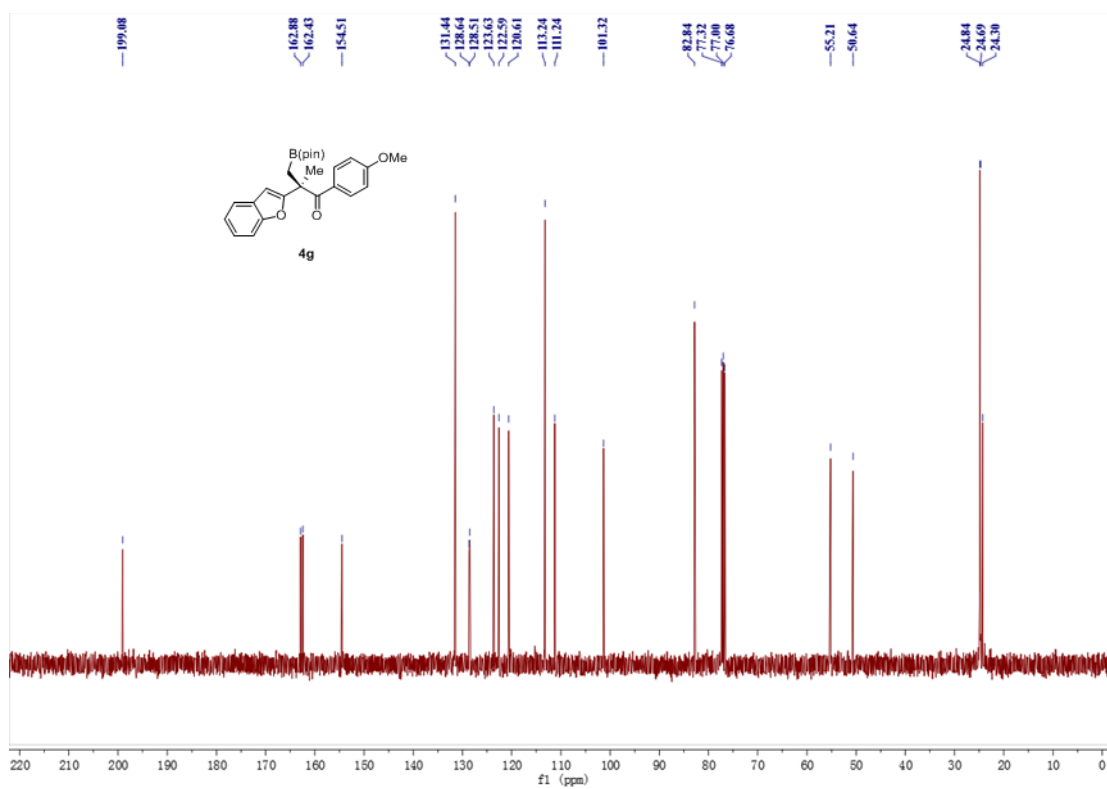



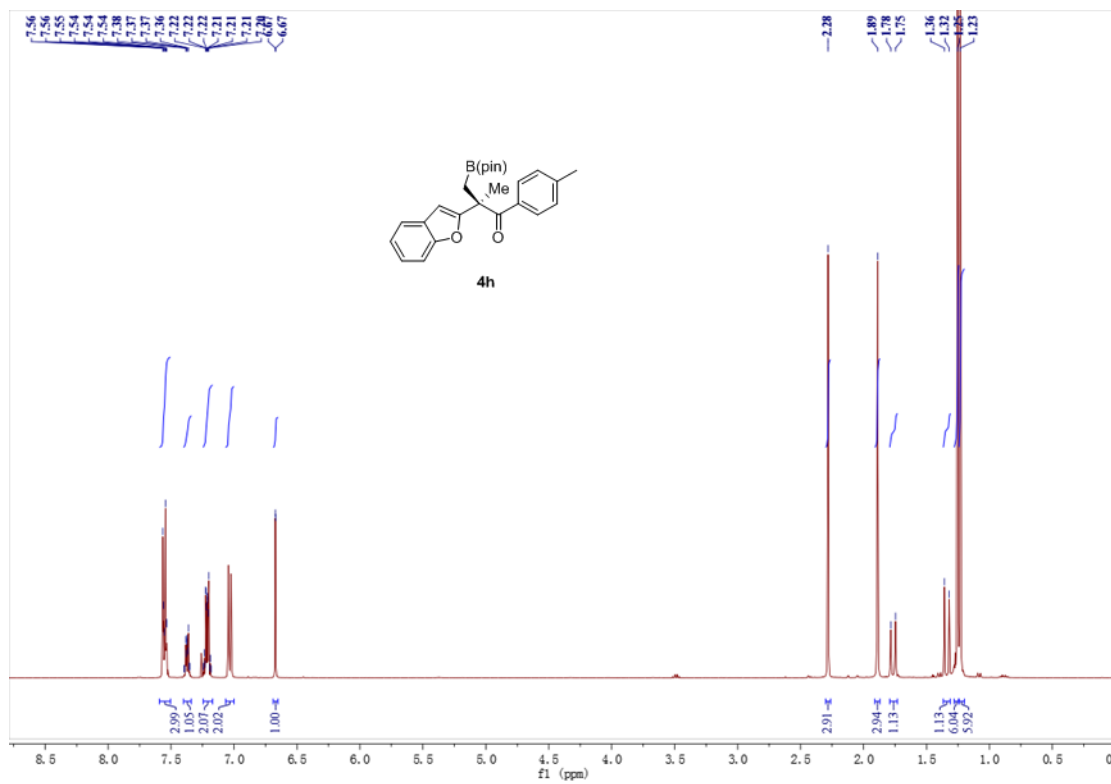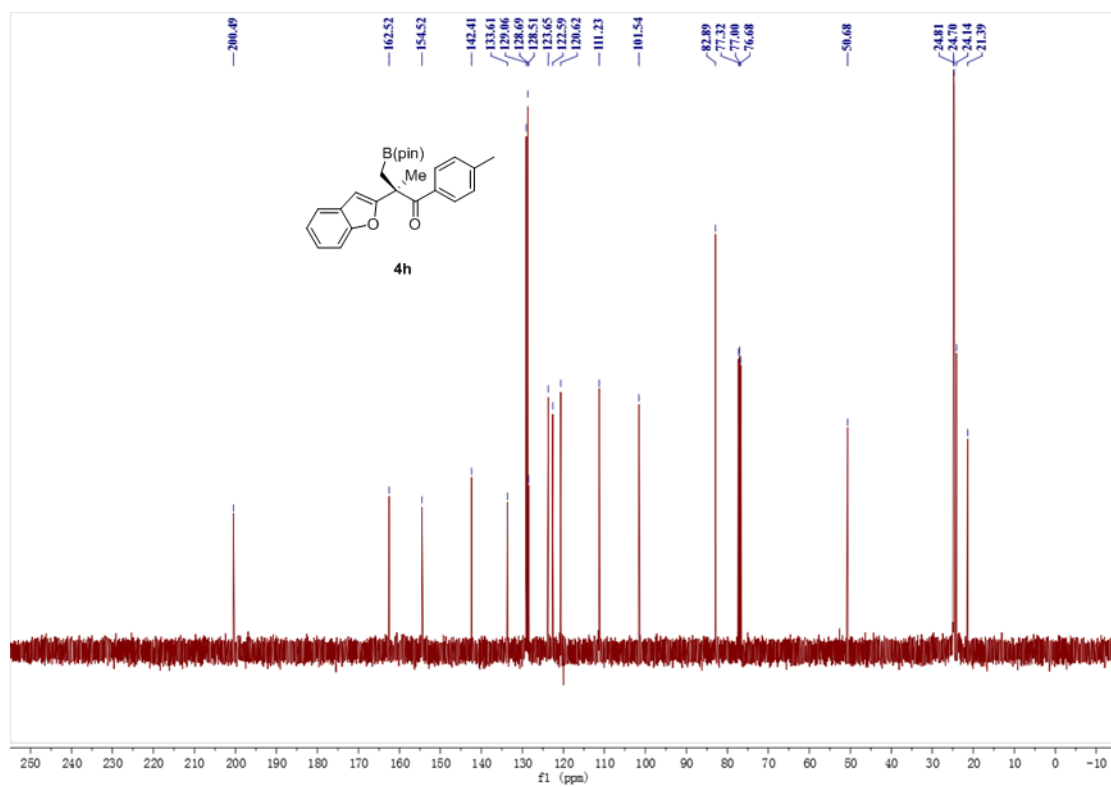

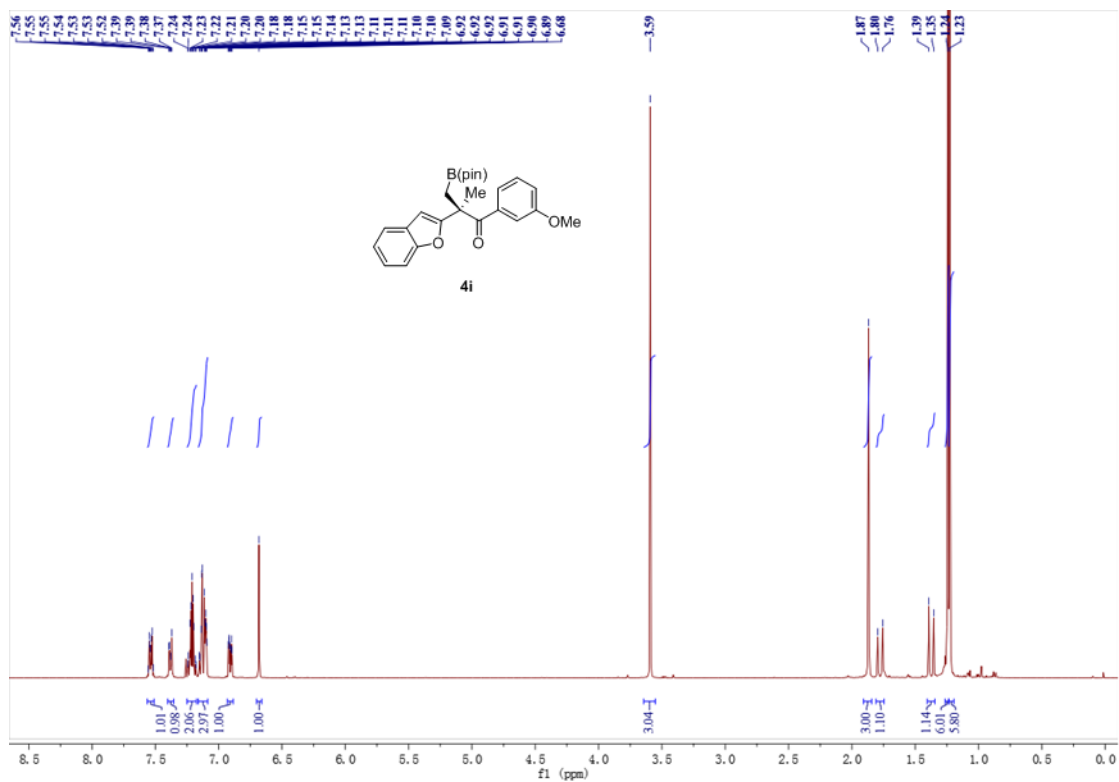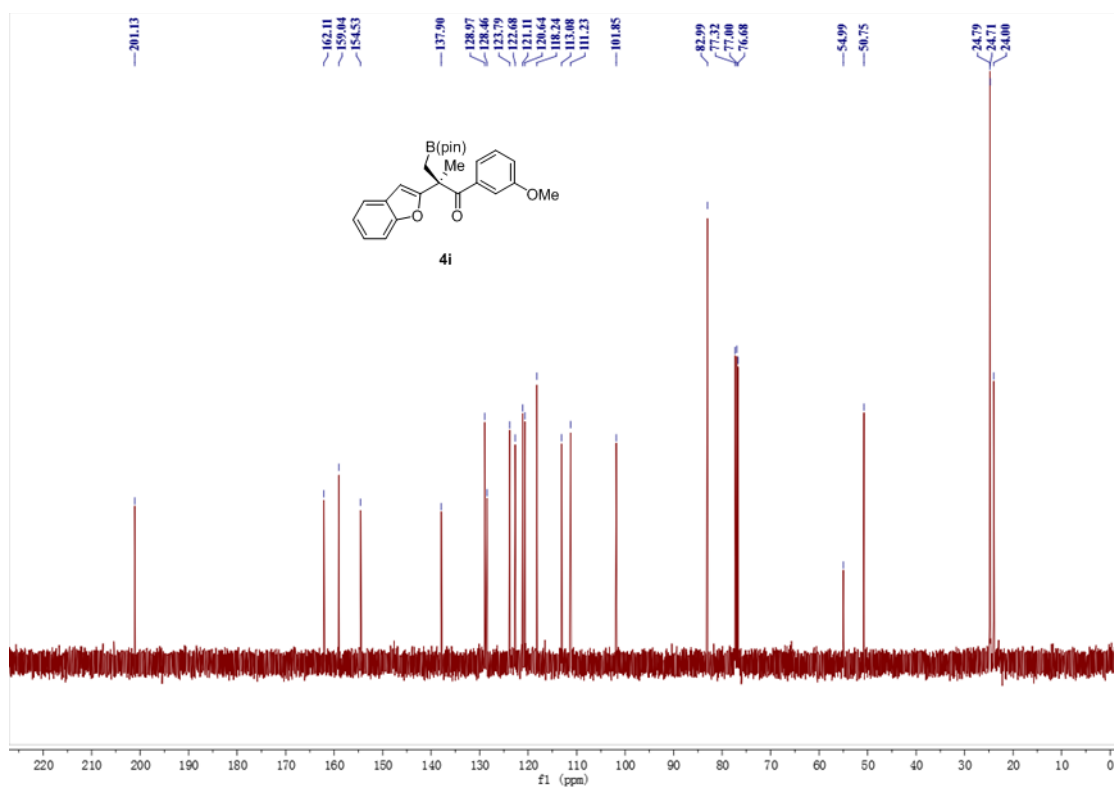

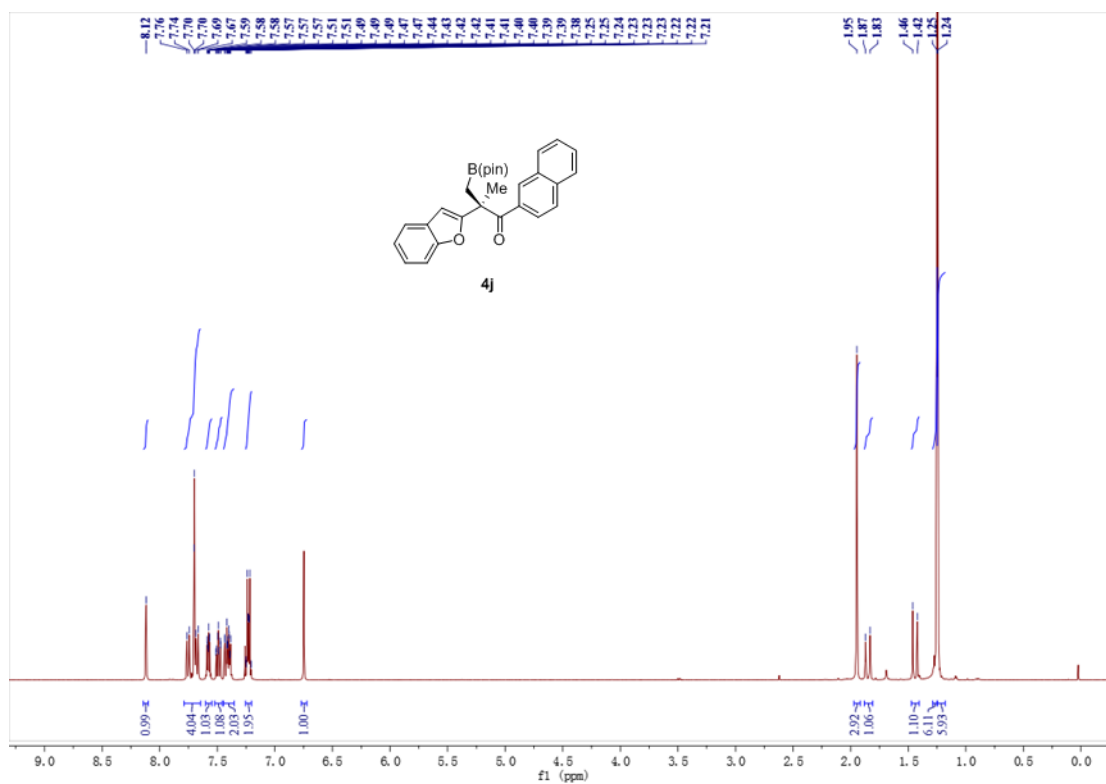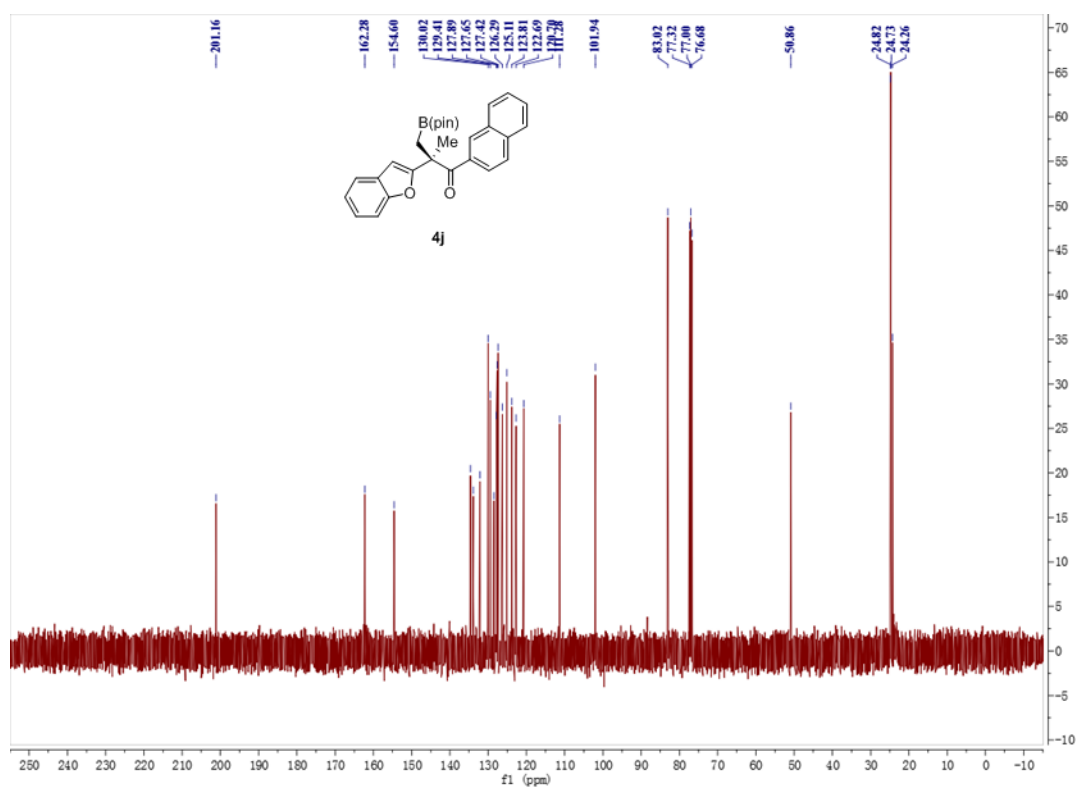

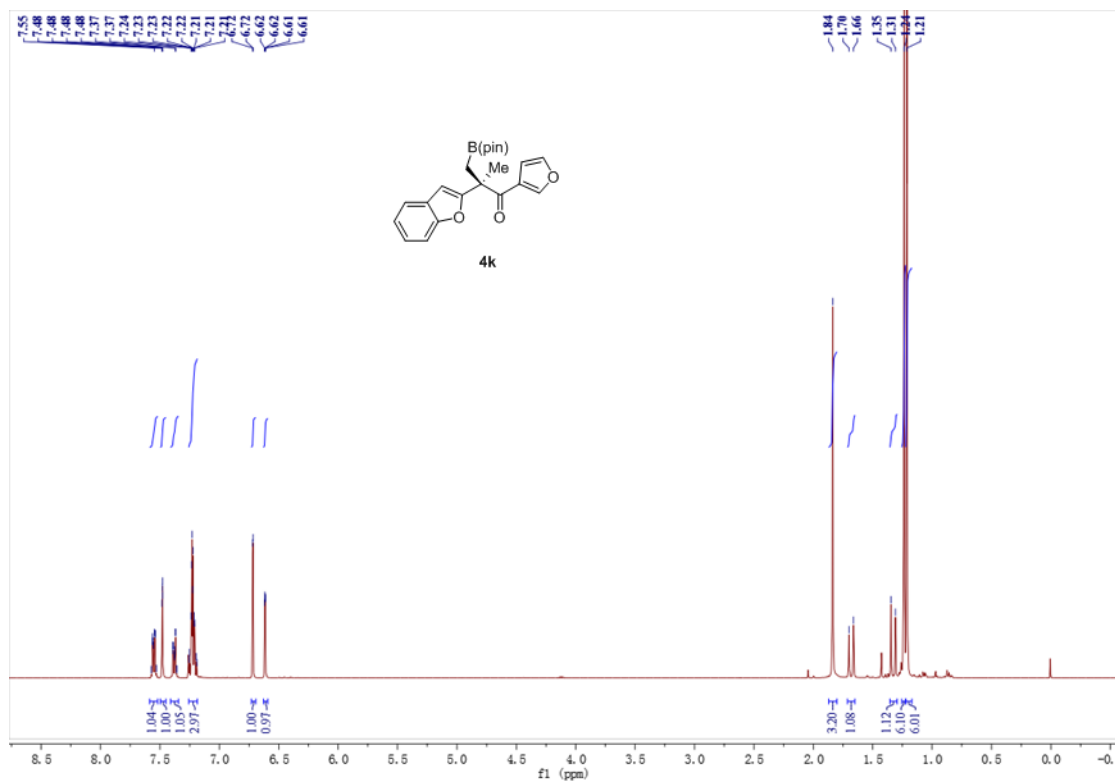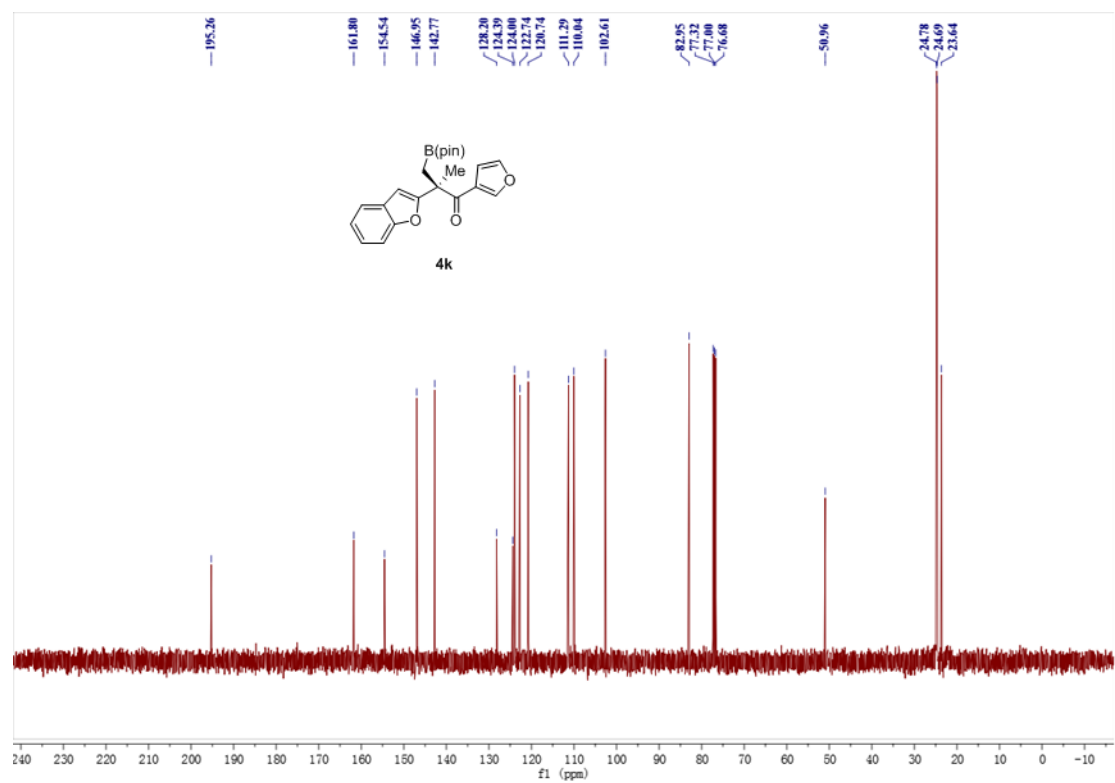

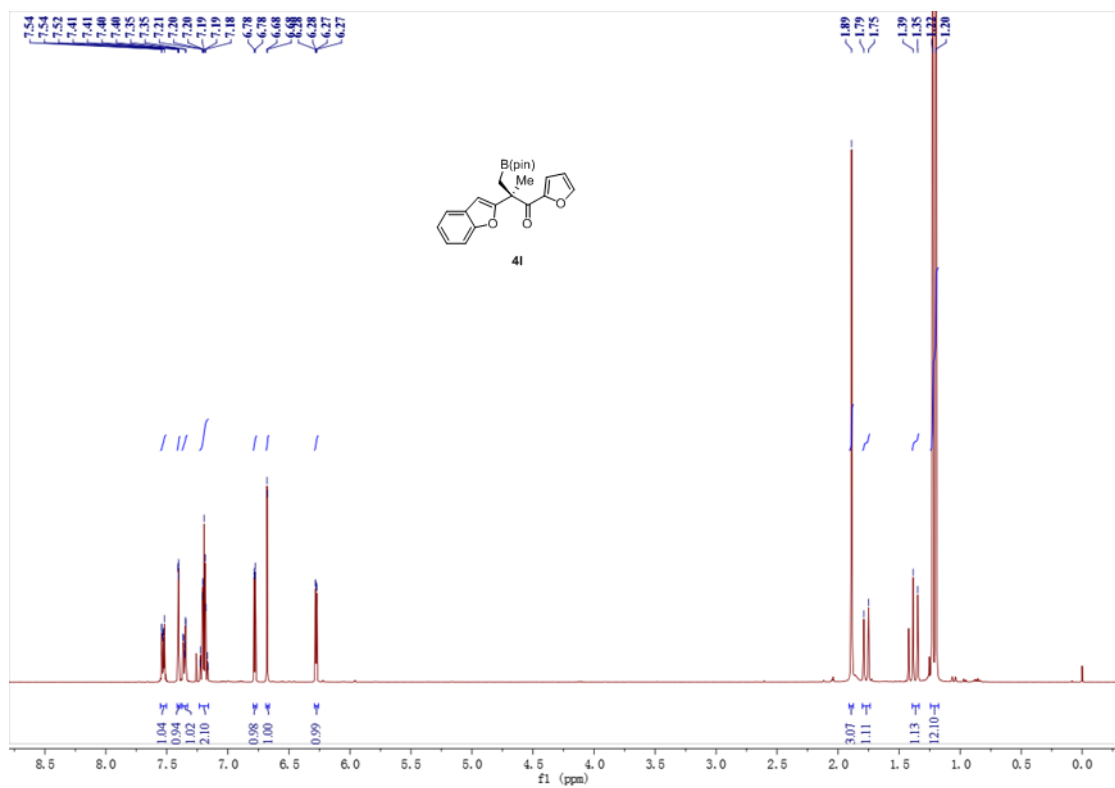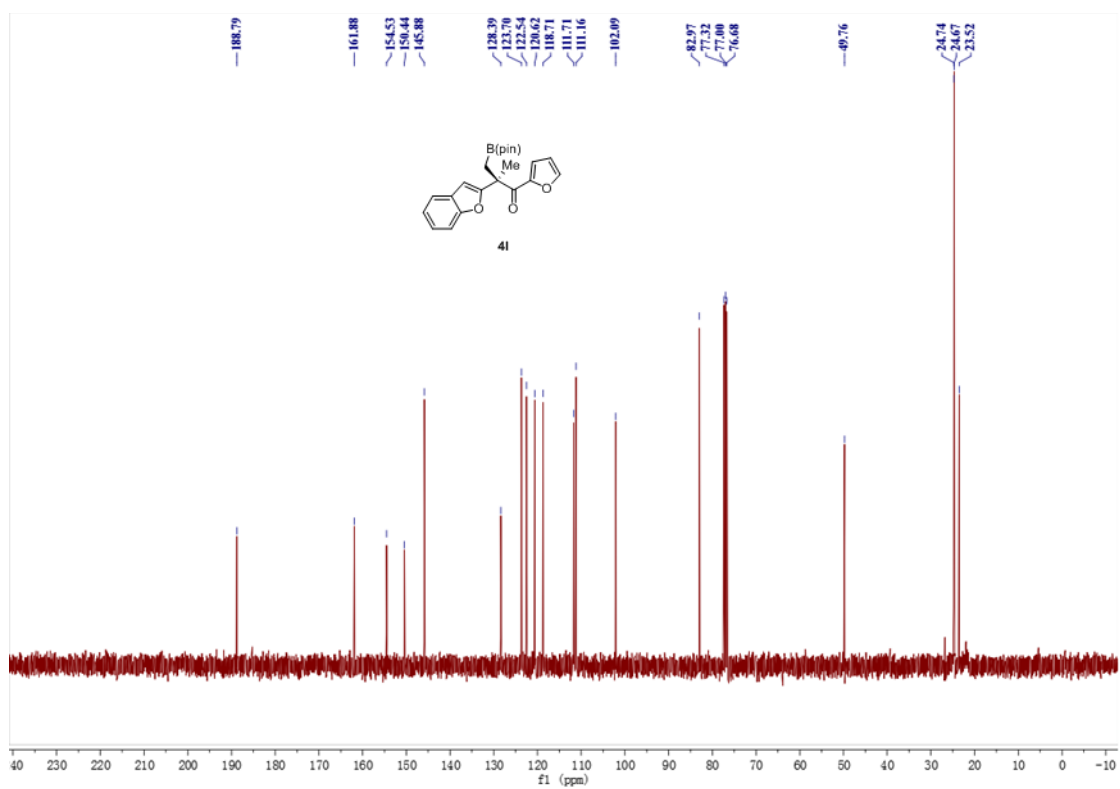

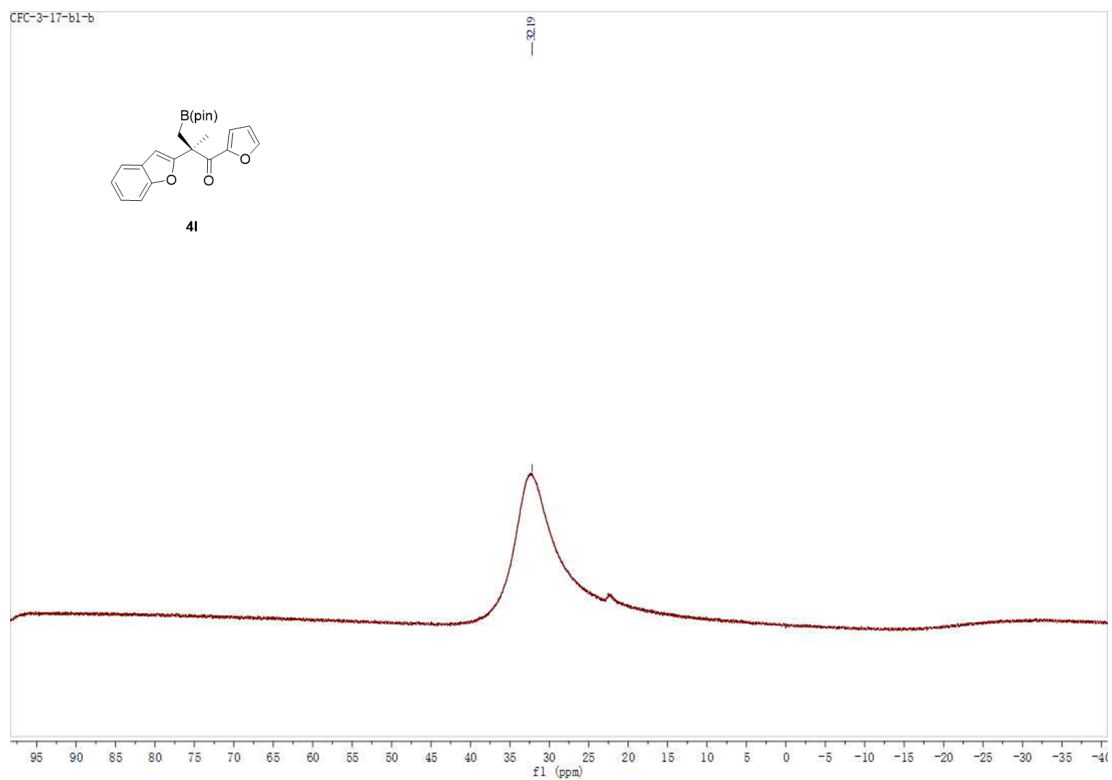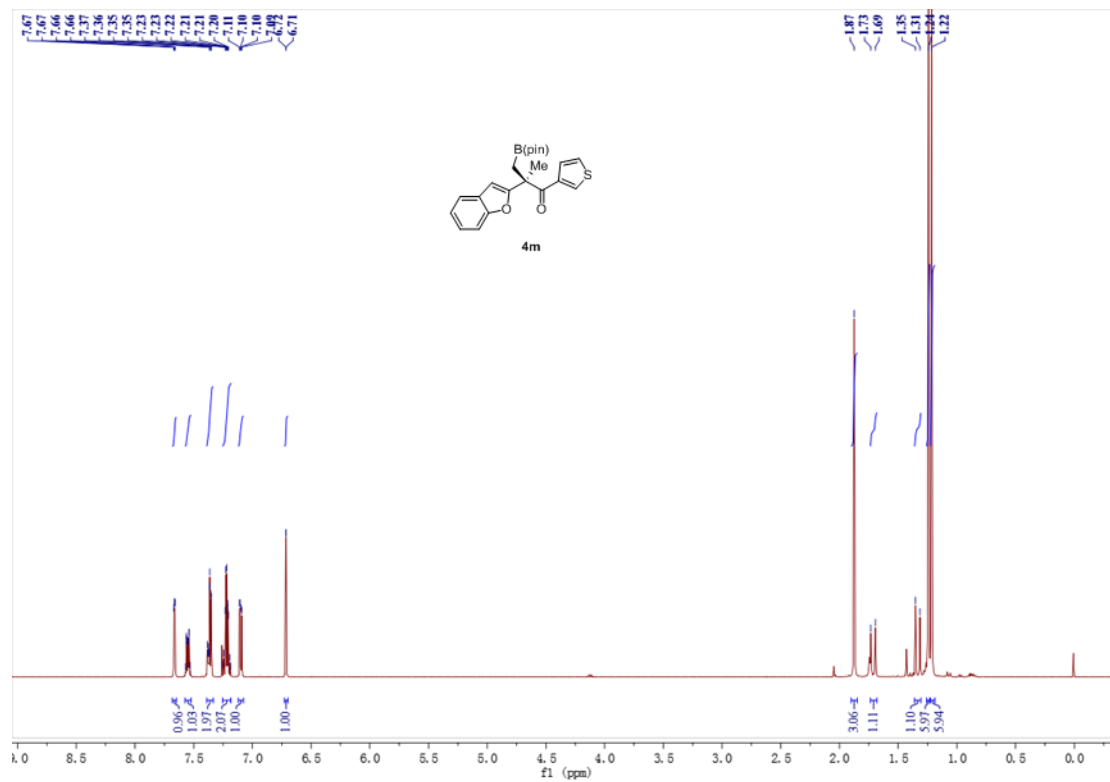

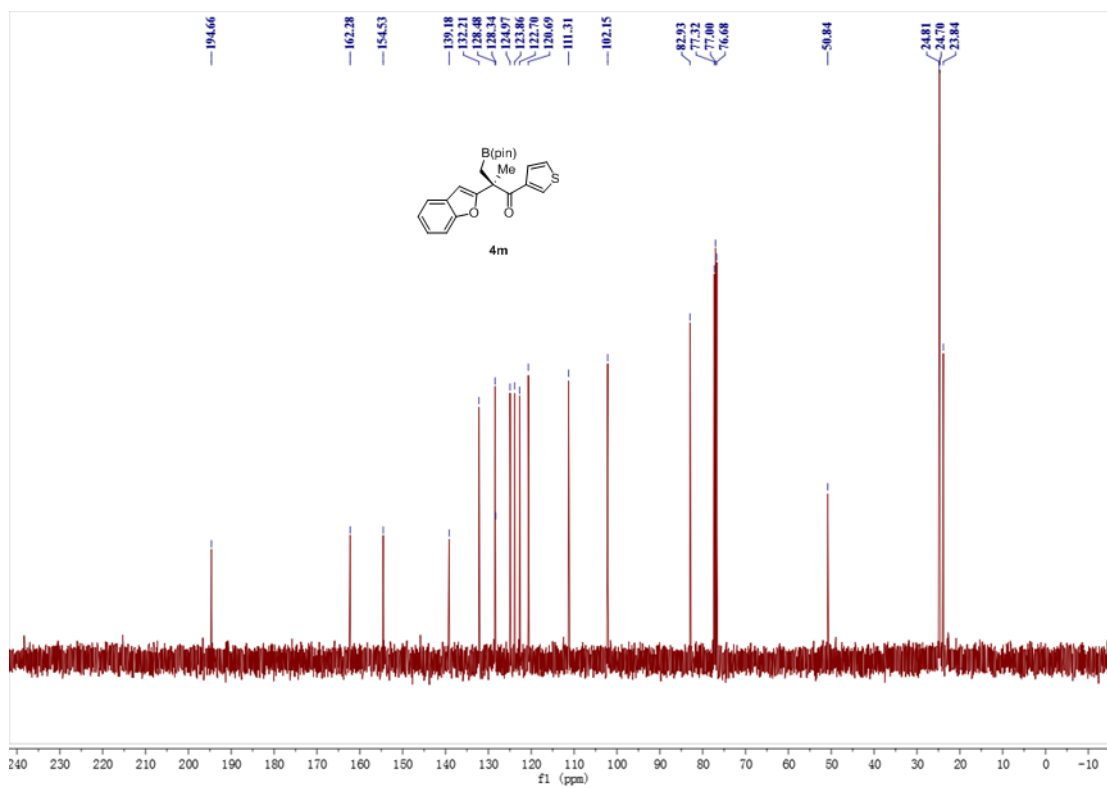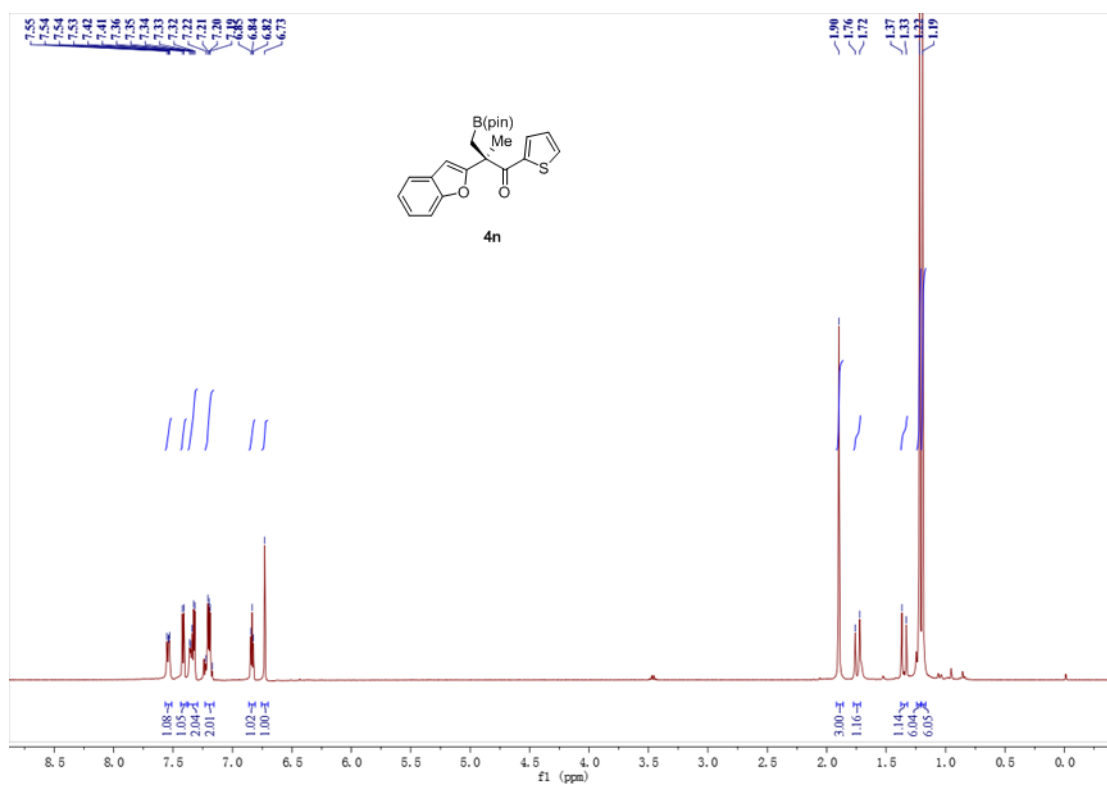

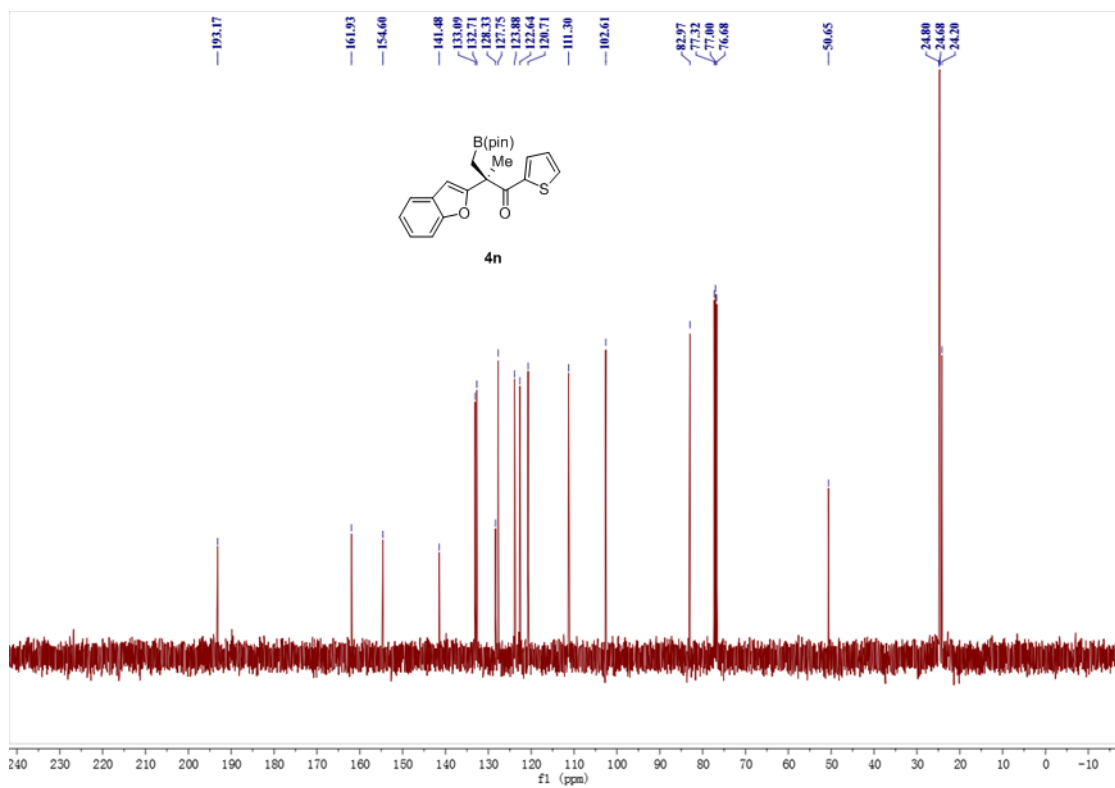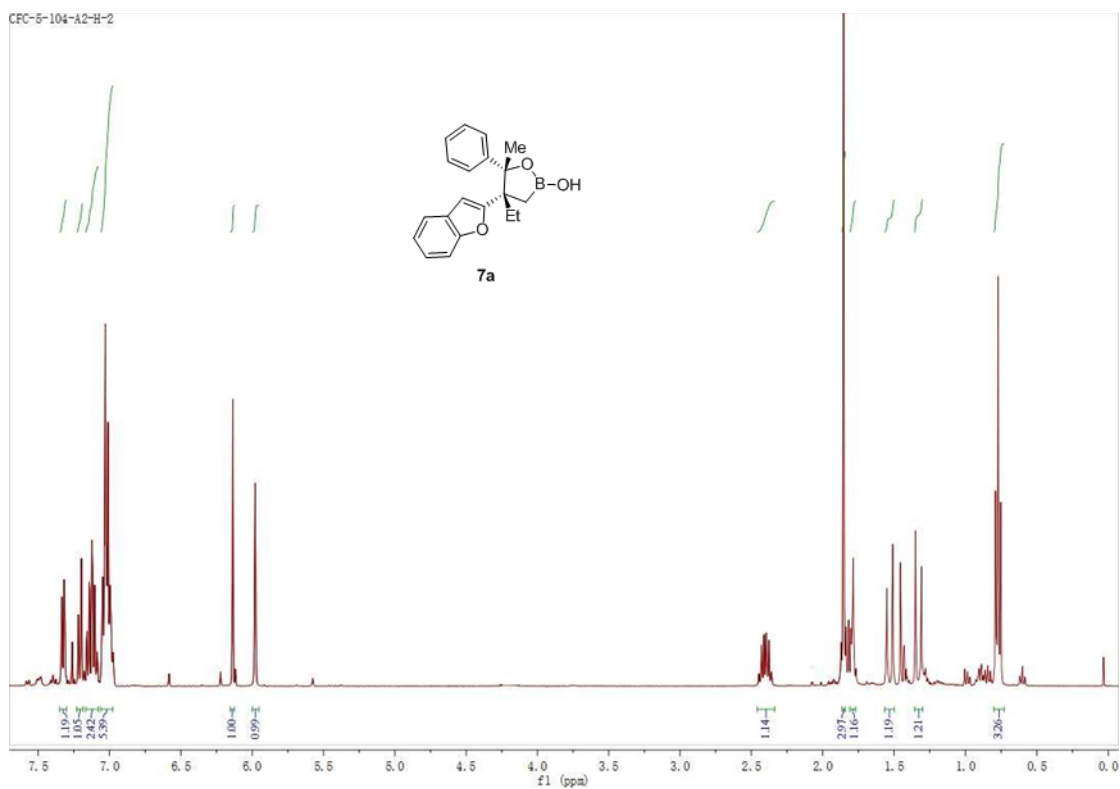



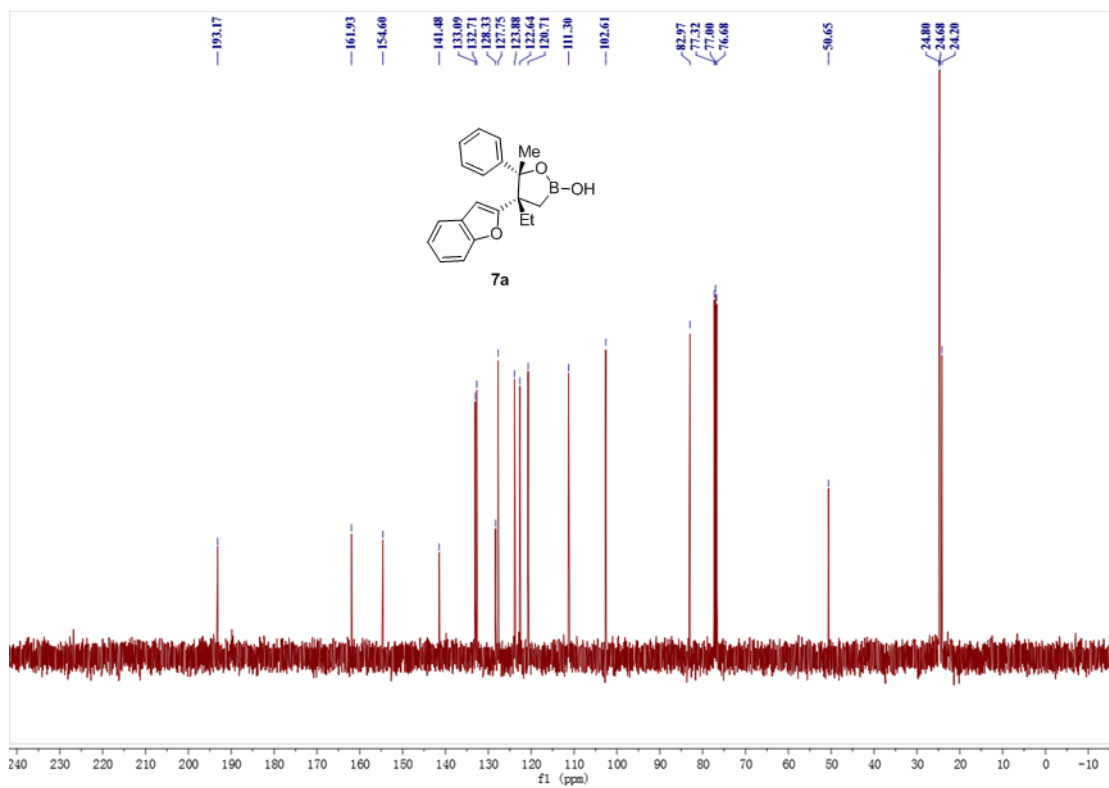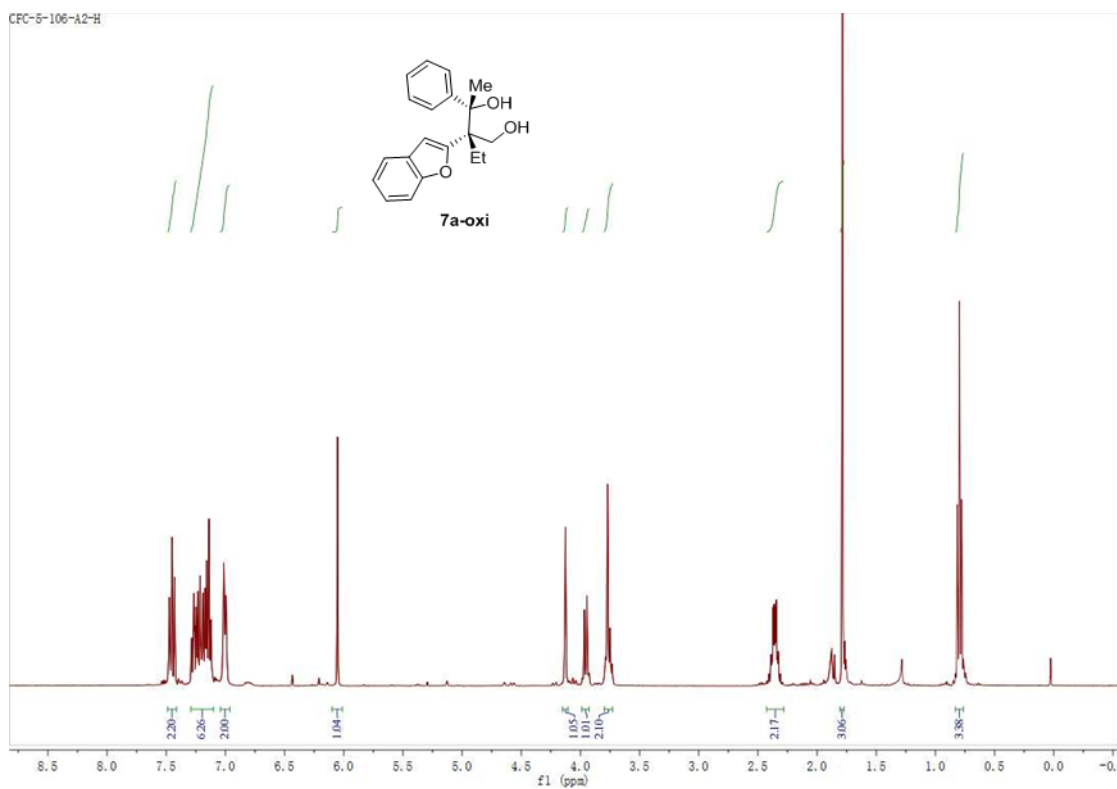

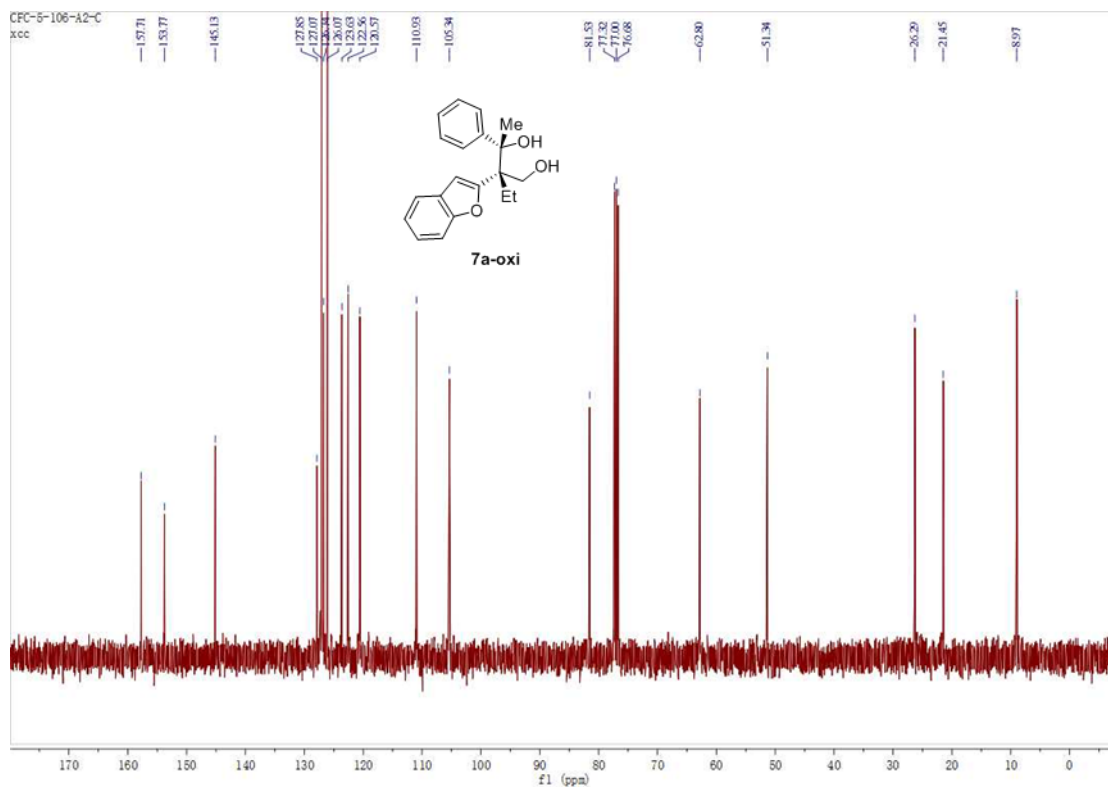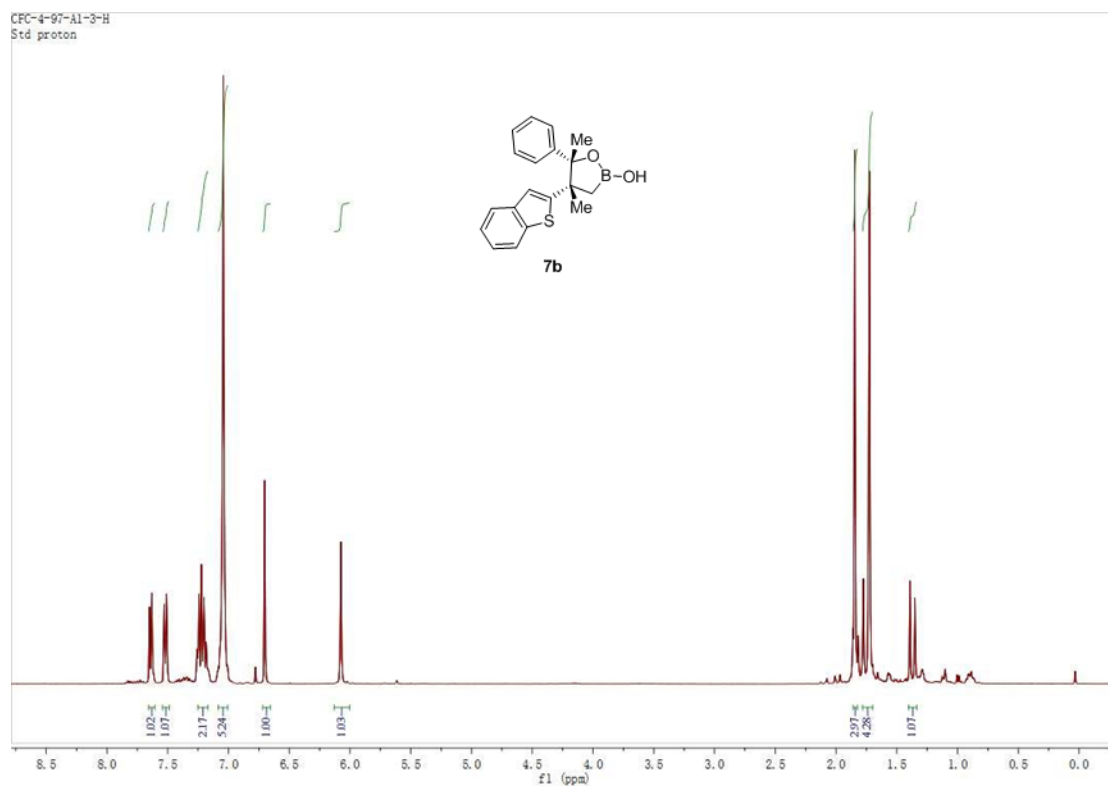

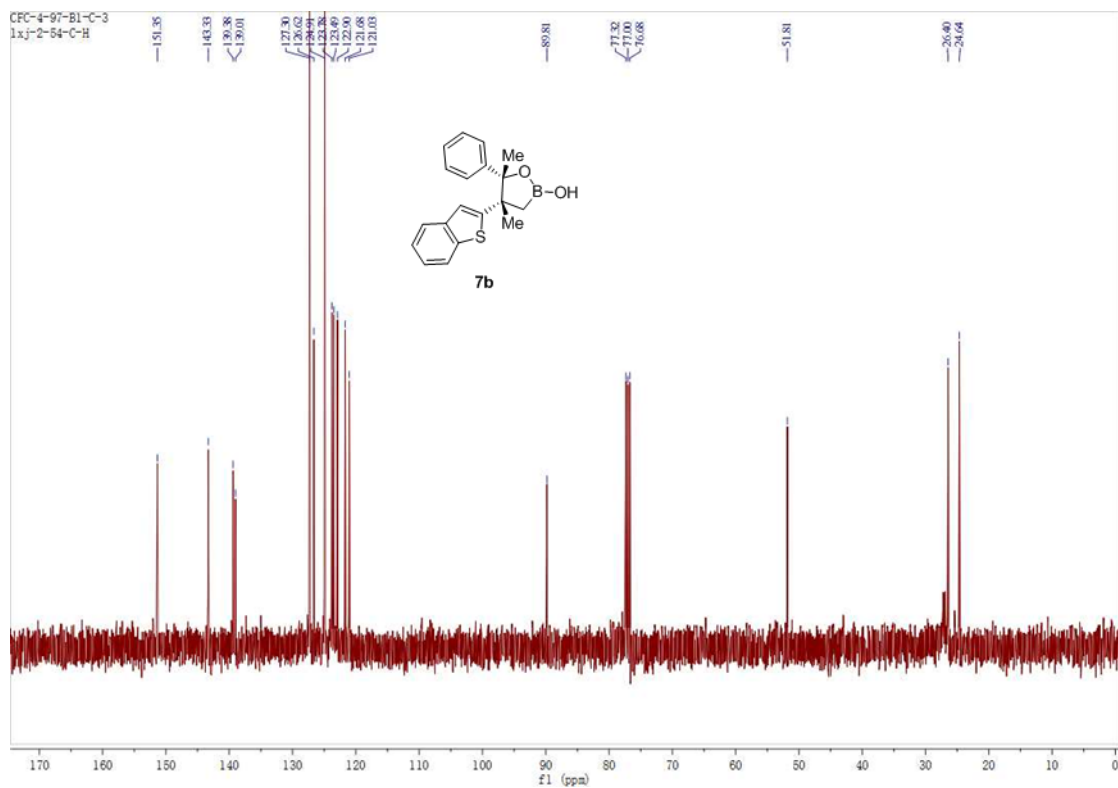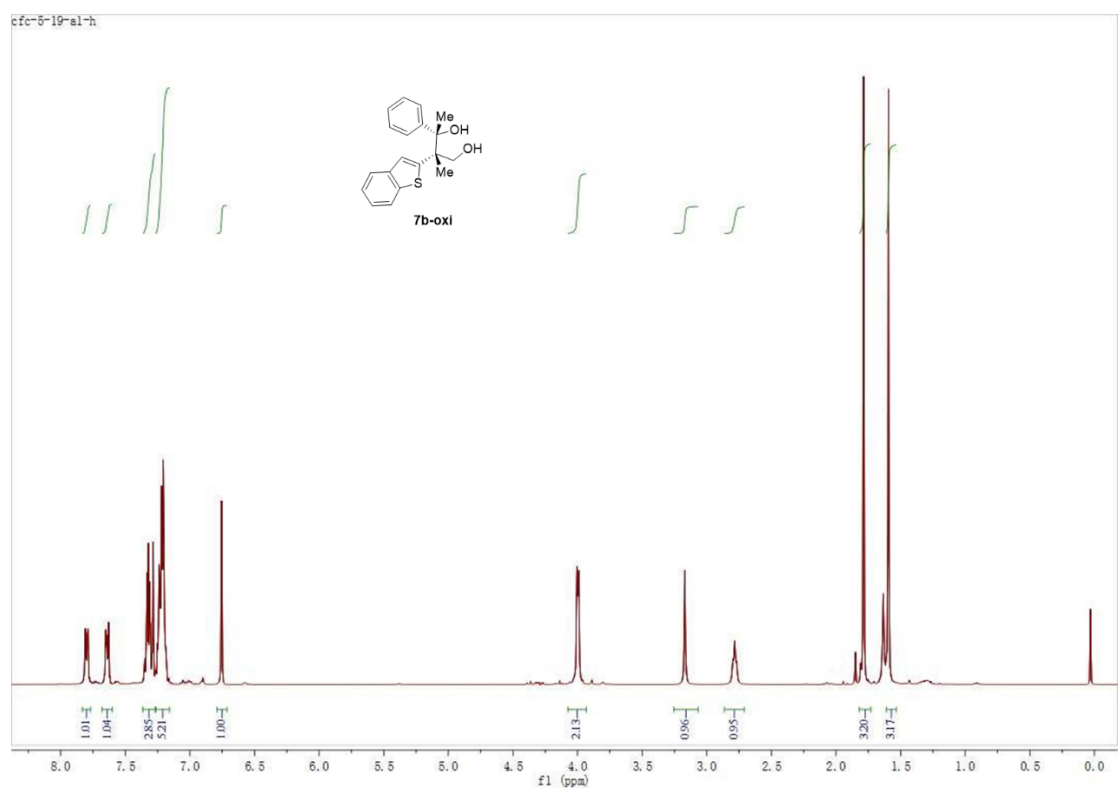

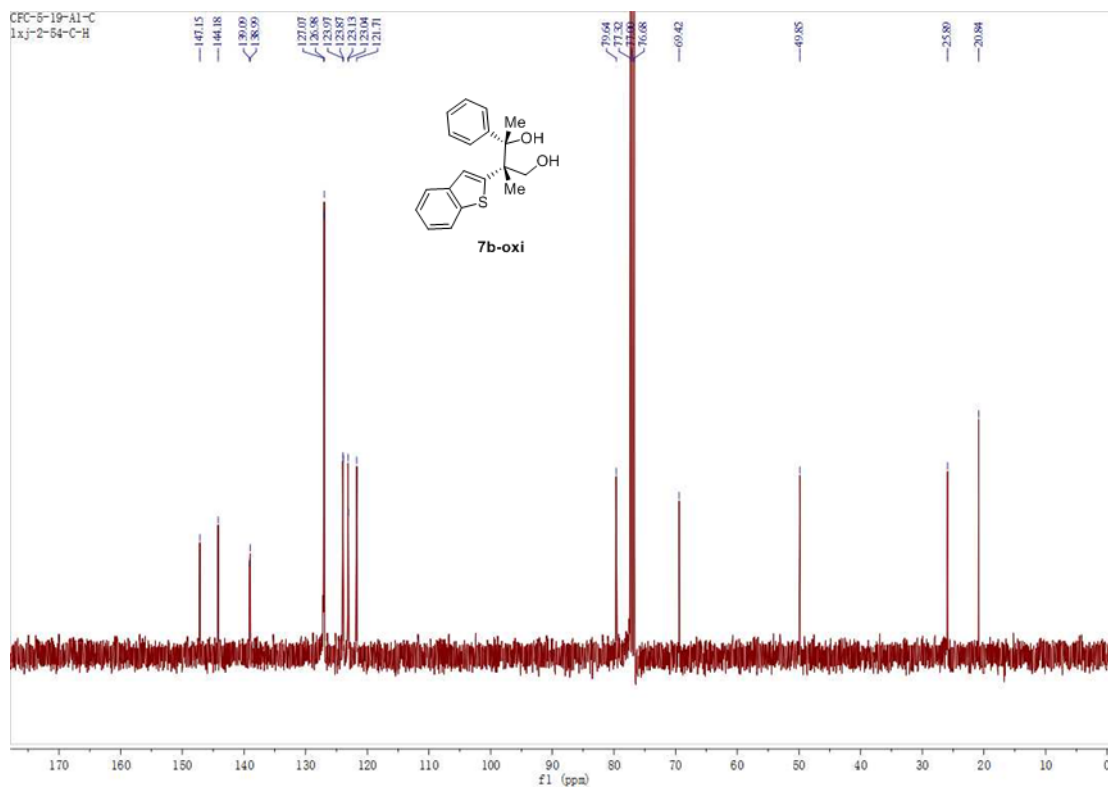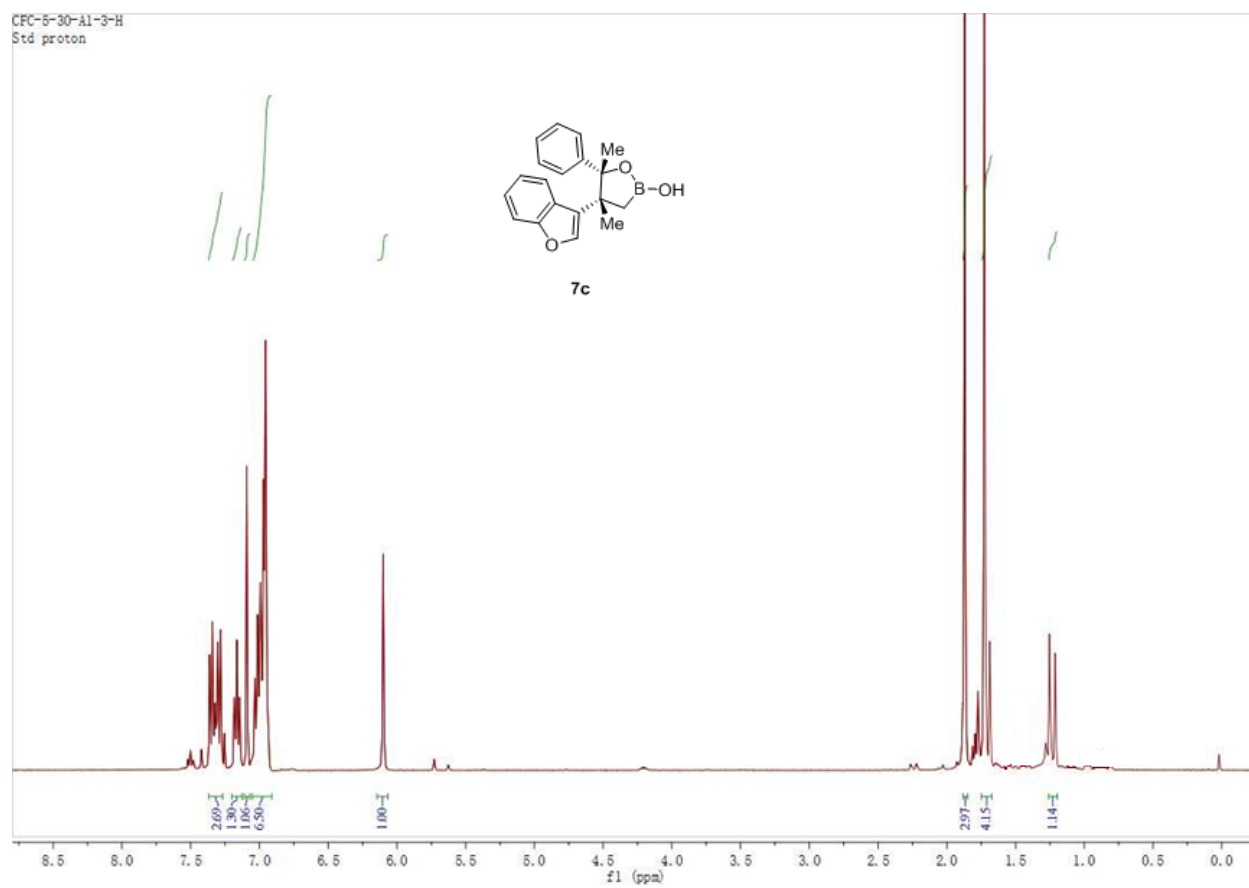

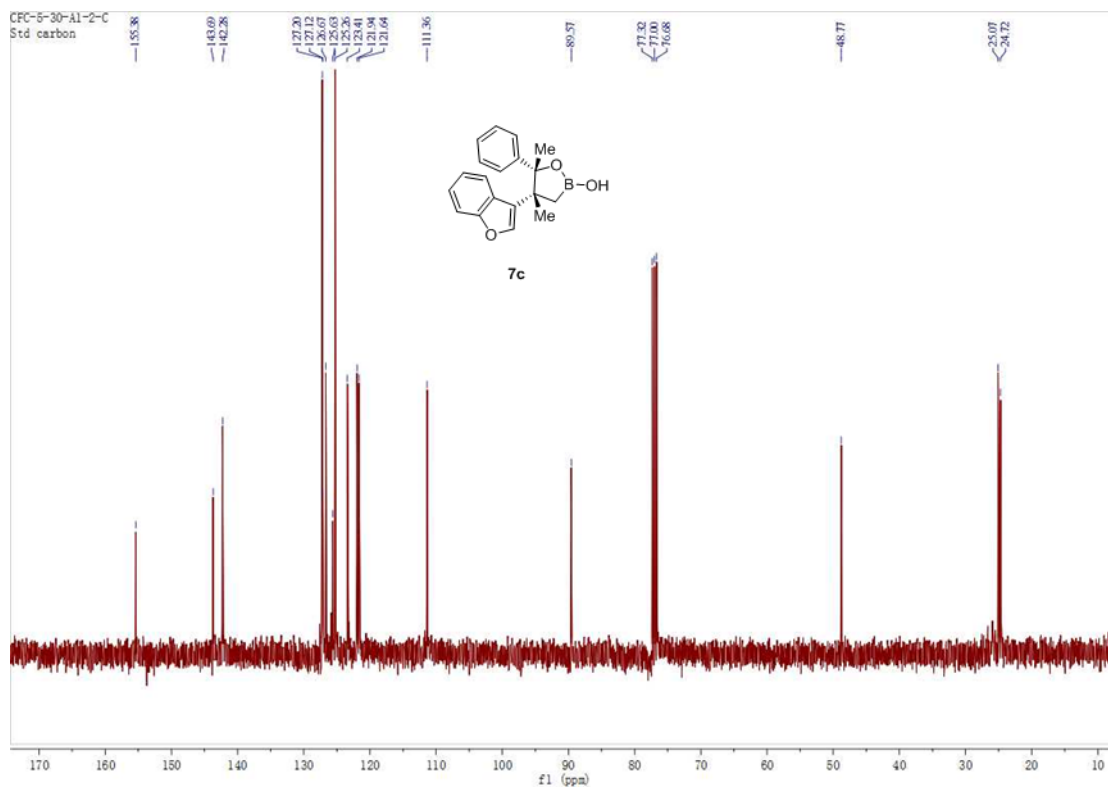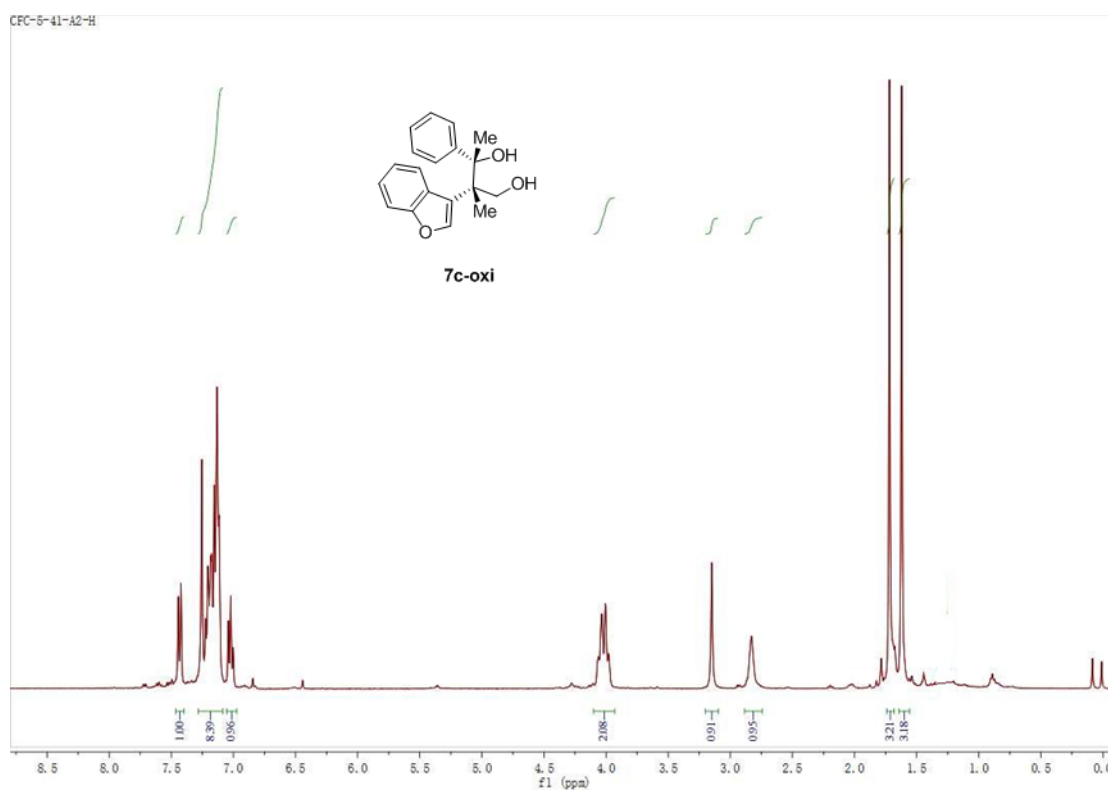

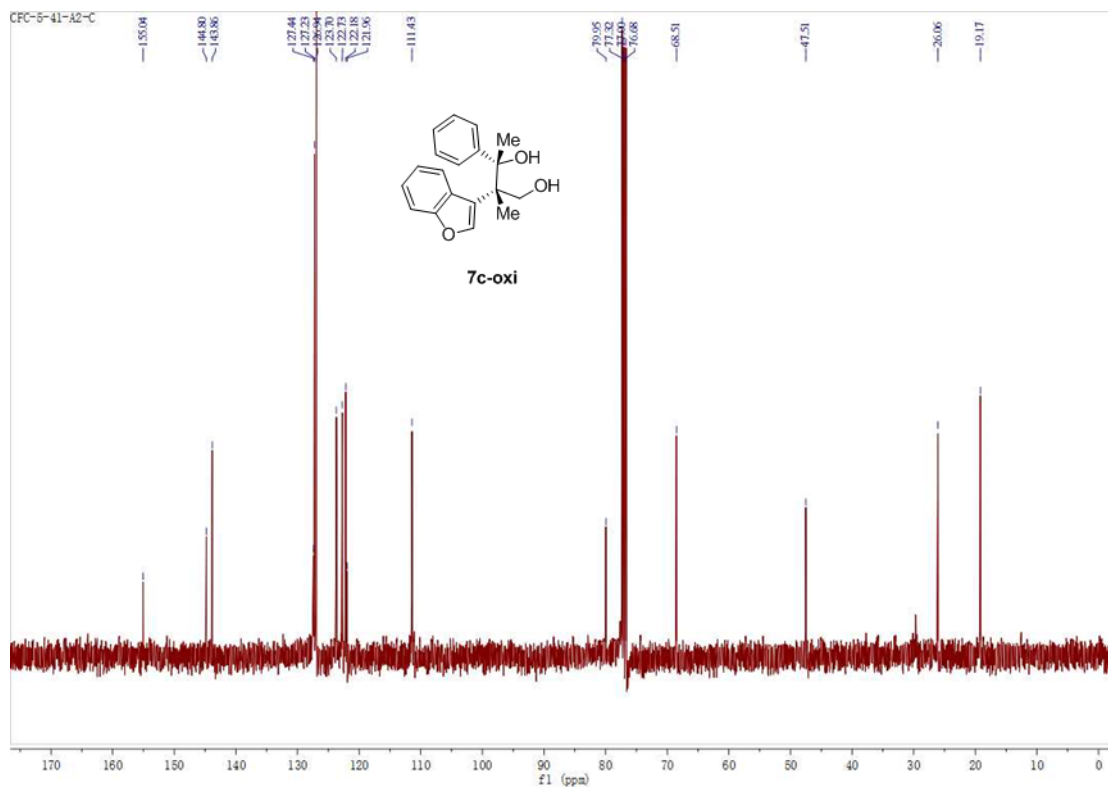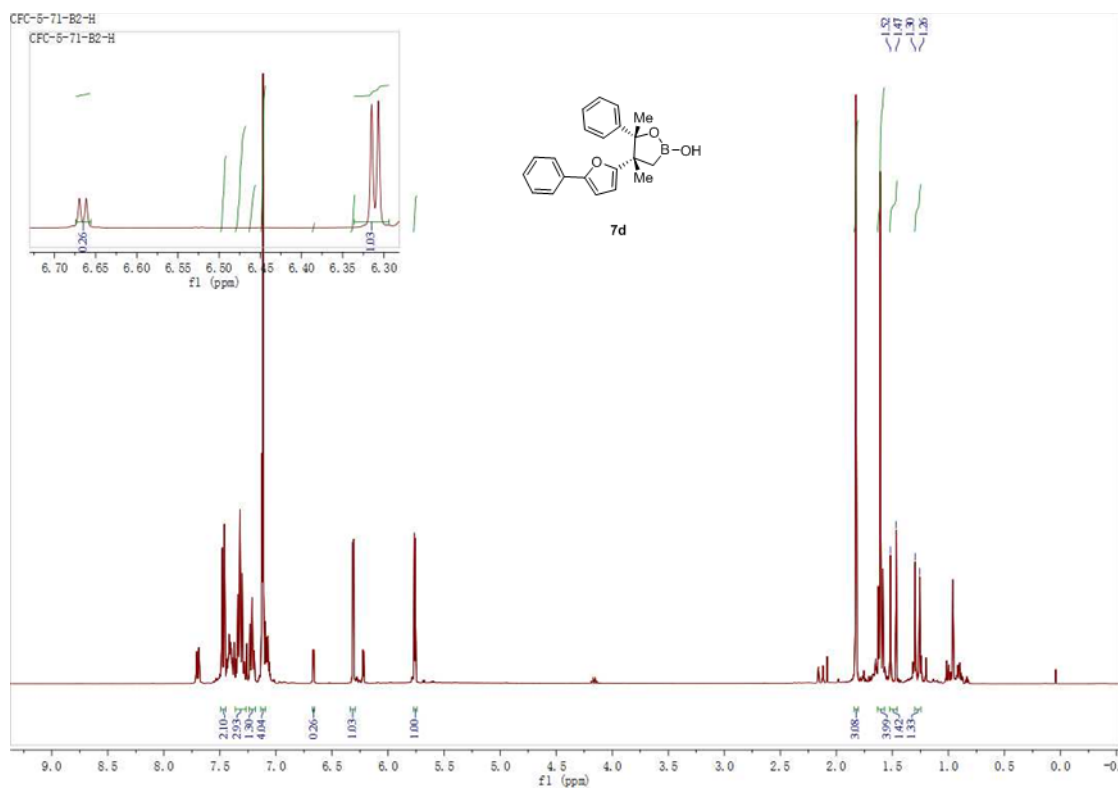

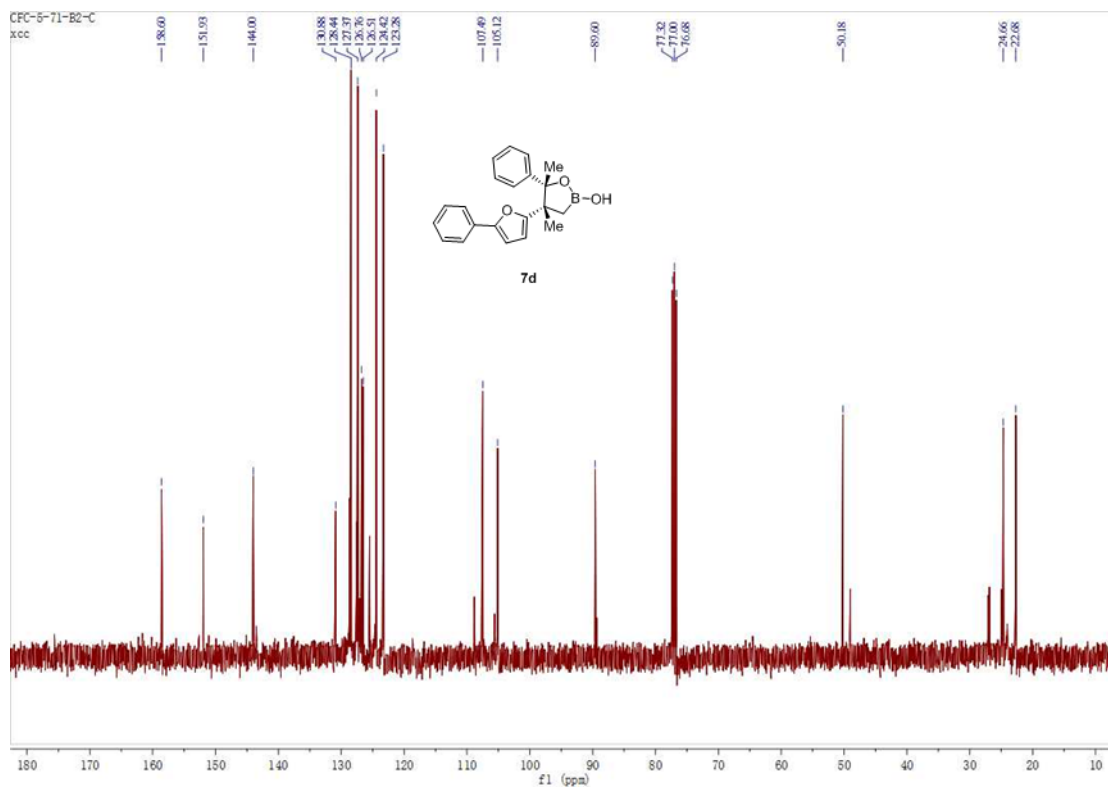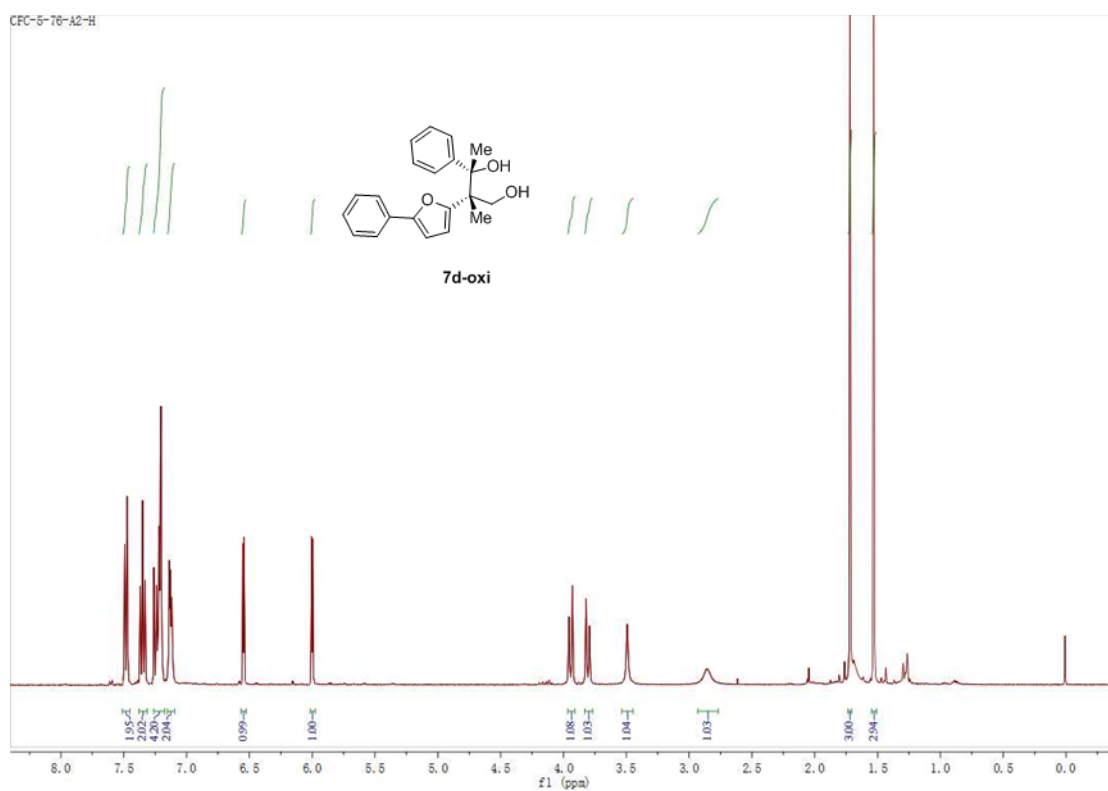

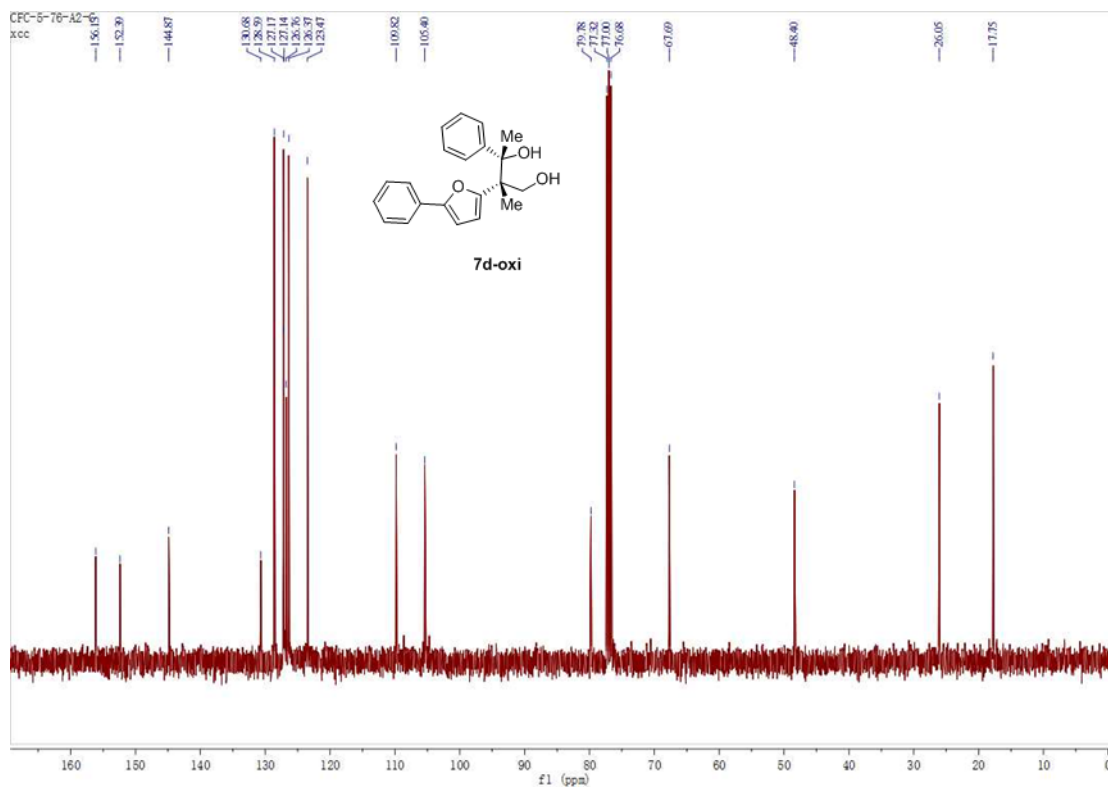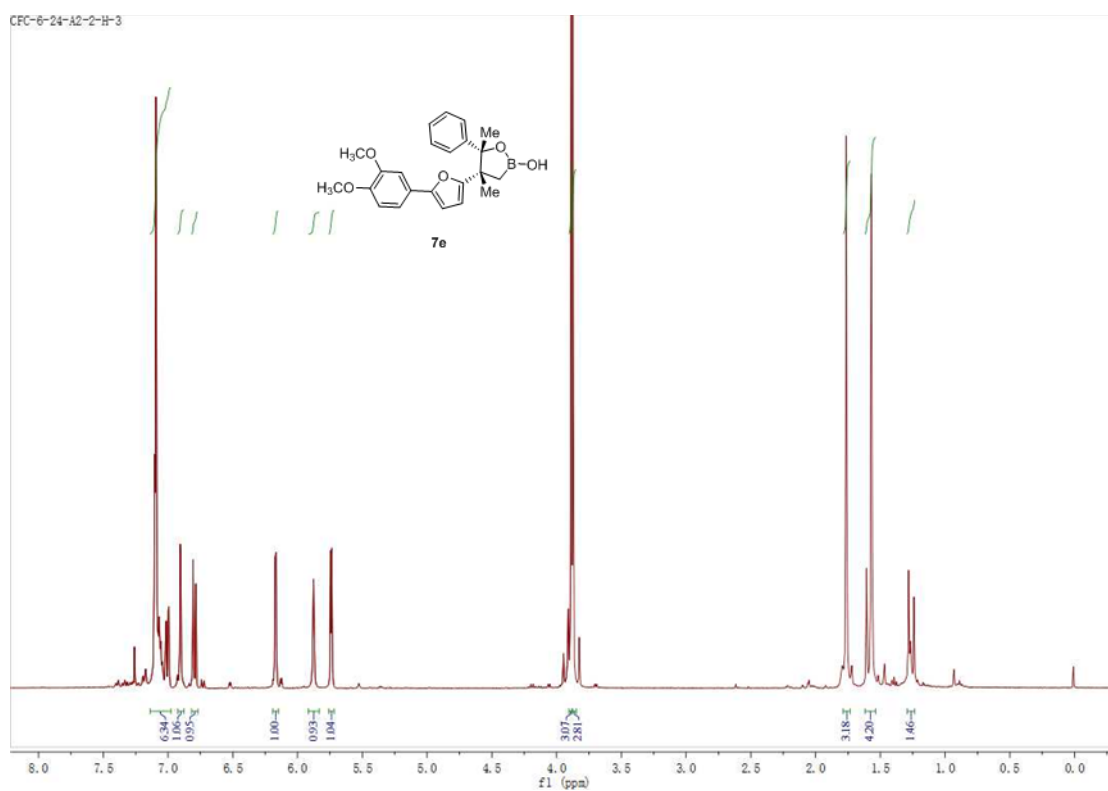



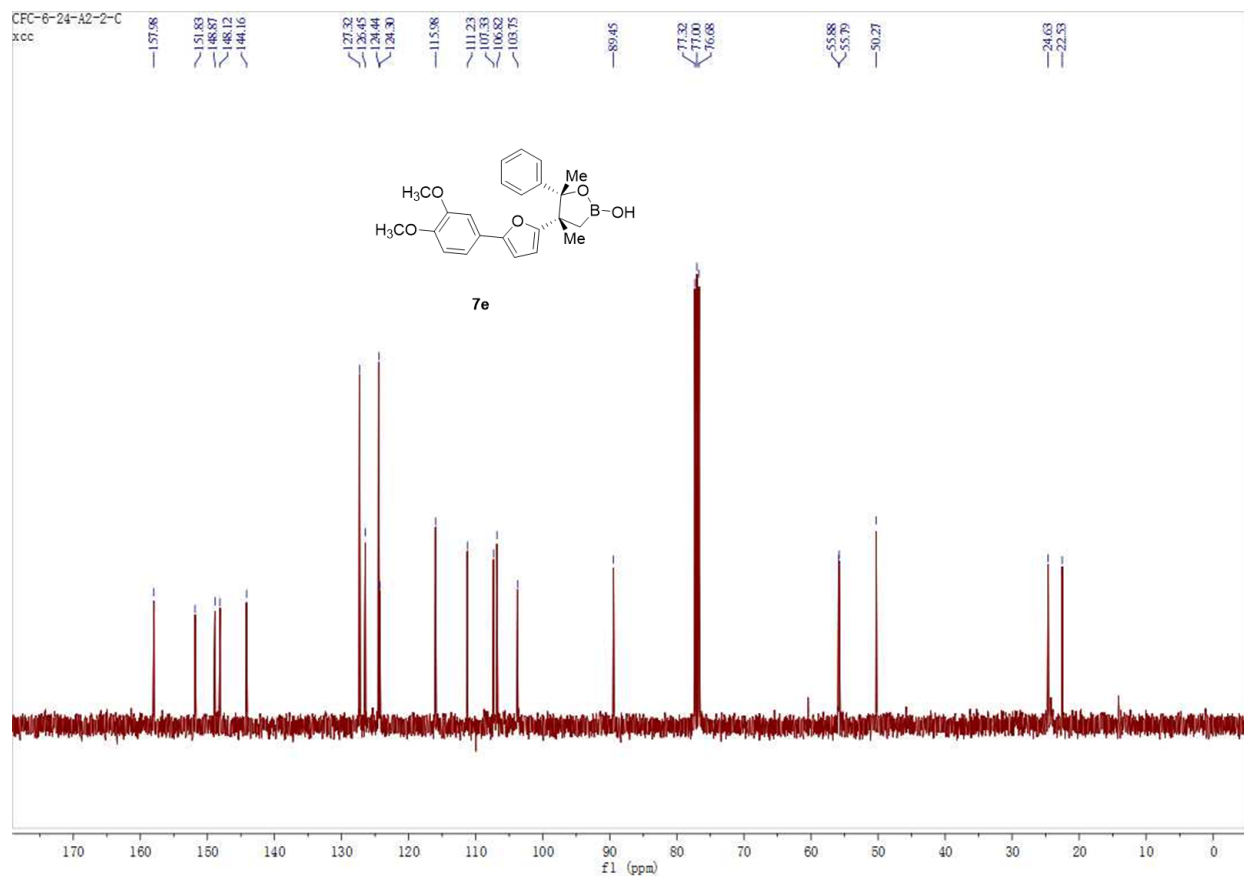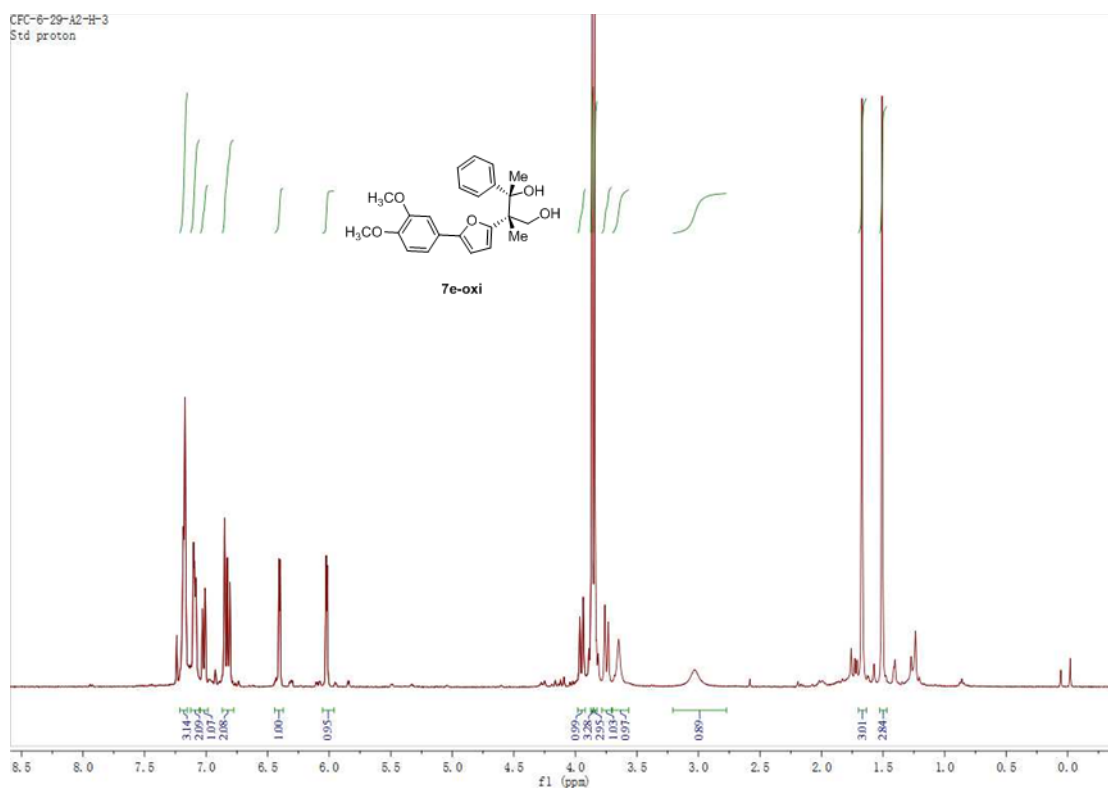

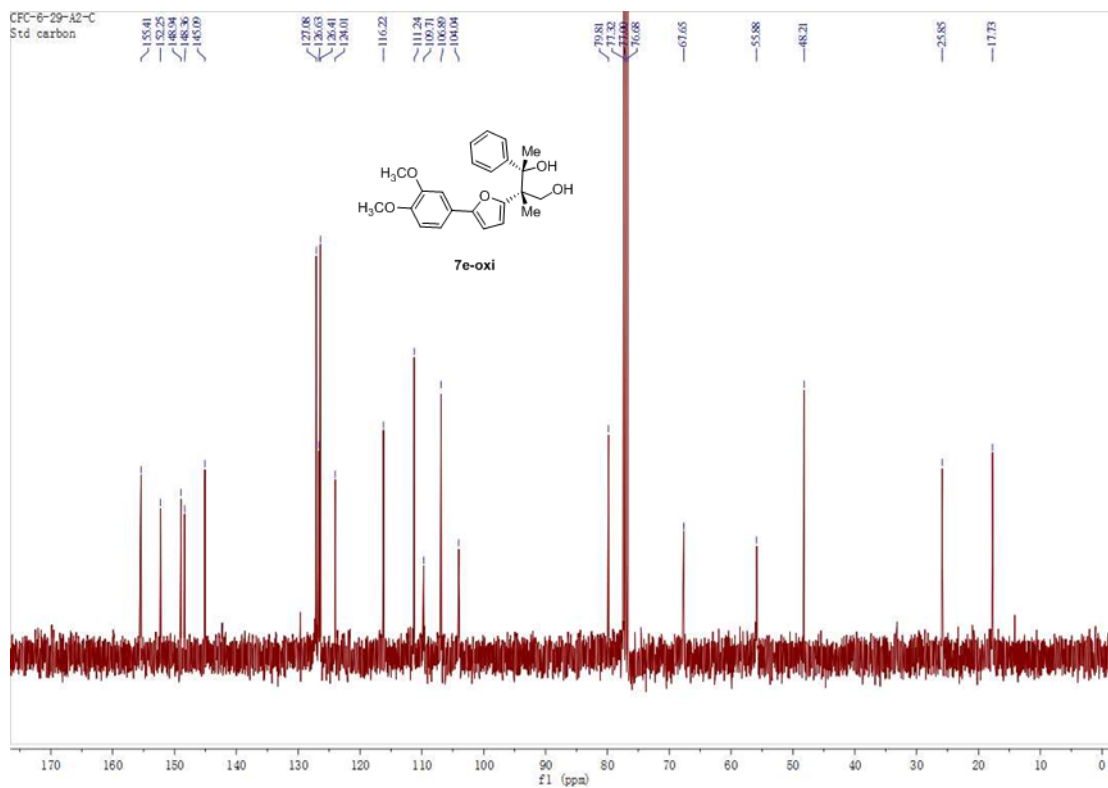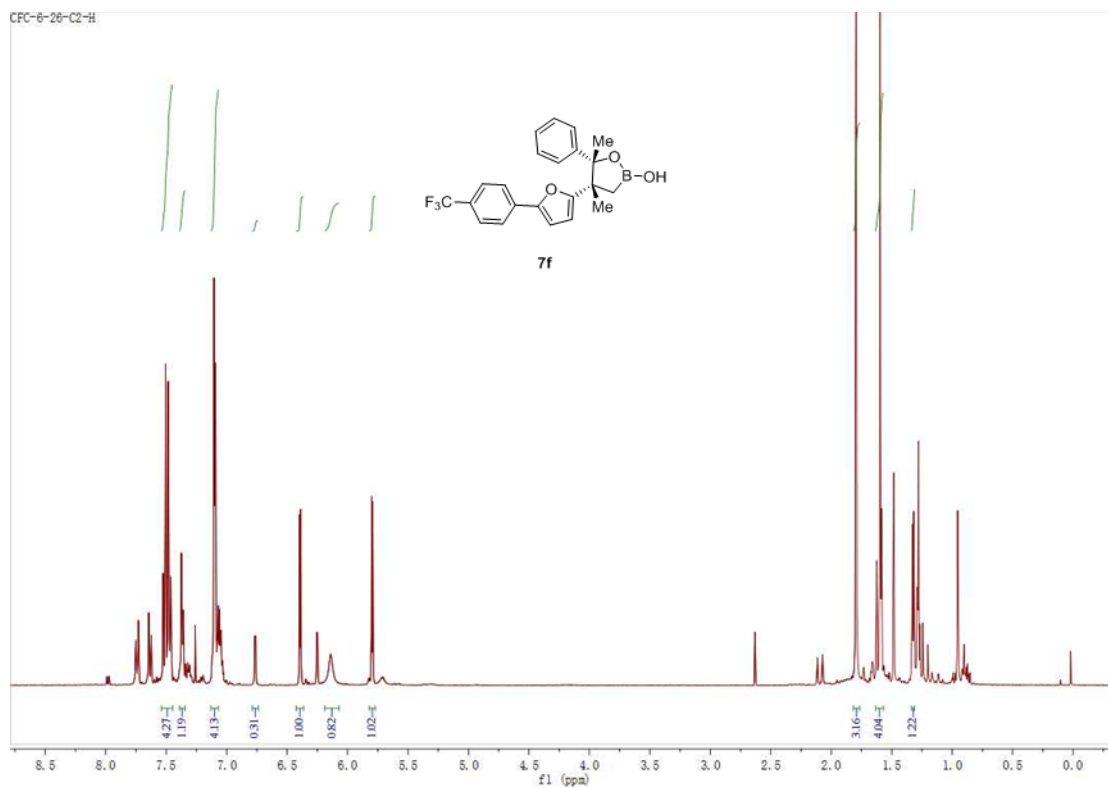

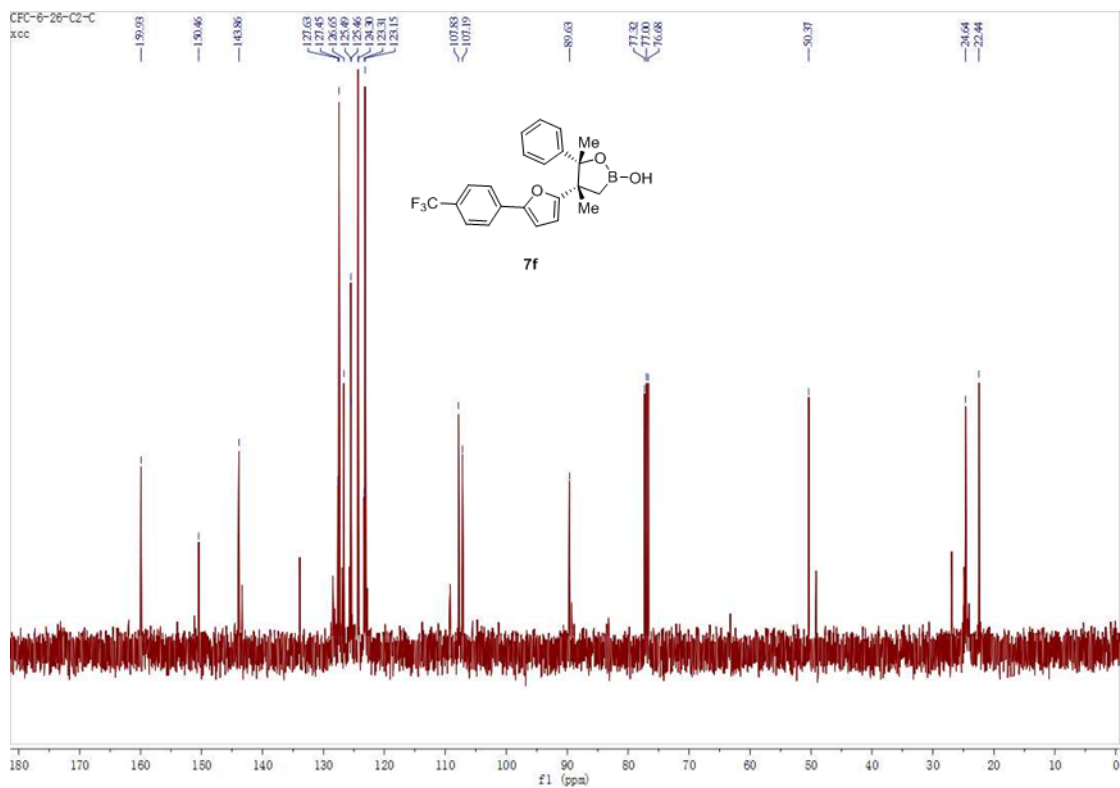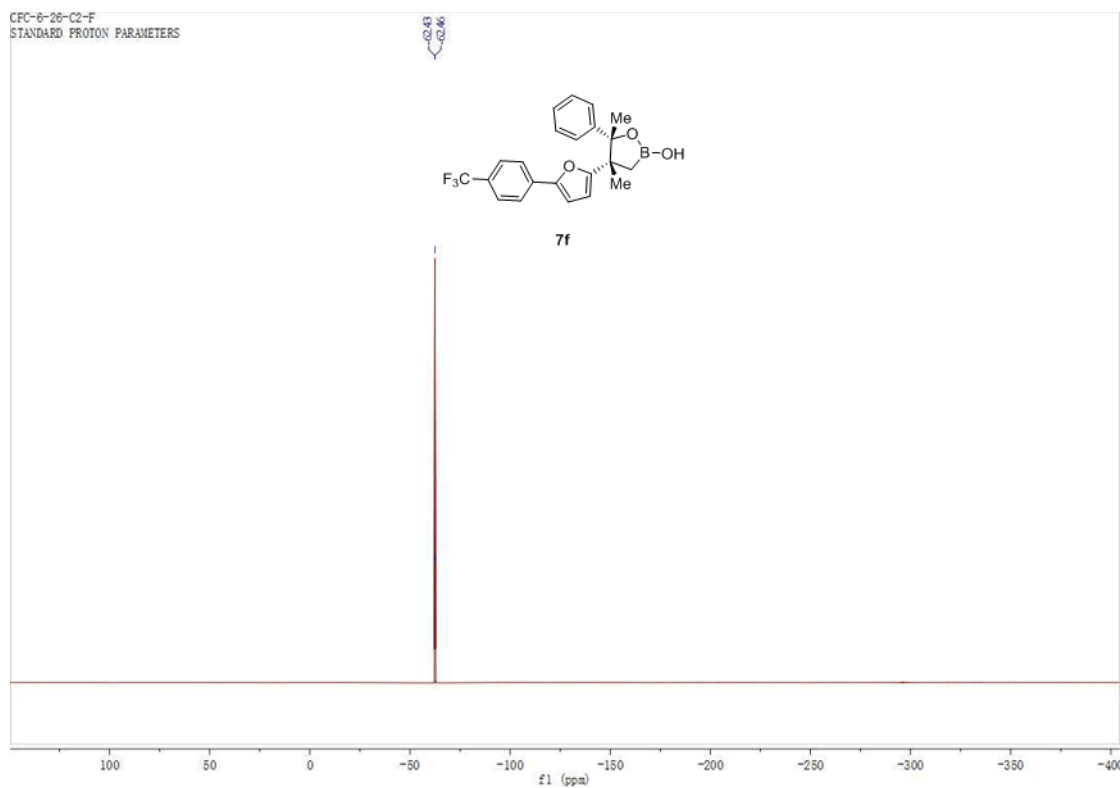

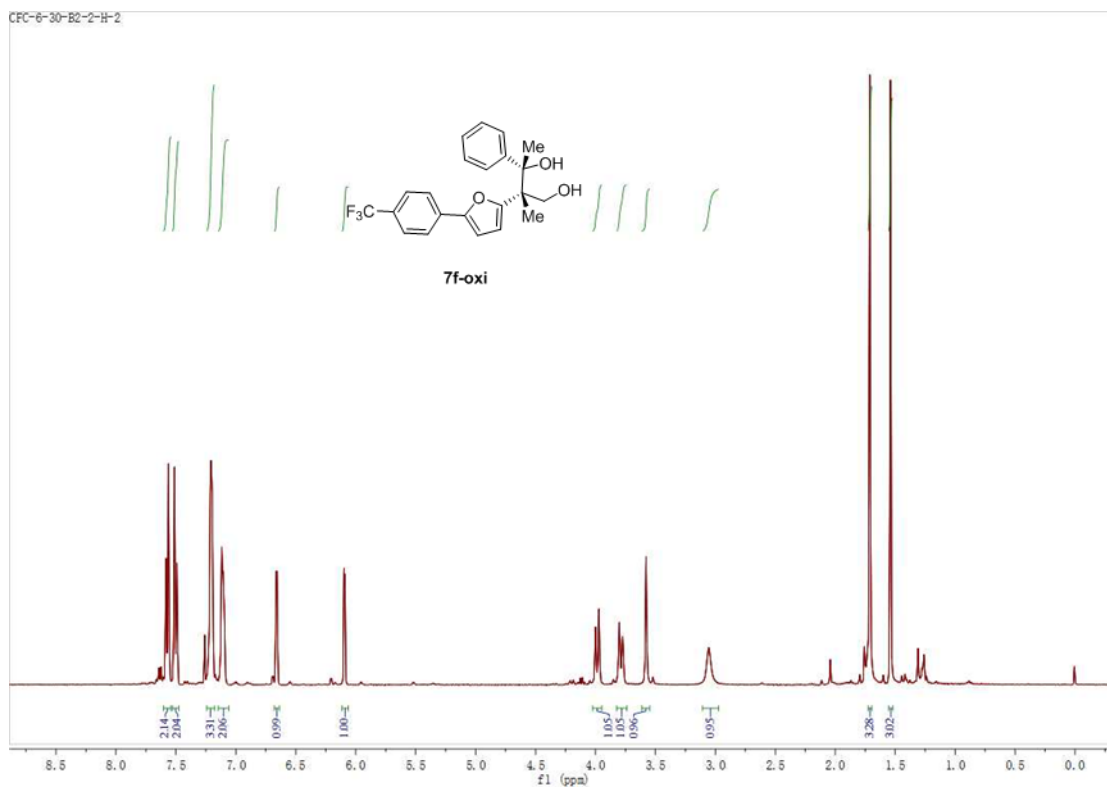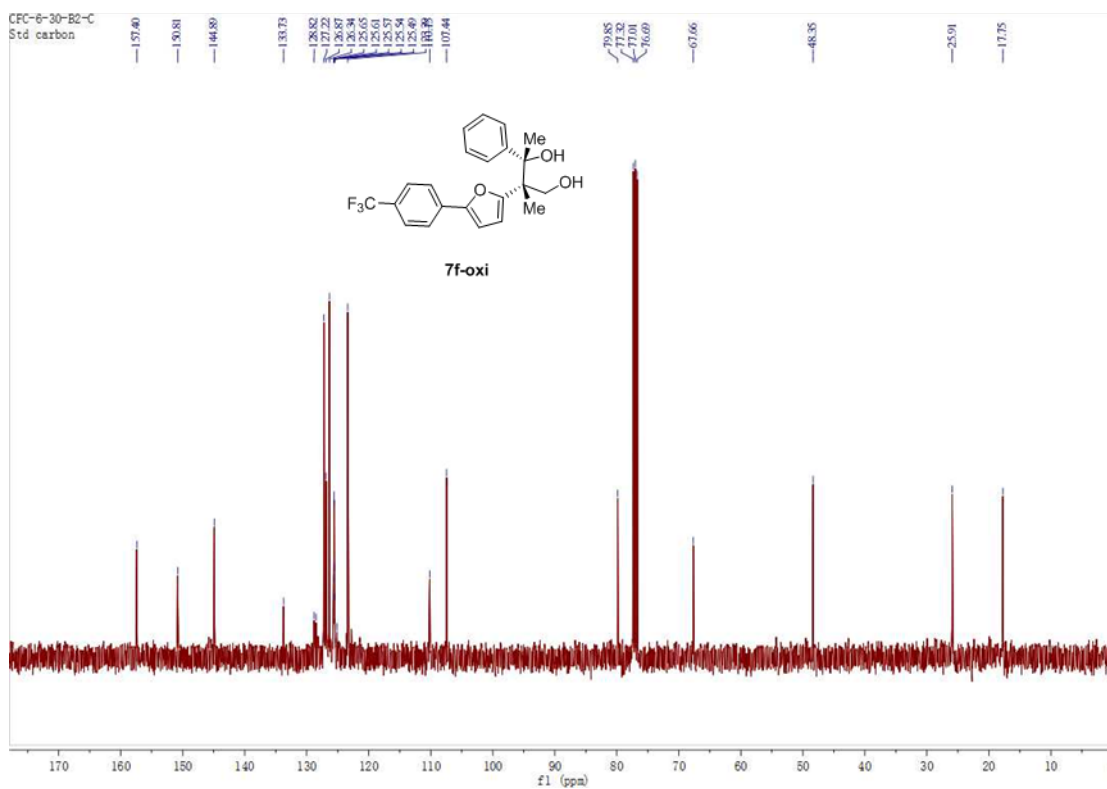

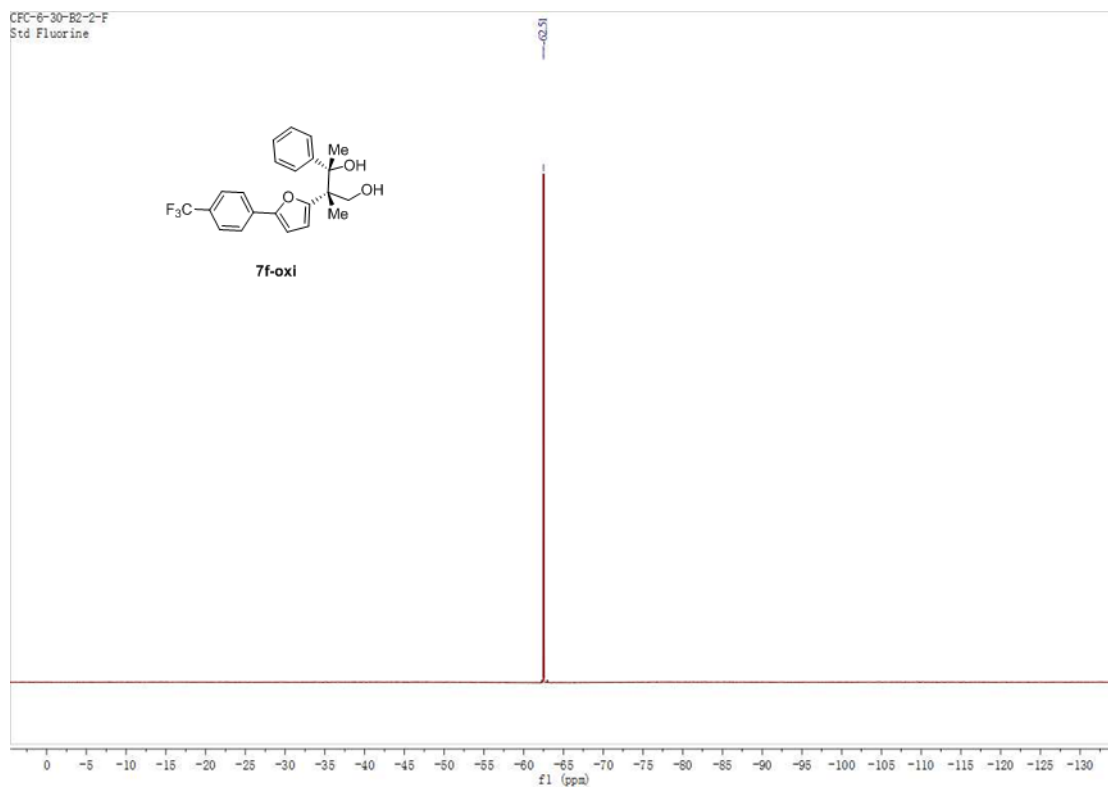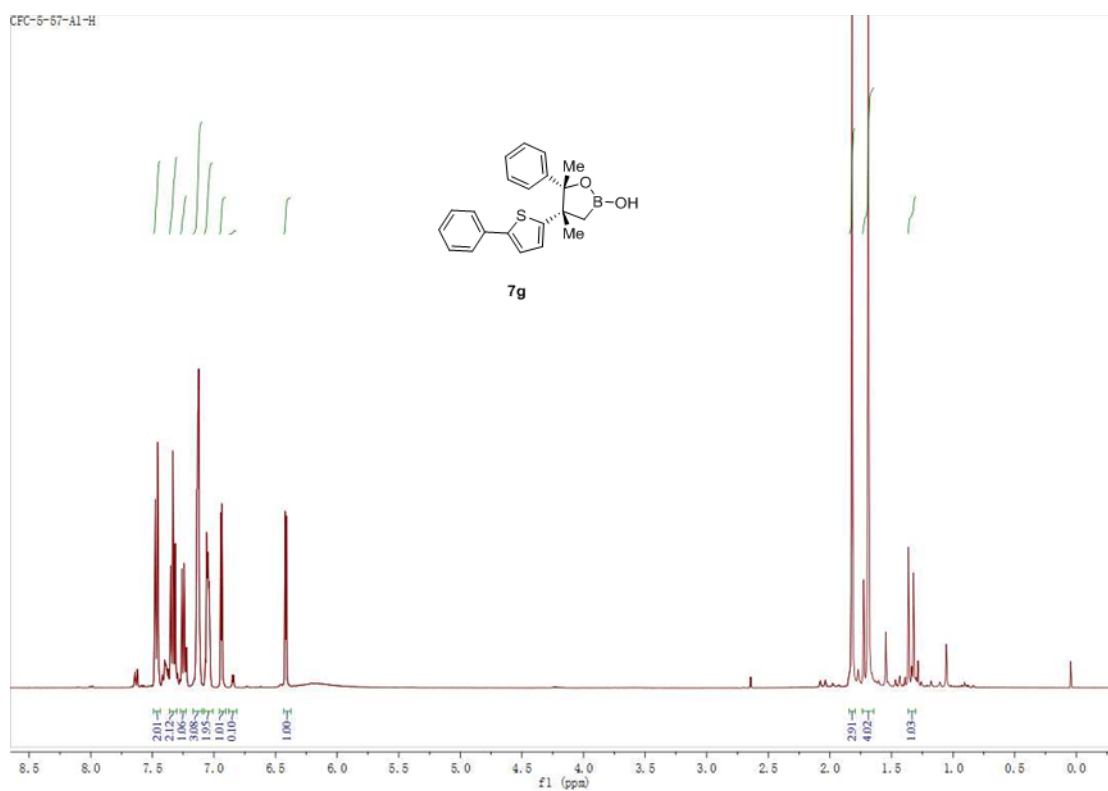

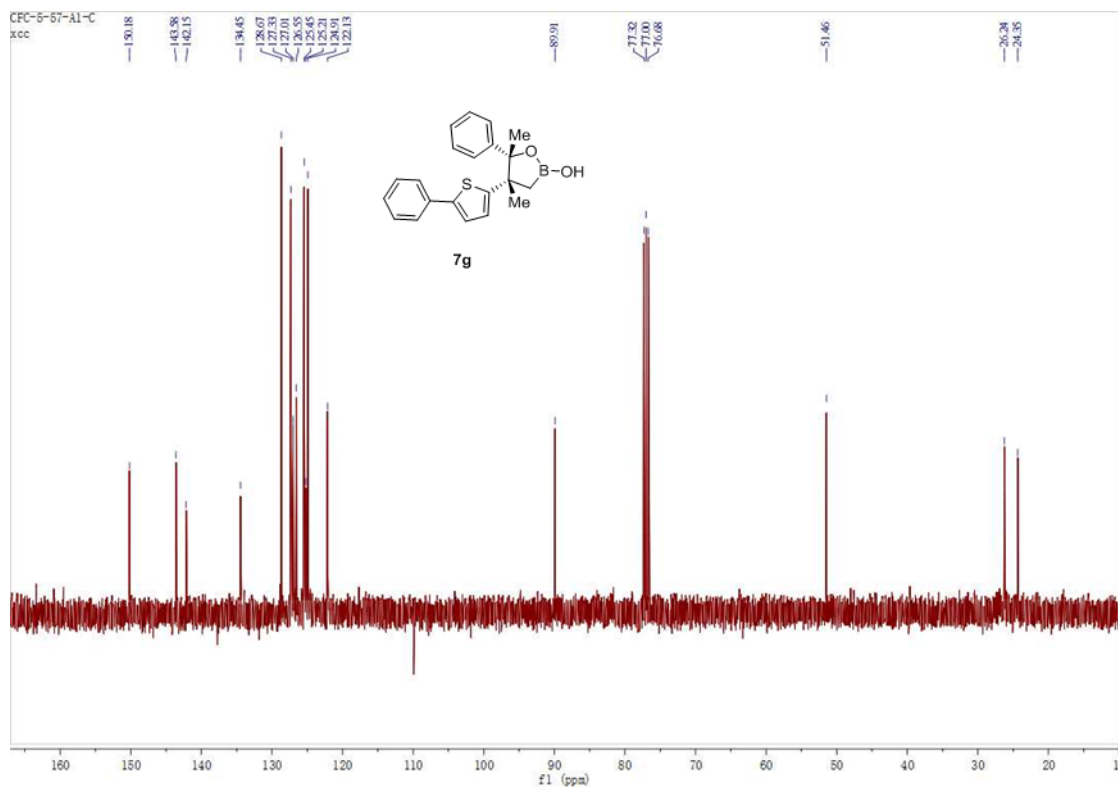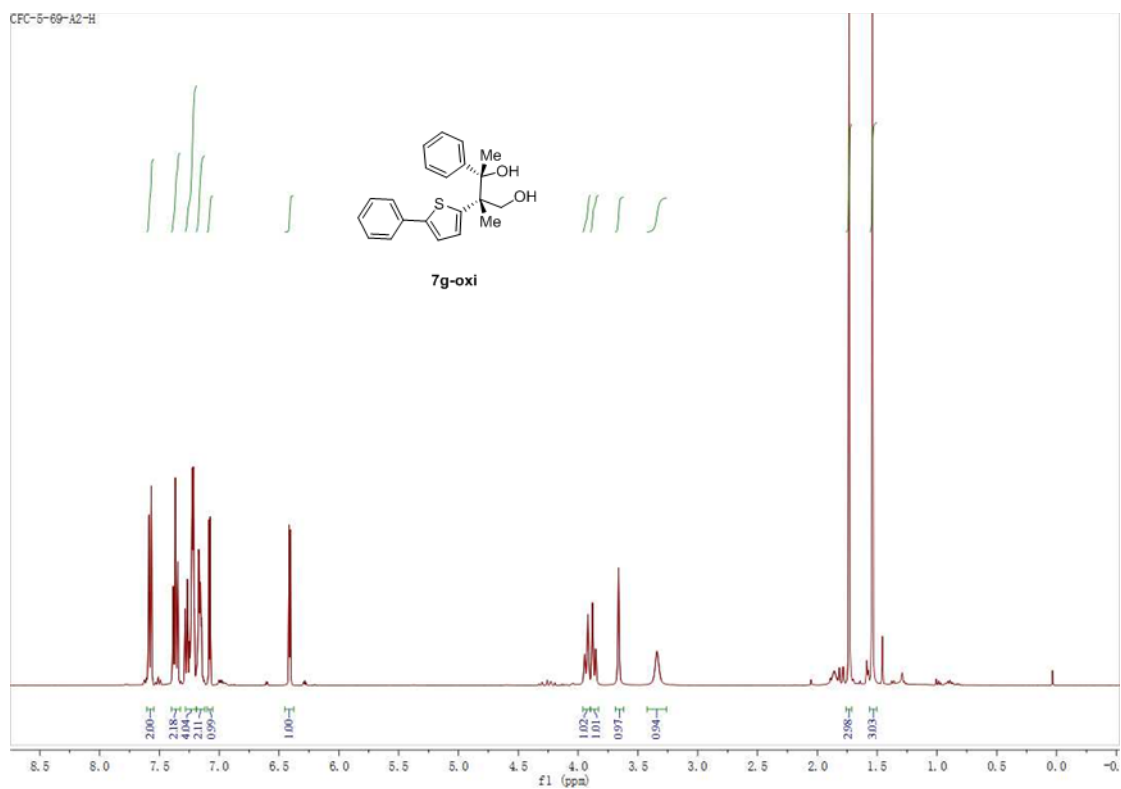

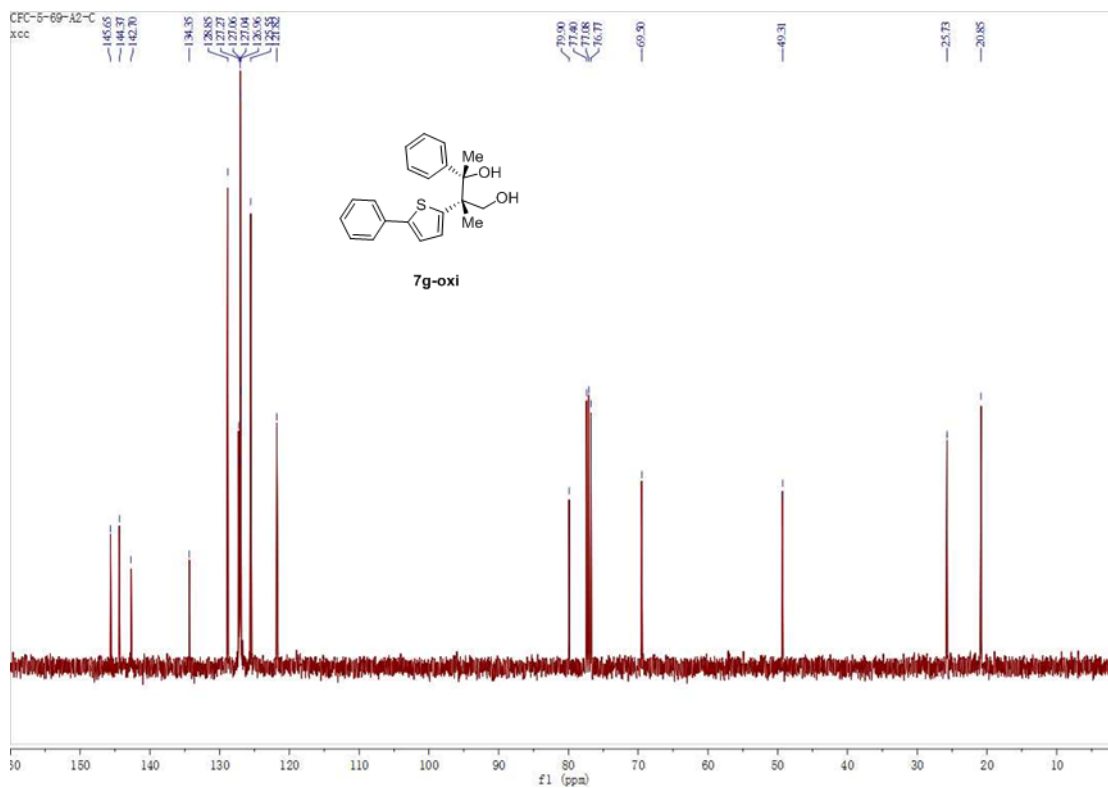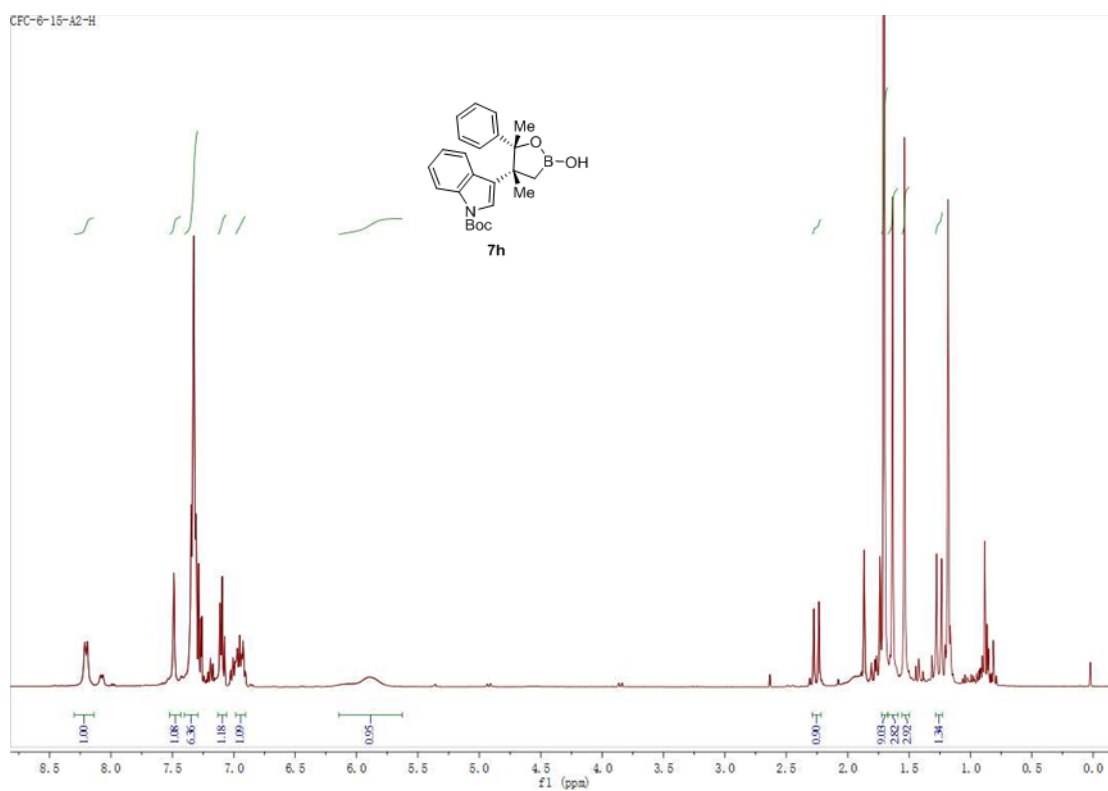

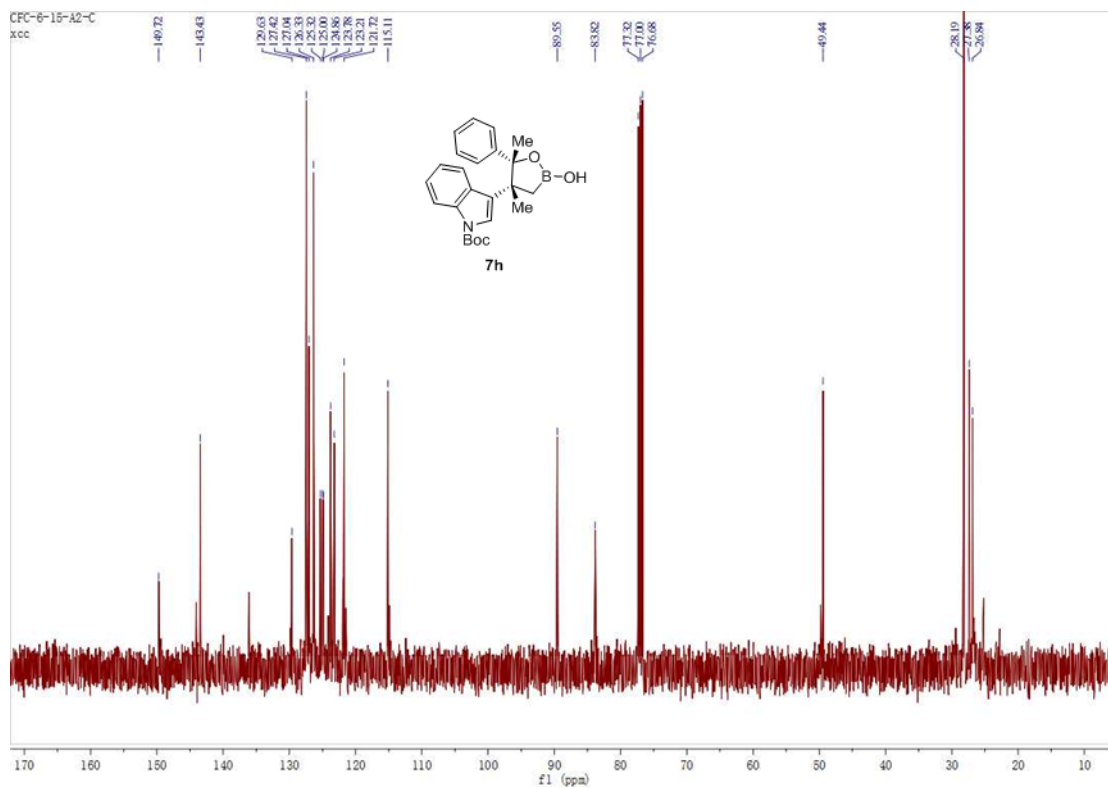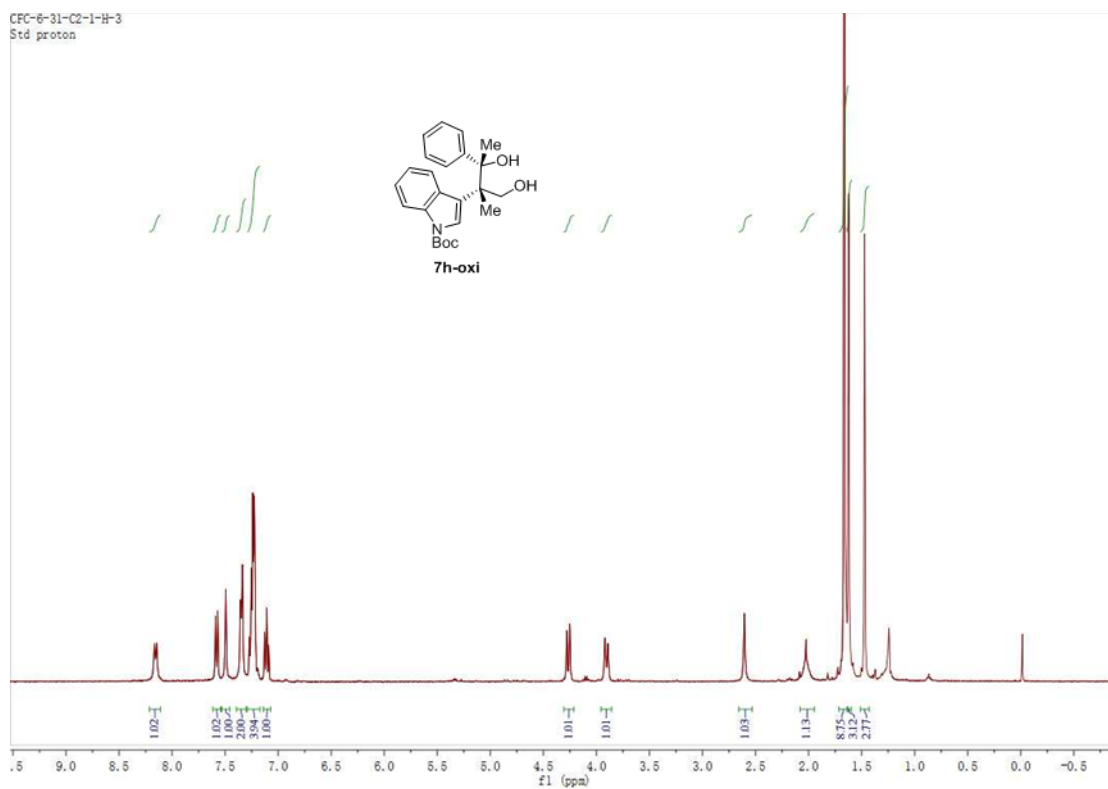



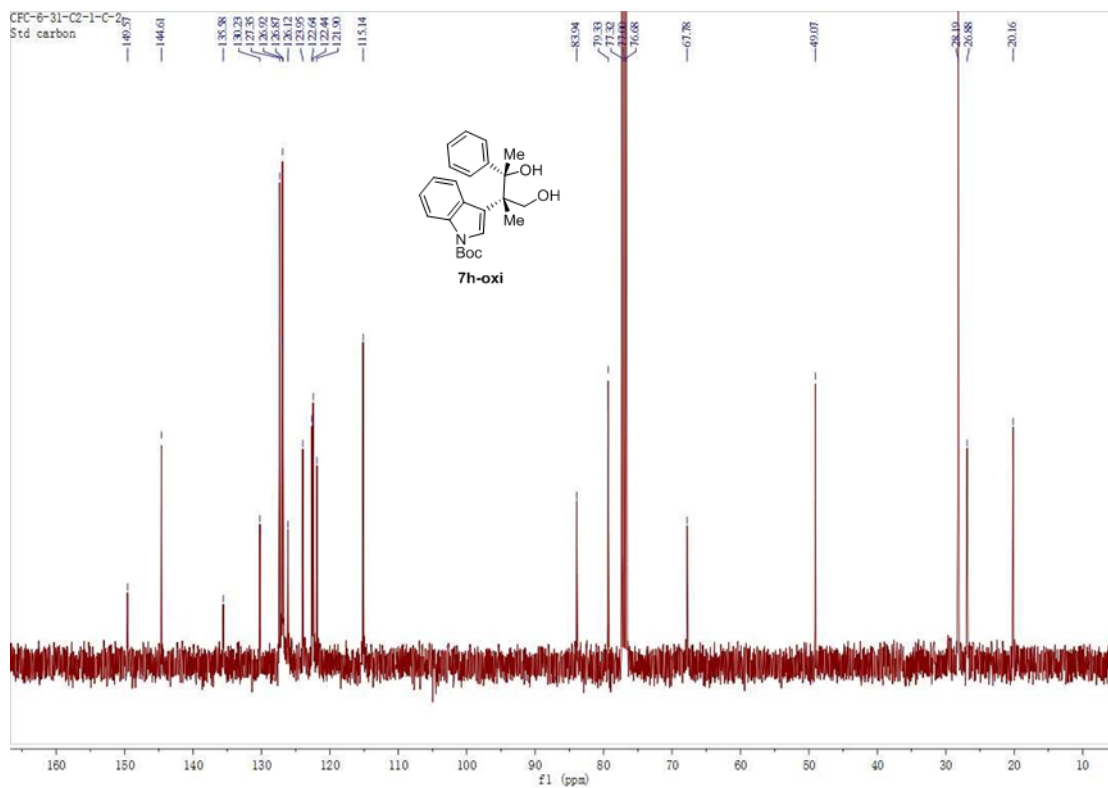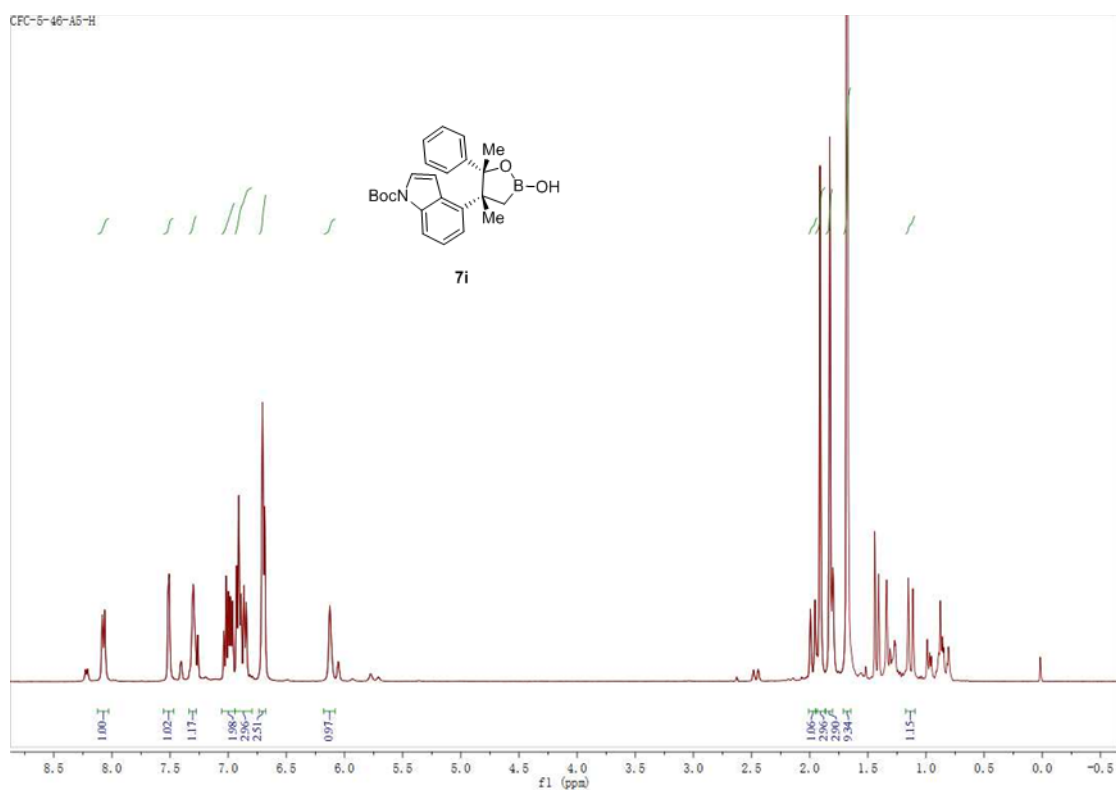

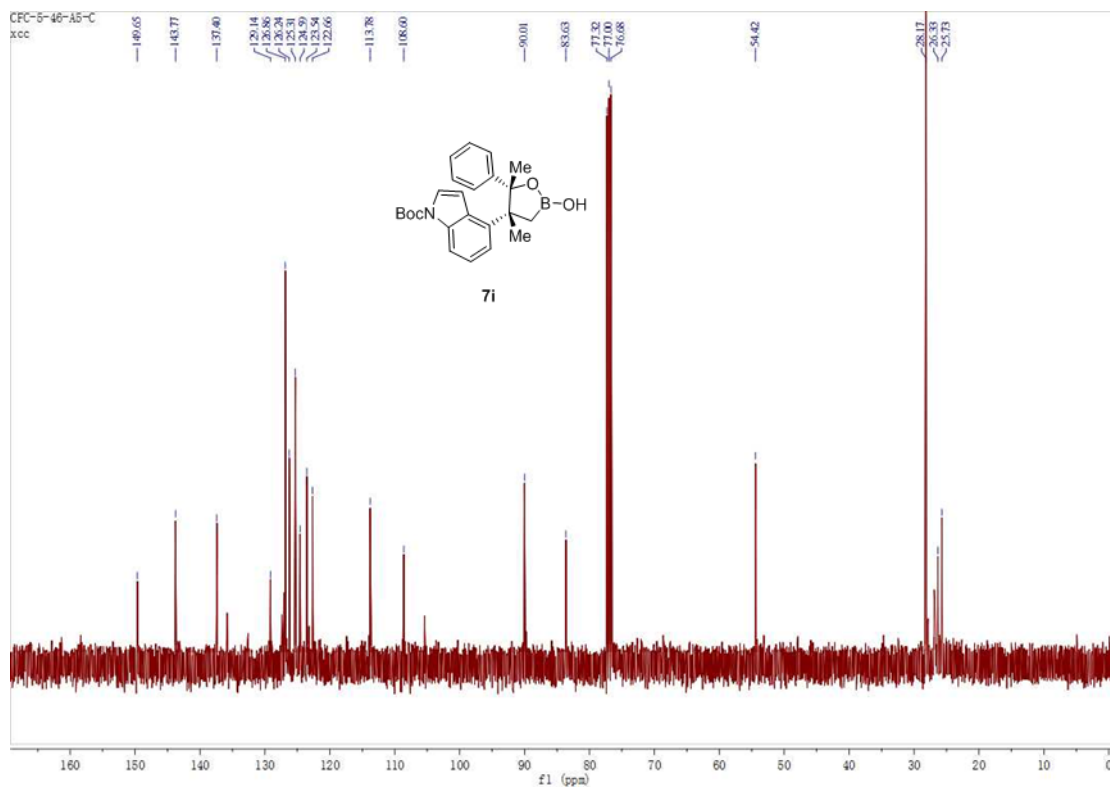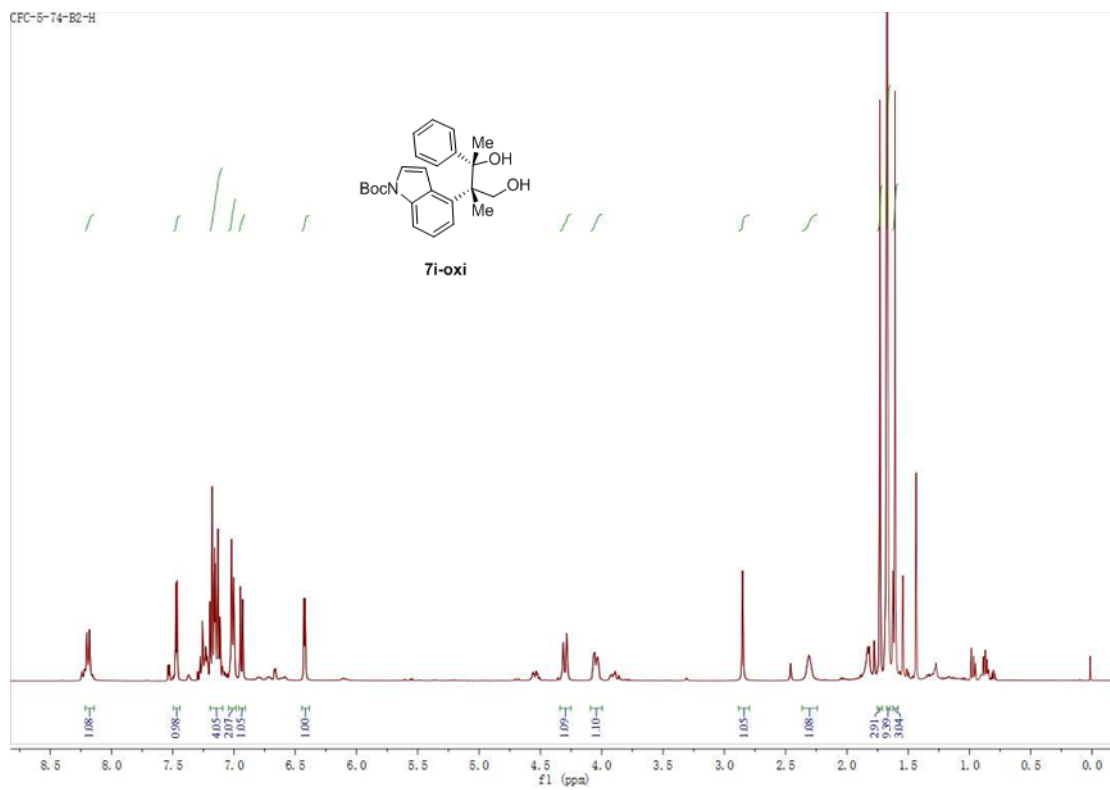

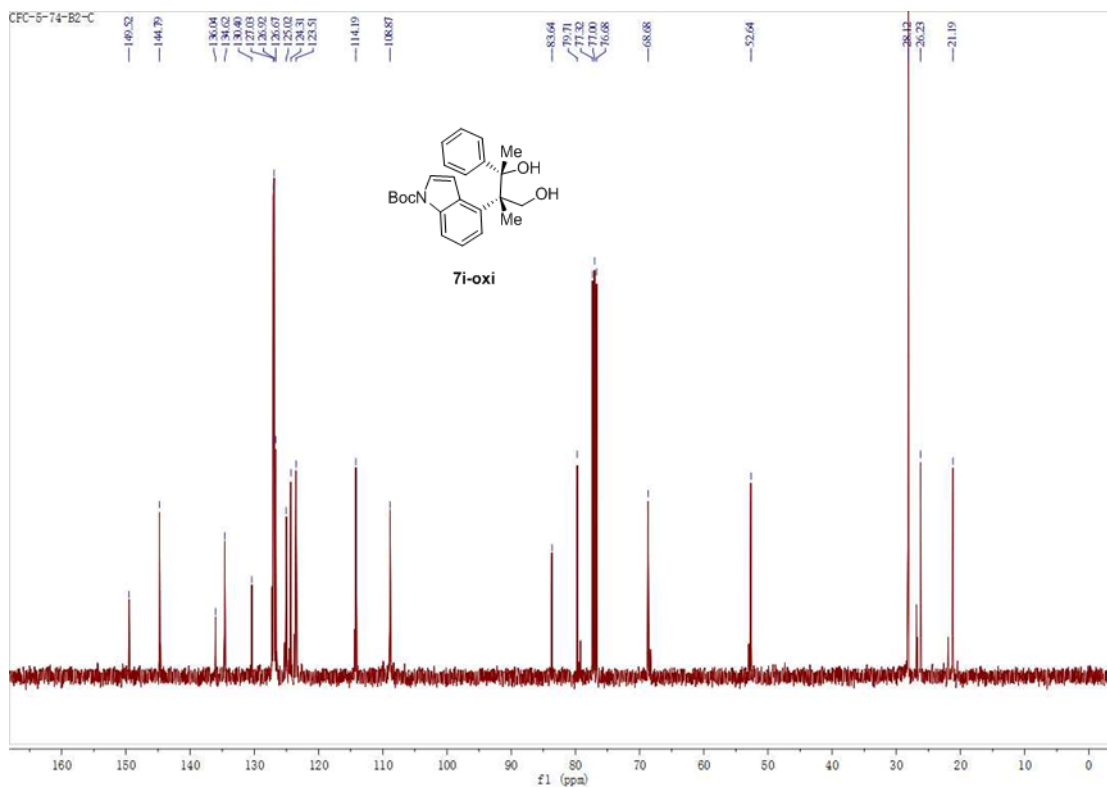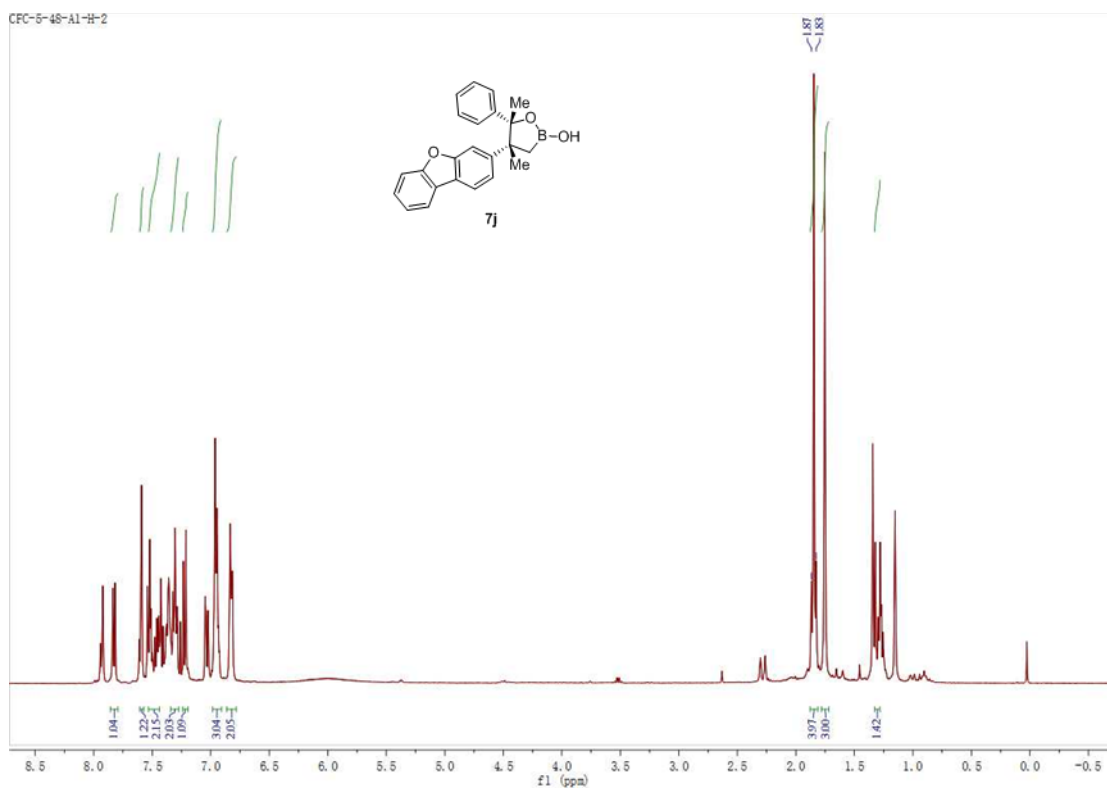

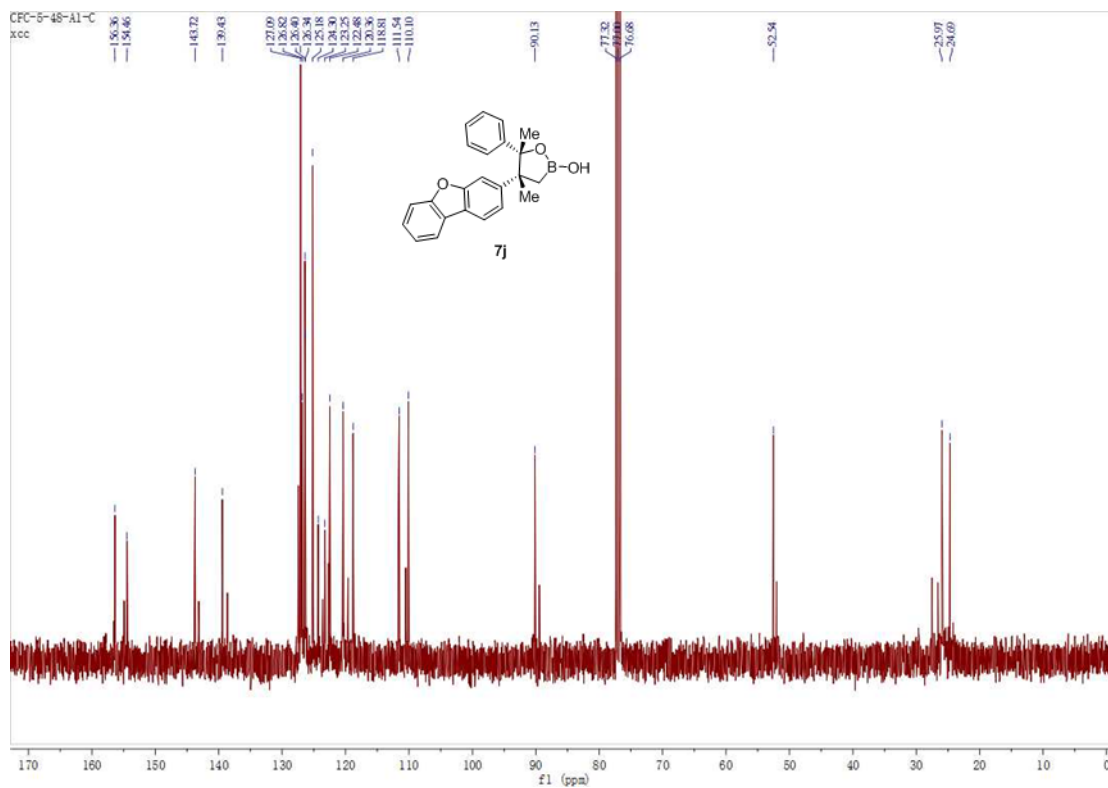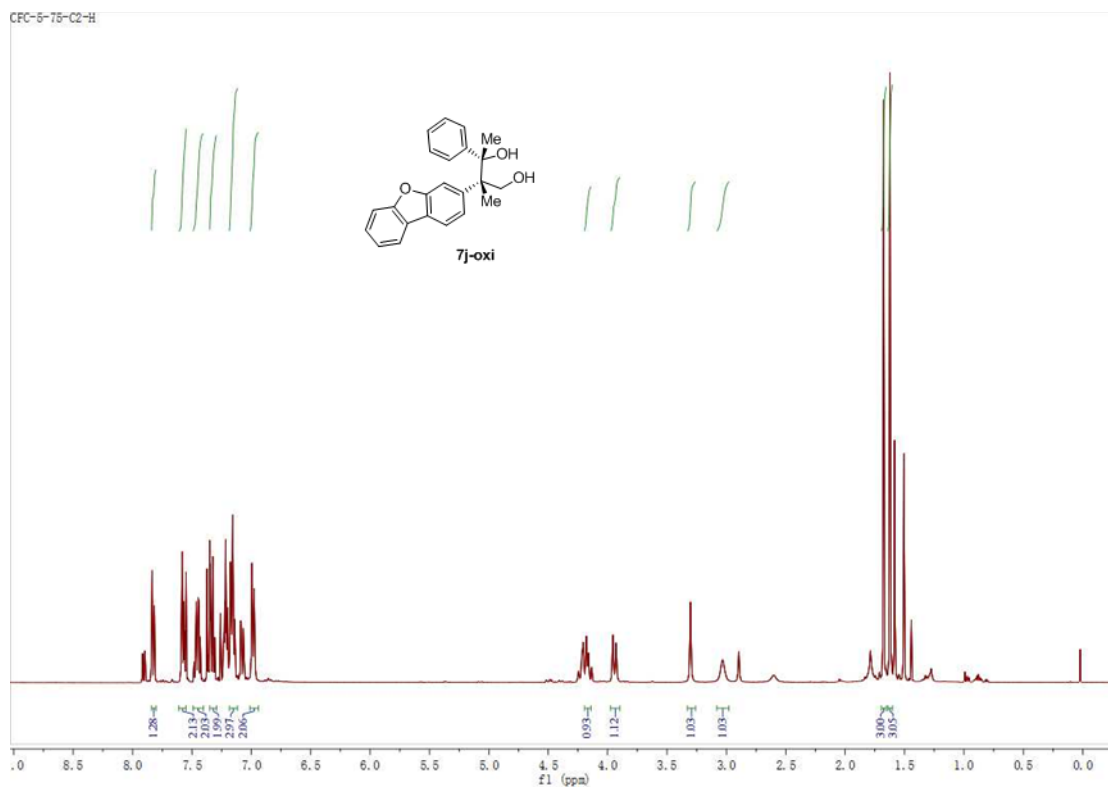

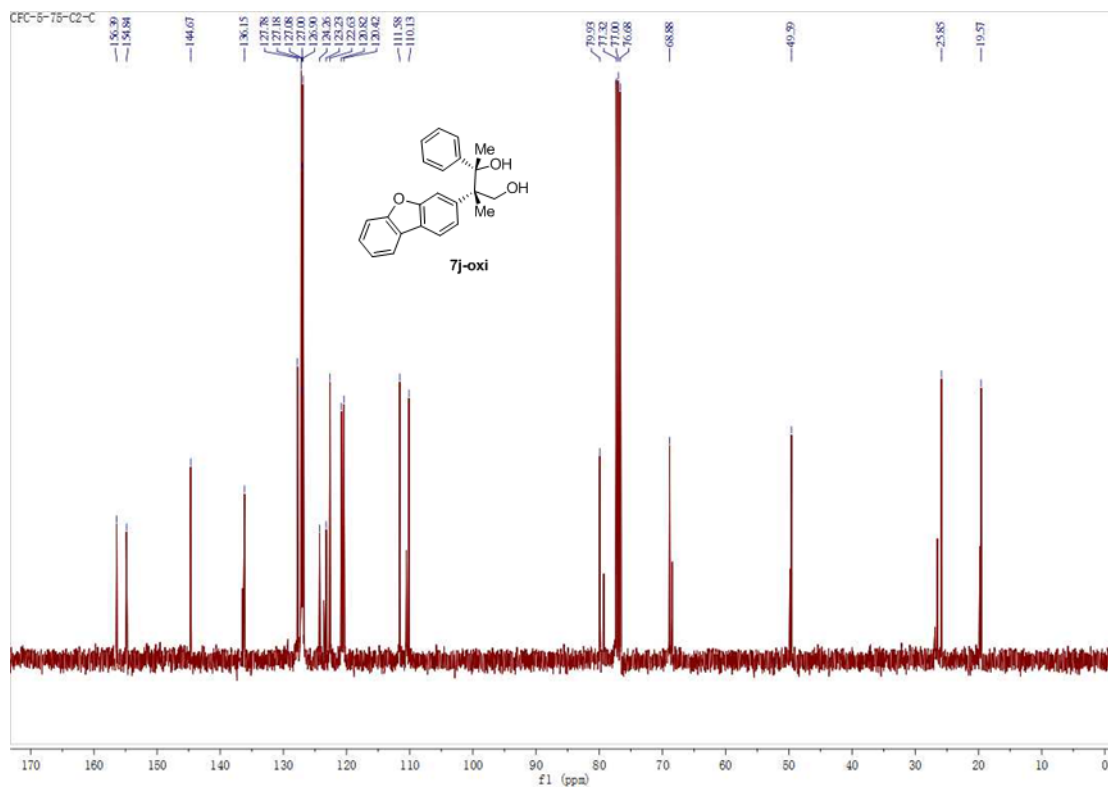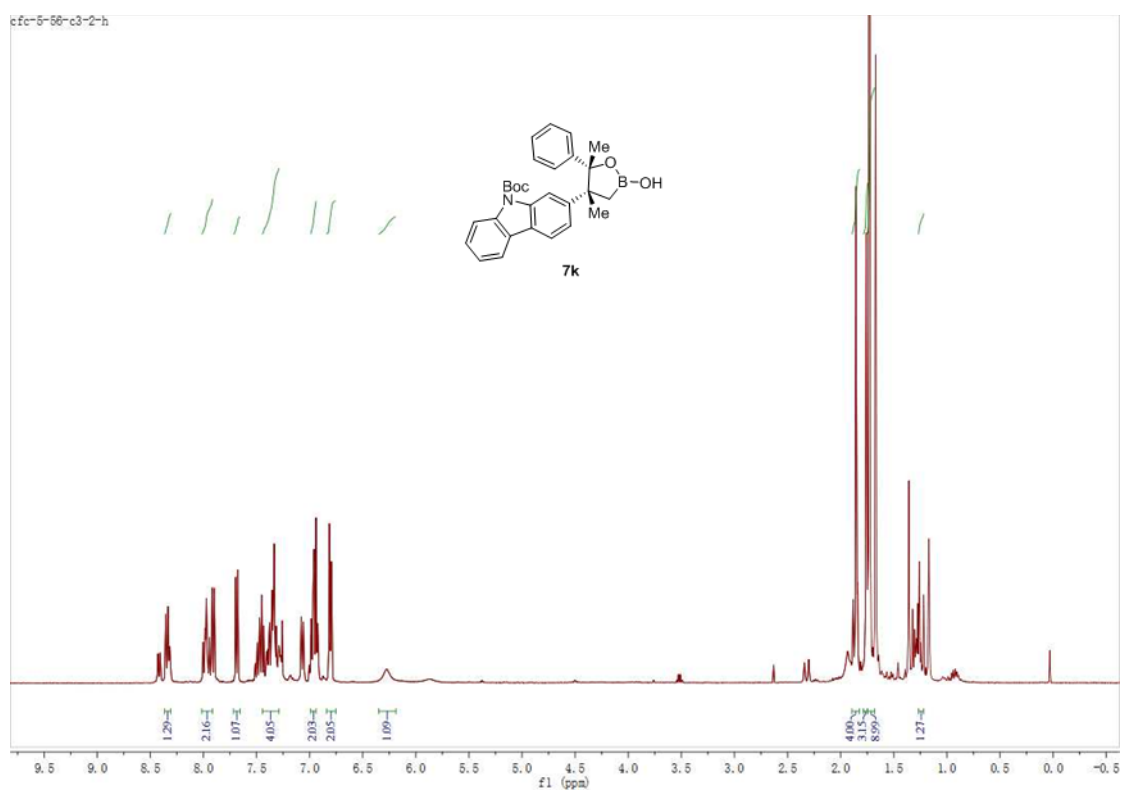

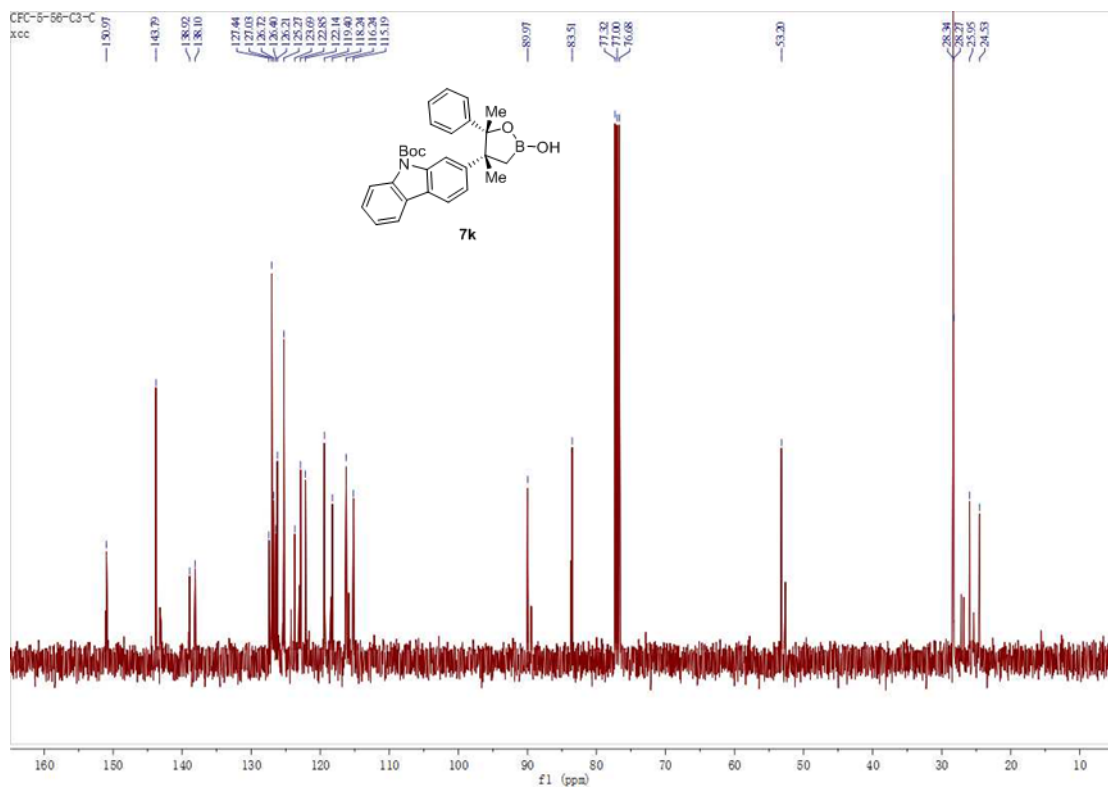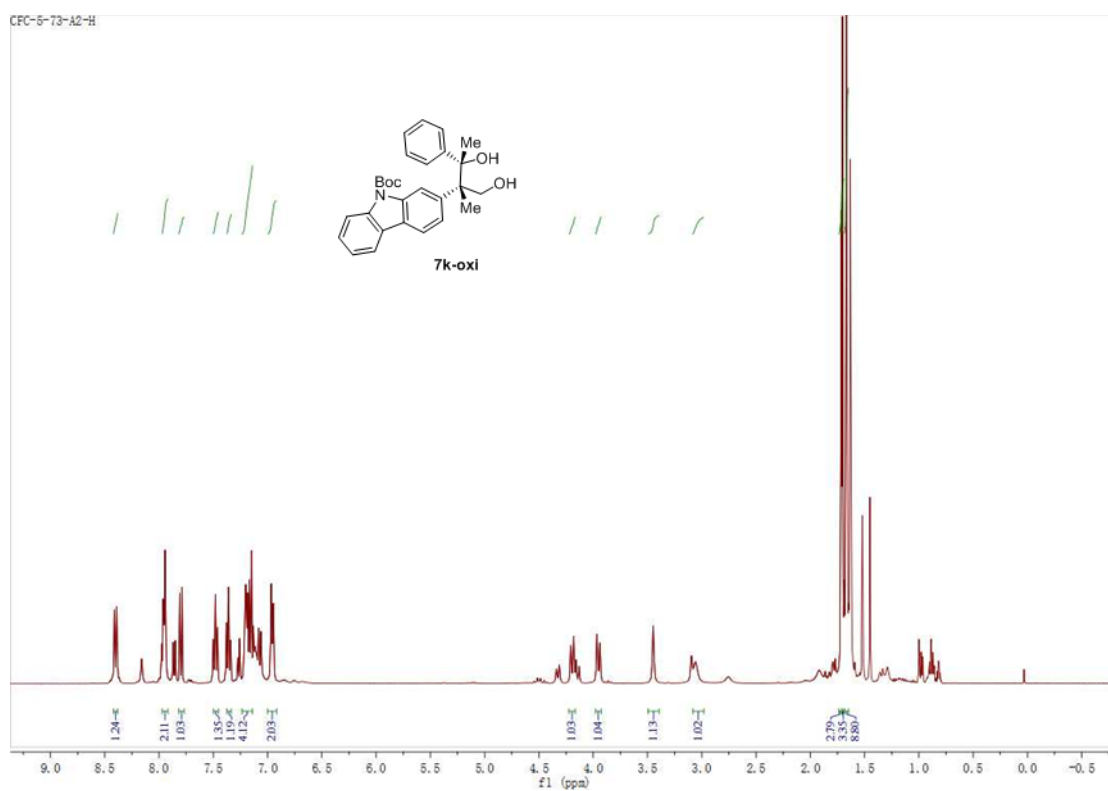

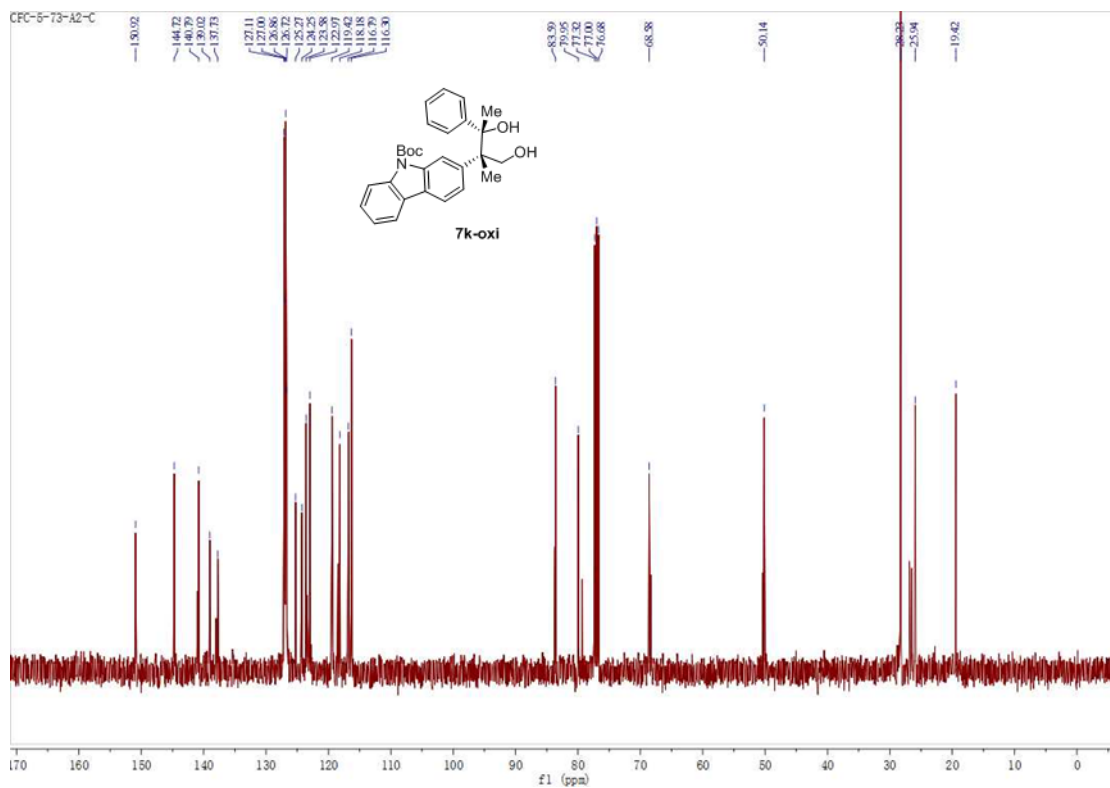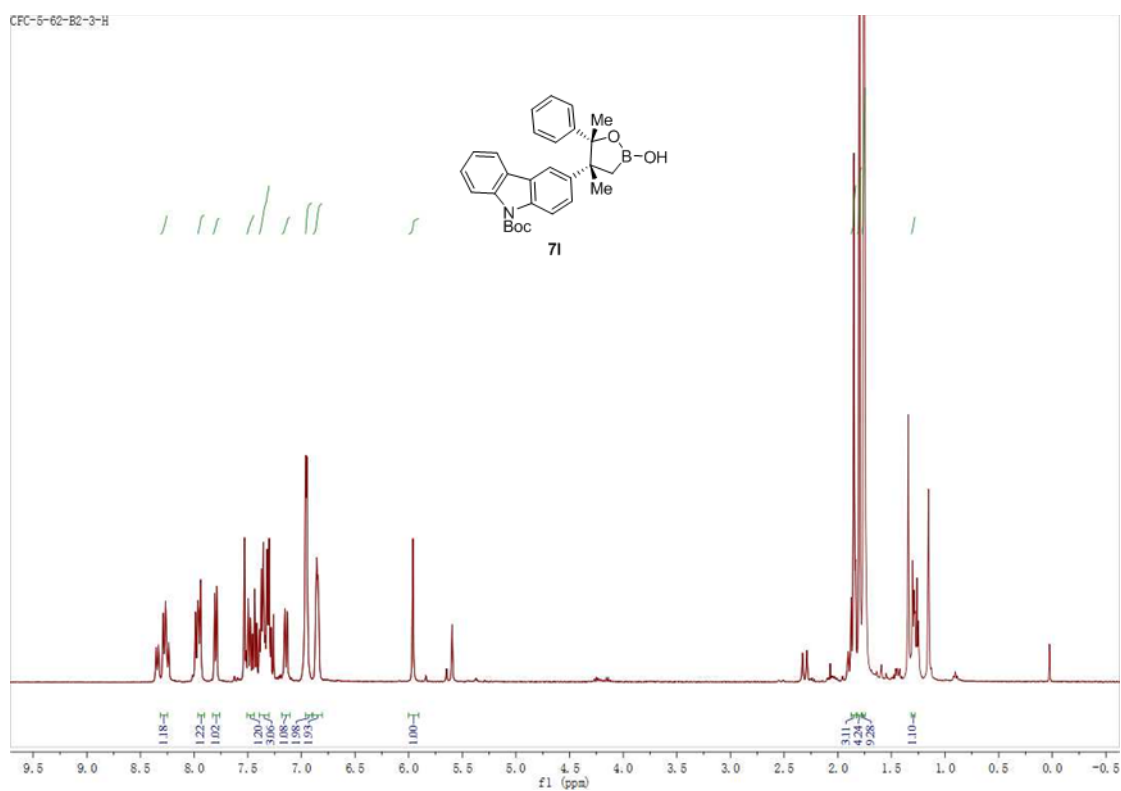

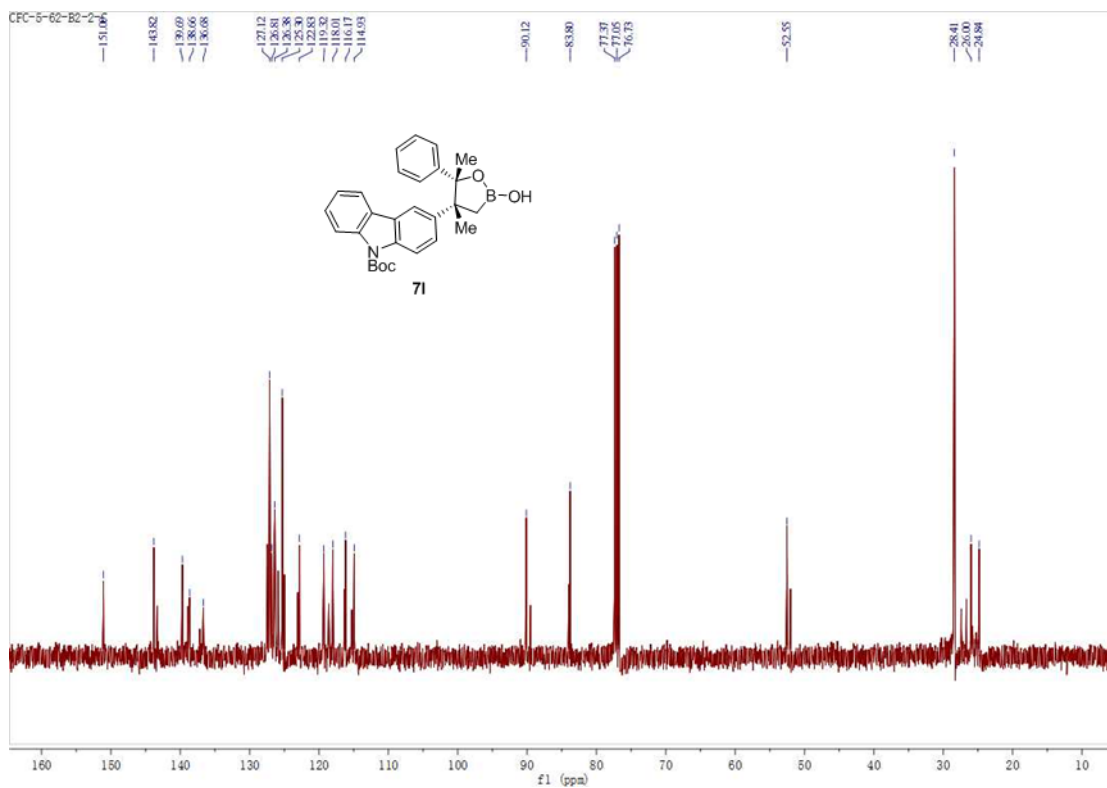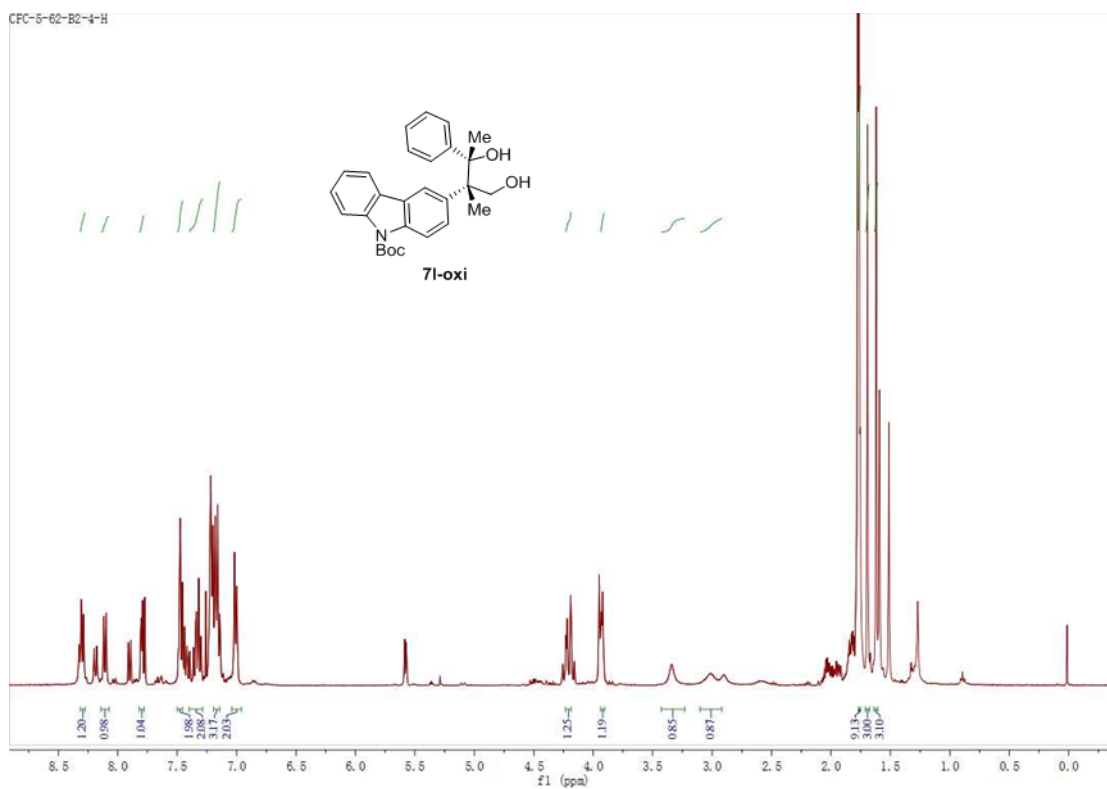



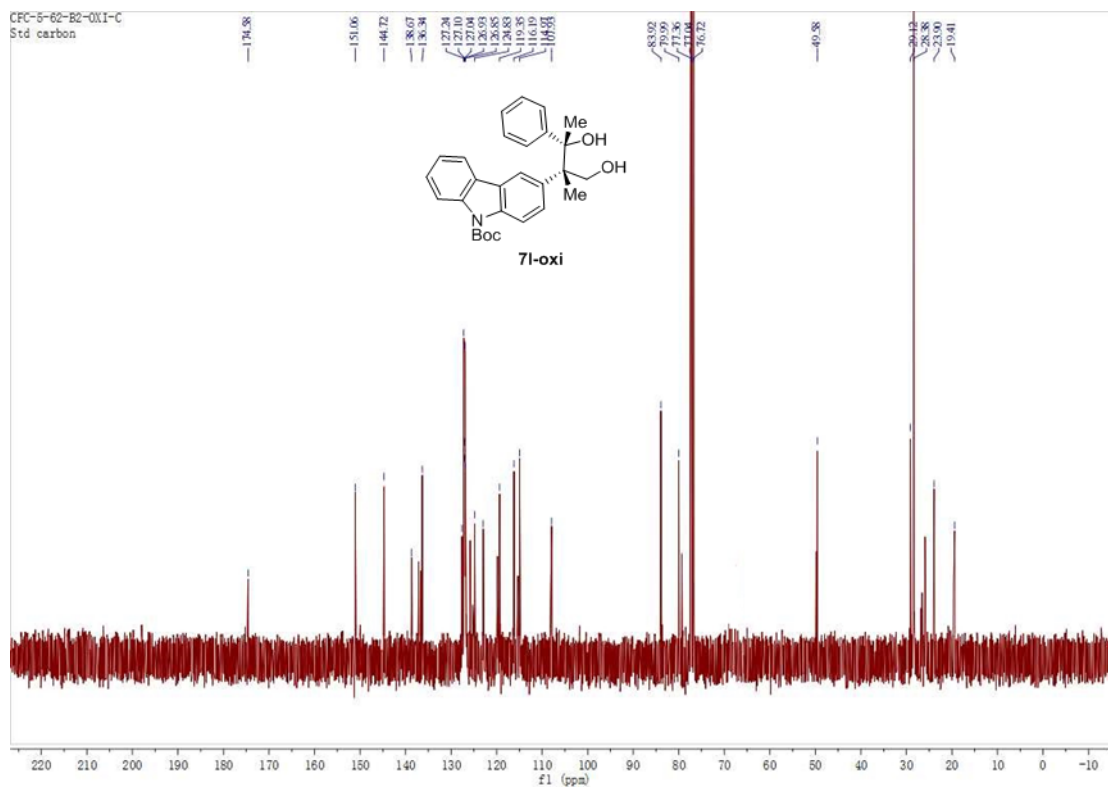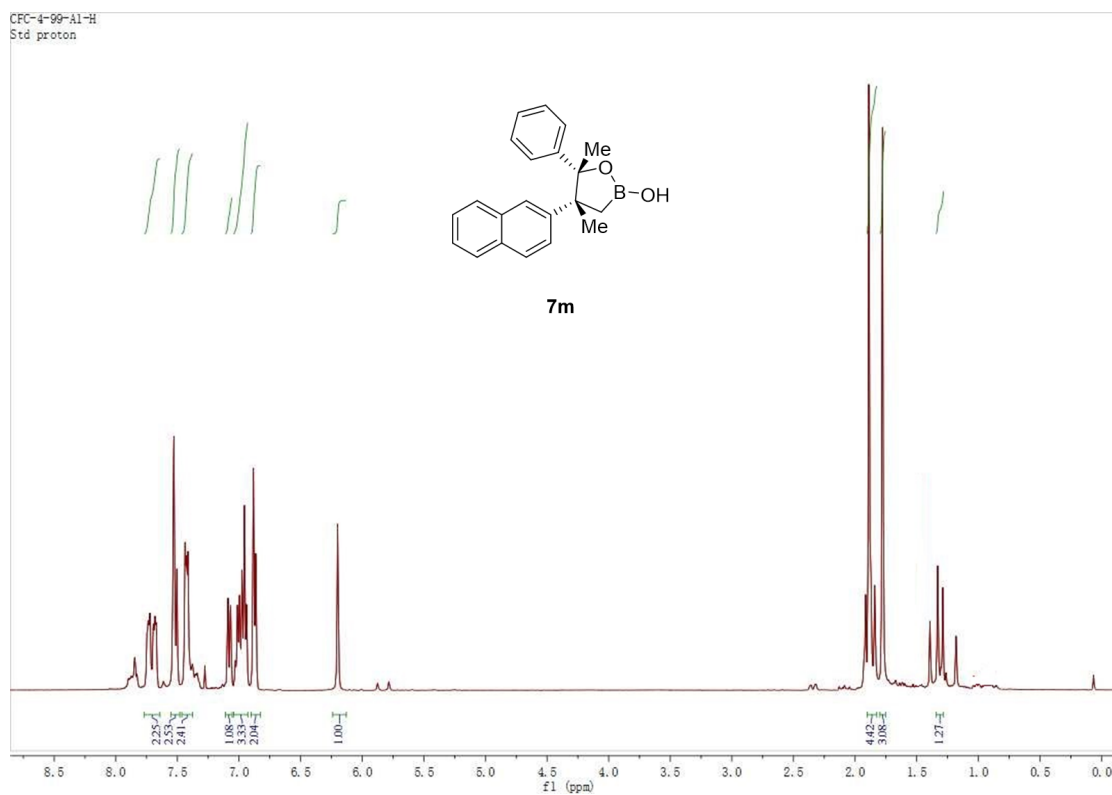

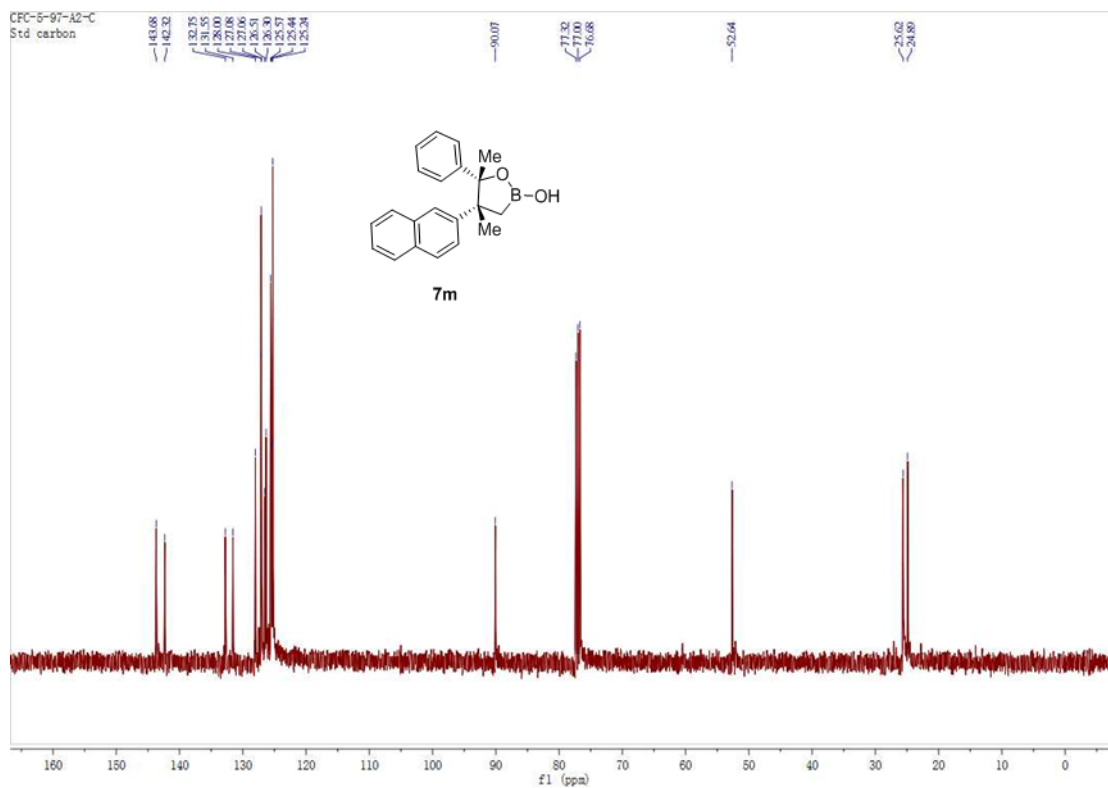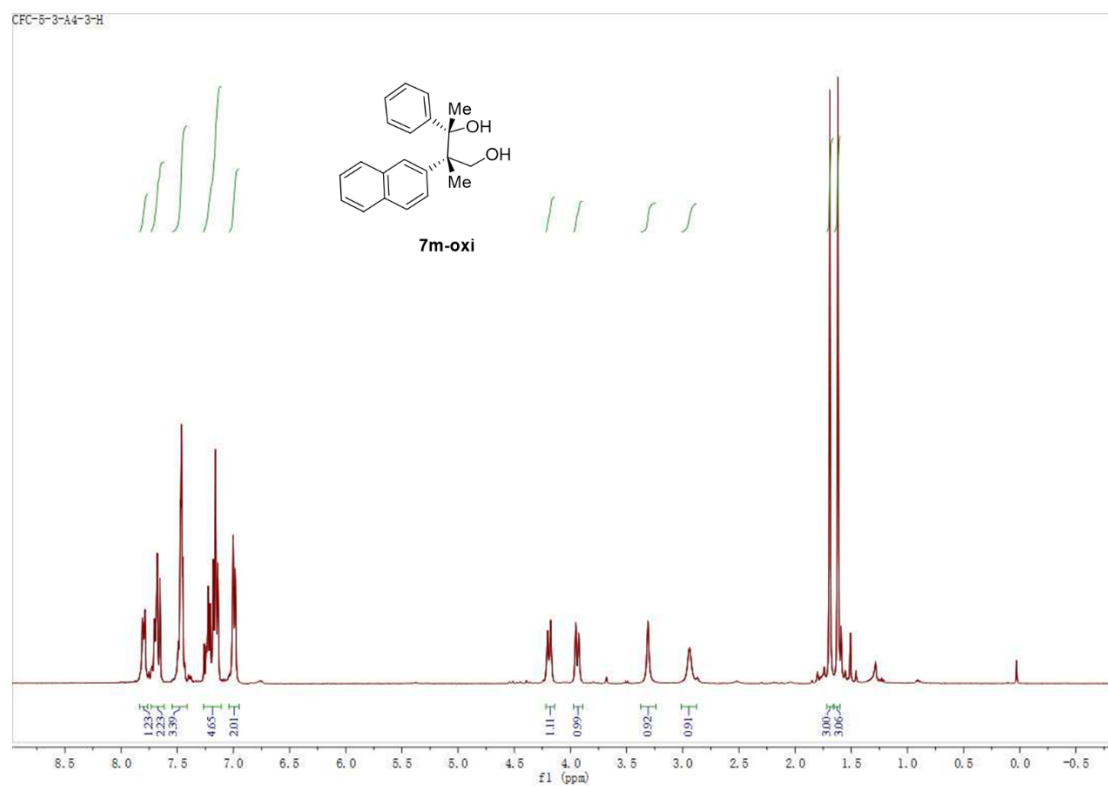

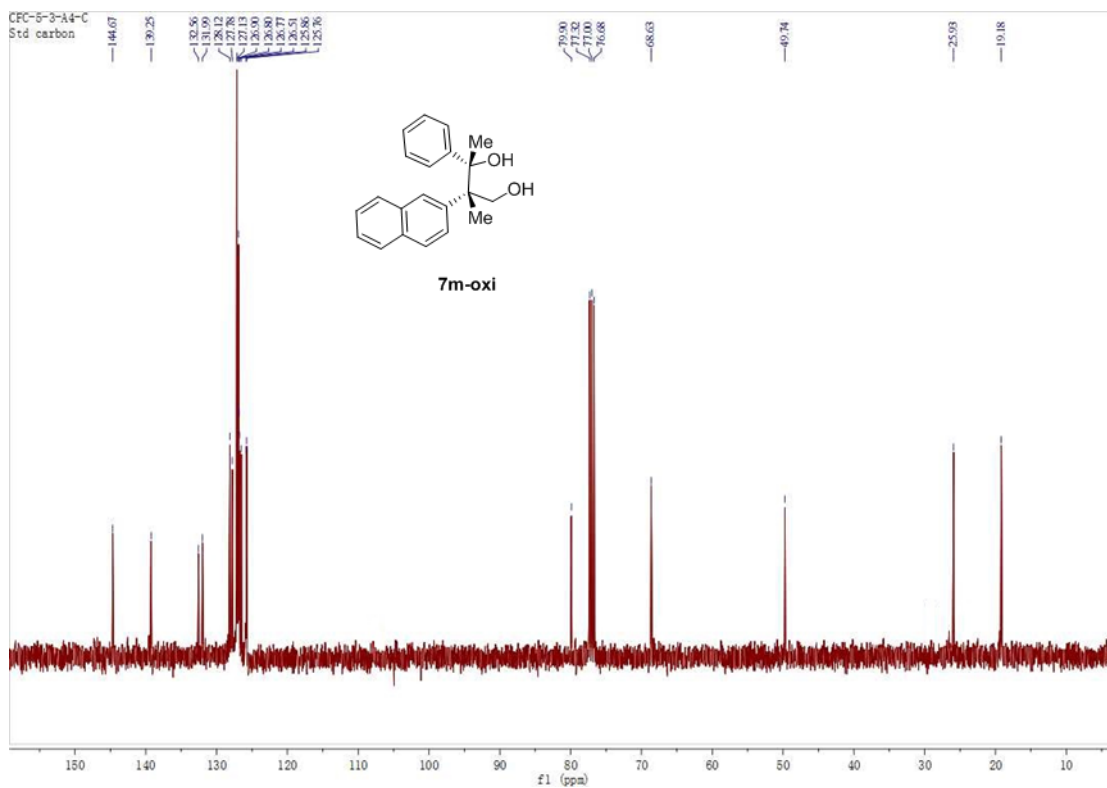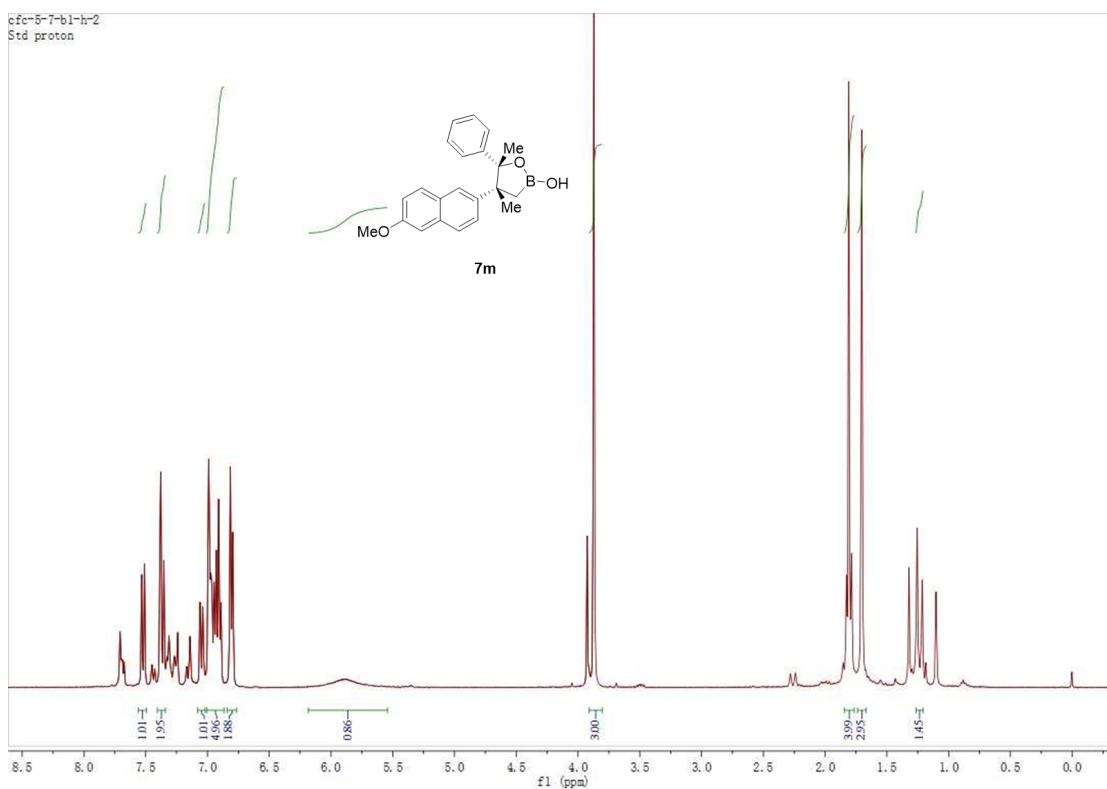

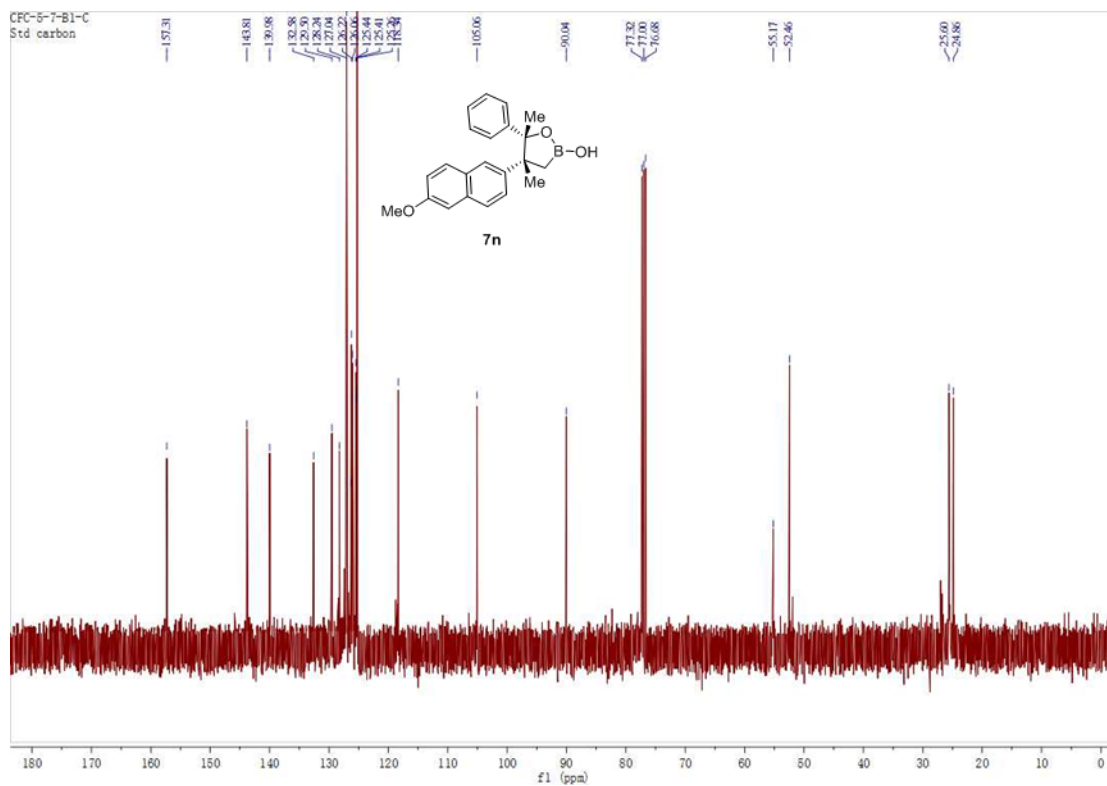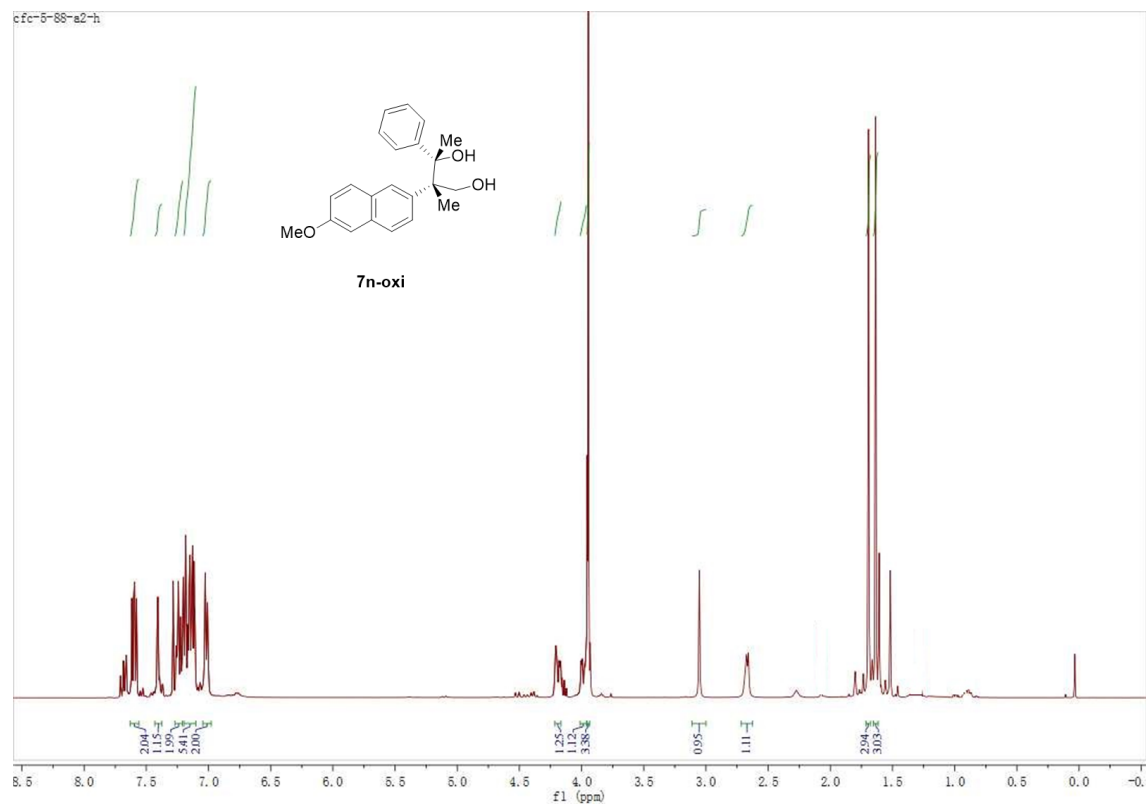

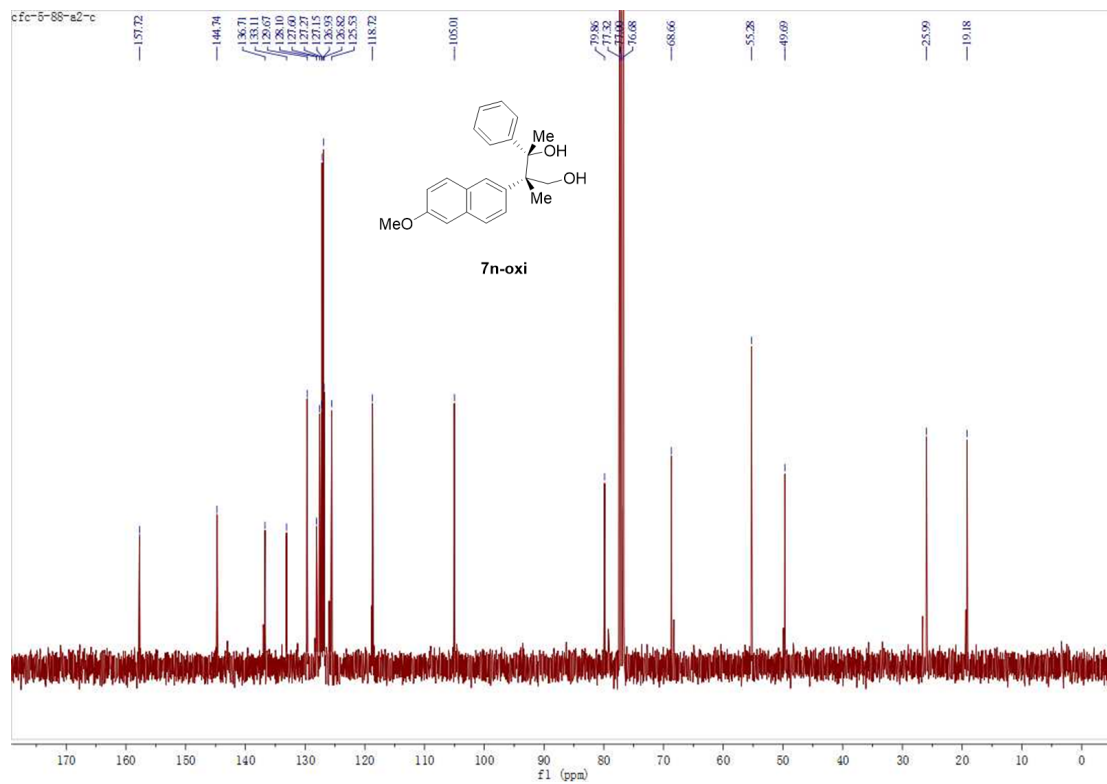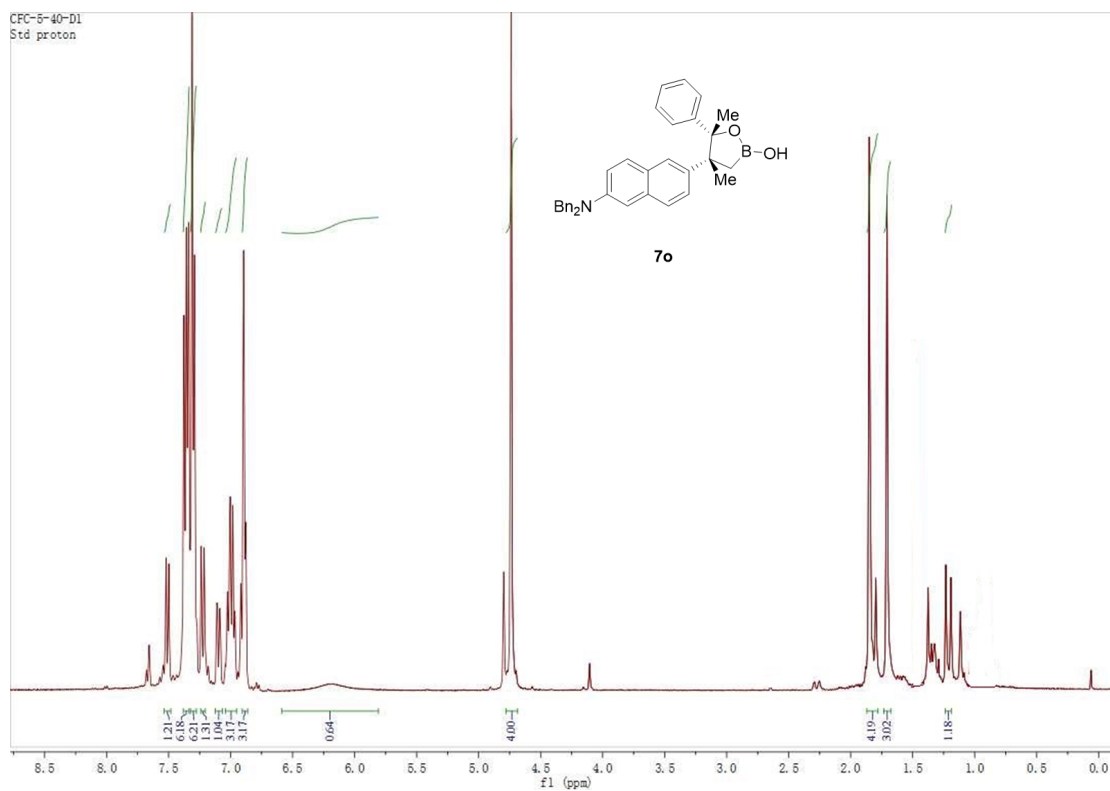

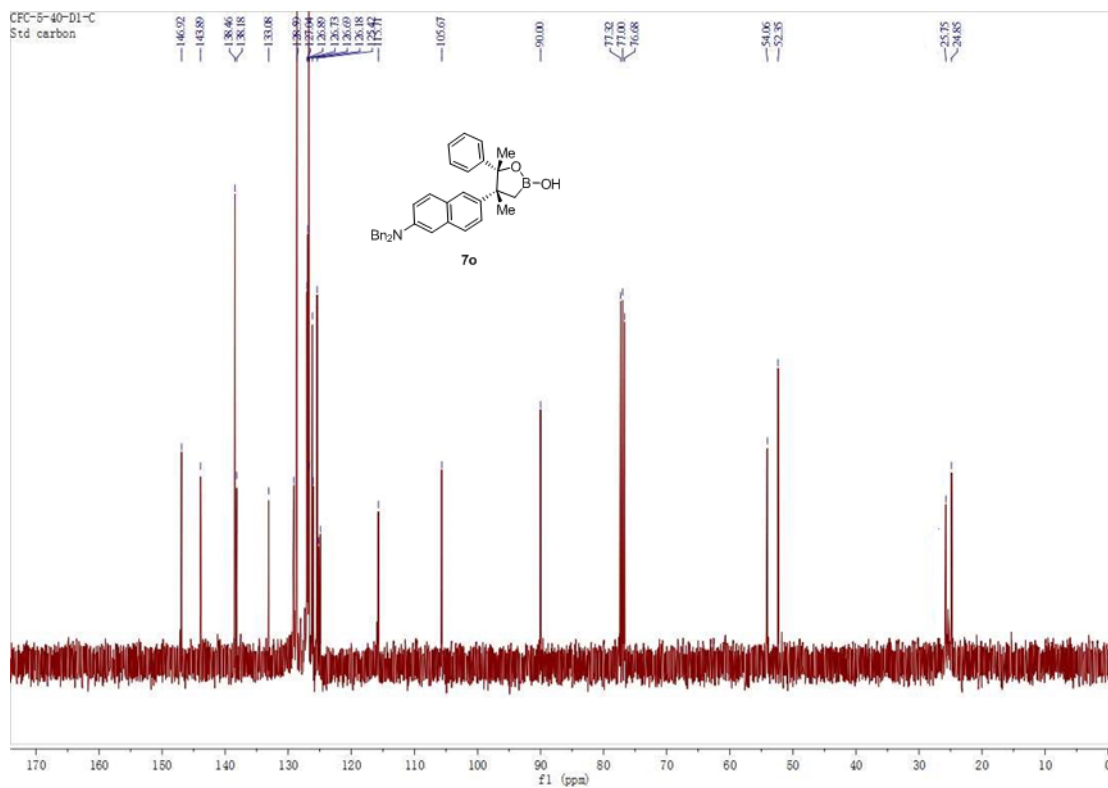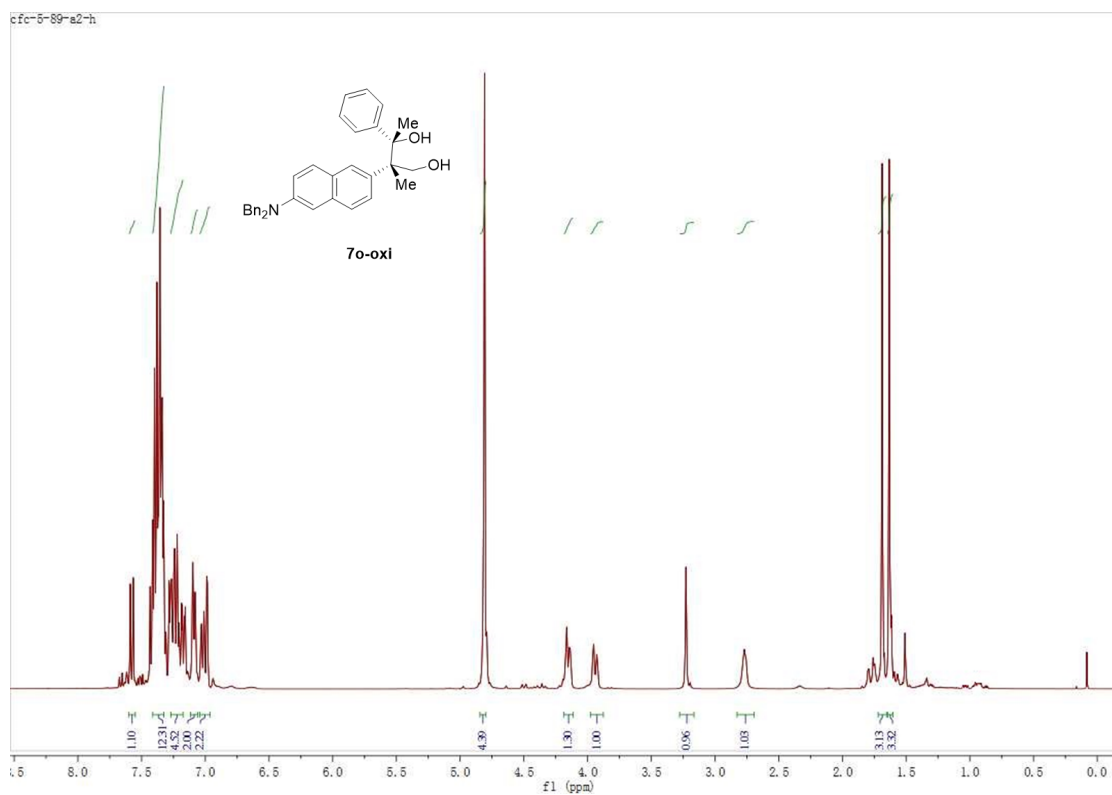

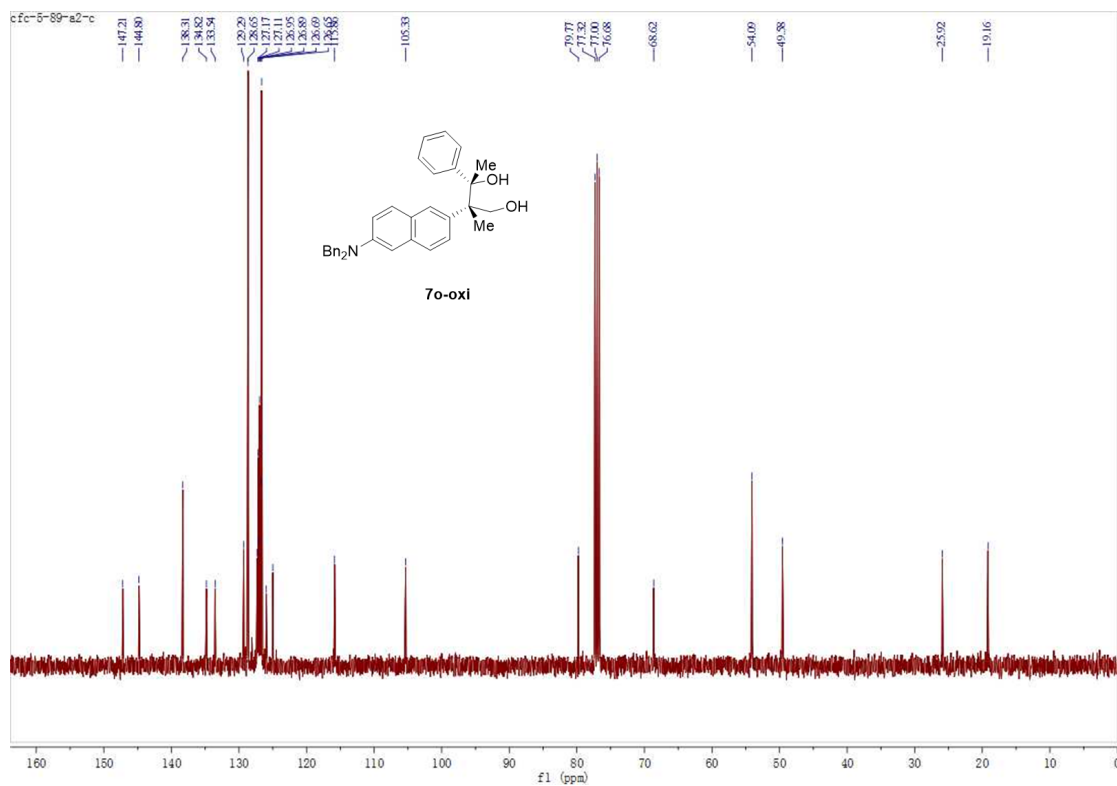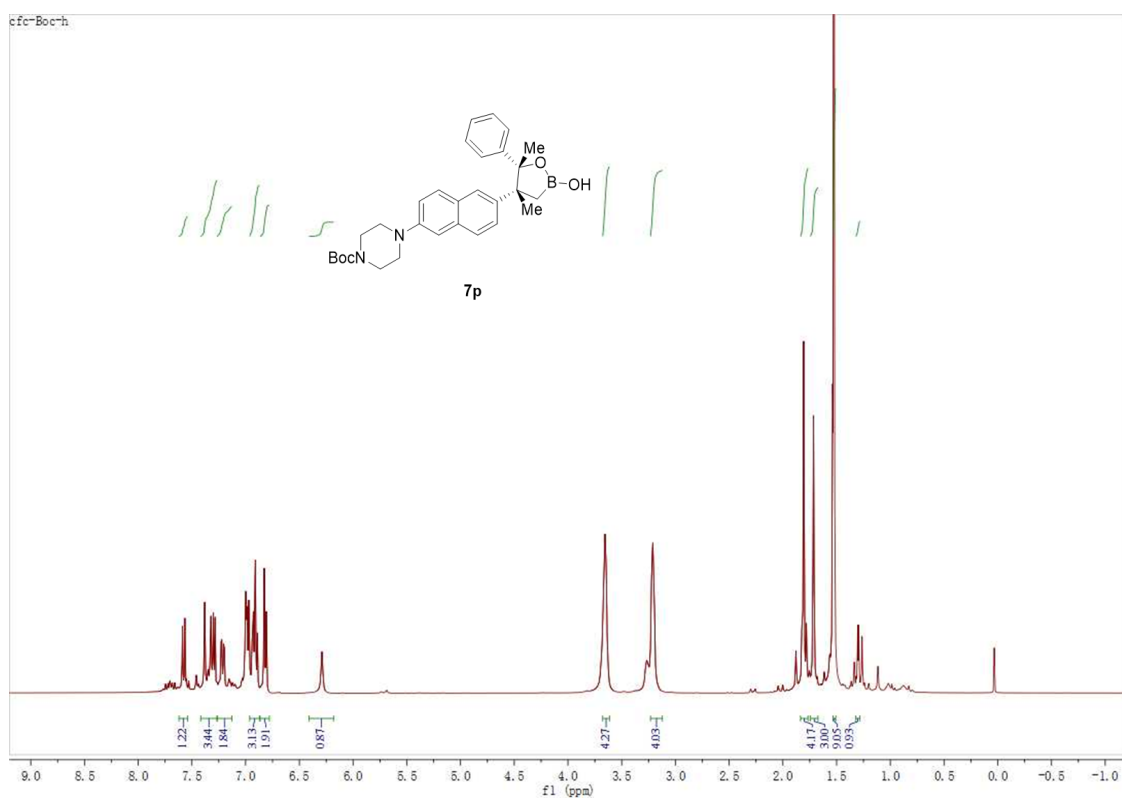

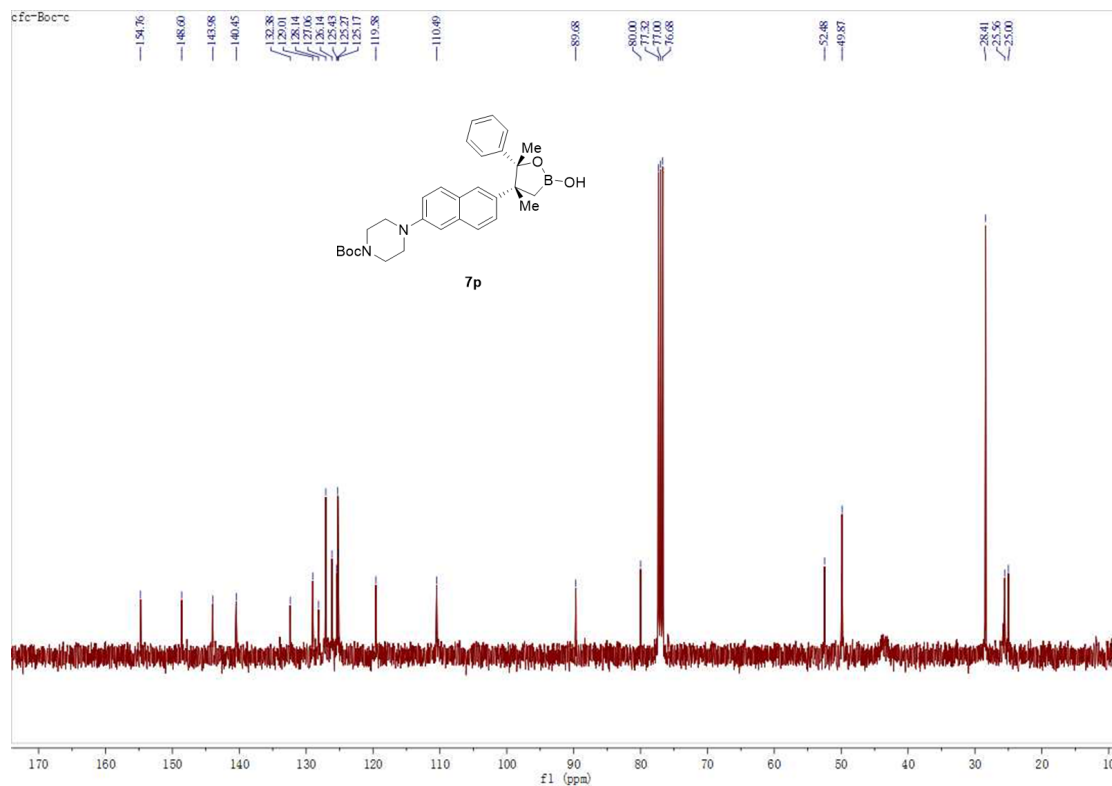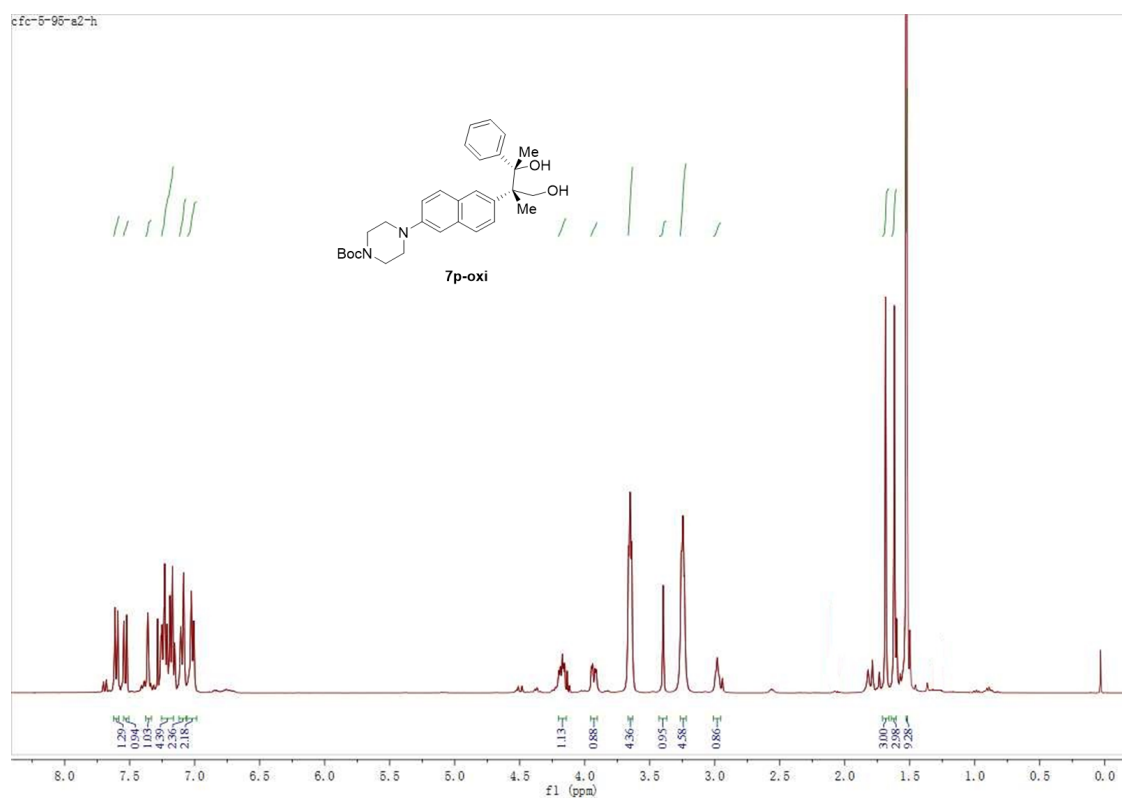



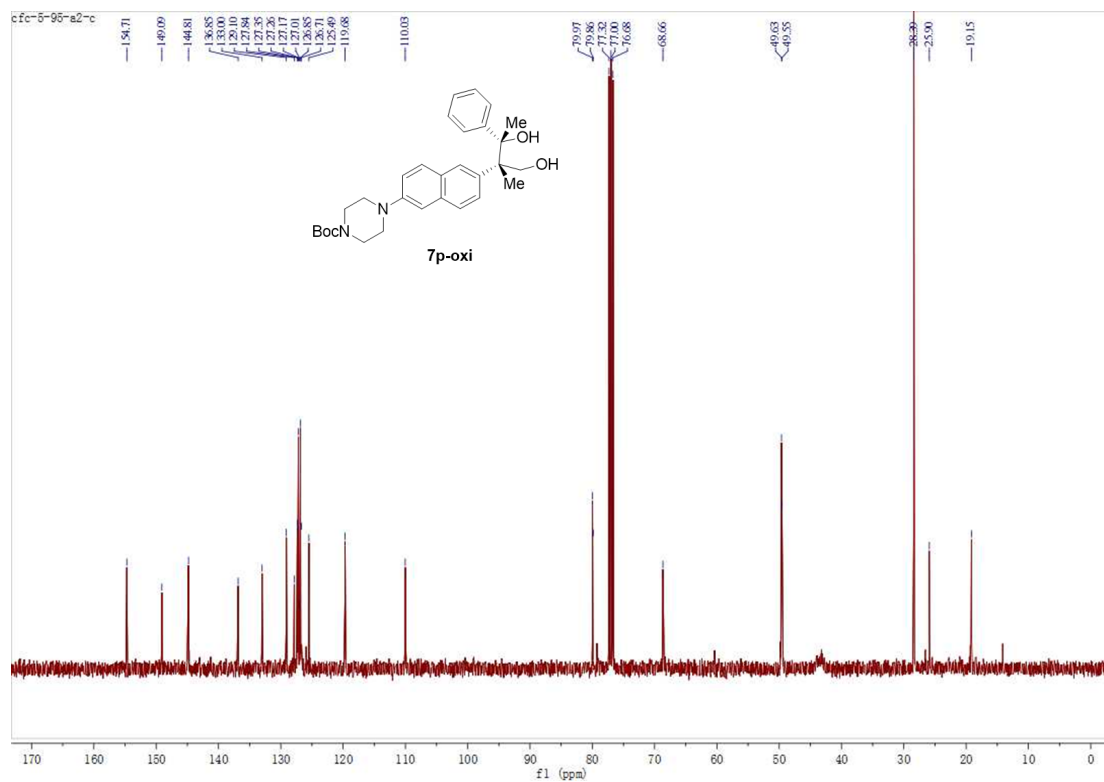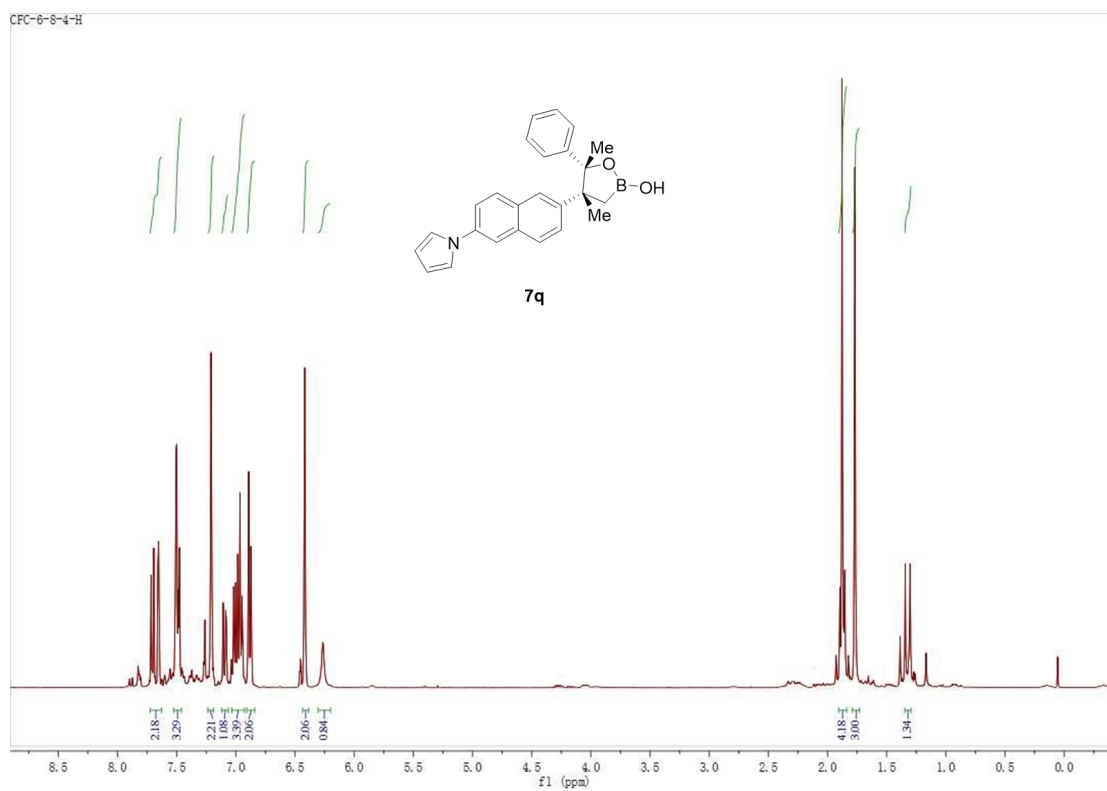

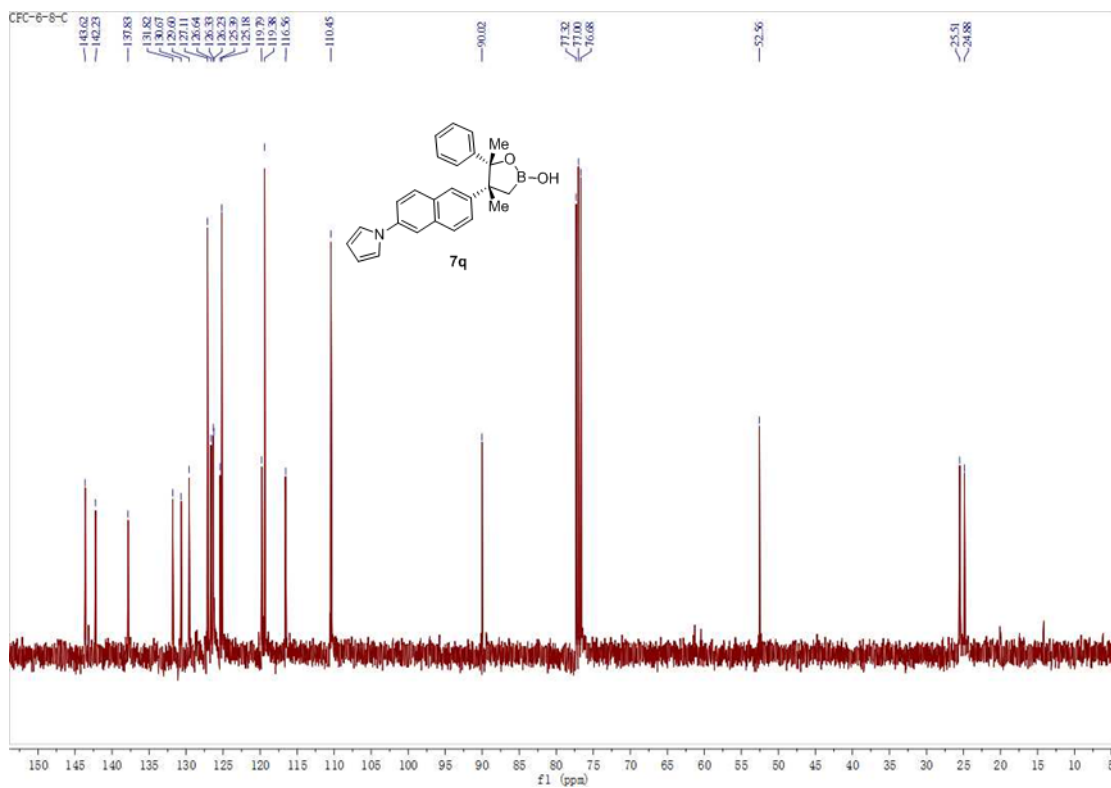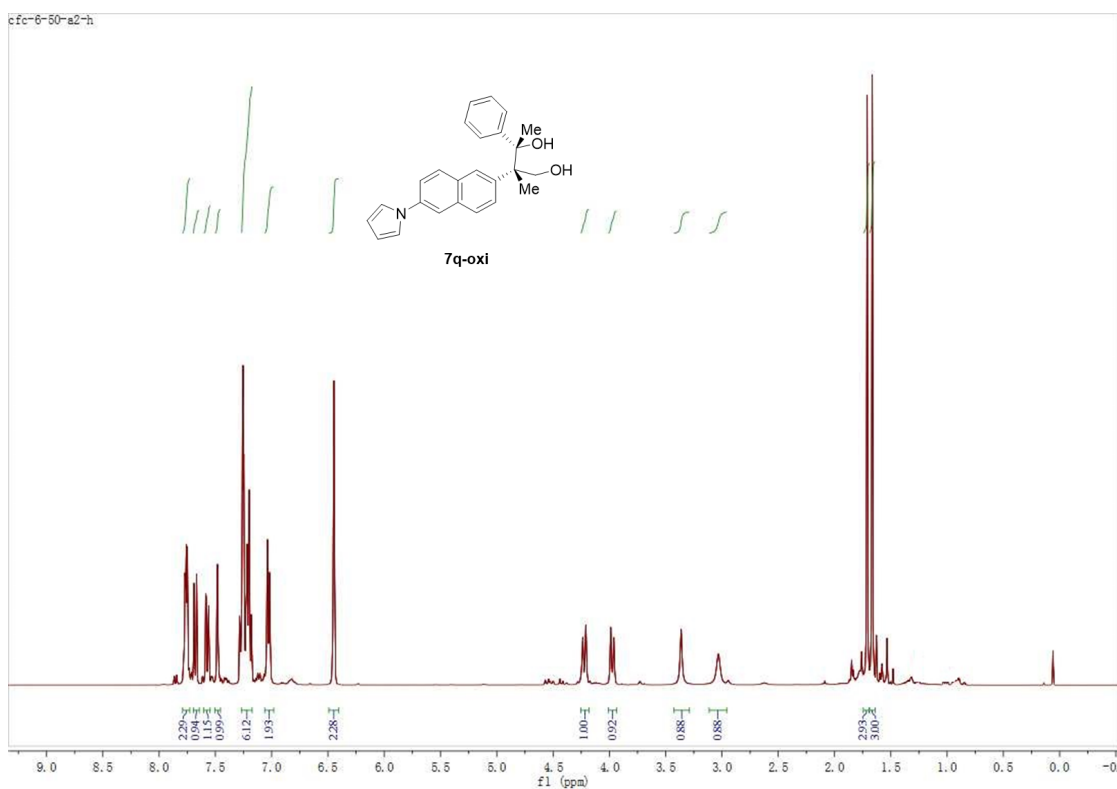

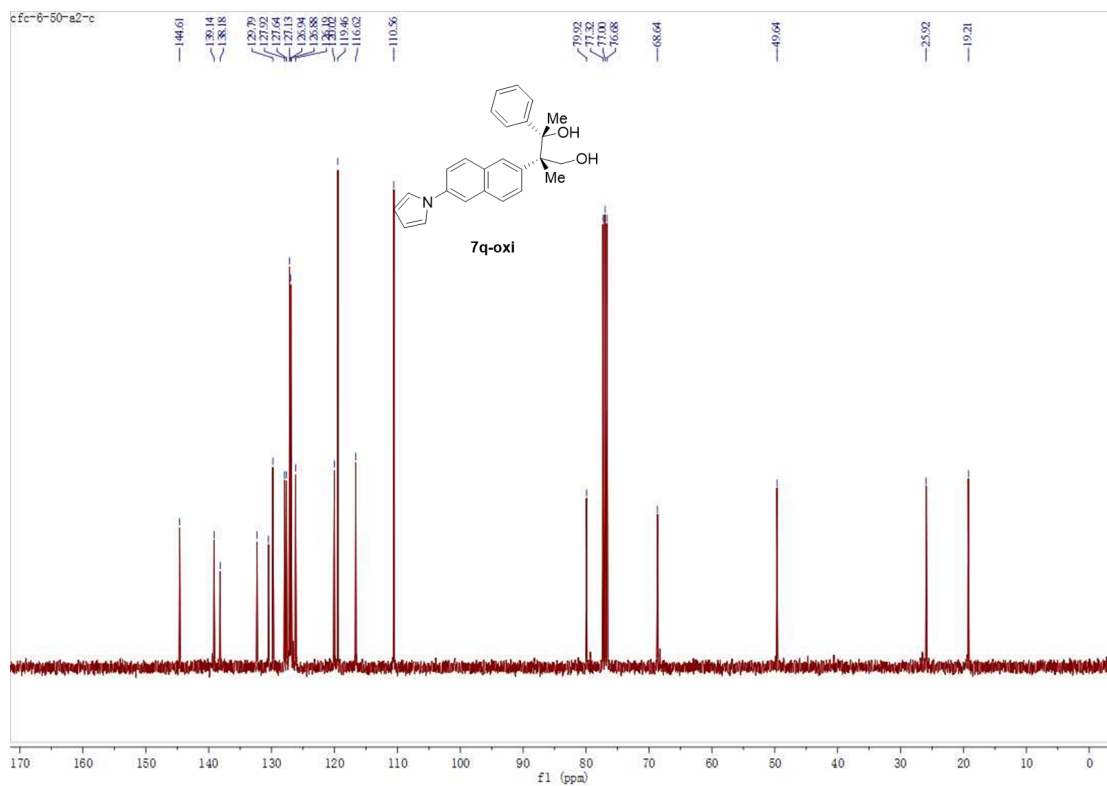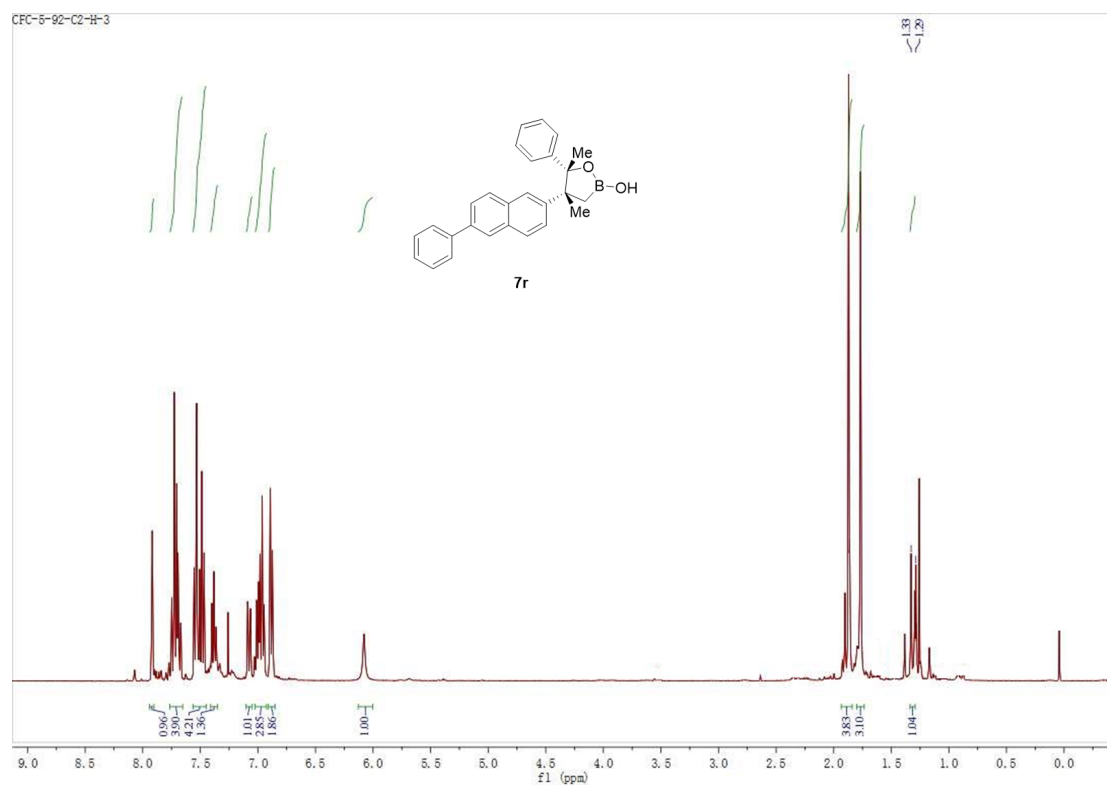

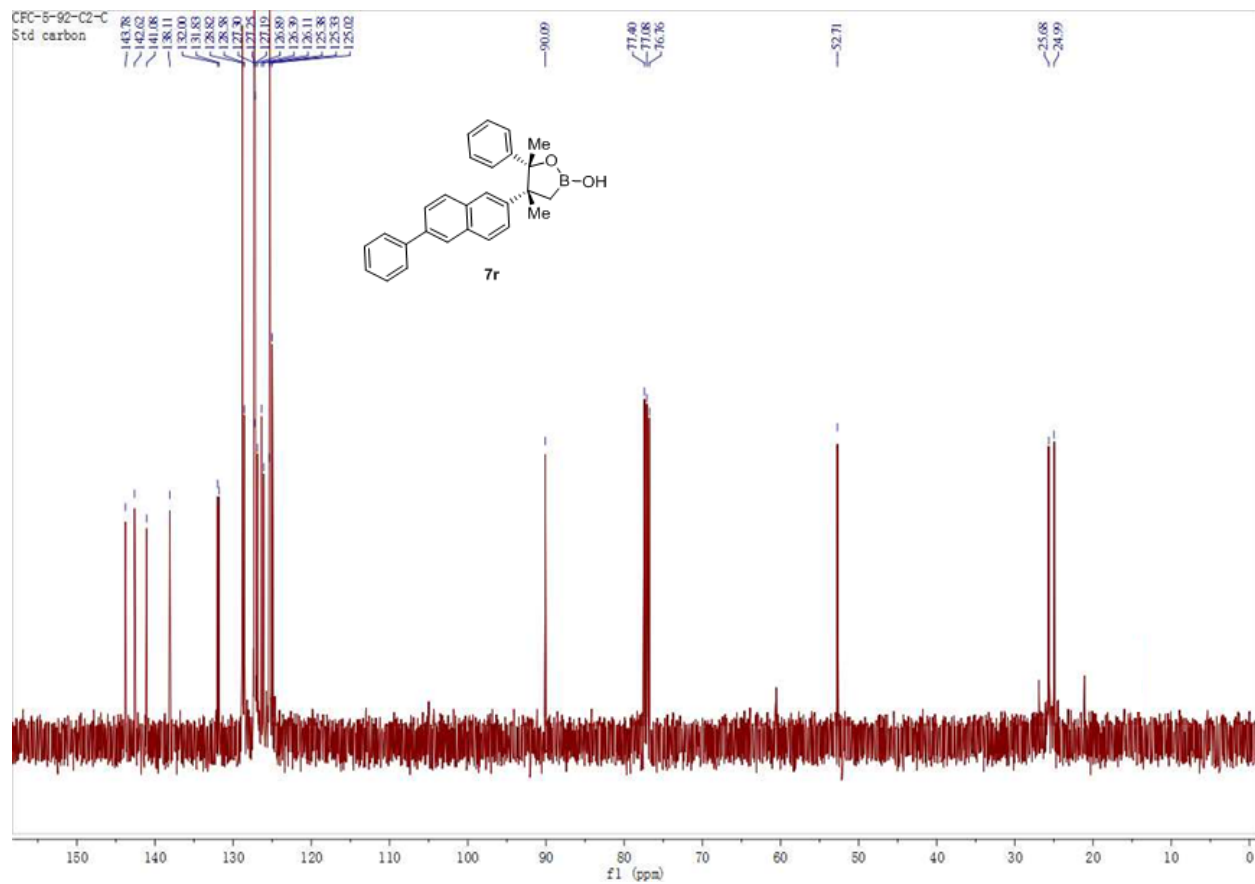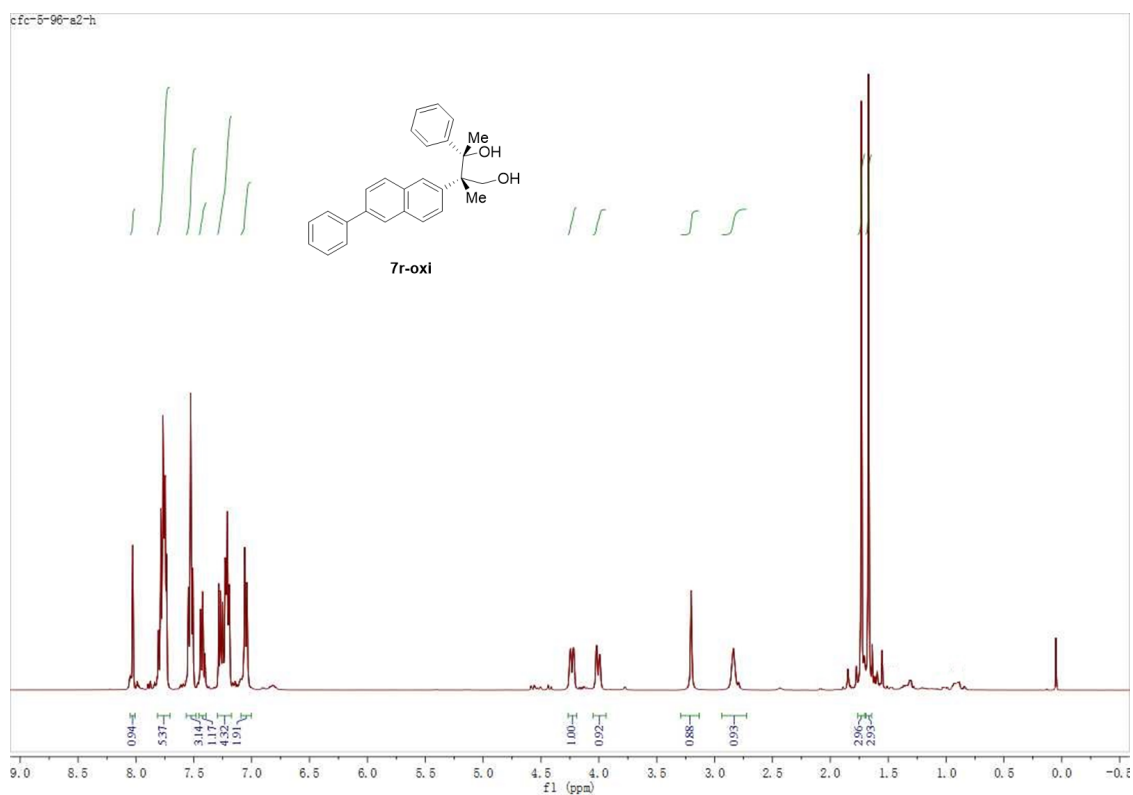

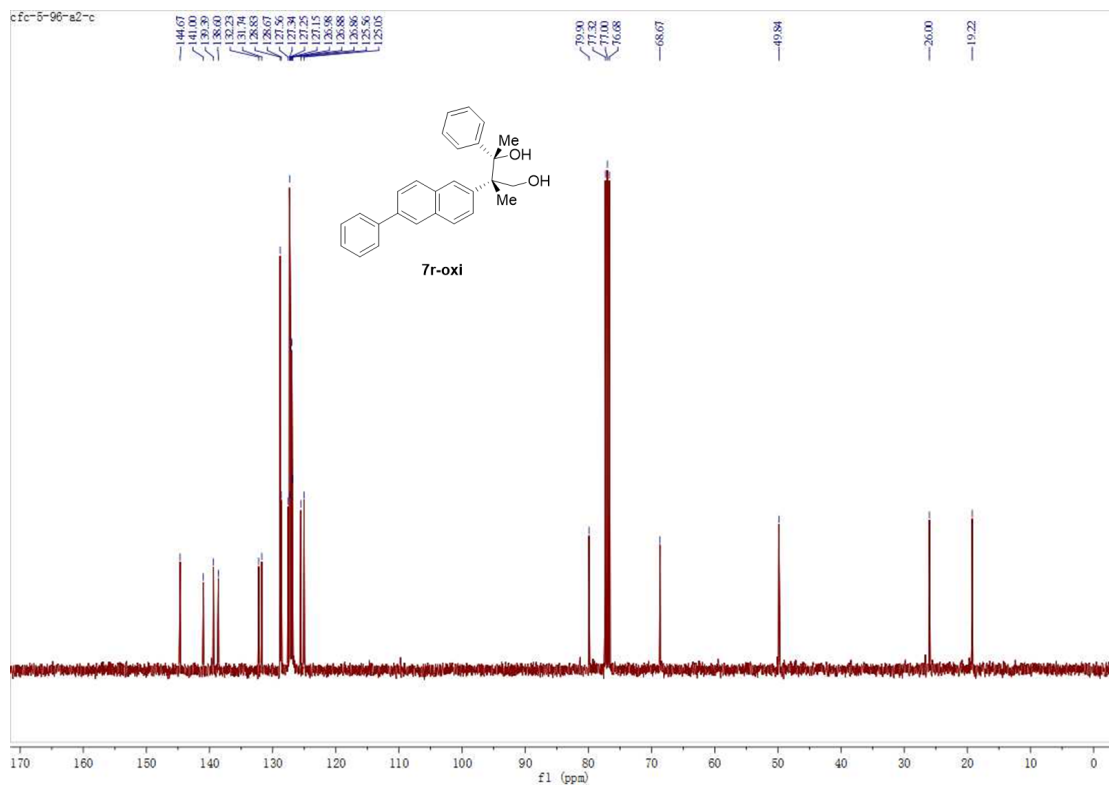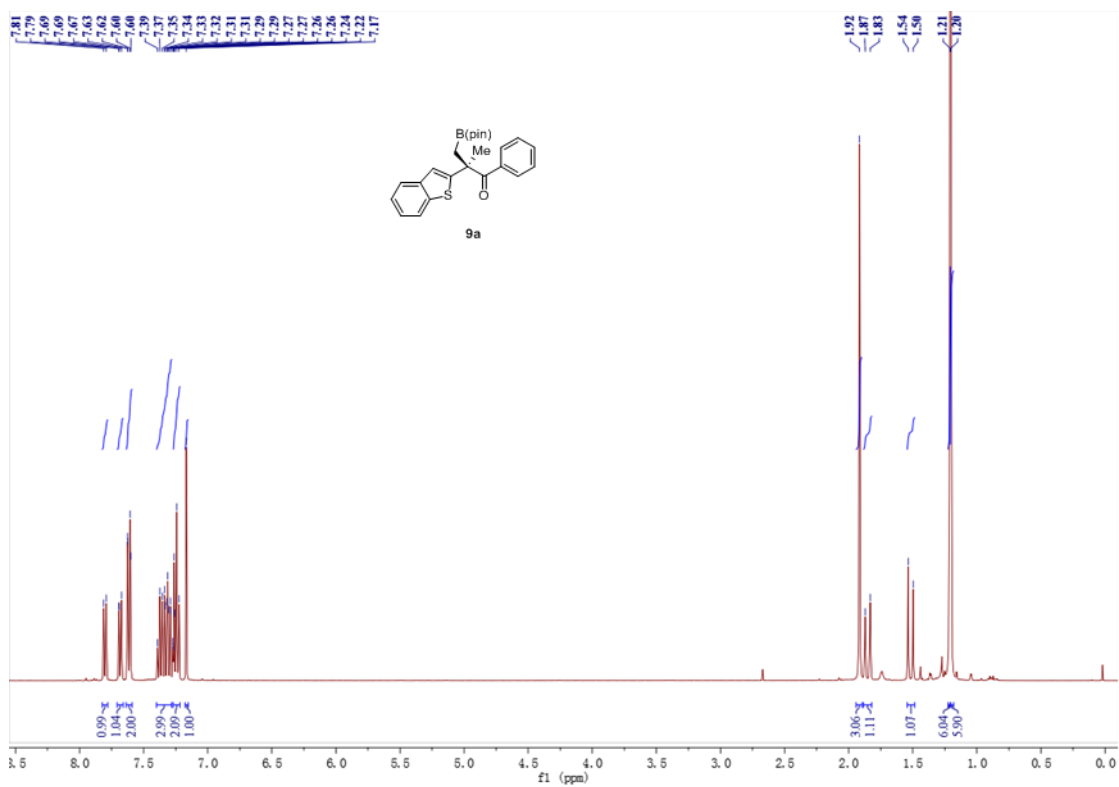

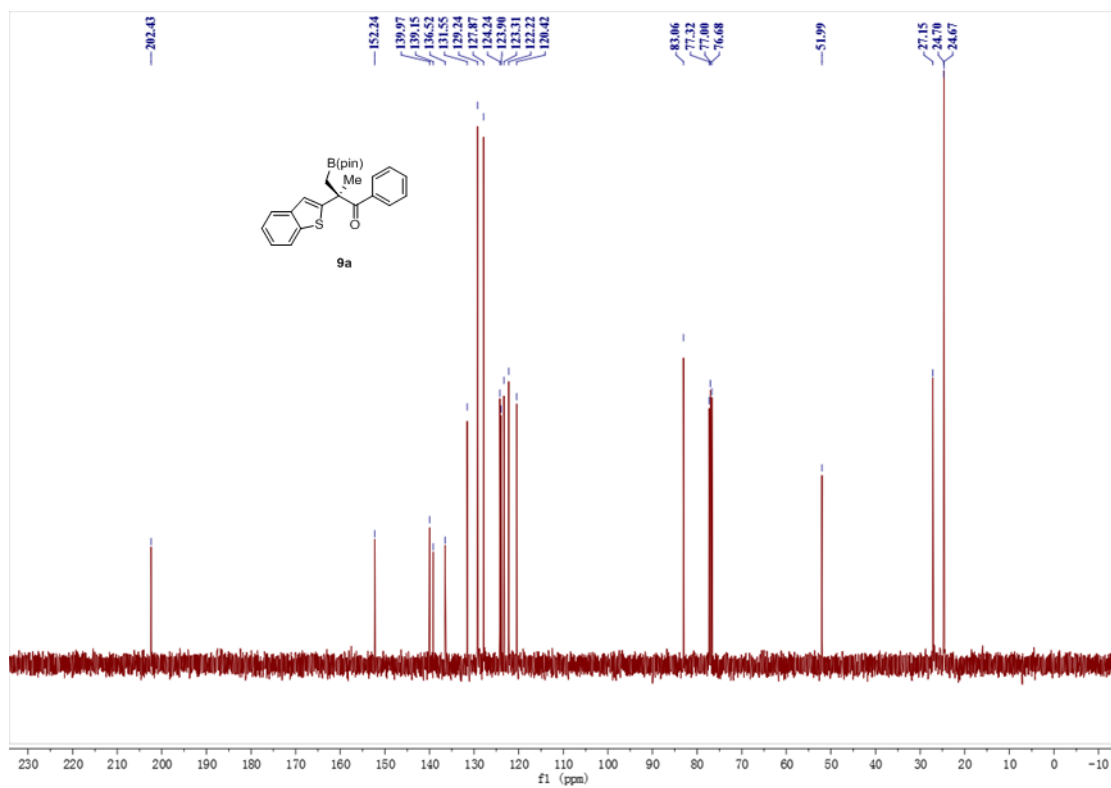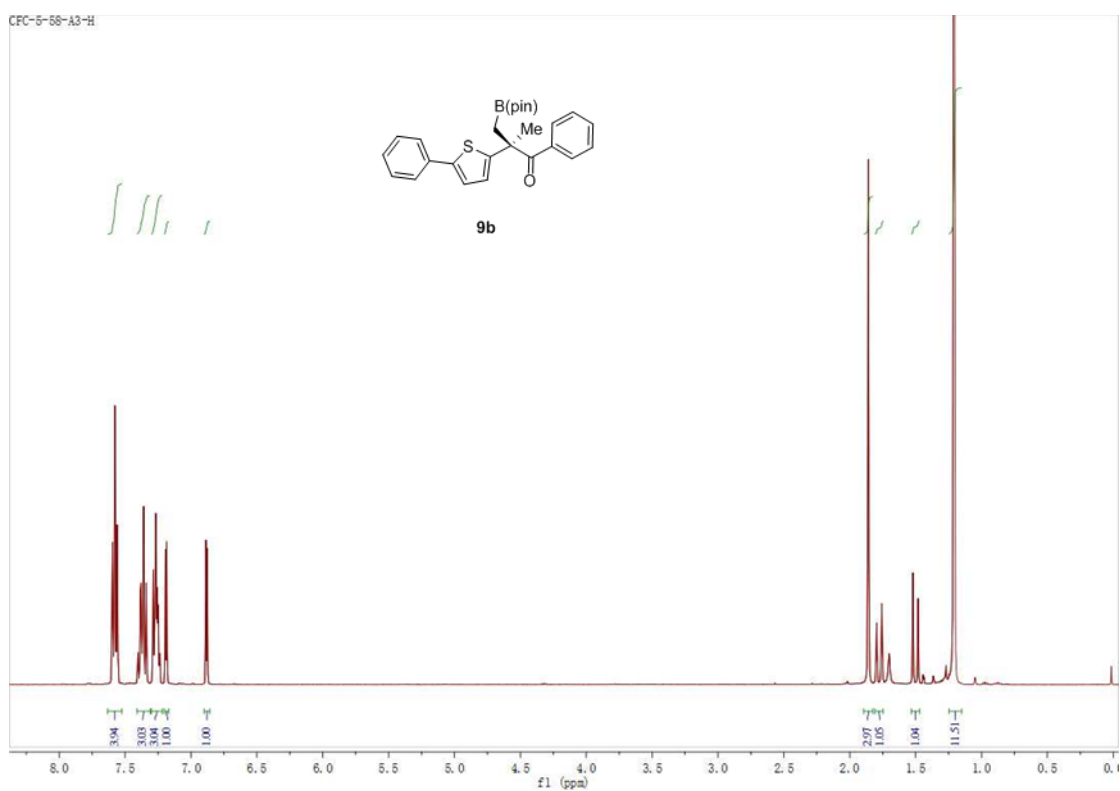

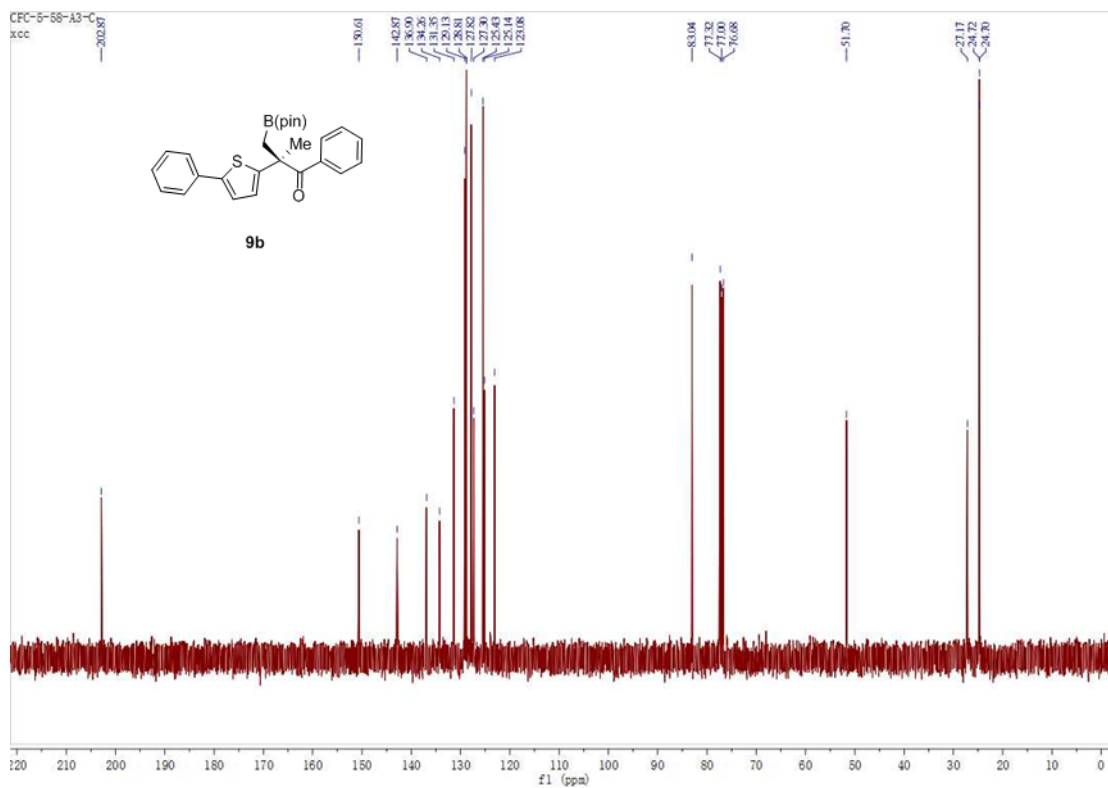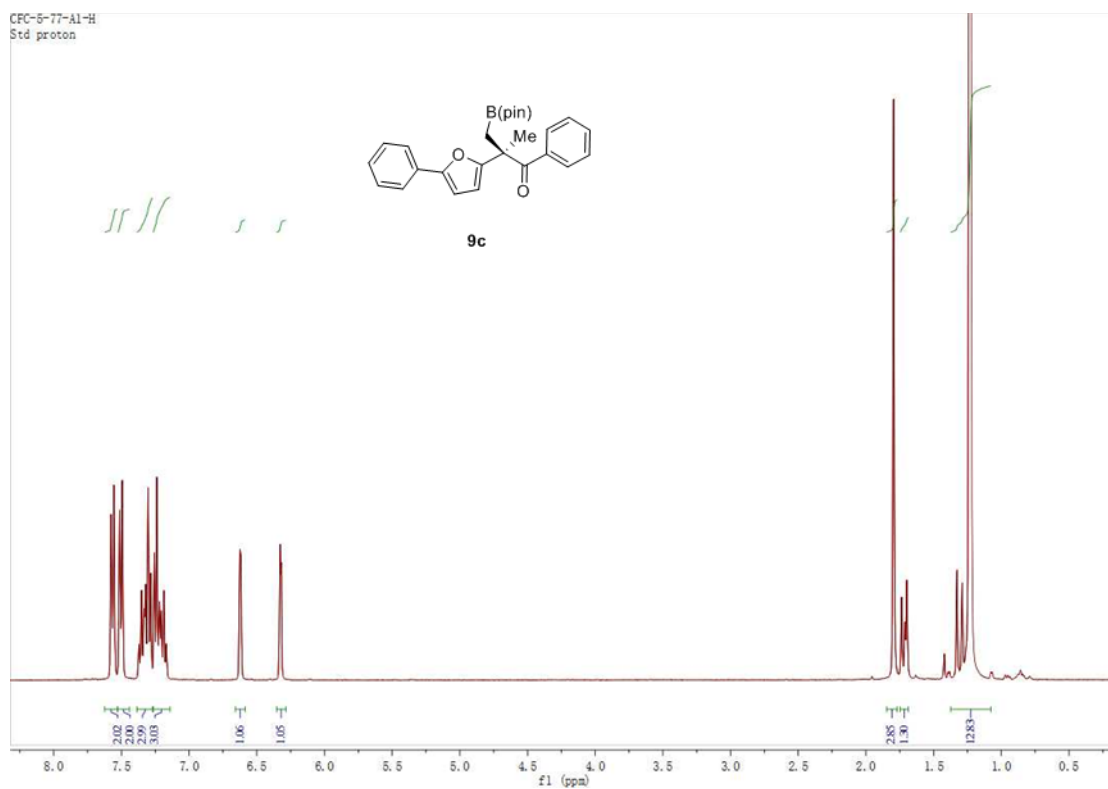

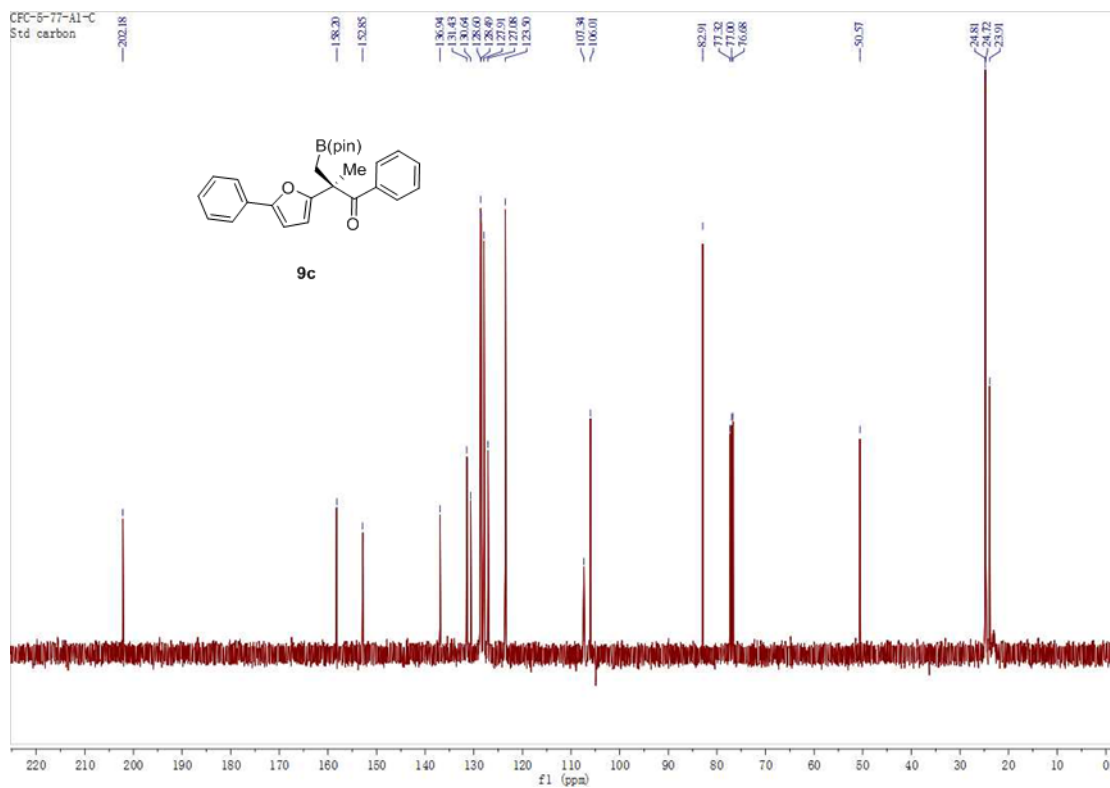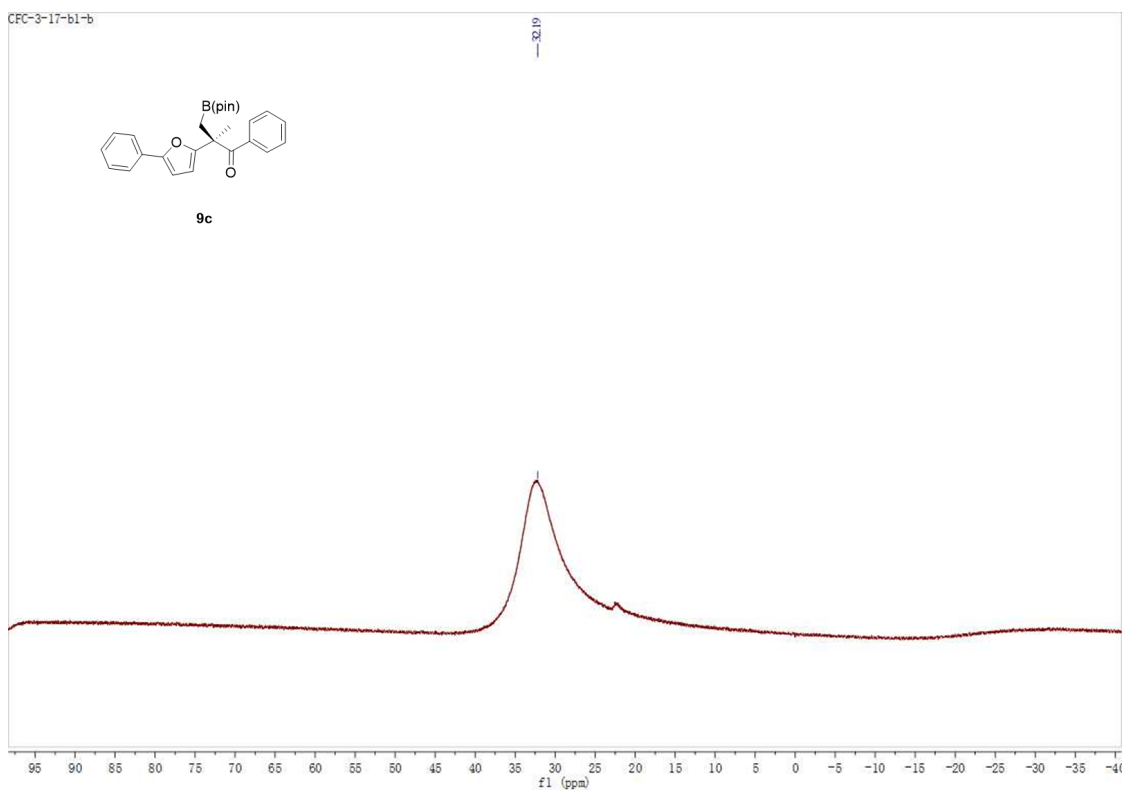



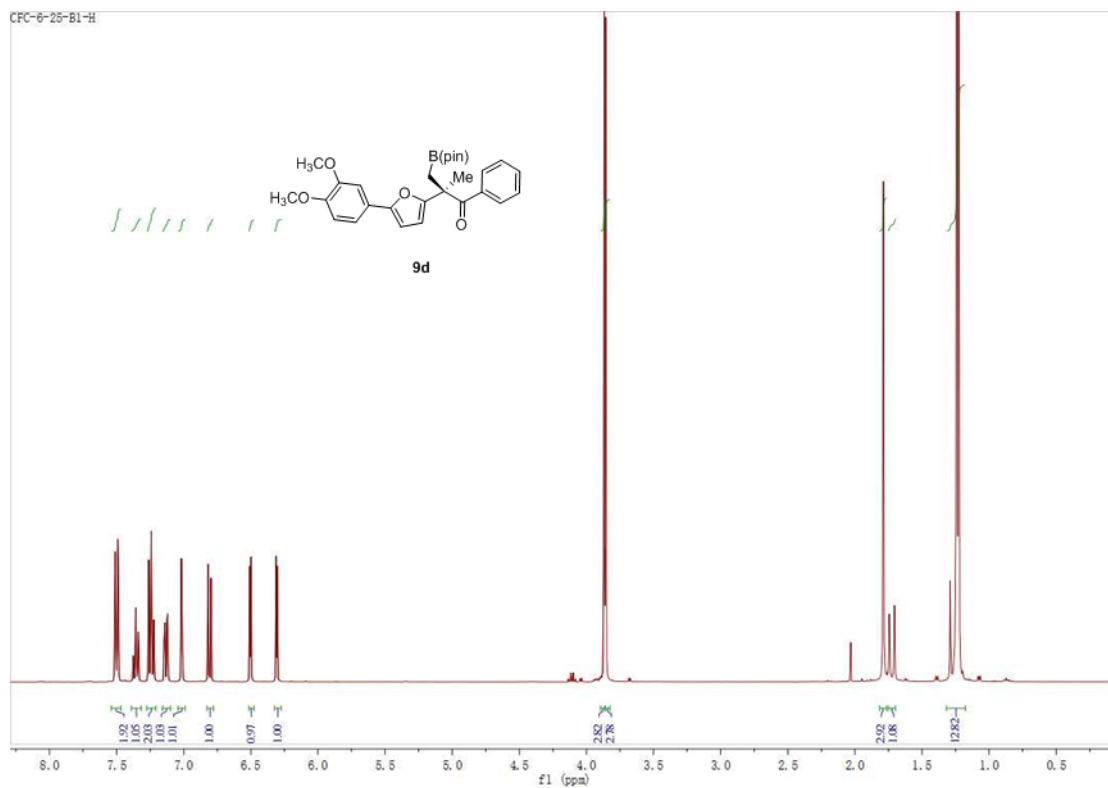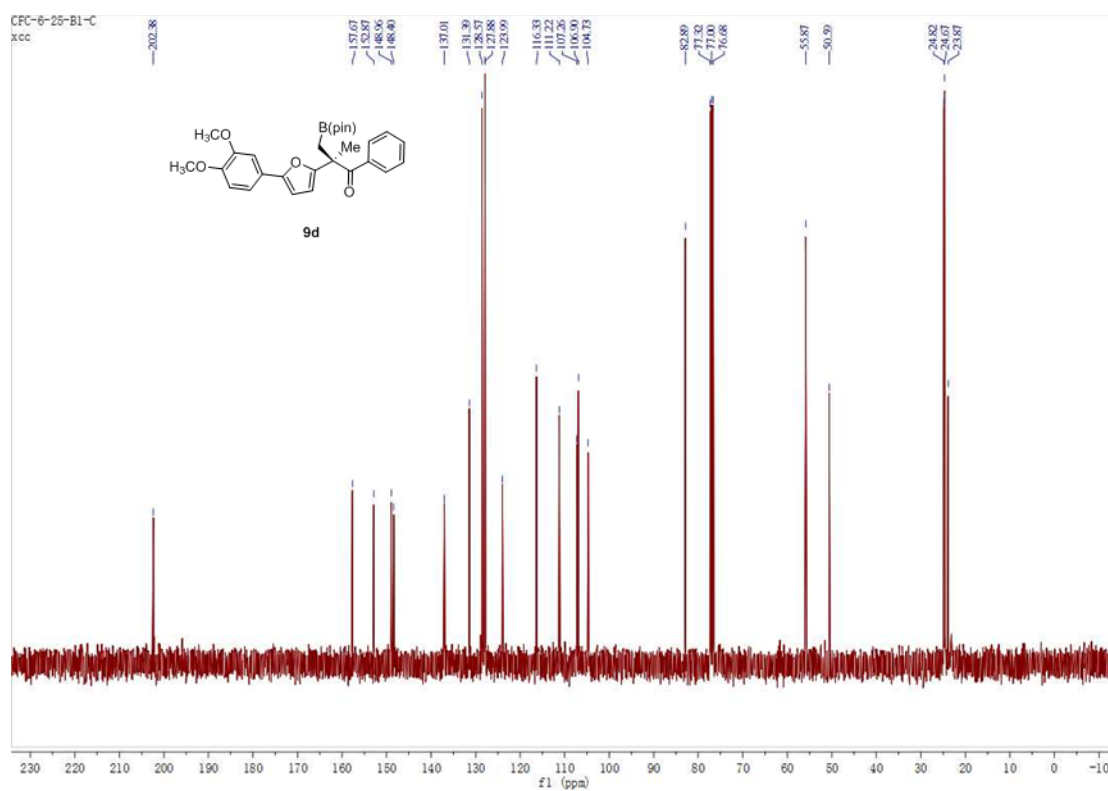

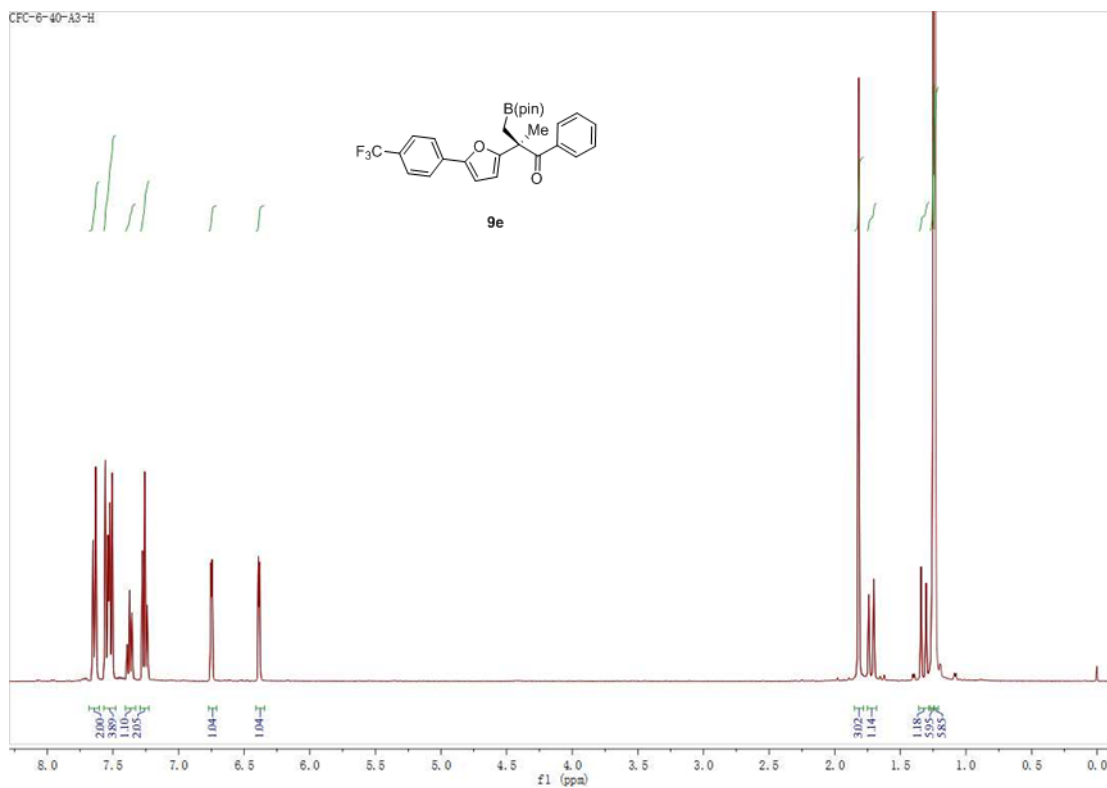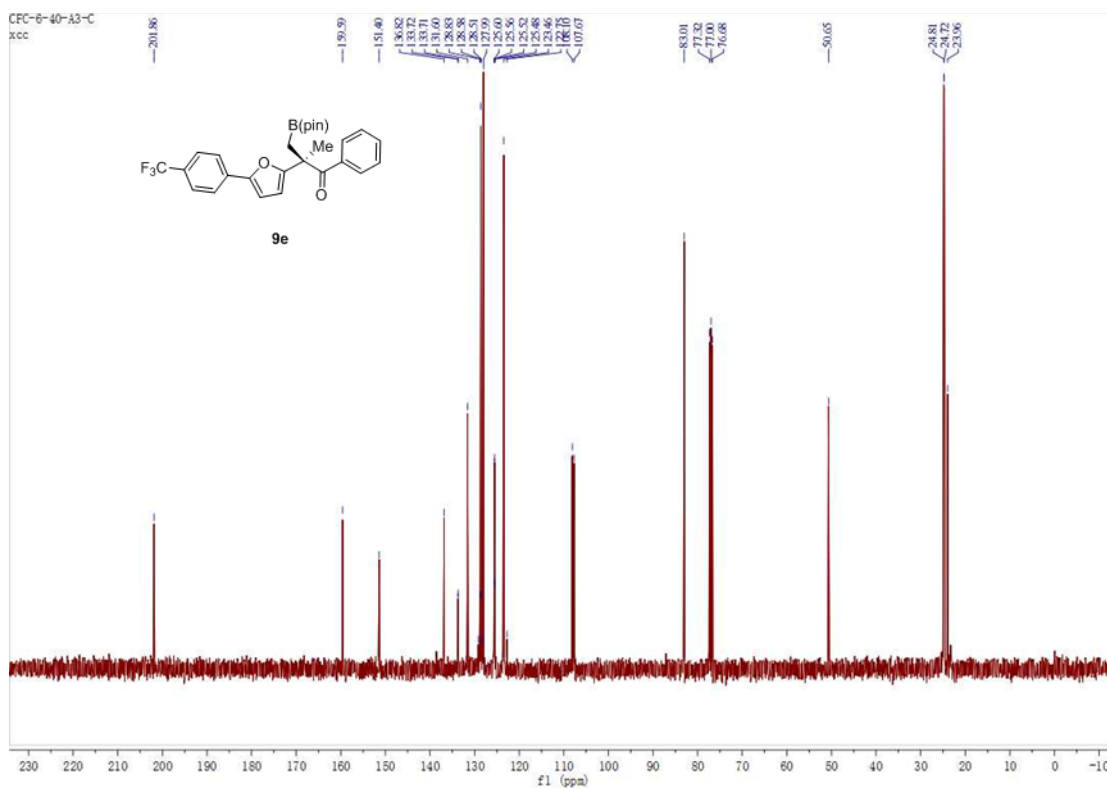

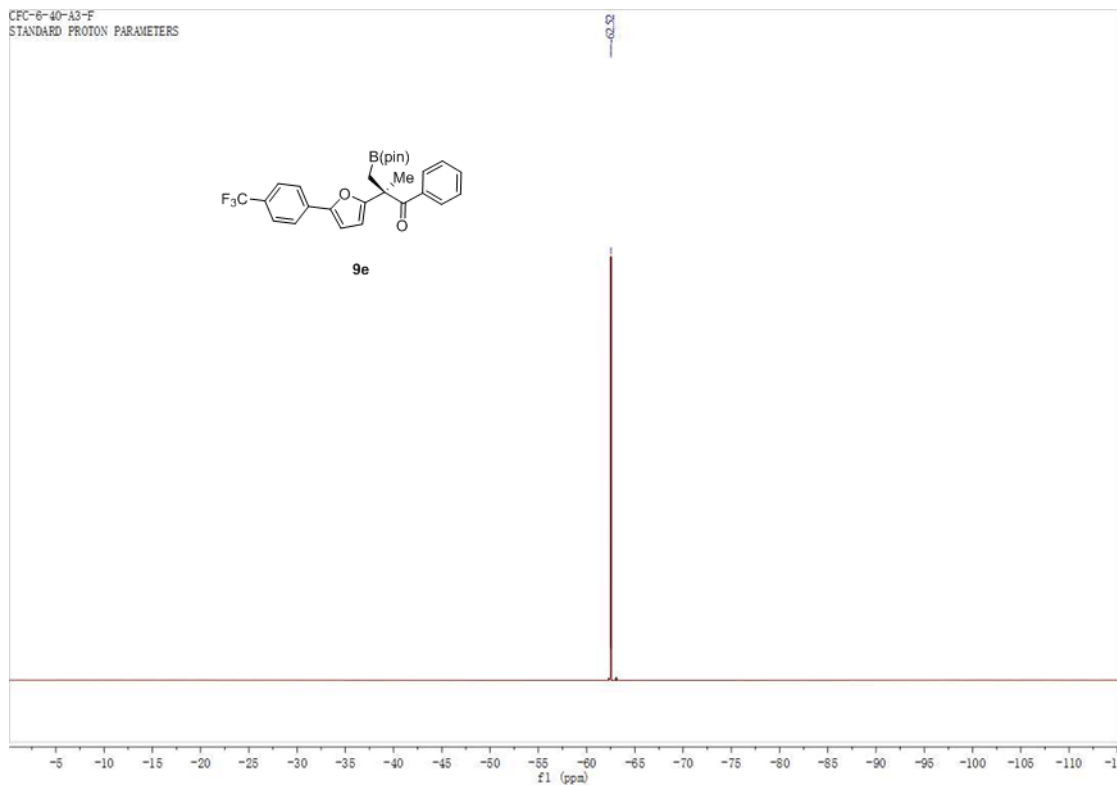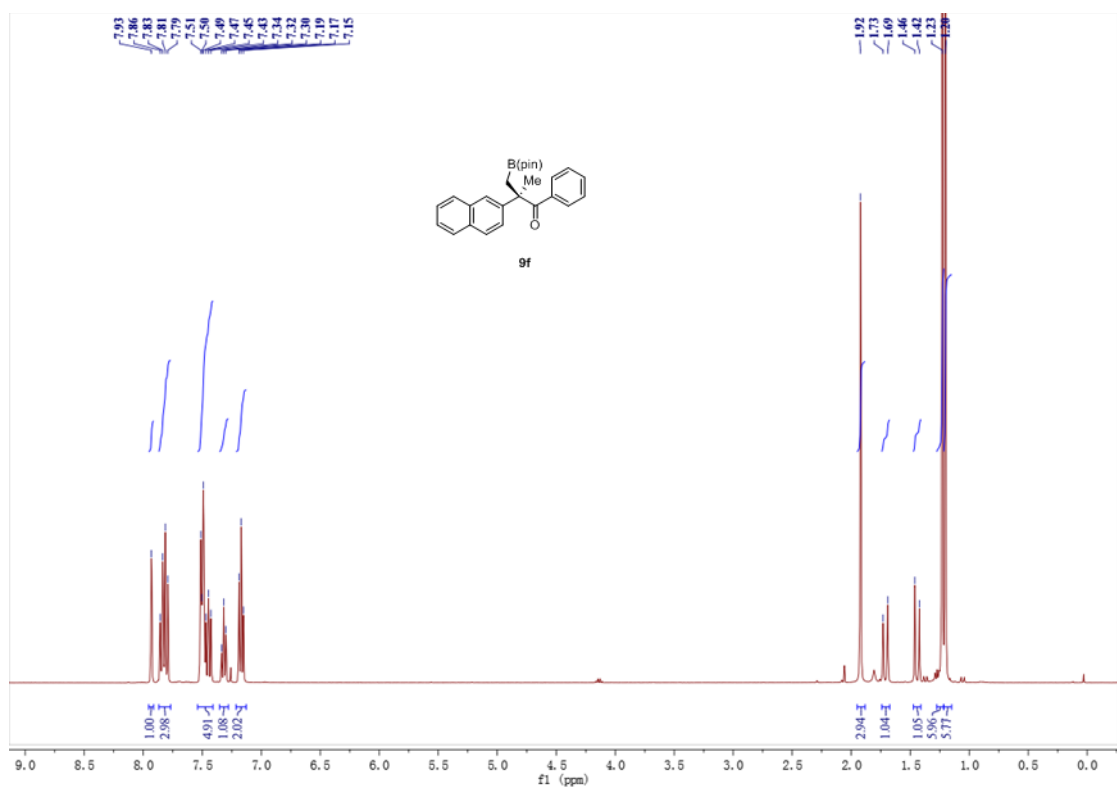

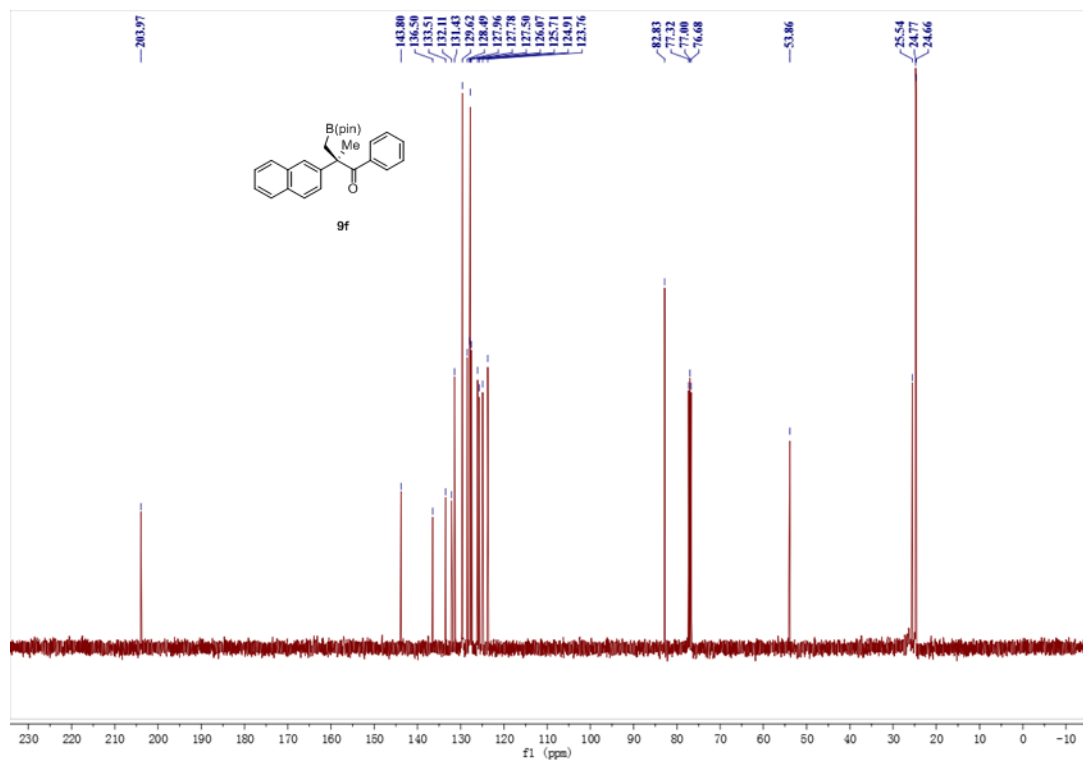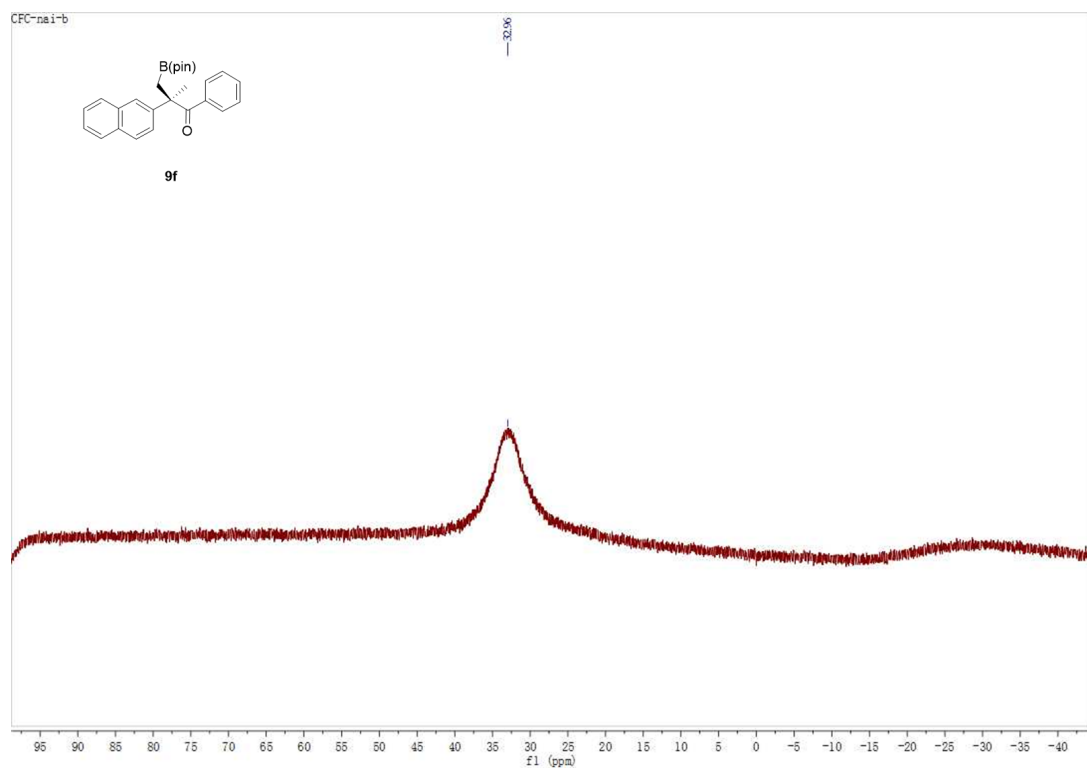

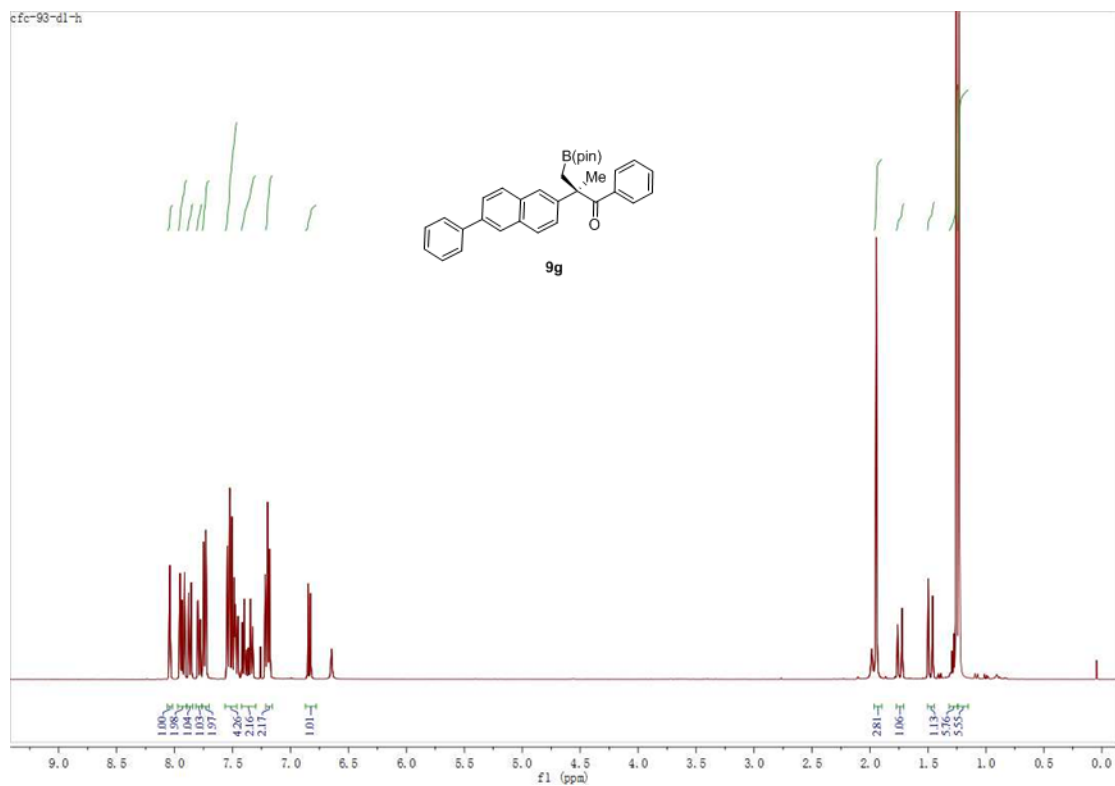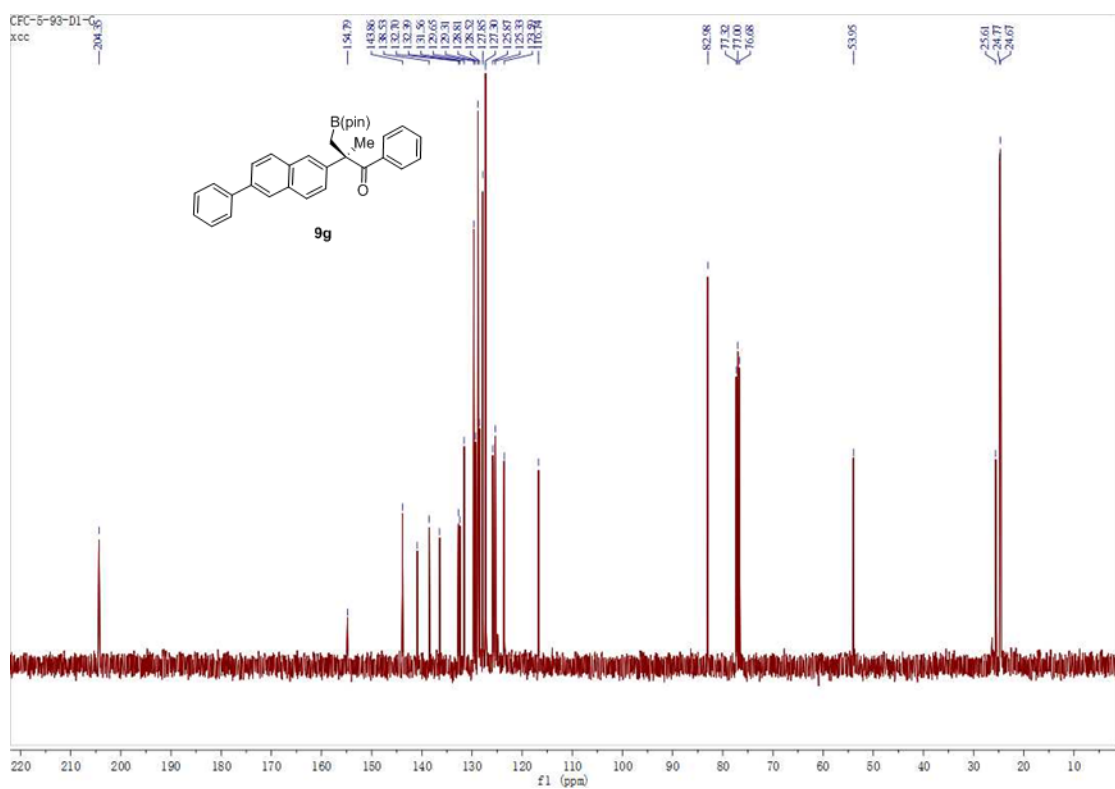

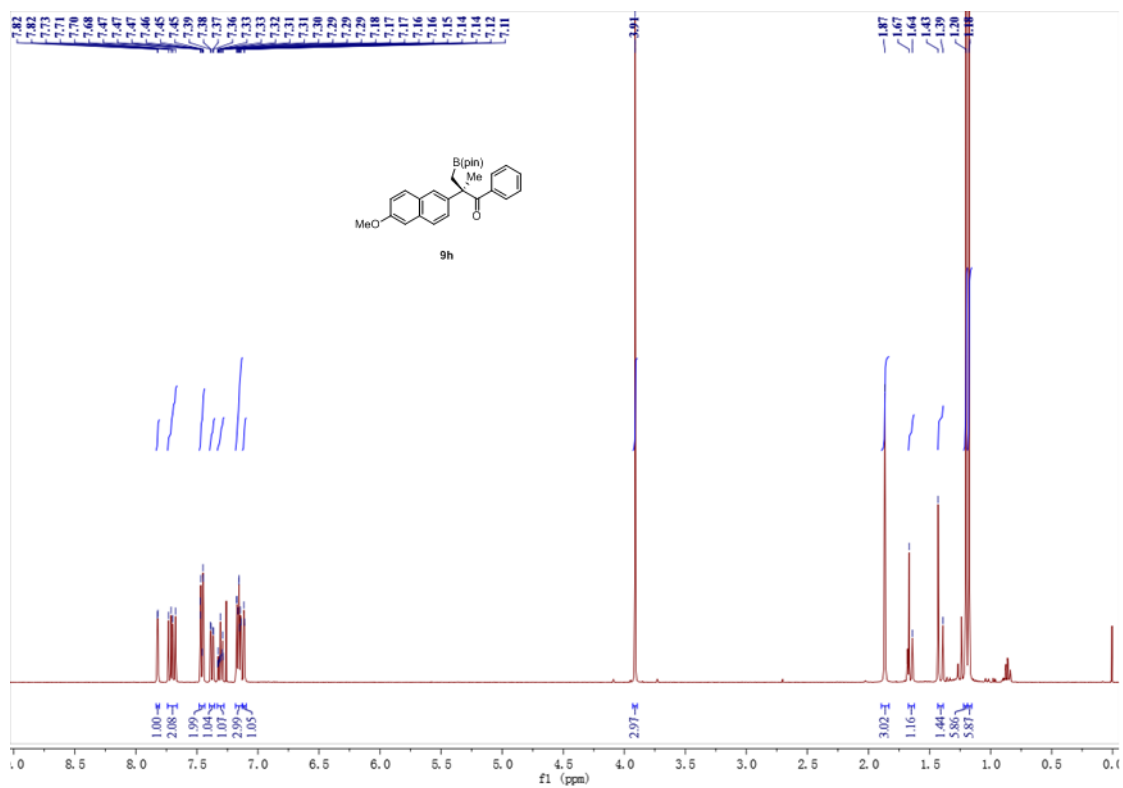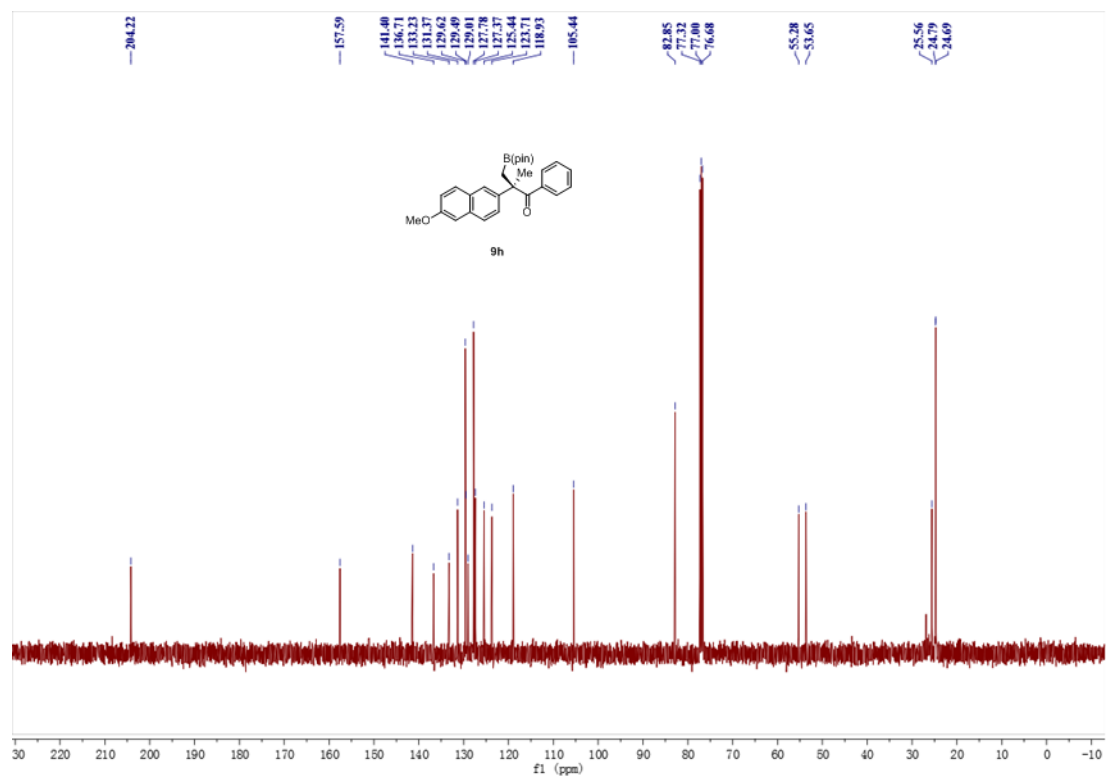

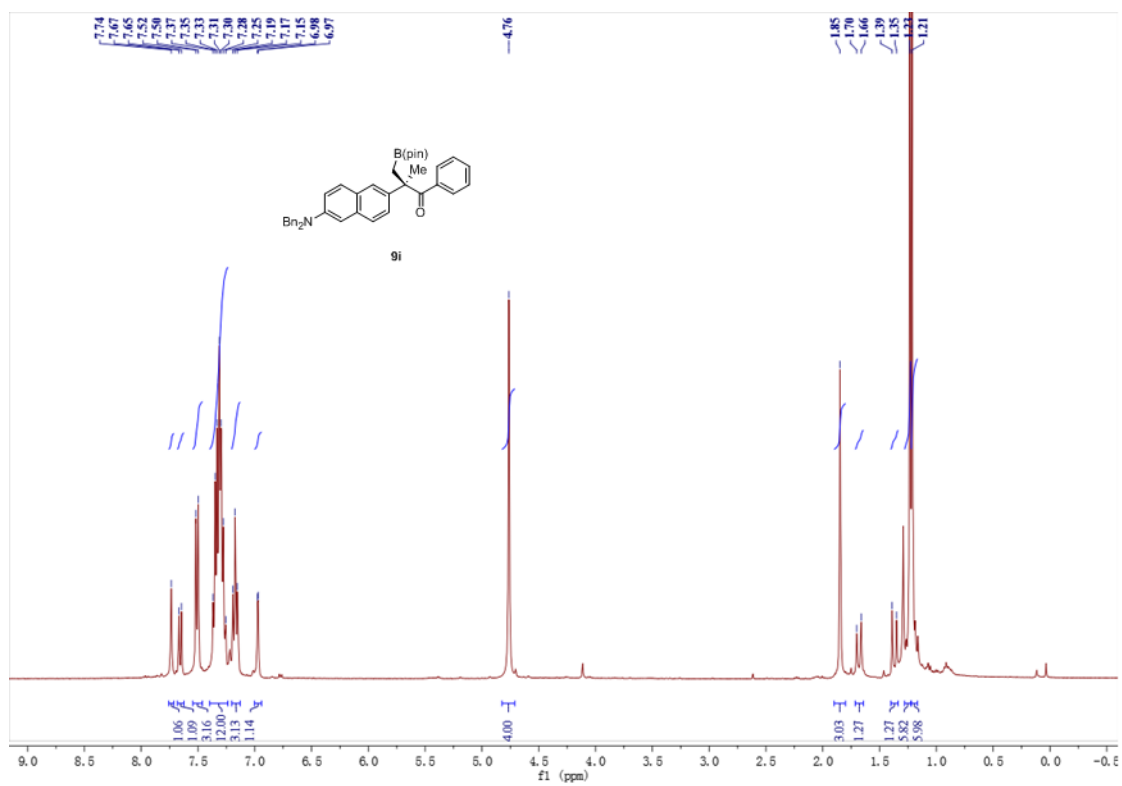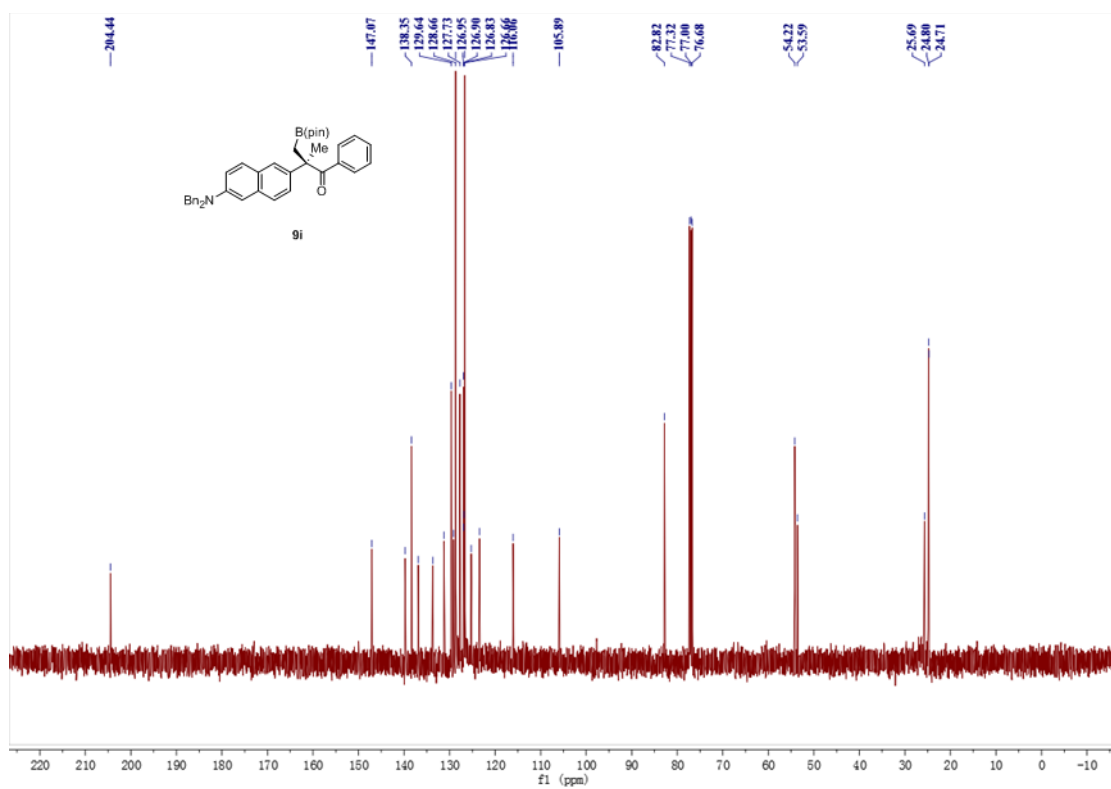

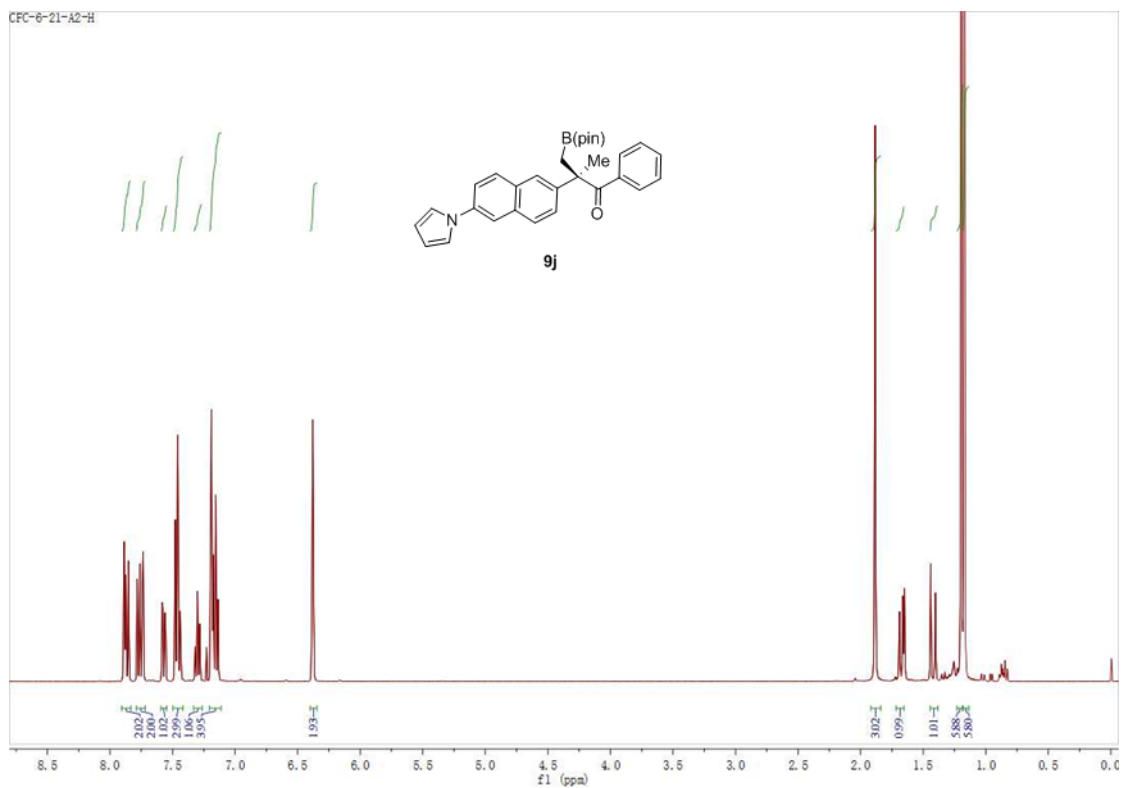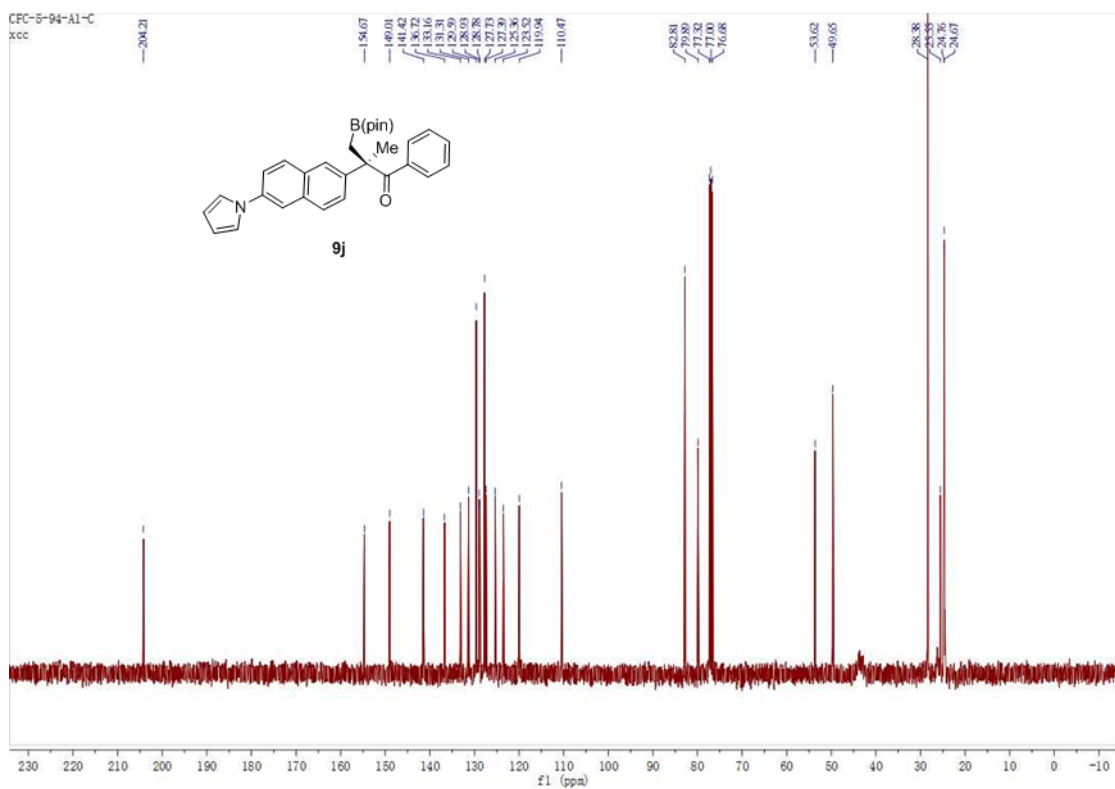



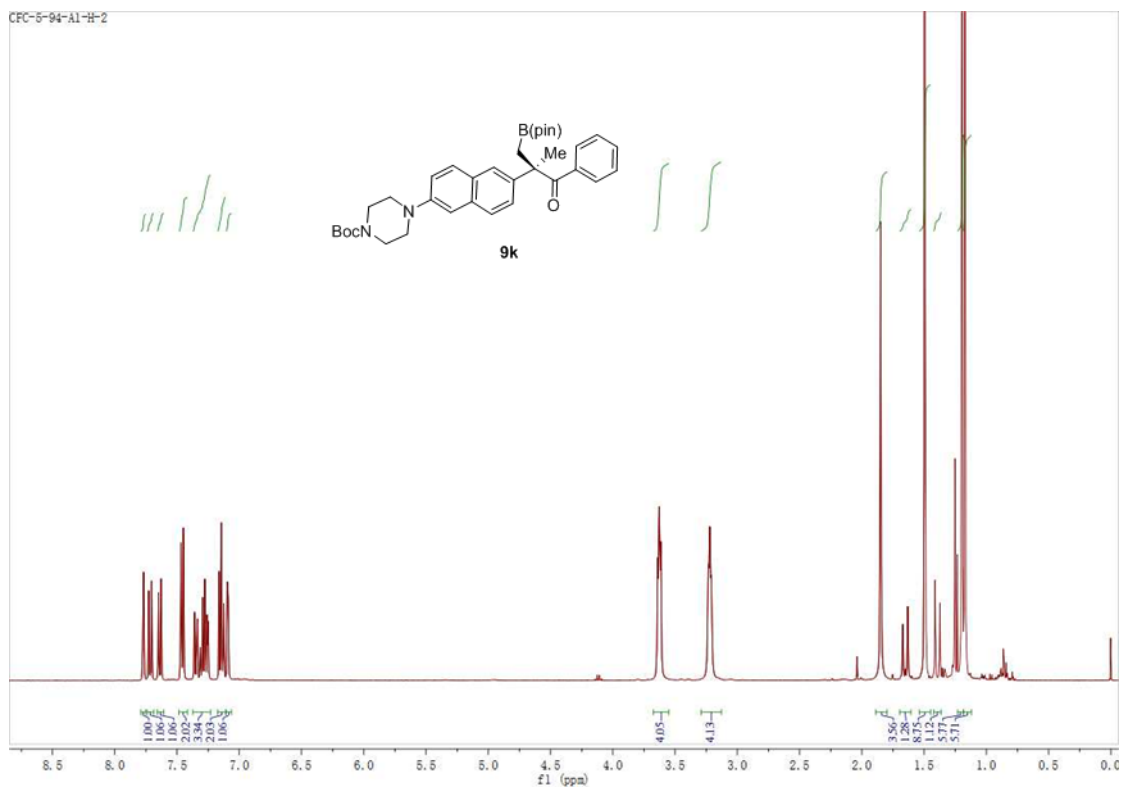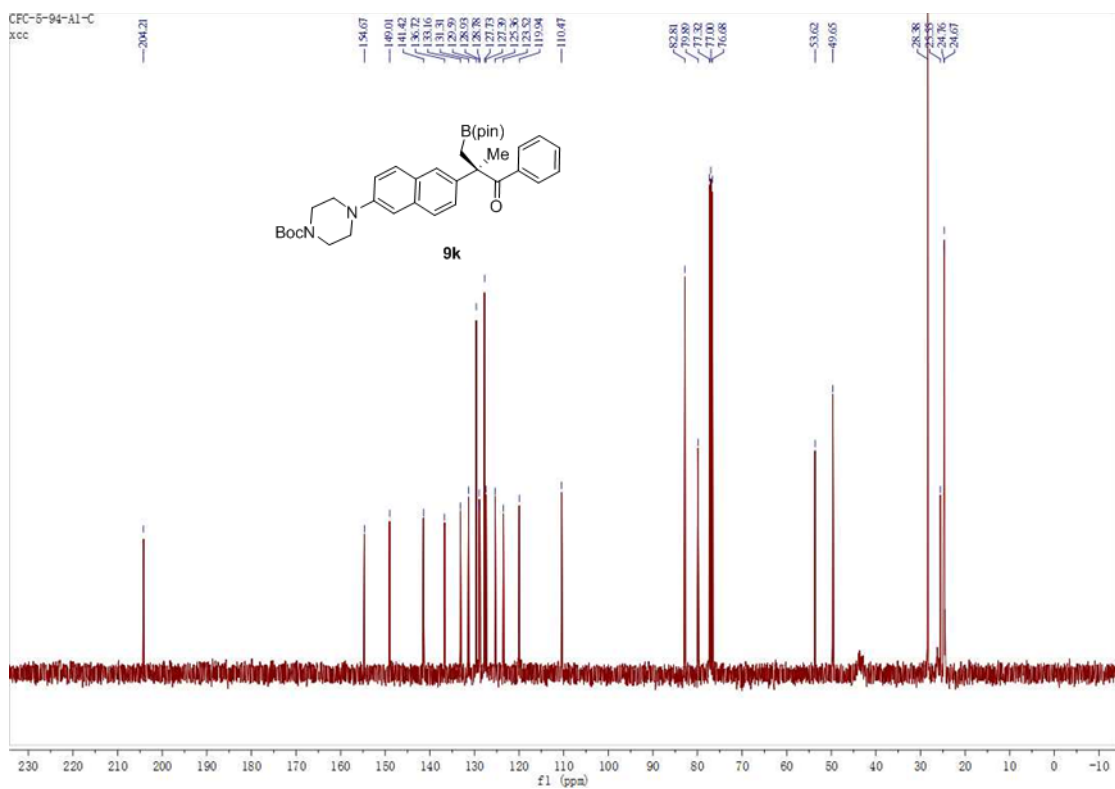



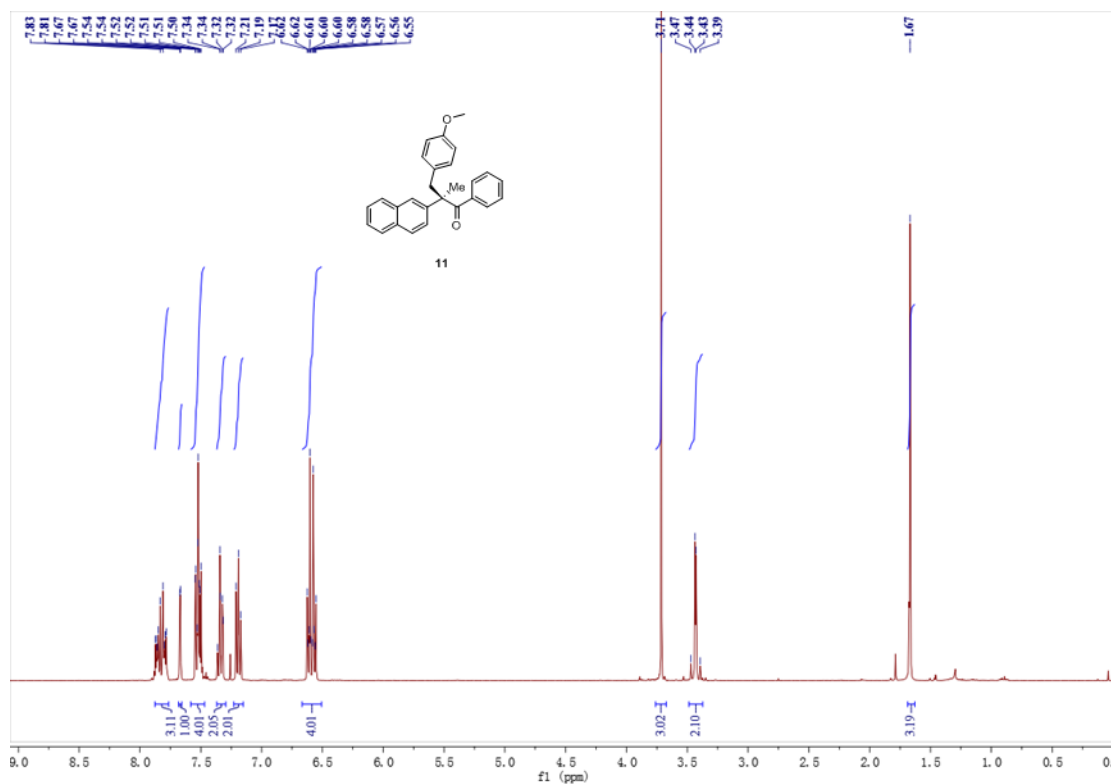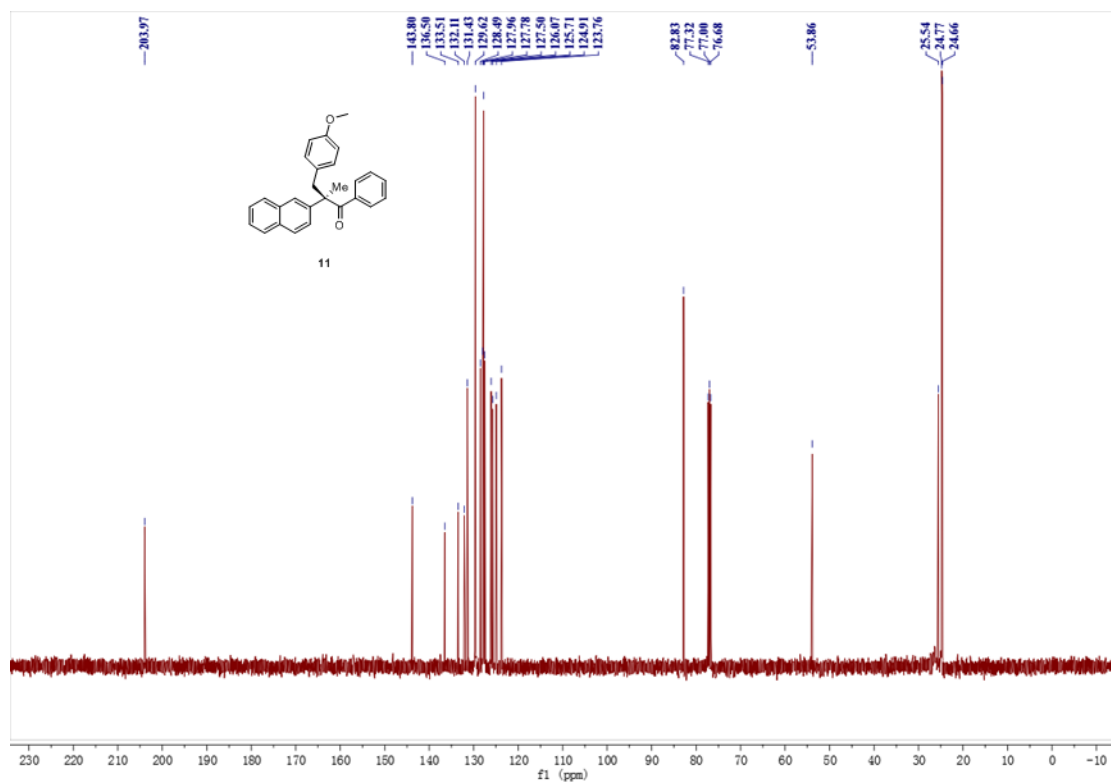

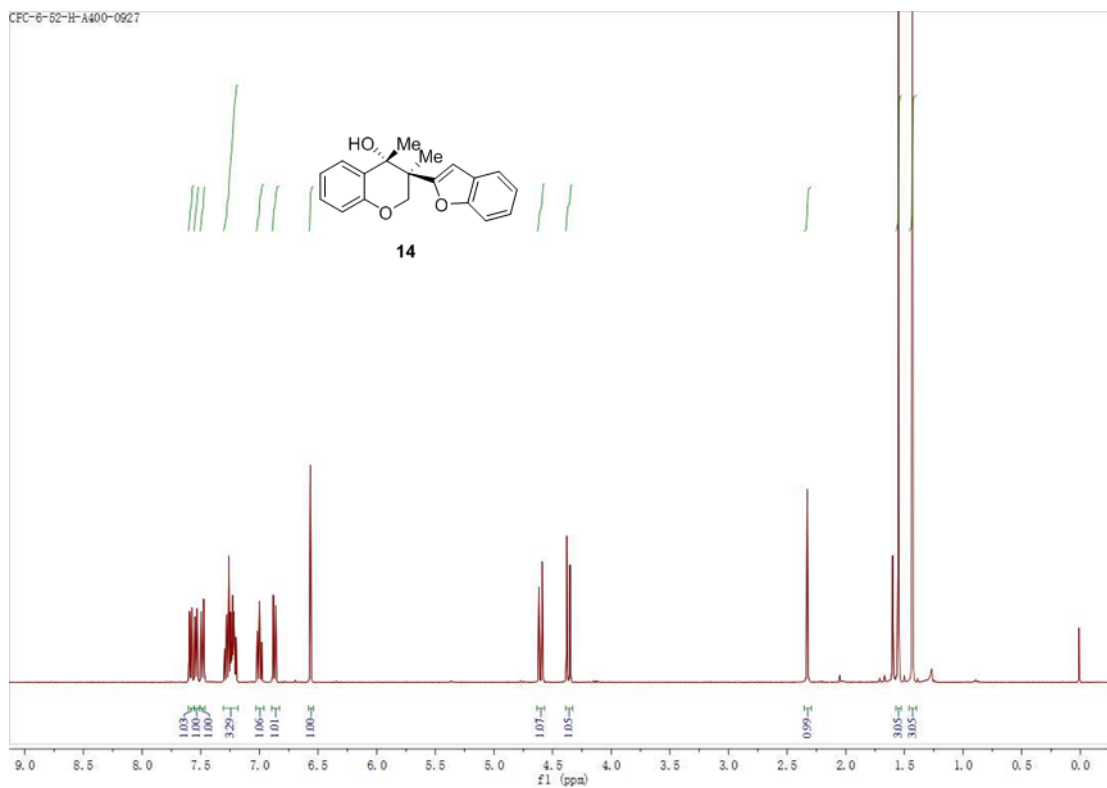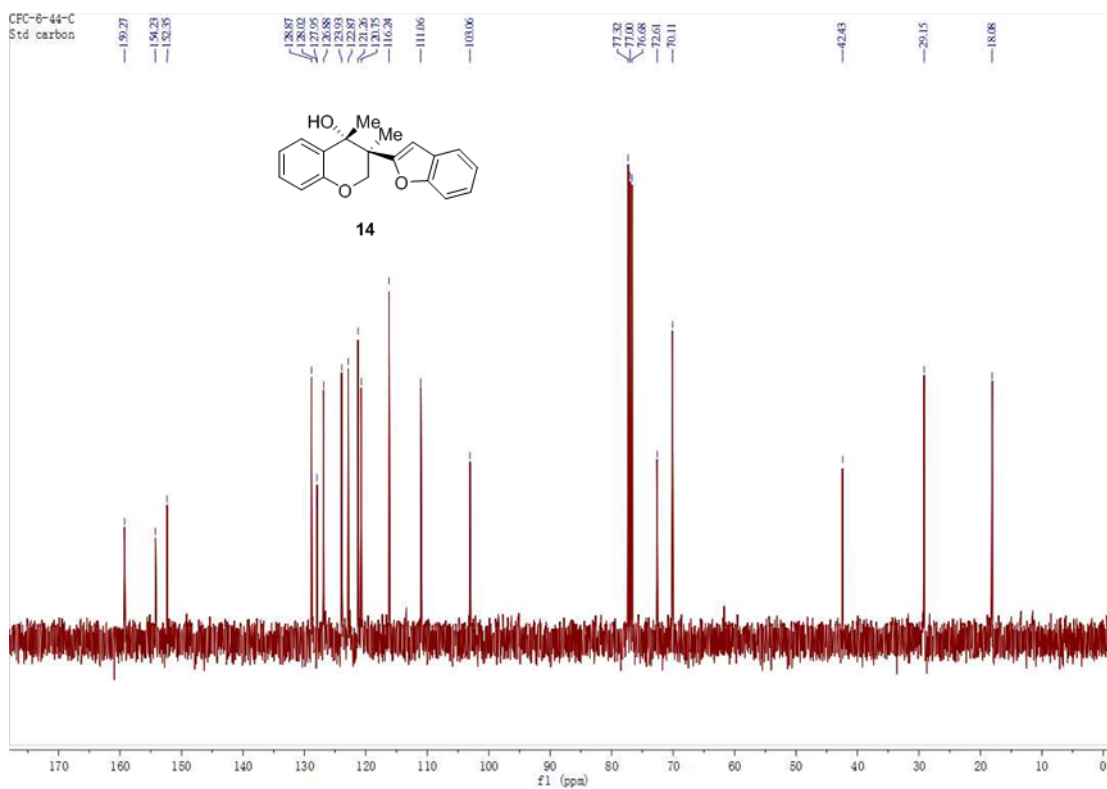

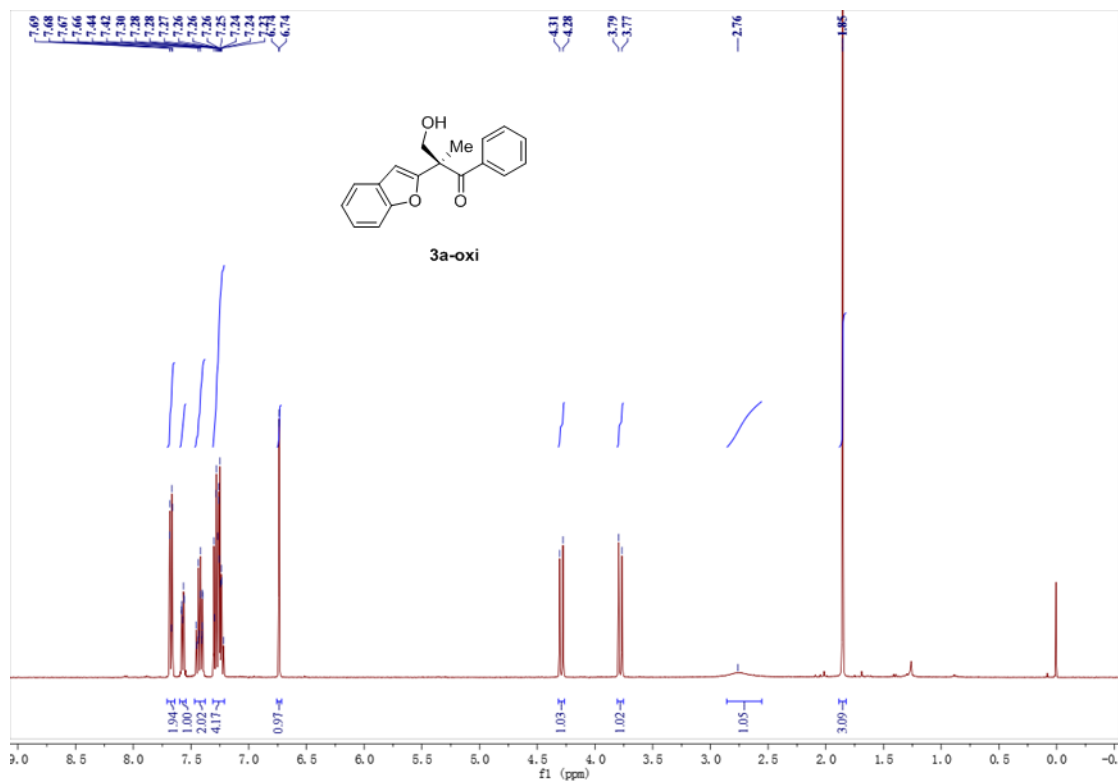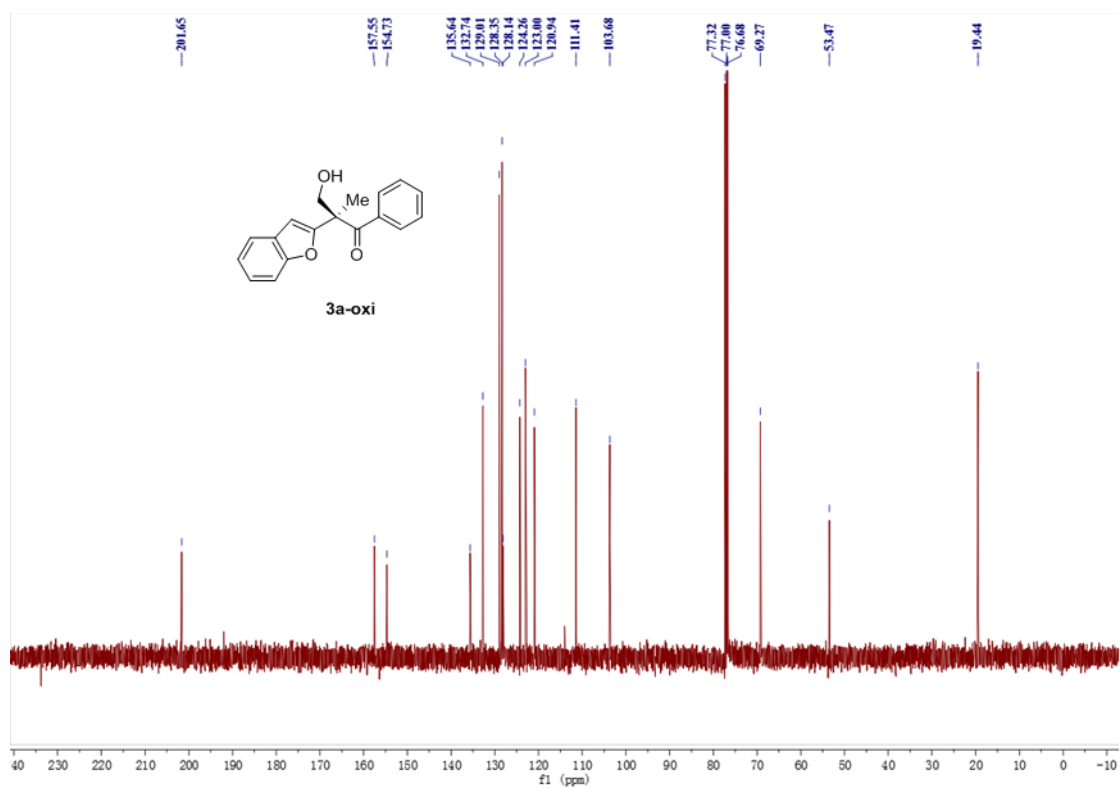

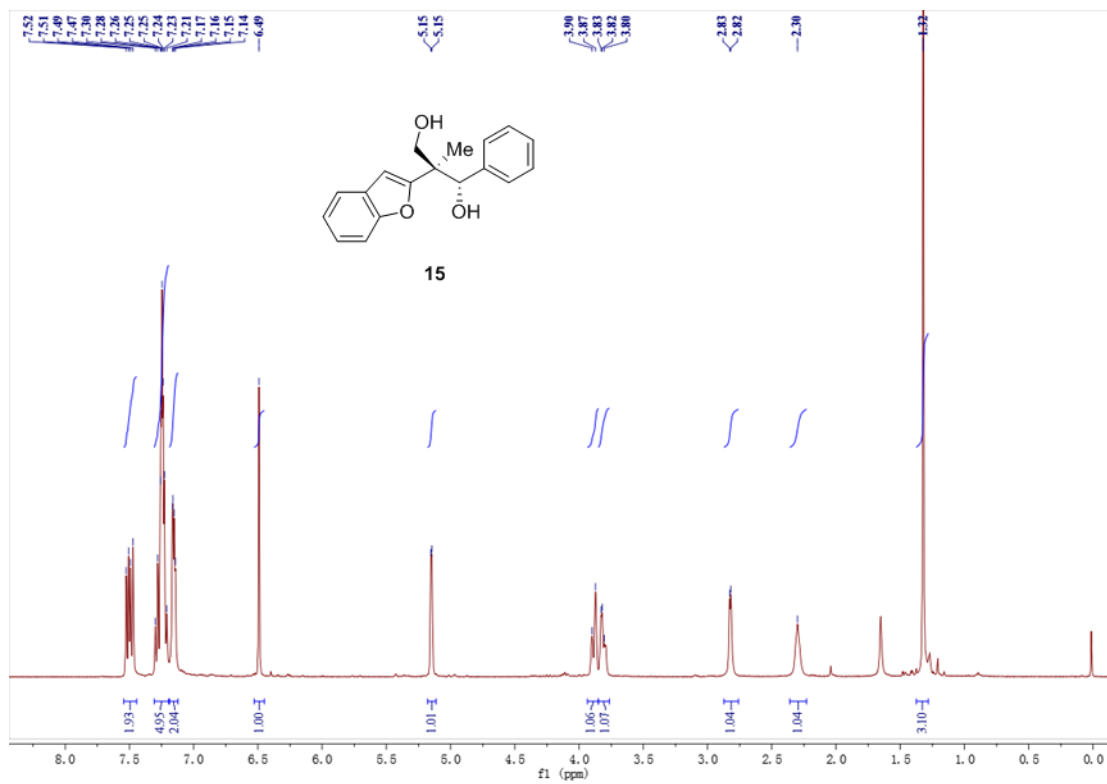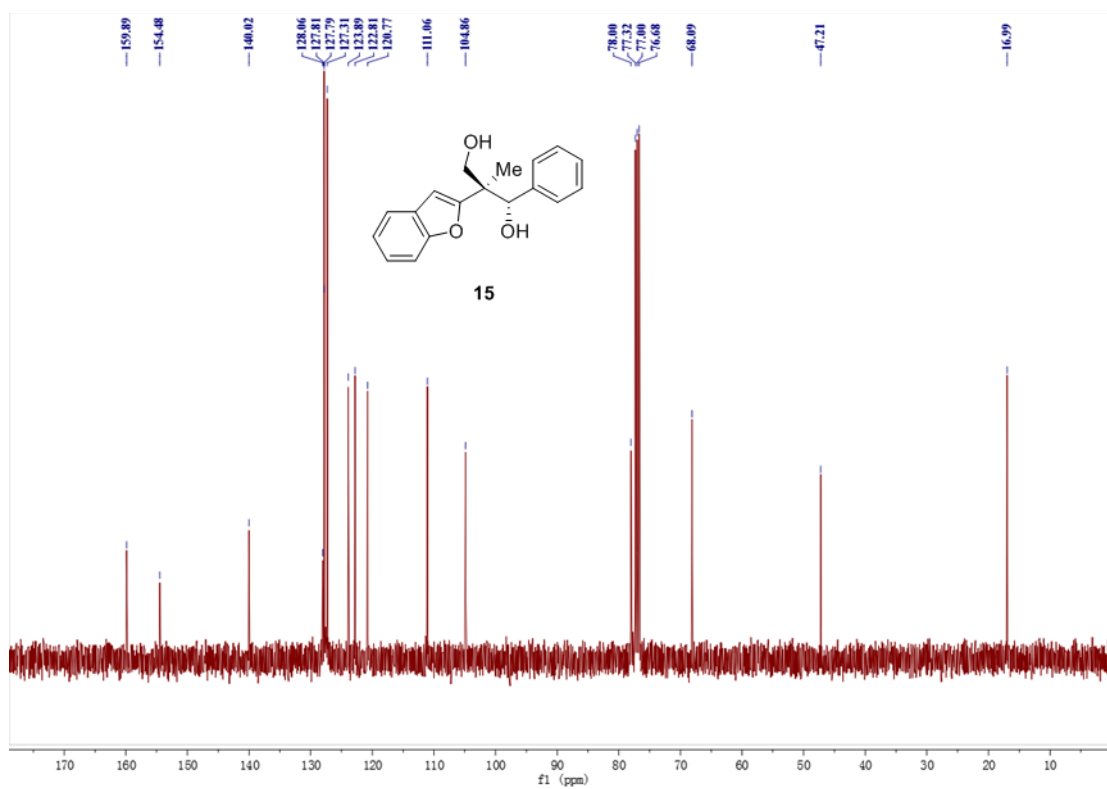

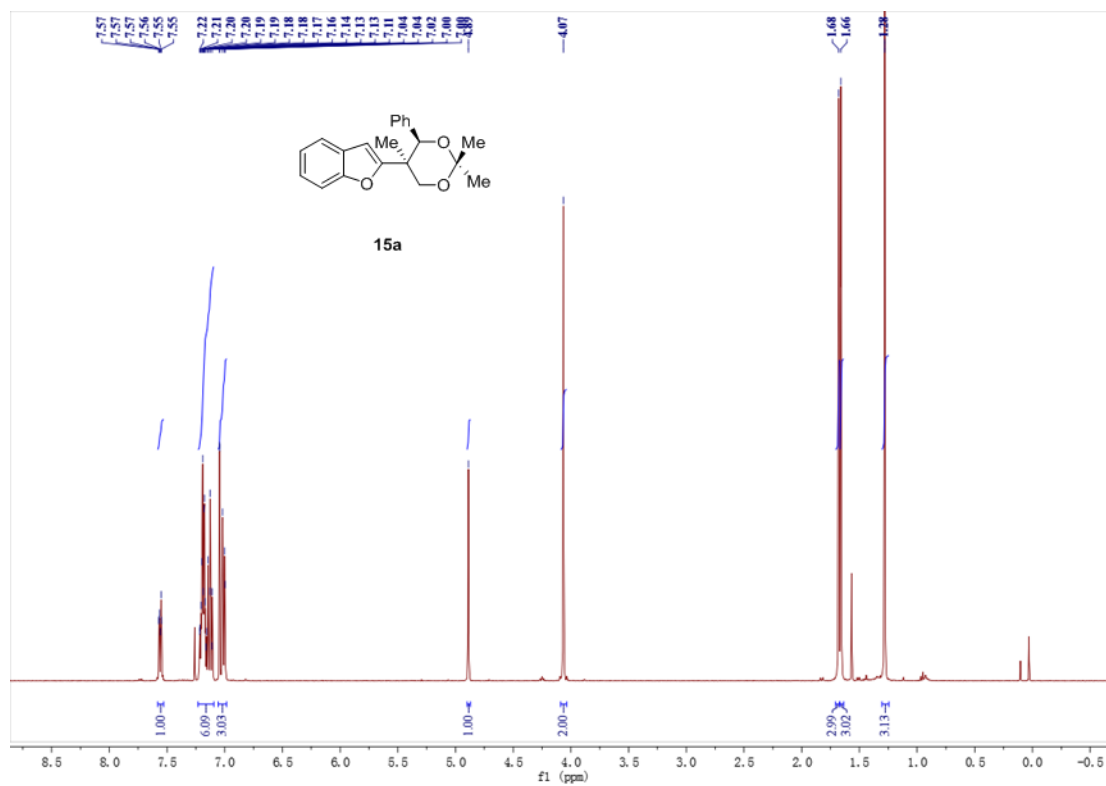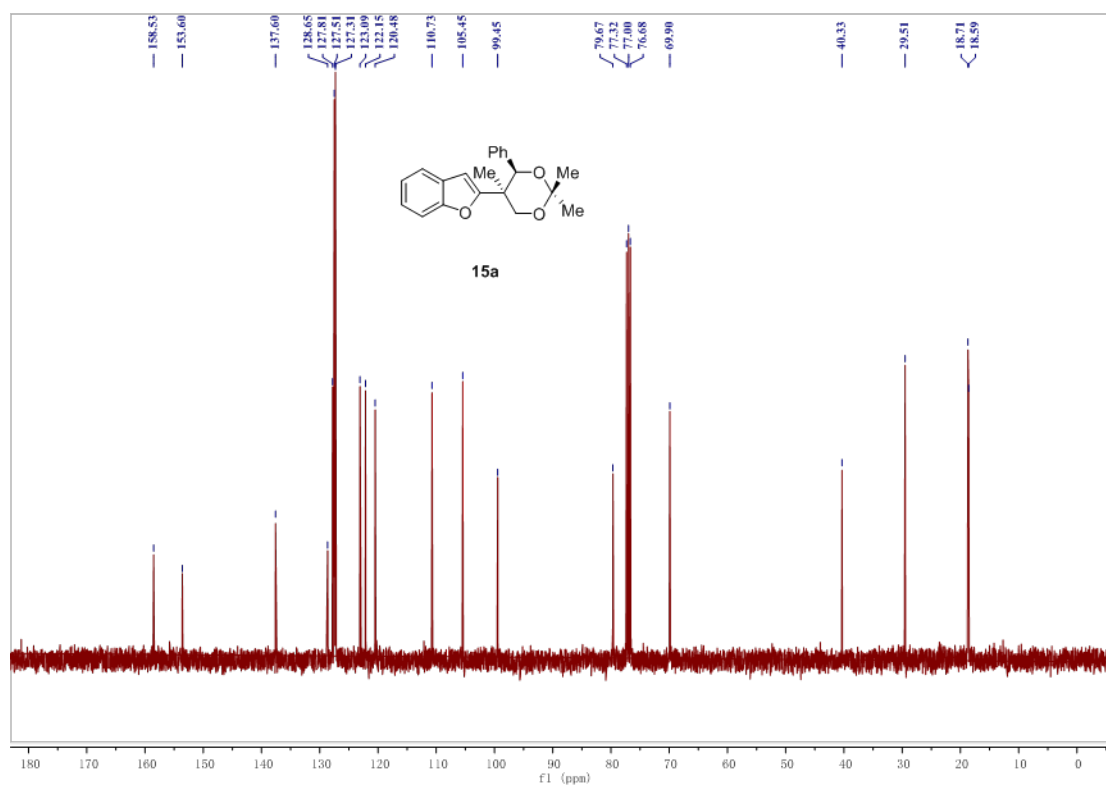

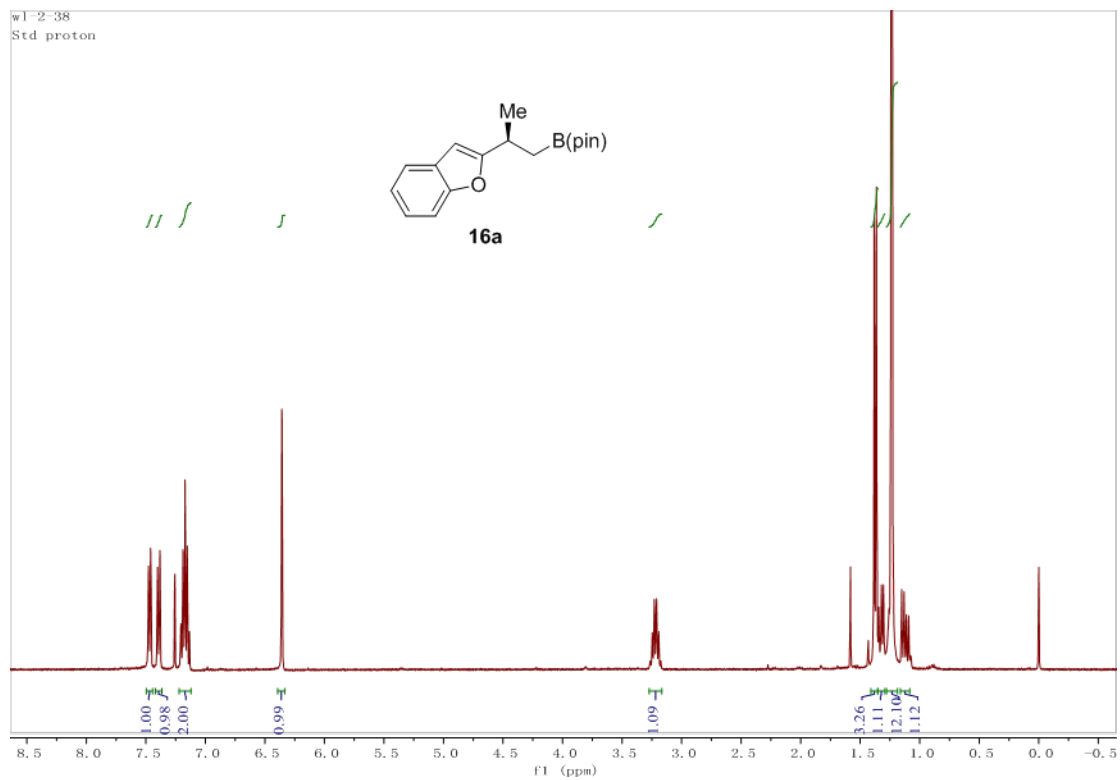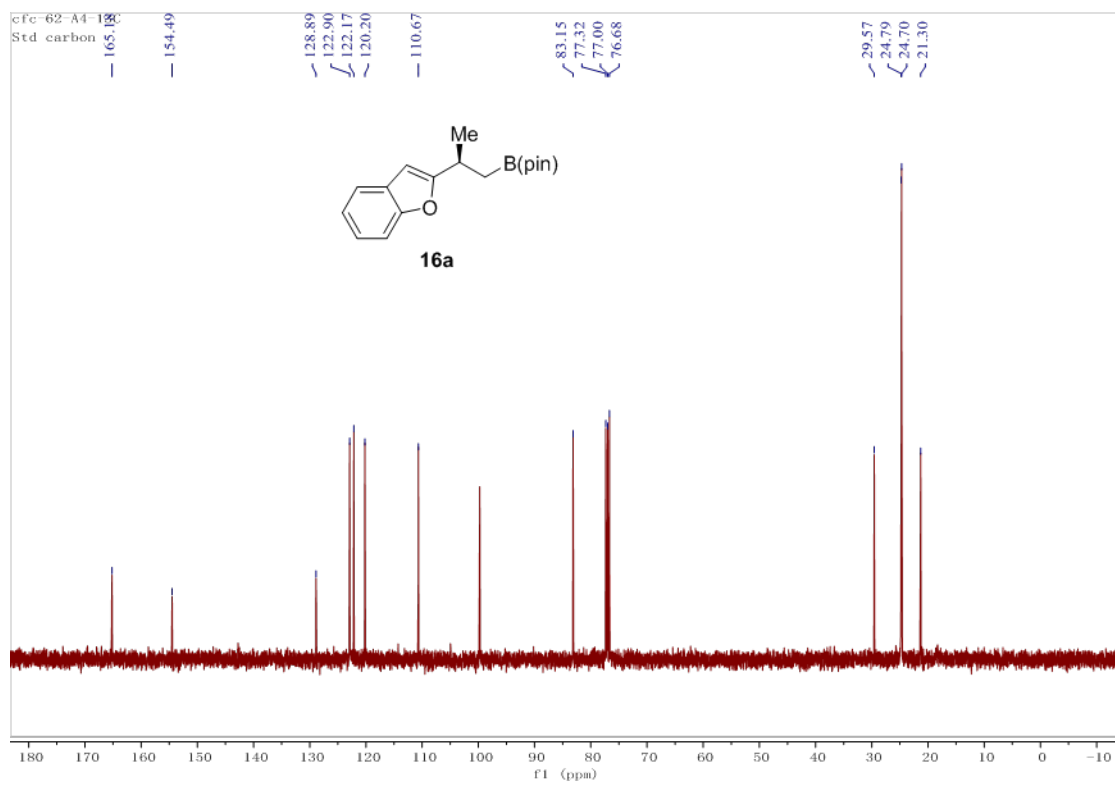



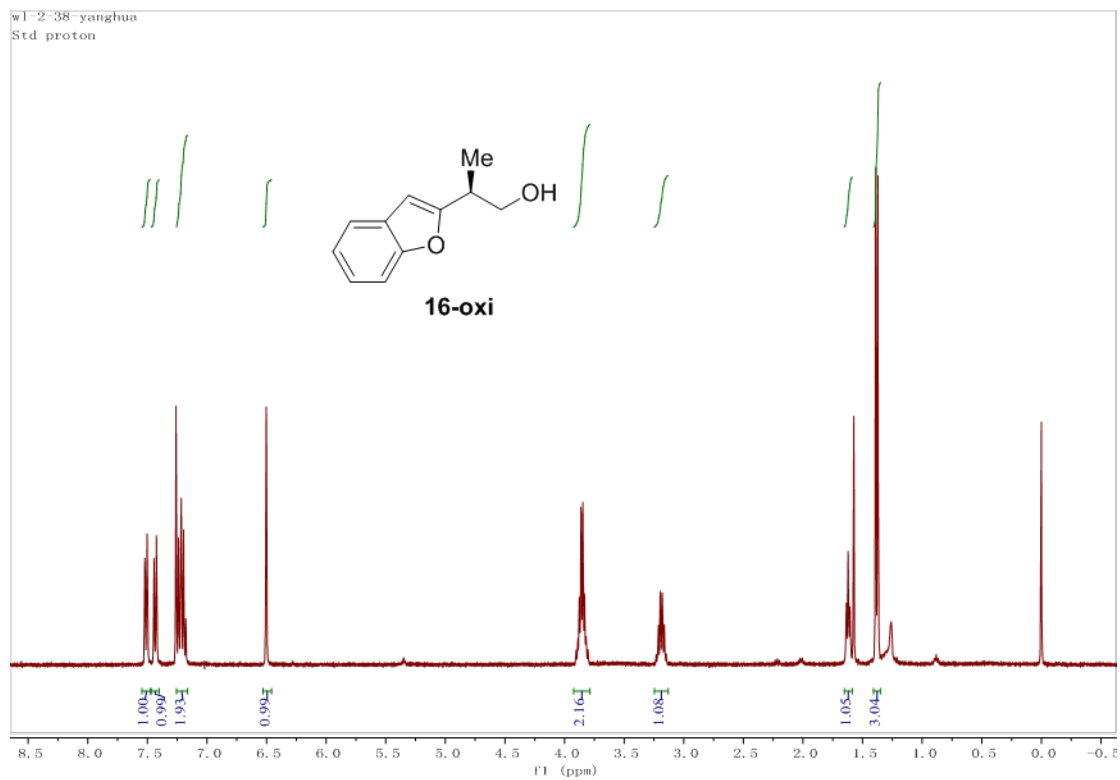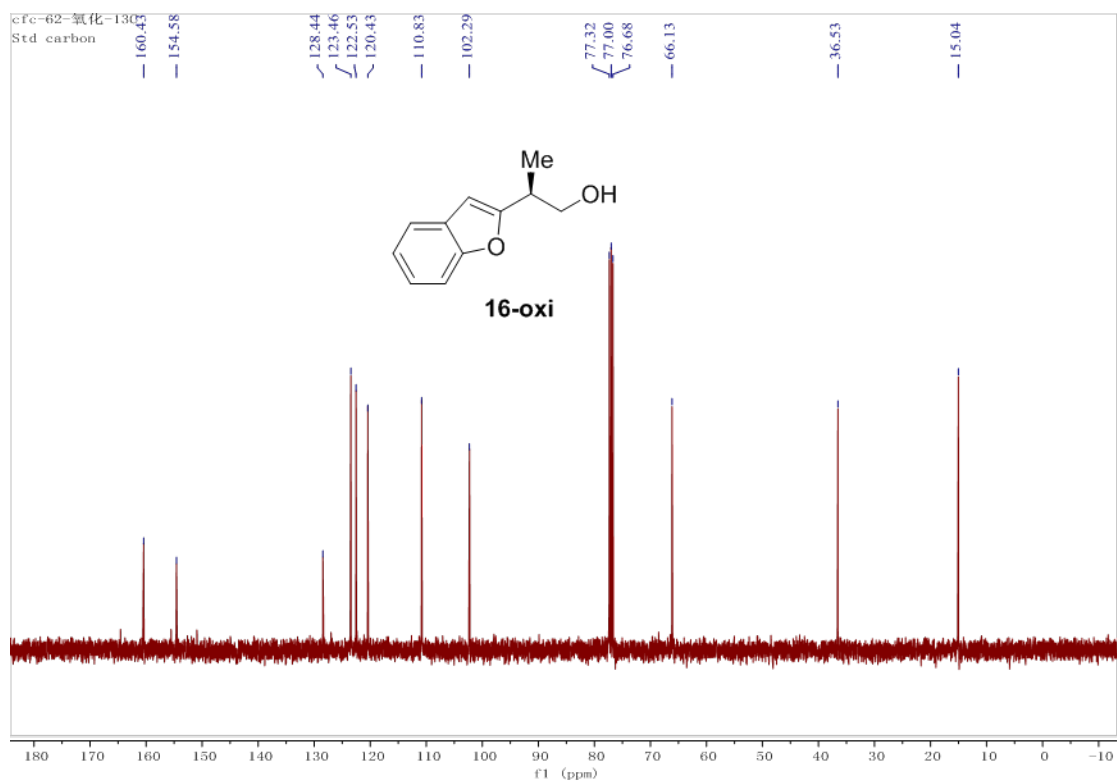

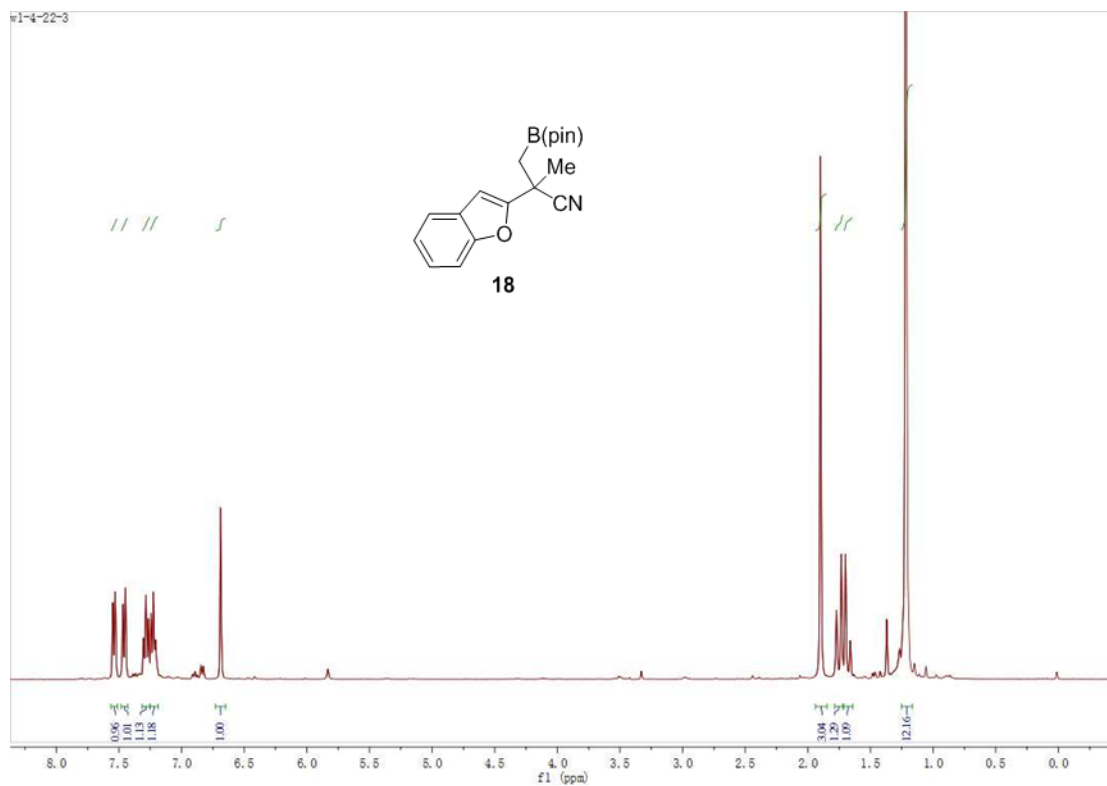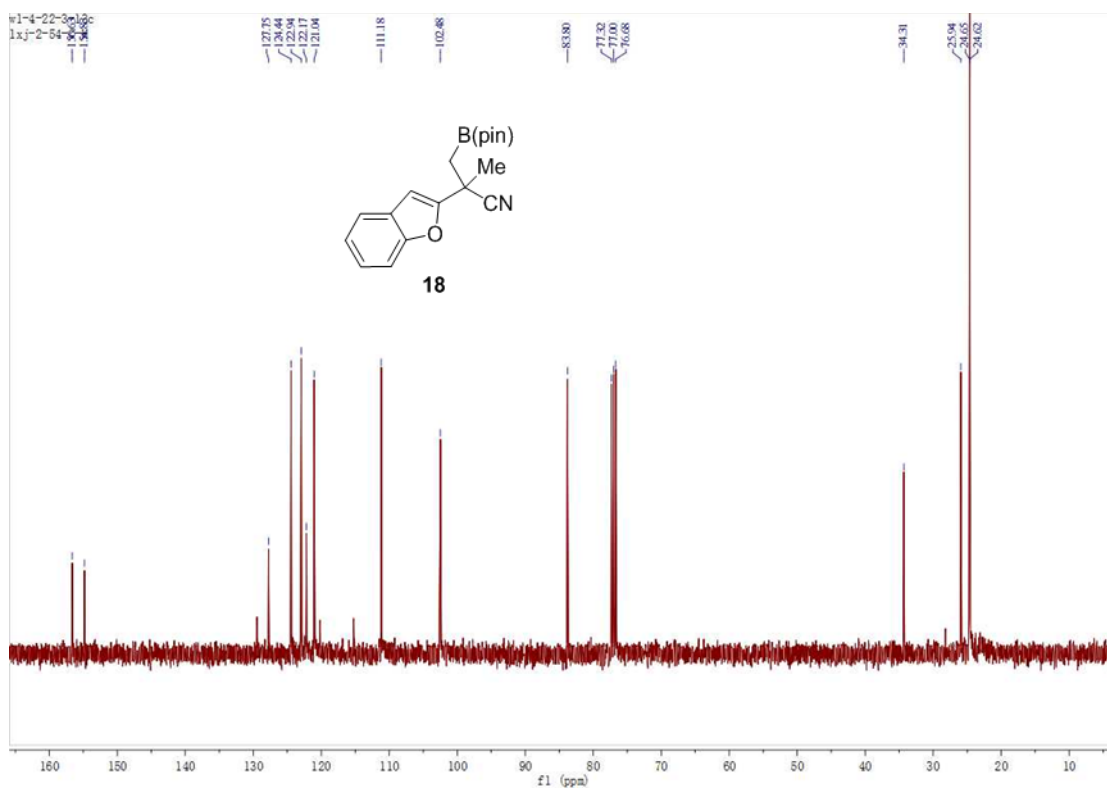

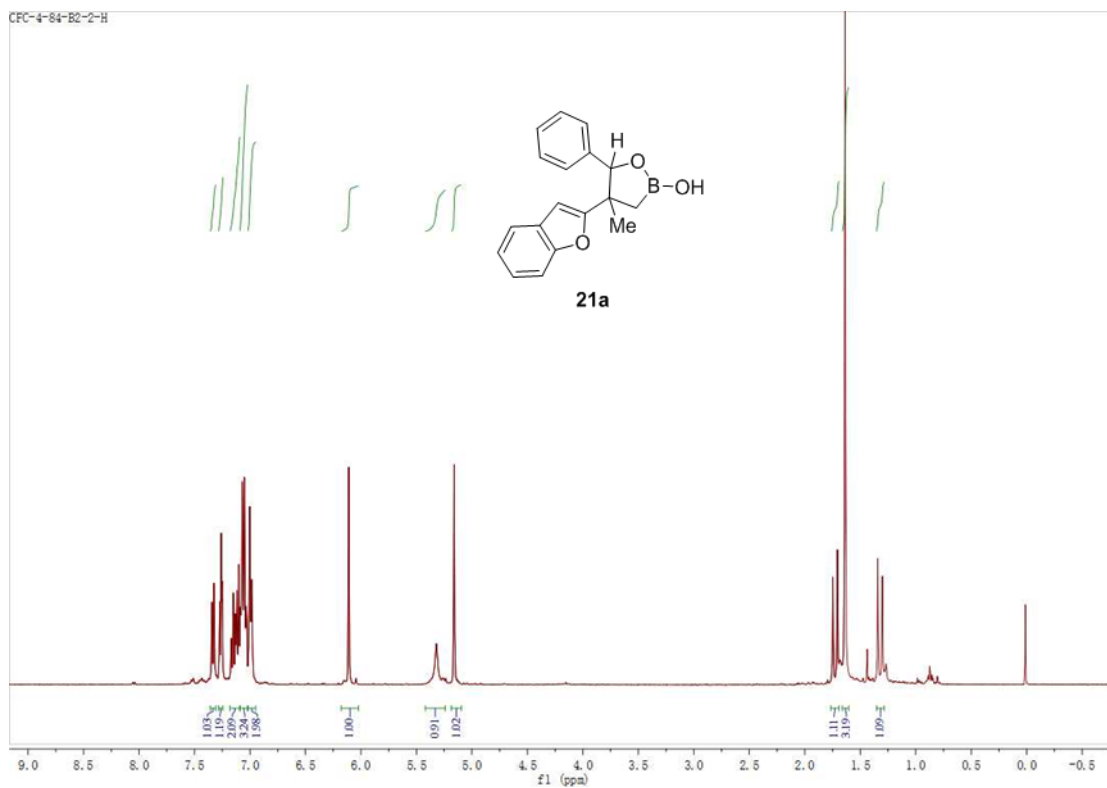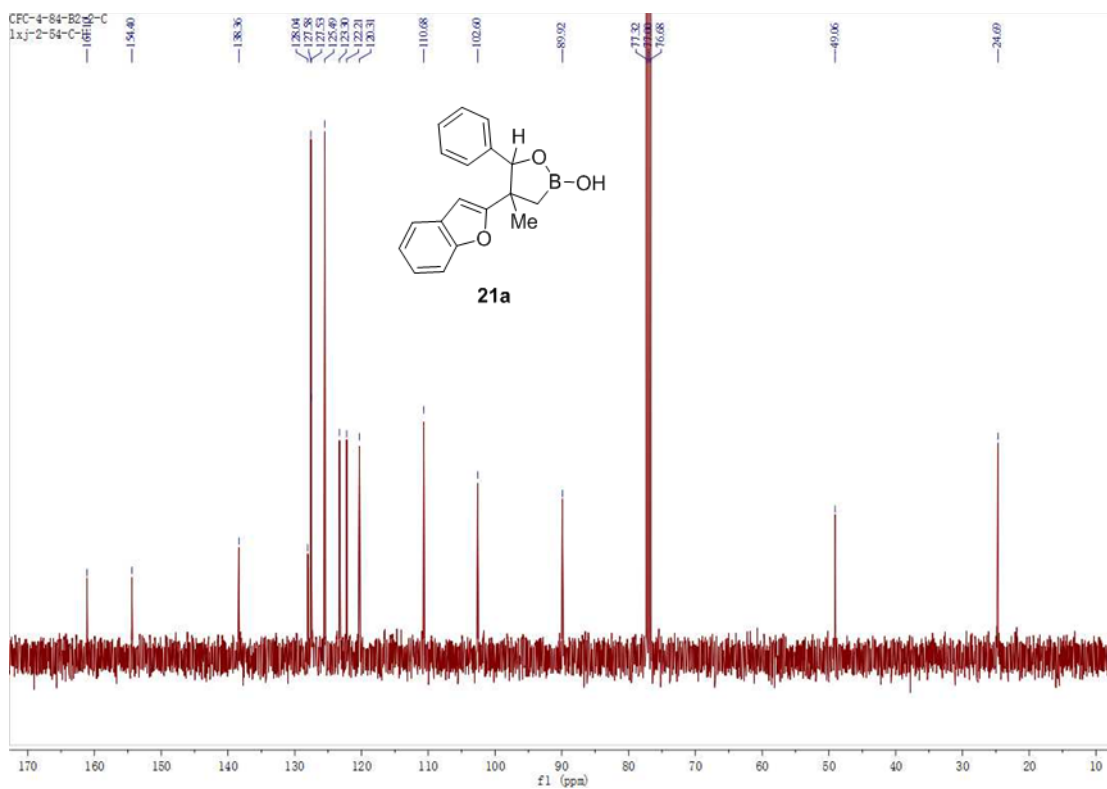

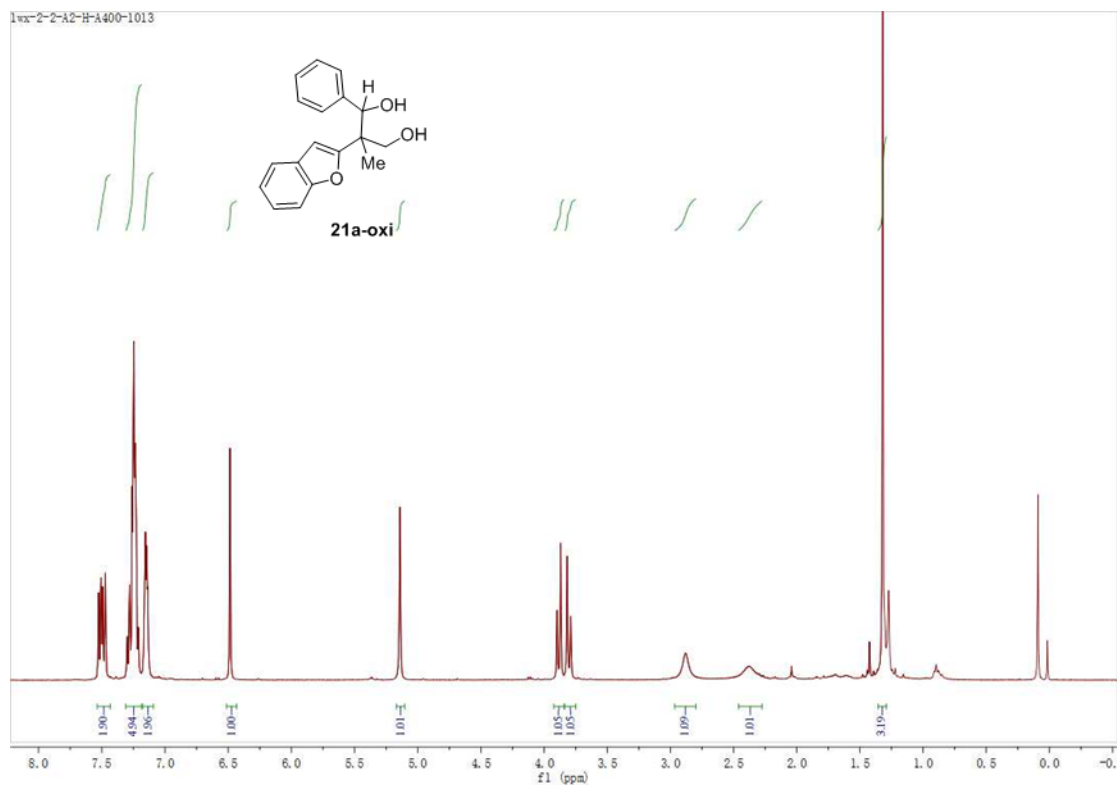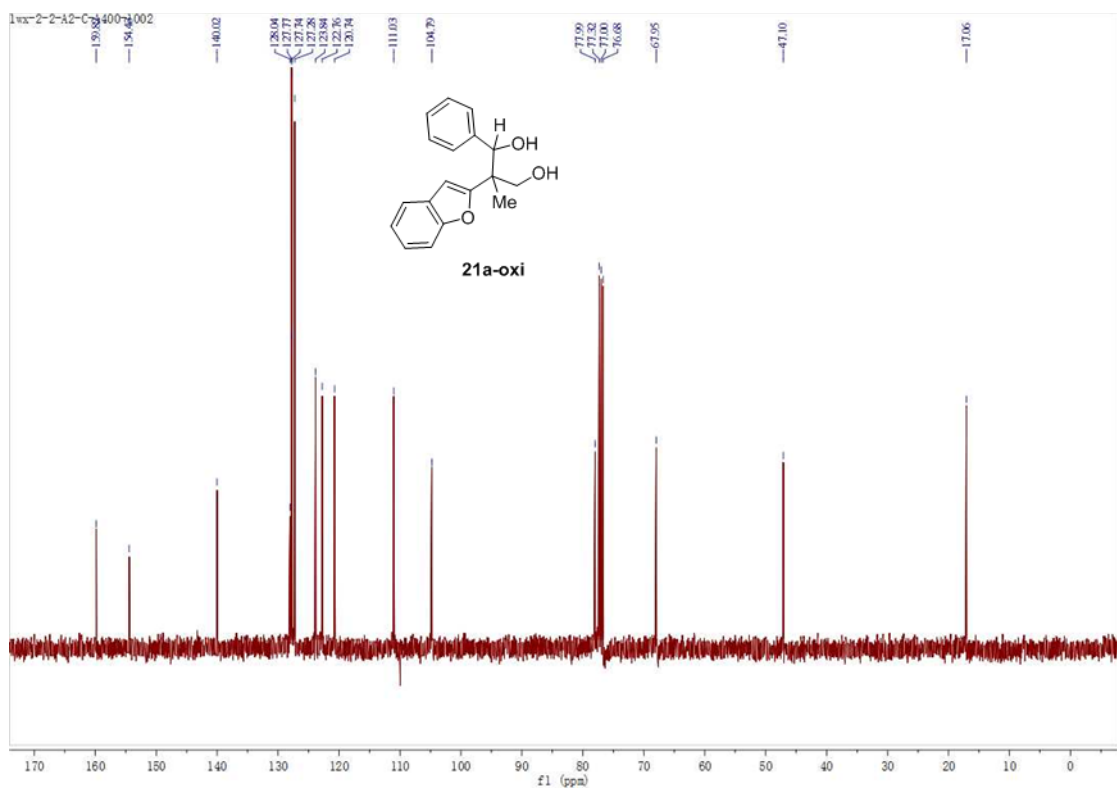

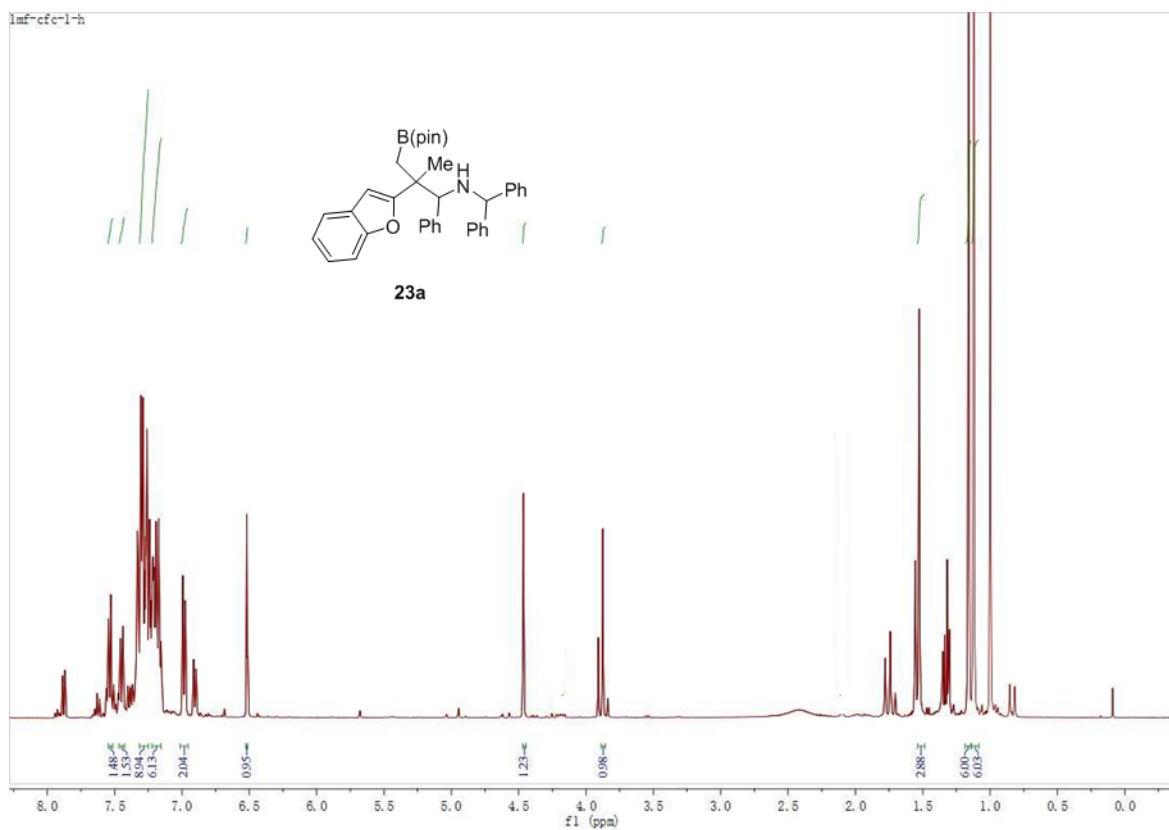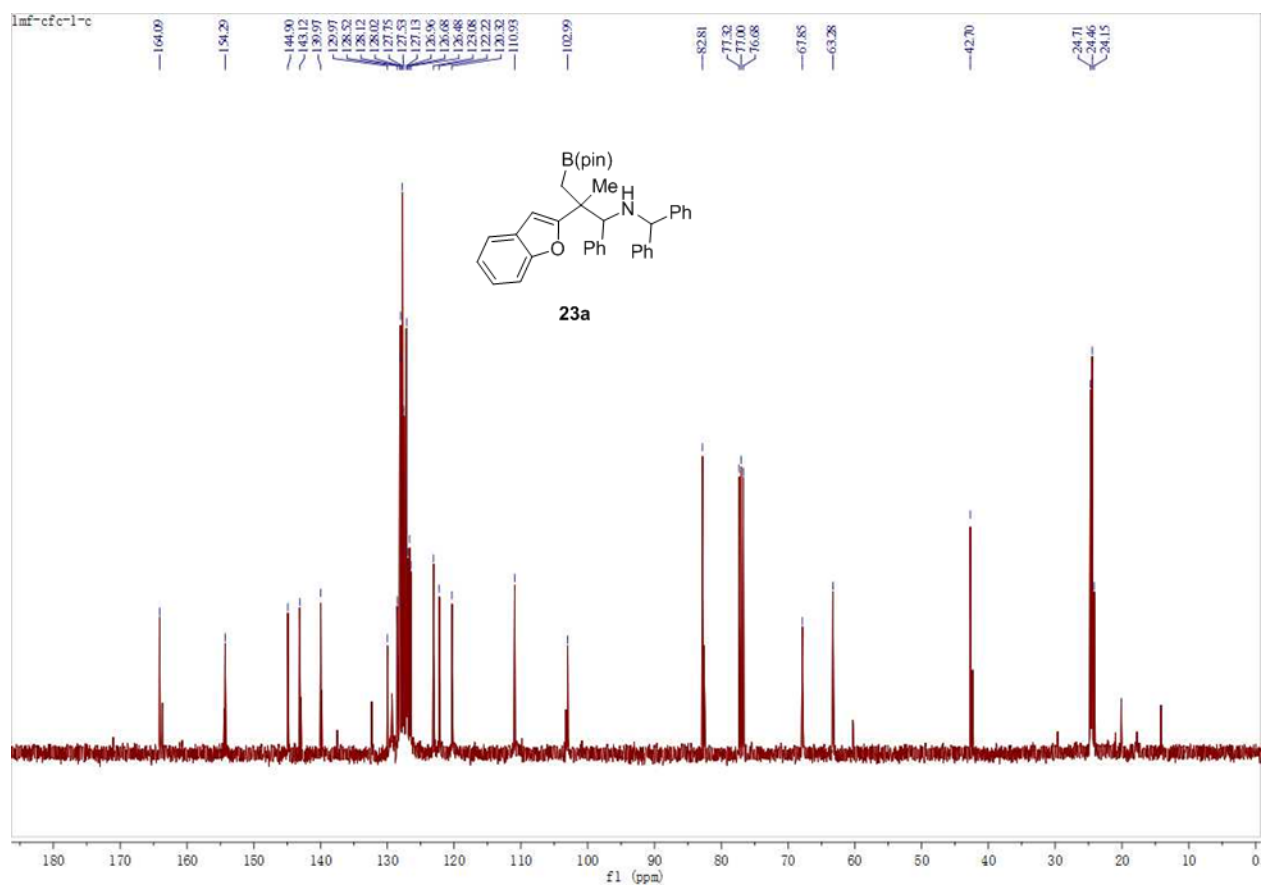

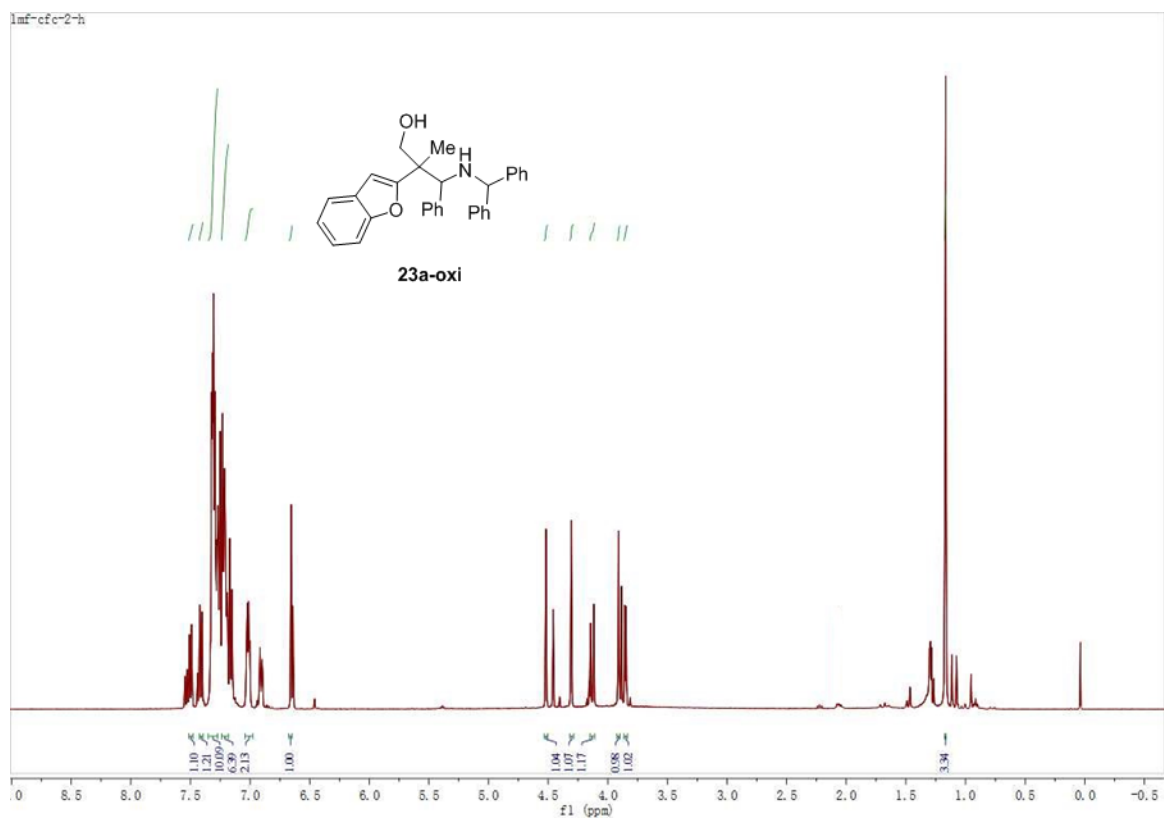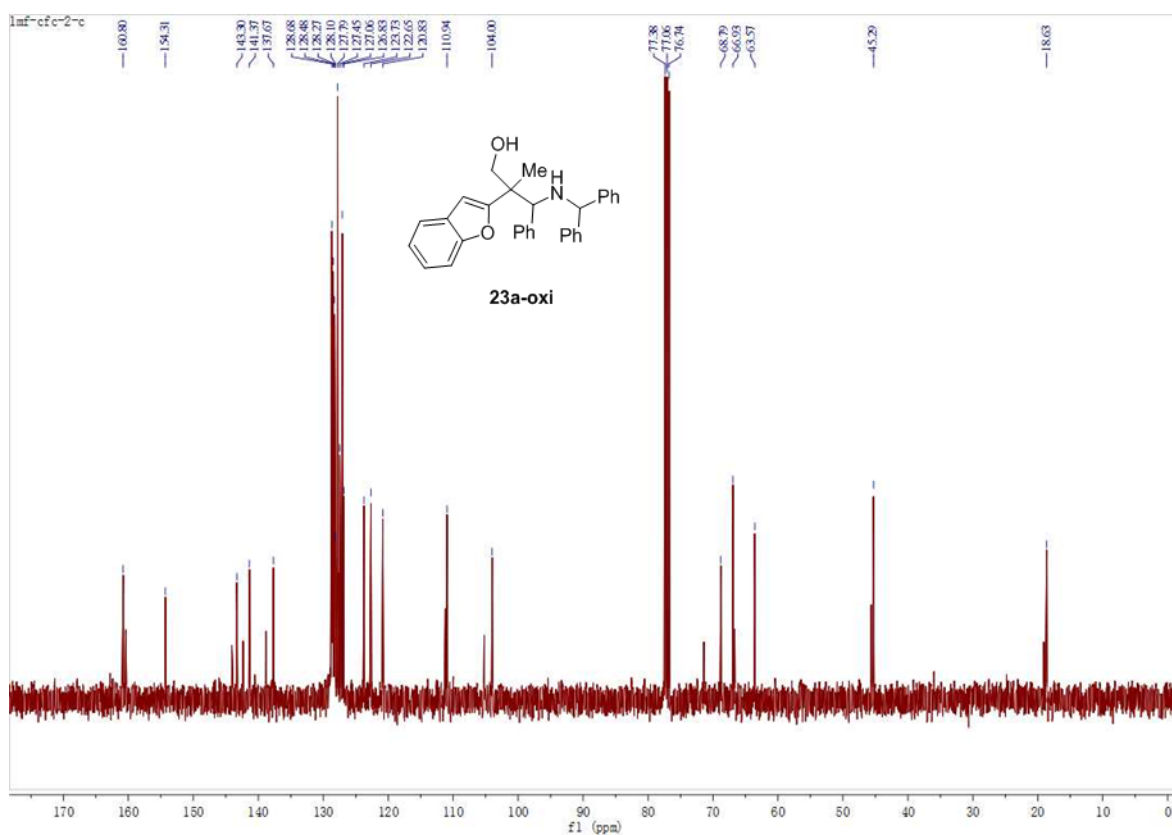

Supplement: SC-009-C8SC00827B-s001.pdf [file SC-009-C8SC00827B-s001.pdf]
